# Supplementary material for: Hypoxic exosomes facilitate angiogenesis and metastasis in esophageal squamous cell carcinoma through altering the phenotype and transcriptome of endothelial cells
Source: J Exp Clin Cancer Res. 2019 Sep 5;38:389. doi: 10.1186/s13046-019-1384-8 (PMC6727585; doi:10.1186/s13046-019-1384-8)
Supplement: Supplementary file 2 — Differentially expressed RNA between control group and norm-Exo group. (XLSX 1939 kb) [file 13046_2019_1384_MOESM2_ESM.xlsx]

## Sheet: ReadMe
表名称	列名称	列含义
表格名称	probe_set	探针集编号
	Test1_average	Test1 组平均信号值
	Con_average	Con 组平均信号值
	FC	两组比较分析中基因变化倍数
	Regulation	实验中基因的调控形式
	Gene.Symbol	基因名称
	Description	基因描述
	biotype	基因属性分类
	Chromosome	染色体编号
	Strand	正义/反义链转录
	Public.Gene.IDs	发表期刊中基因的编号
	Start	基因在染色体开始位置
	Stop	基因在染色体终止位置
	total_probes	该探针集包含的总探针数目
	Cytoband	Cytoband 数据库注释信息
	Entrez.ID	Entrez 数据库基因ID
	mRNA.Accession	mRNA编号
	mRNA.Source	mRNA来源
	mRNA.Description	mRNA描述
	mRNA.SeqName	mRNA所在染色体编号
	mRNA.Assignment.Score	探针基因比对分值
	mRNA.Assignment.Coverage	探针集比对覆盖度
	mRNA.Direct.Probes	mRNA 准确的探针
	mRNA.Possible.Probes	mRNA 可能的探针基因
	SwissProt.mRNA.Accession	SwissProt mRNA号
	SwissProt.Accession	SwissProt 蛋白号
	UniGene.Accession	UniGene 数据库中的mRNA 号
	UniGene.ID	UniGene ID号
	UniGene.Expression.Information	UniGene 表达信息
	GO.Biological.Process.Accession	GO信息-生物过程-登录号
	GO.Biological.Process.ID	GO信息-生物过程-ID号
	GO.Biological.Process.Term	GO信息-生物过程-名称
	GO.Biological.Process.Evidence	GO信息-生物过程-实验依据
	GO.Cellular.Component.Accession	GO信息-细胞组份-登录号
	GO.Cellular.Component.ID	GO信息-细胞组份-ID号
	GO.Cellular.Component.Term	GO信息-细胞组份-名称
	GO.Cellular.Component.Evidence	GO信息-细胞组份-实验依据
	GO.Melecular.Function.Accession	GO信息-分子功能-登录号
	GO.Molecular.Function.ID	GO信息-分子功能-ID号
	GO.Molecular.Function.Term	GO信息-分子功能-名称
	GO.Molecular.Function.Evidence	GO信息-分子功能-实验依据
	Pathway.Accession	KEGG pathway 登录号
	Pathway.Source	KEGG pathway 来源
	Pathway.Name	KEGG pathway 名称
	Protein.Domains.mRNA.Accession	蛋白结构域-注释的mRNA 登录号
	Protein.Domains.Source	蛋白结构域-注释来源
	Protein.Domains.Accession	蛋白结构域-登录号
	Protein.Domains.Description	蛋白结构域-描述
	Test1_expression	Test1 样品表达量
	Con_expression.	Con 样品表达量

## Sheet: mRNA  FC>1.5
probe_set	Test1_average	Con_average	FC	Regulation	Gene.Symbol	Description	biotype	Chromosome	Strand	Public.Gene.IDs	Start	Stop	total_probes	Cytoband	Entrez.ID	mRNA.Accession	mRNA.Source	mRNA.Description	mRNA.SeqName	mRNA.Assignment.Score	mRNA.Assignment.Coverage	mRNA.Direct.Probes	mRNA.Possible.Probes	SwissProt.mRNA.Accession	SwissProt.Accession	UniGene.Accession	UniGene.ID	UniGene.Expression.Information	GO.Biological.Process.Accession	GO.Biological.Process.ID	GO.Biological.Process.Term	GO.Biological.Process.Evidence	GO.Cellular.Component.Accession	GO.Cellular.Component.ID	GO.Cellular.Component.Term	GO.Cellular.Component.Evidence	GO.Melecular.Function.Accession	GO.Molecular.Function.ID	GO.Molecular.Function.Term	GO.Molecular.Function.Evidence	Pathway.Accession	Pathway.Source	Pathway.Name	Protein.Domains.mRNA.Accession	Protein.Domains.Source	Protein.Domains.Accession	Protein.Domains.Description	Test1_expression	Con_expression
TC0100006441.hg.1	3.67043	3.0635	1.52301	up	FO538757.2	Protein LOC102725121 [gene_biotype:protein_coding transcript_biotype:protein_coding]	coding	chr1	+	ENST00000624431	182393	184158	10	NA	NA	ENST00000624431	ENSEMBL	Protein LOC102725121 [gene_biotype:protein_coding transcript_biotype:protein_coding]	chr1	100	100	0	NA	ENST00000624431	A0A096LP88	NA	NA	NA	NA	NA	NA	NA	NA	NA	NA	NA	NA	NA	NA	NA	NA	NA	NA	NA	NA	NA	NA	3.67043	3.0635
TC0100006483.hg.1	5.82071	5.07389	1.67809	up	ISG15	ISG15 ubiquitin-like modifier	coding	chr1	+	NM_005101	1001138	1014541	10	1p36.33	9636	NM_005101	RefSeq	Homo sapiens ISG15 ubiquitin-like modifier (ISG15), mRNA.	chr1	100	100	0	NA	NM_005101	P05161	NM_005101	Hs.458485	adrenal gland| ascites| blood| bone| brain| cervix| connective tissue| embryonic tissue| esophagus| eye| heart| intestine| kidney| larynx| liver| lung| lymph| mammary gland| mouth| ovary| pancreas| placenta| prostate| salivary gland| skin| testis| thymus| uterus| breast (mammary gland) tumor| cervical tumor| chondrosarcoma| colorectal tumor| esophageal tumor| gastrointestinal tumor| germ cell tum…	NM_005101	GO:0006281	DNA repair	traceable author statement	NM_005101	GO:0005576	extracellular region	inferred from direct assay	NM_005101	GO:0005515	protein binding	inferred from physical interaction	NA	NA	NA	ENST00000379389	Pfam	IPR000626	Ubiquitin domain	5.82071	5.07389
TC0100006683.hg.1	5.17549	4.15511	2.02845	up	HES3	hes family bHLH transcription factor 3	coding	chr1	+	NM_001024598	6244192	6245578	10	1p36.31	390992	NM_001024598	RefSeq	Homo sapiens hes family bHLH transcription factor 3 (HES3), mRNA.	chr1	100	100	0	NA	NM_001024598	Q5TGS1	NM_001024598	Hs.532677	embryonic tissue| normal| blastocyst	NM_001024598	GO:0000122	negative regulation of transcription from RNA polymerase II promoter	inferred from electronic annotation	NM_001024598	GO:0005634	nucleus	inferred from electronic annotation	NM_001024598	GO:0003677	DNA binding	inferred from electronic annotation	NA	NA	NA	ENST00000377898	Pfam	IPR011598	Myc-type, basic helix-loop-helix (bHLH) domain	5.17549	4.15511
TC0100006806.hg.1	5.56654	6.54956	-1.9766	down	UBE4B	ubiquitination factor E4B	coding	chr1	+	NM_001105562	10032832	10181239	10	1p36.3	10277	NM_001105562	RefSeq	Homo sapiens ubiquitination factor E4B (UBE4B), transcript variant 1, mRNA.	chr1	100	100	0	NA	NM_001105562	O95155	NM_001105562	Hs.593974	adrenal gland| ascites| bladder| blood| bone| bone marrow| brain| cervix| connective tissue| ear| embryonic tissue| esophagus| eye| heart| intestine| kidney| larynx| liver| lung| lymph node| mammary gland| mouth| muscle| nerve| ovary| pancreas| parathyroid| pharynx| placenta| prostate| skin| spleen| stomach| testis| thymus| thyroid| uterus| vascular|adrenal tumor| bladder carcinoma| breast (mamma…	NM_001105562	GO:0008626	granzyme-mediated apoptotic signaling pathway	inferred from direct assay	NM_001105562	GO:0000151	ubiquitin ligase complex	traceable author statement	NM_001105562	GO:0016874	ligase activity	inferred from electronic annotation	NA	NA	NA	ENST00000253251	Pfam	IPR003613	U box domain	5.56654	6.54956
TC0100006880.hg.1	4.25781	3.58243	1.59702	up	TNFRSF8	tumor necrosis factor receptor superfamily, member 8	coding	chr1	+	NM_001243	12063377	12144207	10	1p36	943	NM_001243	RefSeq	Homo sapiens tumor necrosis factor receptor superfamily, member 8 (TNFRSF8), transcript variant 1, mRNA.	chr1	100	100	0	NA	NM_001243	P28908	NM_001243	Hs.1314	blood| embryonic tissue| intestine| lung| lymph node| salivary gland| testis| uterus| germ cell tumor| leukemia| lung tumor| lymphoma| normal| blastocyst| juvenile| adult	NM_001243	GO:0006954	inflammatory response	not recorded	NM_001243	GO:0005737	cytoplasm	inferred from electronic annotation	NM_001243	GO:0004888	transmembrane signaling receptor activity	traceable author statement	NA	NA	NA	ENST00000263932	Pfam	IPR001368	TNFR/NGFR cysteine-rich region	4.25781	3.58243
TC0100006989.hg.1	4.34057	5.00941	-1.5898	down	DNAJC16	DnaJ (Hsp40) homolog, subfamily C, member 16	coding	chr1	+	NM_001287811	15526813	15592379	10	1p36.1	23341	NM_001287811	RefSeq	Homo sapiens DnaJ (Hsp40) homolog, subfamily C, member 16 (DNAJC16), transcript variant 2, mRNA.	chr1	100	100	0	NA	NM_001287811	Q9Y2G8	NM_001287811	Hs.655410	ascites| blood| bone marrow| brain| connective tissue| embryonic tissue| eye| heart| intestine| kidney| liver| lung| lymph node| mouth| muscle| nerve| ovary| pancreas| pharynx| pituitary gland| placenta| prostate| skin| spleen| testis| thymus| thyroid| trachea| uterus| chondrosarcoma| colorectal tumor| gastrointestinal tumor| germ cell tumor| glioma| head and neck tumor| leukemia| lymphoma| non-n…	NM_001287811	GO:0045454	cell redox homeostasis	inferred from electronic annotation	NM_001287811	GO:0005623	cell	inferred from electronic annotation	NA	NA	NA	NA	NA	NA	NA	ENST00000375838	Pfam	IPR001623	DnaJ domain	4.34057	5.00941
TC0100007063.hg.1	4.7583	3.80402	1.9376	up	FAM231C	family with sequence similarity 231, member C	coding	chr1	+	NM_001310138	16673003	16673657	10	1p36.13	729587	NM_001310138	RefSeq	Homo sapiens family with sequence similarity 231, member C (FAM231C), mRNA.	chr1	100	100	0	NA	NM_001310138	P0DMU4	NA	NA	NA	NA	NA	NA	NA	NA	NA	NA	NA	NA	NA	NA	NA	NA	NA	NA	NA	NA	NA	NA	4.7583	3.80402
TC0100007205.hg.1	3.51201	2.7967	1.64183	up	FAM43B	family with sequence similarity 43, member B	coding	chr1	+	NM_207334	20552439	20555020	10	1p36.12	163933	NM_207334	RefSeq	Homo sapiens family with sequence similarity 43, member B (FAM43B), mRNA.	chr1	100	100	0	NA	NM_207334	Q6ZT52	NM_207334	Hs.429179	adrenal gland| bone| brain| kidney| lung| uterus| lung tumor| normal| primitive neuroectodermal tumor of the CNS| soft tissue/muscle tissue tumor| fetus| adult	NA	NA	NA	NA	NA	NA	NA	NA	ENST00000332947	GO:0005515	protein binding	inferred from electronic annotation	NA	NA	NA	ENST00000332947	Pfam	IPR006020	PTB/PI domain	3.51201	2.7967
TC0100007283.hg.1	2.91006	3.55544	-1.56415	down	ZBTB40	zinc finger and BTB domain containing 40	coding	chr1	+	NM_001083621	22451851	22531157	10	1p36	9923	NM_001083621	RefSeq	Homo sapiens zinc finger and BTB domain containing 40 (ZBTB40), transcript variant 1, mRNA.	chr1	100	100	0	NA	NM_001083621	Q9NUA8	NM_001083621	Hs.418966	ascites| blood| bone| brain| connective tissue| embryonic tissue| eye| heart| intestine| kidney| larynx| liver| lung| lymph node| mouth| muscle| nerve| ovary| pancreas| parathyroid| placenta| prostate| skin| spleen| stomach| testis| thymus| tonsil| trachea| uterus| bladder carcinoma| chondrosarcoma| colorectal tumor| gastrointestinal tumor| germ cell tumor| glioma| head and neck tumor| kidney tum…	NM_001083621	GO:0006351	transcription, DNA-templated	inferred from electronic annotation	NM_001083621	GO:0005634	nucleus	inferred from direct assay	NM_001083621	GO:0003677	DNA binding	inferred from electronic annotation	NA	NA	NA	ENST00000374651	Pfam	IPR000210	BTB/POZ domain	2.91006	3.55544
TC0100007344.hg.1	5.83692	6.48183	-1.56365	down	PNRC2	proline-rich nuclear receptor coactivator 2	coding	chr1	+	NM_017761	23959109	23963462	10	1p36.11	55629	NM_017761	RefSeq	Homo sapiens proline-rich nuclear receptor coactivator 2 (PNRC2), mRNA.	chr1	100	100	0	NA	NM_017761	Q9NPJ4	NM_017761	Hs.7862	adipose tissue| ascites| bladder| blood| brain| connective tissue| embryonic tissue| intestine| kidney| liver| lung| placenta| prostate| skin| spleen| stomach| testis| thymus| thyroid| tonsil| uterus| vascular| chondrosarcoma| colorectal tumor| gastrointestinal tumor| germ cell tumor| glioma| head and neck tumor| kidney tumor| liver tumor| normal| primitive neuroectodermal tumor of the CNS| prost…	NA	NA	NA	NA	NM_017761	GO:0000932	cytoplasmic mRNA processing body	inferred from direct assay	NM_017761	GO:0005515	protein binding	inferred from physical interaction	NA	NA	NA	NA	NA	NA	NA	5.83692	6.48183
TC0100007378.hg.1	7.66622	8.28793	-1.5387	down	CLIC4	chloride intracellular channel 4	coding	chr1	+	NM_013943	24745269	24844324	10	1p36.11	25932	NM_013943	RefSeq	Homo sapiens chloride intracellular channel 4 (CLIC4), mRNA.	chr1	100	100	0	NA	NM_013943	Q9Y696	NM_013943	Hs.440544	adipose tissue| adrenal gland| ascites| bladder| blood| bone| bone marrow| brain| cervix| connective tissue| ear| embryonic tissue| eye| heart| intestine| kidney| liver| lung| lymph| lymph node| mammary gland| mouth| muscle| nerve| ovary| pancreas| parathyroid| placenta| prostate| salivary gland| skin| spleen| stomach| testis| thymus| thyroid| trachea| umbilical cord| uterus| vascular|adrenal tum…	NM_013943	GO:0001525	angiogenesis	not recorded	NM_013943	GO:0005622	intracellular	inferred from direct assay	NM_013943	GO:0004364	glutathione transferase activity	not recorded	NA	NA	NA	ENST00000374379	Pfam	IPR004045	Glutathione S-transferase, N-terminal	7.66622	8.28793
TC0100007403.hg.1	2.81715	3.53344	-1.64294	down	TMEM57	transmembrane protein 57	coding	chr1	+	NM_001282564	25430858	25500209	10	1p36.11|1p36.11	55219	NM_001282564	RefSeq	Homo sapiens transmembrane protein 57 (TMEM57), transcript variant 2, mRNA.	chr1	100	100	0	NA	NM_001282564	Q8N5G2	NM_001282564	Hs.189782	adrenal gland| ascites| blood| bone| bone marrow| brain| cervix| embryonic tissue| eye| heart| intestine| kidney| larynx| liver| lung| lymph node| mammary gland| mouth| muscle| nerve| pancreas| placenta| prostate| skin| testis| thymus| trachea| uterus|adrenal tumor| breast (mammary gland) tumor| cervical tumor| chondrosarcoma| colorectal tumor| gastrointestinal tumor| germ cell tumor| glioma| hea…	NM_001282564	GO:0007420	brain development	inferred from electronic annotation	NM_001282564	GO:0005634	nucleus	inferred from sequence or structural similarity	NM_001282564	GO:0003674	molecular_function	no biological data available	NA	NA	NA	ENST00000374343	Pfam	IPR019130	Macoilin	2.81715	3.53344
TC0100007451.hg.1	2.09849	2.78943	-1.61434	down	CD52	CD52 molecule	coding	chr1	+	NM_001803	26317920	26320523	10	1p36	1043	NM_001803	RefSeq	Homo sapiens CD52 molecule (CD52), mRNA.	chr1	100	100	0	NA	NM_001803	P31358	NM_001803	Hs.276770	adrenal gland| blood| bone marrow| brain| connective tissue| eye| heart| intestine| kidney| lung| lymph| lymph node| mammary gland| muscle| pancreas| pharynx| placenta| prostate| spleen| testis| thymus| tonsil| vascular|adrenal tumor| leukemia| lymphoma| normal| pancreatic tumor| soft tissue/muscle tissue tumor| fetus| juvenile| adult	NM_001803	GO:0007204	positive regulation of cytosolic calcium ion concentration	inferred from direct assay	NM_001803	GO:0005829	cytosol	inferred from direct assay	NA	NA	NA	NA	NA	NA	NA	ENST00000374213	Pfam	IPR026643	CAMPATH-1 antigen (CD52)	2.09849	2.78943
TC0100007529.hg.1	3.20679	4.0501	-1.79416	down	FAM76A	family with sequence similarity 76, member A	coding	chr1	+	NM_001143912	27725979	27763122	10	1p35.3	199870	NM_001143912	RefSeq	Homo sapiens family with sequence similarity 76, member A (FAM76A), transcript variant 1, mRNA.	chr1	100	100	0	NA	NM_001143912	Q8TAV0	NM_001143912	Hs.469359	adrenal gland| bladder| blood| bone| bone marrow| brain| connective tissue| embryonic tissue| esophagus| eye| heart| intestine| kidney| liver| lung| lymph node| mammary gland| muscle| parathyroid| placenta| prostate| skin| stomach| testis| uterus| vascular|adrenal tumor| breast (mammary gland) tumor| chondrosarcoma| colorectal tumor| esophageal tumor| germ cell tumor| glioma| kidney tumor| leukem…	ENST00000010299	GO:0000338	protein deneddylation	NA	ENST00000010299	GO:0005737	cytoplasm	NA	ENST00000010299	GO:0019784	NEDD8-specific protease activity	NA	NA	NA	NA	NA	NA	NA	NA	3.20679	4.0501
TC0100007562.hg.1	4.54504	5.37209	-1.77406	down	TRNAU1AP	tRNA selenocysteine 1 associated protein 1	coding	chr1	+	NM_017846	28553017	28578545	10	1p35.3	54952	NM_017846	RefSeq	Homo sapiens tRNA selenocysteine 1 associated protein 1 (TRNAU1AP), transcript variant 1, mRNA.	chr1	100	100	0	NA	NM_017846	Q9NX07	NM_017846	Hs.533626	ascites| bladder| blood| bone marrow| brain| cervix| connective tissue| ear| embryonic tissue| esophagus| eye| heart| intestine| kidney| larynx| liver| lung| lymph| lymph node| mammary gland| mouth| muscle| ovary| pancreas| pharynx| placenta| prostate| skin| spleen| stomach| testis| thymus| thyroid| uterus| bladder carcinoma| chondrosarcoma| colorectal tumor| esophageal tumor| gastrointestinal tu…	NM_017846	GO:0001514	selenocysteine incorporation	inferred from sequence or structural similarity	NM_017846	GO:0005634	nucleus	inferred from sequence or structural similarity	NM_017846	GO:0000166	nucleotide binding	inferred from electronic annotation	NA	NA	NA	ENST00000373830	Pfam	IPR000504	RNA recognition motif domain	4.54504	5.37209
TC0100007564.hg.1	3.76596	3.12329	1.56121	up	RAB42	RAB42, member RAS oncogene family	coding	chr1	+	NM_001193532	28592200	28595443	10	1p35.3	115273	NM_001193532	RefSeq	Homo sapiens RAB42, member RAS oncogene family (RAB42), transcript variant 1, mRNA.	chr1	100	100	0	NA	NM_001193532	Q8N4Z0	NM_001193532	Hs.652321	brain| embryonic tissue| kidney| salivary gland| skin| head and neck tumor| kidney tumor| normal| skin tumor| fetus| adult	NM_001193532	GO:0006886	intracellular protein transport	not recorded	NM_001193532	GO:0005794	Golgi apparatus	not recorded	NM_001193532	GO:0003924	GTPase activity	not recorded	NA	NA	NA	ENST00000373826	Pfam	IPR001806	Small GTPase superfamily	3.76596	3.12329
TC0100007662.hg.1	6.48242	7.09993	-1.53422	down	KPNA6	karyopherin alpha 6 (importin alpha 7)	coding	chr1	+	NM_012316	32108038	32176568	10	1p35.1	23633	NM_012316	RefSeq	Homo sapiens karyopherin alpha 6 (importin alpha 7) (KPNA6), mRNA.	chr1	100	100	0	NA	NM_012316	O60684	NM_012316	Hs.470588	adrenal gland| ascites| bladder| blood| bone| bone marrow| brain| cervix| connective tissue| ear| embryonic tissue| eye| heart| intestine| kidney| larynx| liver| lung| lymph| lymph node| mammary gland| mouth| muscle| nerve| ovary| pancreas| parathyroid| pharynx| pituitary gland| placenta| prostate| skin| spleen| stomach| testis| thymus| thyroid| trachea| umbilical cord| uterus| vascular|adrenal t…	NM_012316	GO:0006607	NLS-bearing protein import into nucleus	traceable author statement	NM_012316	GO:0005643	nuclear pore	not recorded	NM_012316	GO:0005515	protein binding	inferred from physical interaction	NA	NA	NA	ENST00000373625	Pfam	IPR000225	Armadillo	6.48242	7.09993
TC0100007672.hg.1	6.98693	7.97223	-1.97973	down	EIF3I	eukaryotic translation initiation factor 3, subunit I	coding	chr1	+	NM_003757	32221584	32231604	10	1p34.1	8668	NM_003757	RefSeq	Homo sapiens eukaryotic translation initiation factor 3, subunit I (EIF3I), mRNA.	chr1	100	100	0	NA	NM_003757	Q13347	NM_003757	Hs.530096	adipose tissue| adrenal gland| ascites| bladder| blood| bone| bone marrow| brain| cervix| connective tissue| embryonic tissue| eye| heart| intestine| kidney| larynx| liver| lung| lymph| lymph node| mammary gland| mouth| muscle| nerve| ovary| pancreas| parathyroid| pharynx| pituitary gland| placenta| prostate| salivary gland| skin| spleen| stomach| testis| thymus| thyroid| tonsil| umbilical cord| …	NM_003757	GO:0001731	formation of translation preinitiation complex	inferred from electronic annotation	NM_003757	GO:0005829	cytosol	traceable author statement	NM_003757	GO:0003743	translation initiation factor activity	inferred by curator	NM_003757	GenMAPP	Translation_Factors	ENST00000355082	Pfam	IPR001680	WD40 repeat	6.98693	7.97223
TC0100007676.hg.1	3.0702	2.44389	1.54361	up	LCK	LCK proto-oncogene, Src family tyrosine kinase	coding	chr1	+	NM_001042771	32251239	32286167	10	1p34.3	3932	NM_001042771	RefSeq	Homo sapiens LCK proto-oncogene, Src family tyrosine kinase (LCK), transcript variant 1, mRNA.	chr1	100	100	0	NA	NM_001042771	P06239	NM_001042771	Hs.470627	adrenal gland| blood| brain| connective tissue| embryonic tissue| esophagus| heart| intestine| larynx| liver| lung| lymph| lymph node| mammary gland| mouth| ovary| pancreas| prostate| spleen| stomach| testis| thymus| tonsil| uterus| vascular| breast (mammary gland) tumor| colorectal tumor| esophageal tumor| gastrointestinal tumor| germ cell tumor| glioma| head and neck tumor| leukemia| liver tumo…	NA	NA	NA	NA	NA	NA	NA	NA	NA	NA	NA	NA	NM_001042771	GenMAPP	Inflammatory_Response_Pathway	ENST00000333070	Pfam	IPR000980	SH2 domain	3.0702	2.44389
TC0100007786.hg.1	3.03618	3.90527	-1.8265	down	AGO1	argonaute RISC catalytic component 1	coding	chr1	+	NM_012199	35869808	35929610	10	1p34.3	26523	NM_012199	RefSeq	Homo sapiens argonaute RISC catalytic component 1 (AGO1), mRNA.	chr1	100	100	0	NA	NM_012199	Q9UL18	NM_012199	Hs.22867	adrenal gland| ascites| blood| bone| bone marrow| brain| cervix| connective tissue| ear| embryonic tissue| eye| heart| intestine| kidney| liver| lung| lymph| lymph node| mammary gland| muscle| ovary| pancreas| placenta| prostate| skin| spleen| stomach| testis| thymus| thyroid| uterus| breast (mammary gland) tumor| cervical tumor| chondrosarcoma| colorectal tumor| gastrointestinal tumor| germ cell…	NM_012199	GO:0000956	nuclear-transcribed mRNA catabolic process	inferred from direct assay	NM_012199	GO:0000932	cytoplasmic mRNA processing body	inferred from electronic annotation	NM_012199	GO:0000978	RNA polymerase II core promoter proximal region sequence-specific DNA binding	inferred from electronic annotation	NA	NA	NA	ENST00000373204	Pfam	IPR003100	PAZ domain	3.03618	3.90527
TC0100007798.hg.1	5.96333	7.30505	-2.53453	down	THRAP3	thyroid hormone receptor associated protein 3	coding	chr1	+	NM_005119	36224416	36305357	10	1p34.3	9967	NM_005119	RefSeq	Homo sapiens thyroid hormone receptor associated protein 3 (THRAP3), mRNA.	chr1	100	100	0	NA	NM_005119	Q9Y2W1	NM_005119	Hs.744057	adipose tissue| adrenal gland| bladder| blood| bone| bone marrow| brain| cervix| connective tissue| embryonic tissue| esophagus| eye| heart| intestine| kidney| larynx| liver| lung| lymph| lymph node| mammary gland| mouth| muscle| nerve| ovary| pancreas| pharynx| placenta| prostate| skin| stomach| testis| thyroid| trachea| uterus| vascular|adrenal tumor| bladder carcinoma| breast (mammary gland) t…	NM_005119	GO:0000381	regulation of alternative mRNA splicing, via spliceosome	inferred from mutant phenotype	NM_005119	GO:0005634	nucleus	inferred from direct assay	NM_005119	GO:0001046	core promoter sequence-specific DNA binding	inferred from sequence or structural similarity	NA	NA	NA	ENST00000354618	Pfam	IPR029199	THRAP3/BCLAF1 family	5.96333	7.30505
TC0100007841.hg.1	5.08629	5.97832	-1.85578	down	CDCA8	cell division cycle associated 8	coding	chr1	+	NM_001256875	37692401	37709719	10	1p34.3	55143	NM_001256875	RefSeq	Homo sapiens cell division cycle associated 8 (CDCA8), transcript variant 1, mRNA.	chr1	100	100	0	NA	NM_001256875	Q53HL2	NM_001256875	Hs.524571	adrenal gland| ascites| bladder| blood| bone| bone marrow| brain| cervix| connective tissue| embryonic tissue| esophagus| eye| heart| intestine| kidney| liver| lung| lymph| lymph node| mammary gland| mouth| muscle| ovary| pancreas| pharynx| placenta| prostate| salivary gland| skin| spleen| stomach| testis| thymus| thyroid| uterus| vascular|adrenal tumor| breast (mammary gland) tumor| cervical tum…	NM_001256875	GO:0000278	mitotic cell cycle	traceable author statement	NM_001256875	GO:0000775	chromosome, centromeric region	inferred from direct assay	NM_001256875	GO:0005515	protein binding	inferred from physical interaction	NA	NA	NA	ENST00000327331	Pfam	IPR018851	Borealin, N-terminal	5.08629	5.97832
TC0100007949.hg.1	5.98679	5.34172	1.56381	up	ZMPSTE24	zinc metallopeptidase STE24	coding	chr1	+	NM_005857	40258050	40294184	10	1p34	10269	NM_005857	RefSeq	Homo sapiens zinc metallopeptidase STE24 (ZMPSTE24), mRNA.	chr1	100	100	0	NA	NM_005857	O75844	NM_005857	Hs.132642	adipose tissue| ascites| bladder| blood| bone| bone marrow| brain| cervix| connective tissue| embryonic tissue| esophagus| eye| heart| intestine| kidney| liver| lung| lymph| lymph node| mammary gland| mouth| muscle| ovary| pancreas| parathyroid| placenta| prostate| skin| spleen| testis| thymus| thyroid| trachea| uterus| vascular| bladder carcinoma| breast (mammary gland) tumor| cervical tumor| ch…	NM_005857	GO:0006508	proteolysis	traceable author statement	NM_005857	GO:0005637	nuclear inner membrane	inferred from electronic annotation	NM_005857	GO:0004222	metalloendopeptidase activity	inferred from electronic annotation	NA	NA	NA	ENST00000372759	Pfam	IPR001915	Peptidase M48	5.98679	5.34172
TC0100007968.hg.1	4.27152	5.00965	-1.66801	down	NFYC	nuclear transcription factor Y subunit gamma	coding	chr1	+	NM_001142587	40691570	40771606	10	1p32	4802	NM_001142587	RefSeq	Homo sapiens nuclear transcription factor Y, gamma (NFYC), transcript variant 3, mRNA.	chr1	100	100	0	NA	NM_001142587	Q13952	NA	NA	NA	NA	NA	NA	NA	NA	NA	NA	NA	NA	NA	NA	NA	NA	NA	NA	ENST00000308733	Pfam	IPR003958	Transcription factor CBF/NF-Y/archaeal histone domain	4.27152	5.00965
TC0100007980.hg.1	3.36343	4.28237	-1.89072	down	CTPS1	CTP synthase 1	coding	chr1	+	NM_001301237	40979299	41012565	10	1p34.1	1503	NM_001301237	RefSeq	Homo sapiens CTP synthase 1 (CTPS1), transcript variant 2, mRNA.	chr1	100	100	0	NA	NM_001301237	P17812	NM_001301237	Hs.473087	adrenal gland| ascites| blood| bone| bone marrow| brain| cervix| connective tissue| embryonic tissue| esophagus| eye| heart| intestine| kidney| liver| lung| lymph| lymph node| mammary gland| mouth| muscle| nerve| ovary| pancreas| parathyroid| pharynx| pituitary gland| placenta| prostate| salivary gland| skin| spleen| stomach| testis| thymus| thyroid| umbilical cord| uterus| vascular| bladder carc…	NA	NA	NA	NA	NM_001301237	GO:0005829	cytosol	traceable author statement	NM_001301237	GO:0003883	CTP synthase activity	not recorded	NM_001905	HumanCyc	PWY-5687	ENST00000372616	Pfam	IPR017456	CTP synthase, N-terminal	3.36343	4.28237
TC0100007991.hg.1	5.48749	4.68187	1.7479	up	FOXO6	forkhead box O6	coding	chr1	+	NM_001291281	41361922	41383591	10	1p34.2	100132074	NM_001291281	RefSeq	Homo sapiens forkhead box O6 (FOXO6), mRNA.	chr1	100	100	0	NA	ENST00000372591	A6NCE0	NA	NA	NA	NM_001291281	GO:0006351	transcription, DNA-templated	inferred from electronic annotation	NM_001291281	GO:0005634	nucleus	not recorded	NM_001291281	GO:0000981	RNA polymerase II transcription factor activity, sequence-specific DNA binding	not recorded	NA	NA	NA	OTTHUMT00000015642	Pfam	IPR001766	Fork head domain	5.48749	4.68187
TC0100008073.hg.1	1.39882	2.75039	-2.5519	down	KDM4A	lysine (K)-specific demethylase 4A	coding	chr1	+	NM_014663	43650126	43705518	10	1p34.1	9682	NM_014663	RefSeq	Homo sapiens lysine (K)-specific demethylase 4A (KDM4A), mRNA.	chr1	100	100	0	NA	NM_014663	O75164	NM_014663	Hs.155983	adipose tissue| adrenal gland| ascites| bladder| blood| brain| cervix| connective tissue| embryonic tissue| eye| heart| intestine| kidney| liver| lung| lymph| lymph node| mammary gland| muscle| ovary| pancreas| placenta| prostate| salivary gland| skin| spleen| testis| thyroid| umbilical cord| uterus| bladder carcinoma| breast (mammary gland) tumor| cervical tumor| chondrosarcoma| colorectal tumor…	NM_014663	GO:0006281	DNA repair	traceable author statement	NM_014663	GO:0005634	nucleus	inferred from direct assay	NM_014663	GO:0005515	protein binding	inferred from physical interaction	NA	NA	NA	ENST00000372396	Pfam	IPR003347	JmjC domain	1.39882	2.75039
TC0100008101.hg.1	4.21719	6.32763	-4.31823	down	KIF2C	kinesin family member 2C	coding	chr1	+	NM_001297655	44739818	44767767	10	1p34.1	11004	NM_001297655	RefSeq	Homo sapiens kinesin family member 2C (KIF2C), transcript variant 2, mRNA.	chr1	100	100	0	NA	NM_001297655	Q99661	NM_001297655	Hs.720061	ascites| bladder| blood| bone| bone marrow| brain| cervix| connective tissue| embryonic tissue| esophagus| eye| heart| intestine| kidney| larynx| liver| lung| lymph| lymph node| mammary gland| mouth| muscle| ovary| pituitary gland| placenta| prostate| skin| stomach| testis| thymus| uterus| vascular| breast (mammary gland) tumor| cervical tumor| chondrosarcoma| colorectal tumor| esophageal tumor| …	NA	NA	NA	NA	NA	NA	NA	NA	NM_001297655	GO:0003777	microtubule motor activity	inferred from electronic annotation	NA	NA	NA	ENST00000372217	Pfam	IPR001752	Kinesin motor domain	4.21719	6.32763
TC0100008121.hg.1	3.85056	4.91123	-2.08591	down	TOE1	target of EGR1, member 1 (nuclear)	coding	chr1	+	NM_025077	45339670	45343978	10	1p33	114034	NM_025077	RefSeq	Homo sapiens target of EGR1, member 1 (nuclear) (TOE1), mRNA.	chr1	100	100	0	NA	NM_025077	Q96GM8	NM_025077	Hs.525091	adrenal gland| ascites| bladder| blood| bone| bone marrow| brain| cervix| connective tissue| ear| embryonic tissue| eye| heart| intestine| kidney| liver| lung| lymph| lymph node| mammary gland| muscle| ovary| pancreas| parathyroid| placenta| prostate| skin| spleen| stomach| testis| thymus| thyroid| tonsil| trachea| uterus| vascular|adrenal tumor| breast (mammary gland) tumor| cervical tumor| chon…	NM_025077	GO:0090503	RNA phosphodiester bond hydrolysis, exonucleolytic	inferred from direct assay	NM_025077	GO:0005634	nucleus	inferred from direct assay	NM_025077	GO:0000175	3'-5'-exoribonuclease activity	inferred from direct assay	NA	NA	NA	ENST00000372090	Pfam	IPR000571	Zinc finger, CCCH-type	3.85056	4.91123
TC0100008124.hg.1	4.04513	4.74773	-1.62743	down	MMACHC	methylmalonic aciduria (cobalamin deficiency) cblC type, with homocystinuria	coding	chr1	+	NM_015506	45500053	45513382	10	1p34.1	25974	NM_015506	RefSeq	Homo sapiens methylmalonic aciduria (cobalamin deficiency) cblC type, with homocystinuria (MMACHC), mRNA.	chr1	100	100	0	NA	NM_015506	Q9Y4U1	NM_015506	Hs.13024	bone| brain| eye| intestine| kidney| liver| lung| lymph| mammary gland| mouth| ovary| skin| spleen| testis| uterus| chondrosarcoma| colorectal tumor| germ cell tumor| head and neck tumor| liver tumor| lung tumor| lymphoma| non-neoplasia| normal| ovarian tumor| retinoblastoma| skin tumor| uterine tumor| fetus| adult	NM_015506	GO:0006766	vitamin metabolic process	traceable author statement	NM_015506	GO:0005739	mitochondrion	inferred from electronic annotation	NM_015506	GO:0005515	protein binding	inferred from physical interaction	NA	NA	NA	NA	NA	NA	NA	4.04513	4.74773
TC0100008127.hg.1	4.30448	4.96889	-1.58492	down	NASP	nuclear autoantigenic sperm protein (histone-binding)	coding	chr1	+	NM_001195193	45583846	45618906	10	1p34.1	4678	NM_001195193	RefSeq	Homo sapiens nuclear autoantigenic sperm protein (histone-binding) (NASP), transcript variant 4, mRNA.	chr1	100	100	0	NA	NM_001195193	P49321	NA	NA	NA	NA	NA	NA	NA	NM_001195193	GO:0000790	nuclear chromatin	inferred from direct assay	NM_001195193	GO:0005515	protein binding	inferred from physical interaction	NA	NA	NA	ENST00000350030	Pfam	IPR001440	Tetratricopeptide repeat 1	4.30448	4.96889
TC0100008216.hg.1	1.90738	2.84998	-1.92199	down	SLC5A9	solute carrier family 5 (sodium/sugar cotransporter), member 9	coding	chr1	+	NM_001011547	48222685	48248644	10	1p33	200010	NM_001011547	RefSeq	Homo sapiens solute carrier family 5 (sodium/sugar cotransporter), member 9 (SLC5A9), transcript variant 2, mRNA.	chr1	100	100	0	NA	NM_001011547	Q2M3M2	NM_001011547	Hs.37890	brain| embryonic tissue| eye| intestine| kidney| liver| pancreas| testis| uterus| liver tumor| normal| blastocyst| fetus| adult	NM_001011547	GO:0006814	sodium ion transport	inferred from electronic annotation	NM_001011547	GO:0005886	plasma membrane	traceable author statement	NM_001011547	GO:0005215	transporter activity	inferred from electronic annotation	NA	NA	NA	ENST00000236495	Pfam	IPR001734	Sodium/solute symporter	1.90738	2.84998
TC0100008271.hg.1	4.84869	5.75123	-1.86934	down	RNF11	ring finger protein 11	coding	chr1	+	NM_014372	51236271	51273455	10	1p32	26994	NM_014372	RefSeq	Homo sapiens ring finger protein 11 (RNF11), mRNA.	chr1	100	100	0	NA	NM_014372	Q9Y3C5	NM_014372	Hs.309641	adipose tissue| adrenal gland| ascites| bladder| blood| bone| bone marrow| brain| cervix| connective tissue| ear| embryonic tissue| eye| heart| intestine| kidney| larynx| liver| lung| lymph node| mammary gland| mouth| muscle| nerve| ovary| pancreas| parathyroid| pituitary gland| placenta| prostate| salivary gland| skin| spleen| stomach| testis| thymus| thyroid| trachea| uterus| vascular|adrenal t…	NM_014372	GO:0042787	protein ubiquitination involved in ubiquitin-dependent protein catabolic process	inferred from direct assay	NM_014372	GO:0000151	ubiquitin ligase complex	inferred from direct assay	NM_014372	GO:0003677	DNA binding	traceable author statement	NA	NA	NA	ENST00000242719	Pfam	IPR001841	Zinc finger, RING-type	4.84869	5.75123
TC0100008315.hg.1	5.53941	6.12782	-1.50359	down	PRPF38A	pre-mRNA processing factor 38A	coding	chr1	+	NM_032864	52404547	52420839	10	1p32.3	84950	NM_032864	RefSeq	Homo sapiens pre-mRNA processing factor 38A (PRPF38A), mRNA.	chr1	100	100	0	NA	NM_032864	Q8NAV1	NM_032864	Hs.5301	ascites| bladder| blood| bone| bone marrow| brain| cervix| connective tissue| embryonic tissue| eye| heart| intestine| kidney| liver| lung| lymph| lymph node| mammary gland| mouth| muscle| ovary| pancreas| pharynx| placenta| prostate| skin| spleen| stomach| testis| thymus| thyroid| trachea| uterus| vascular| breast (mammary gland) tumor| cervical tumor| chondrosarcoma| gastrointestinal tumor| ger…	NM_032864	GO:0006397	mRNA processing	inferred from electronic annotation	NM_032864	GO:0005634	nucleus	inferred from direct assay	NM_032864	GO:0005515	protein binding	inferred from physical interaction	NA	NA	NA	ENST00000257181	Pfam	IPR005037	Pre-mRNA-splicing factor 38	5.53941	6.12782
TC0100008536.hg.1	1.47736	2.68278	-2.30605	down	INADL	InaD-like (Drosophila)	coding	chr1	+	NM_176877	61742477	62163920	10	1p31.3	10207	NM_176877	RefSeq	Homo sapiens InaD-like (Drosophila) (INADL), mRNA.	chr1	100	100	0	NA	NM_176877	Q8NI35	NM_176877	Hs.478125	adipose tissue| bladder| blood| brain| connective tissue| embryonic tissue| eye| intestine| kidney| larynx| liver| lung| mammary gland| mouth| muscle| ovary| pancreas| parathyroid| prostate| skin| testis| trachea| uterus| vascular| breast (mammary gland) tumor| chondrosarcoma| colorectal tumor| germ cell tumor| head and neck tumor| leukemia| liver tumor| non-neoplasia| normal| ovarian tumor| pros…	NM_176877	GO:0034329	cell junction assembly	traceable author statement	NM_176877	GO:0005886	plasma membrane	traceable author statement	NM_176877	GO:0005515	protein binding	inferred from physical interaction	NA	NA	NA	ENST00000307297	Pfam	IPR001478	PDZ domain	1.47736	2.68278
TC0100008554.hg.1	2.1307	2.71661	-1.50098	down	USP1	ubiquitin specific peptidase 1	coding	chr1	+	NM_001017415	62436297	62451804	10	1p31.3	7398	NM_001017415	RefSeq	Homo sapiens ubiquitin specific peptidase 1 (USP1), transcript variant 2, mRNA.	chr1	100	100	0	NA	NM_001017415	O94782	NM_001017415	Hs.35086	adrenal gland| ascites| bladder| blood| bone| bone marrow| brain| cervix| connective tissue| embryonic tissue| esophagus| eye| heart| intestine| kidney| liver| lung| lymph| lymph node| mammary gland| mouth| muscle| nerve| ovary| pancreas| pharynx| placenta| prostate| skin| spleen| stomach| testis| thymus| thyroid| tonsil| trachea| uterus| vascular|adrenal tumor| bladder carcinoma| breast (mammary…	NM_001017415	GO:0001501	skeletal system development	inferred from electronic annotation	NM_001017415	GO:0005634	nucleus	inferred from direct assay	NM_001017415	GO:0004197	cysteine-type endopeptidase activity	traceable author statement	NA	NA	NA	ENST00000339950	Pfam	IPR001394	Peptidase C19, ubiquitin carboxyl-terminal hydrolase	2.1307	2.71661
TC0100008594.hg.1	4.34009	3.58116	1.69223	up	ROR1	receptor tyrosine kinase-like orphan receptor 1	coding	chr1	+	NM_001083592	63774019	64181498	10	1p31.3	4919	NM_001083592	RefSeq	Homo sapiens receptor tyrosine kinase-like orphan receptor 1 (ROR1), transcript variant 2, mRNA.	chr1	100	100	0	NA	NM_001083592	Q01973	NM_001083592	Hs.128753	adipose tissue| blood| bone| brain| connective tissue| ear| embryonic tissue| eye| heart| intestine| kidney| larynx| lung| lymph node| mammary gland| muscle| nerve| ovary| pancreas| placenta| prostate| skin| stomach| testis| thyroid| vascular| chondrosarcoma| colorectal tumor| gastrointestinal tumor| germ cell tumor| glioma| head and neck tumor| kidney tumor| leukemia| lung tumor| normal| ovarian…	NM_001083592	GO:0007169	transmembrane receptor protein tyrosine kinase signaling pathway	inferred from electronic annotation	NM_001083592	GO:0005737	cytoplasm	traceable author statement	NM_001083592	GO:0004714	transmembrane receptor protein tyrosine kinase activity	traceable author statement	NM_001083592	GenMAPP	Nuclear_Receptors	ENST00000371079	Pfam	IPR000001	Kringle	4.34009	3.58116
TC0100008618.hg.1	3.16296	4.15477	-1.98868	down	AK4	adenylate kinase 4	coding	chr1	+	NM_001005353	65147549	65232145	10	1p31.3	205	NM_001005353	RefSeq	Homo sapiens adenylate kinase 4 (AK4), transcript variant 1, mRNA.	chr1	100	100	0	NA	NM_001005353	P27144	NM_001005353	Hs.10862	adipose tissue| ascites| blood| bone| bone marrow| brain| cervix| connective tissue| ear| embryonic tissue| eye| heart| intestine| kidney| liver| lung| lymph| mammary gland| mouth| muscle| ovary| pancreas| placenta| prostate| salivary gland| skin| stomach| testis| trachea| uterus| vascular| bladder carcinoma| breast (mammary gland) tumor| cervical tumor| chondrosarcoma| colorectal tumor| gastroin…	NA	NA	NA	NA	NM_001005353	GO:0005739	mitochondrion	inferred from direct assay	NM_001005353	GO:0004017	adenylate kinase activity	inferred from direct assay	NM_013410	HumanCyc	P1-PWY	ENST00000327299	Pfam	IPR007862	Adenylate kinase, active site lid domain	3.16296	4.15477
TC0100008621.hg.1	2.15891	2.8655	-1.63195	down	LEPR	leptin receptor	coding	chr1	+	NM_001003679	65420448	65641615	10	1p31	3953	NM_001003679	RefSeq	Homo sapiens leptin receptor (LEPR), transcript variant 3, mRNA.	chr1	100	100	0	NA	NM_001003679	P48357	NM_001003679	Hs.723178	adipose tissue| adrenal gland| bone| bone marrow| brain| cervix| connective tissue| embryonic tissue| eye| heart| intestine| kidney| liver| lung| mouth| muscle| nerve| pancreas| placenta| prostate| skin| stomach| testis| thymus| trachea| uterus| vascular| cervical tumor| chondrosarcoma| gastrointestinal tumor| germ cell tumor| head and neck tumor| kidney tumor| leukemia| liver tumor| normal| panc…	NM_001003679	GO:0006112	energy reserve metabolic process	traceable author statement	NM_001003679	GO:0005576	extracellular region	inferred from electronic annotation	NM_001003679	GO:0004888	transmembrane signaling receptor activity	traceable author statement	NA	NA	NA	ENST00000344610	Pfam	IPR010457	Immunoglobulin C2-set-like, ligand-binding	2.15891	2.8655
TC0100008631.hg.1	4.15884	3.41908	1.6699	up	SGIP1	SH3-domain GRB2-like (endophilin) interacting protein 1	coding	chr1	+	NM_001308203	66533383	66751139	10	1p31.3	84251	NM_001308203	RefSeq	Homo sapiens SH3-domain GRB2-like (endophilin) interacting protein 1 (SGIP1), transcript variant 2, mRNA.	chr1	100	100	0	NA	NM_001308203	Q9BQI5	NM_001308203	Hs.132121	blood| brain| connective tissue| embryonic tissue| eye| intestine| kidney| larynx| liver| lung| muscle| nerve| ovary| pancreas| pituitary gland| skin| testis| thyroid| trachea| umbilical cord| uterus| vascular| chondrosarcoma| germ cell tumor| head and neck tumor| kidney tumor| leukemia| non-neoplasia| normal| pancreatic tumor| primitive neuroectodermal tumor of the CNS| retinoblastoma| soft tiss…	NM_001308203	GO:0006897	endocytosis	inferred from electronic annotation	NM_001308203	GO:0005737	cytoplasm	inferred from direct assay	NM_001308203	GO:0005515	protein binding	inferred from physical interaction	NA	NA	NA	ENST00000237247	Pfam	IPR018808	Muniscin C-terminal	4.15884	3.41908
TC0100008664.hg.1	5.17236	4.41195	1.69397	up	GADD45A	growth arrest and DNA-damage-inducible, alpha	coding	chr1	+	NM_001199741	67685061	67688338	10	1p31.2	1647	NM_001199741	RefSeq	Homo sapiens growth arrest and DNA-damage-inducible, alpha (GADD45A), transcript variant 2, mRNA.	chr1	100	100	0	NA	NM_001199741	P24522	NM_001199741	Hs.80409	bladder| blood| bone| brain| cervix| connective tissue| embryonic tissue| eye| intestine| kidney| liver| lung| lymph| lymph node| mammary gland| muscle| ovary| pancreas| parathyroid| pharynx| placenta| prostate| skin| stomach| testis| thymus| thyroid| umbilical cord| uterus| vascular| breast (mammary gland) tumor| chondrosarcoma| colorectal tumor| gastrointestinal tumor| germ cell tumor| glioma| …	NM_001199741	GO:0000079	regulation of cyclin-dependent protein serine/threonine kinase activity	traceable author statement	NM_001199741	GO:0005634	nucleus	inferred from direct assay	NM_001199741	GO:0001047	core promoter binding	inferred from electronic annotation	NM_001199741	GenMAPP	Cell_cycle_KEGG	ENST00000370985	Pfam	IPR004038	Ribosomal protein L7Ae/L30e/S12e/Gadd45	5.17236	4.41195
TC0100008797.hg.1	5.64841	6.47219	-1.77003	down	AK5	adenylate kinase 5	coding	chr1	+	NM_012093	77281977	77559969	10	1p31	26289	NM_012093	RefSeq	Homo sapiens adenylate kinase 5 (AK5), transcript variant 2, mRNA.	chr1	100	100	0	NA	NM_012093	Q9Y6K8	NM_012093	Hs.559718	adipose tissue| ascites| bone| bone marrow| brain| connective tissue| embryonic tissue| eye| intestine| kidney| liver| lung| mammary gland| placenta| stomach| testis| uterus| breast (mammary gland) tumor| chondrosarcoma| gastrointestinal tumor| germ cell tumor| glioma| kidney tumor| liver tumor| non-neoplasia| normal| primitive neuroectodermal tumor of the CNS| soft tissue/muscle tissue tumor| ut…	NA	NA	NA	NA	NM_012093	GO:0005737	cytoplasm	inferred from direct assay	NM_012093	GO:0004017	adenylate kinase activity	inferred from electronic annotation	NM_012093	HumanCyc	P1-PWY	OTTHUMT00000026993	Pfam	IPR007858	Dpy-30 motif	5.64841	6.47219
TC0100008807.hg.1	3.86182	4.81362	-1.93428	down	NEXN	nexilin (F actin binding protein)	coding	chr1	+	NM_001172309	77888513	77943895	10	1p31.1	91624	NM_001172309	RefSeq	Homo sapiens nexilin (F actin binding protein) (NEXN), transcript variant 2, mRNA.	chr1	100	100	0	NA	NM_001172309	Q0ZGT2	NM_001172309	Hs.612385	adrenal gland| blood| bone| bone marrow| brain| cervix| connective tissue| ear| embryonic tissue| esophagus| heart| intestine| kidney| liver| lung| mammary gland| mouth| muscle| ovary| placenta| prostate| skin| stomach| testis| thymus| thyroid| umbilical cord| uterus| vascular| breast (mammary gland) tumor| chondrosarcoma| gastrointestinal tumor| germ cell tumor| head and neck tumor| kidney tumor…	NM_001172309	GO:0006468	protein phosphorylation	not recorded	NM_001172309	GO:0005856	cytoskeleton	inferred from electronic annotation	NM_001172309	GO:0008307	structural constituent of muscle	inferred from mutant phenotype	NA	NA	NA	ENST00000330010	Pfam	IPR013098	Immunoglobulin I-set	3.86182	4.81362
TC0100008922.hg.1	1.84417	3.08288	-2.35987	down	CLCA1	chloride channel accessory 1	coding	chr1	+	NM_001285	86468368	86500291	10	1p22.3	1179	NM_001285	RefSeq	Homo sapiens chloride channel accessory 1 (CLCA1), mRNA.	chr1	100	100	0	NA	NM_001285	A8K7I4	NM_001285	Hs.194659	bladder| connective tissue| intestine| muscle| stomach| colorectal tumor| gastrointestinal tumor| non-neoplasia| normal| soft tissue/muscle tissue tumor| adult	NM_001285	GO:0006508	proteolysis	inferred from electronic annotation	NM_001285	GO:0005615	extracellular space	inferred from electronic annotation	NM_001285	GO:0005229	intracellular calcium activated chloride channel activity	not recorded	NA	NA	NA	ENST00000234701	Pfam	IPR013642	Chloride channel calcium-activated	1.84417	3.08288
TC0100009020.hg.1	1.61237	2.79643	-2.27216	down	CDC7	cell division cycle 7	coding	chr1	+	NM_001134419	91500847	91525764	10	1p22	8317	NM_001134419	RefSeq	Homo sapiens cell division cycle 7 (CDC7), transcript variant 2, mRNA.	chr1	100	100	0	NA	NM_001134419	O00311	NM_001134419	Hs.533573	adrenal gland| ascites| bladder| blood| bone marrow| brain| connective tissue| embryonic tissue| eye| heart| intestine| kidney| liver| lung| lymph node| mammary gland| mouth| placenta| prostate| skin| testis| thymus| thyroid| uterus|adrenal tumor| breast (mammary gland) tumor| chondrosarcoma| gastrointestinal tumor| germ cell tumor| glioma| head and neck tumor| kidney tumor| leukemia| lung tumor|…	NM_001134419	GO:0000082	G1/S transition of mitotic cell cycle	traceable author statement	NM_001134419	GO:0005634	nucleus	inferred from direct assay	NM_001134419	GO:0004672	protein kinase activity	inferred from mutant phenotype	NM_001134419	GenMAPP	Cell_cycle_KEGG	ENST00000234626	Pfam	IPR000719	Protein kinase domain	1.61237	2.79643
TC0100009056.hg.1	2.69622	1.39186	2.46974	up	CCDC18	coiled-coil domain containing 18	coding	chr1	+	NM_001306076	93179919	93278730	10	1p22.1	343099	NM_001306076	RefSeq	Homo sapiens coiled-coil domain containing 18 (CCDC18), transcript variant 1, mRNA.	chr1	100	100	0	NA	NM_001306076	Q5T9S5	NM_001306076	Hs.745125	blood| bone marrow| brain| connective tissue| embryonic tissue| kidney| larynx| liver| lung| lymph node| mammary gland| muscle| ovary| pituitary gland| placenta| salivary gland| testis| thymus| vascular| bladder carcinoma| breast (mammary gland) tumor| germ cell tumor| head and neck tumor| kidney tumor| leukemia| liver tumor| lymphoma| non-neoplasia| normal|embryoid body| blastocyst| fetus| juven…	NM_001306076	GO:0007099	centriole replication	not recorded	NM_001306076	GO:0005814	centriole	not recorded	NA	NA	NA	NA	NA	NA	NA	NA	NA	NA	NA	2.69622	1.39186
TC0100009097.hg.1	4.08319	5.65577	-2.97435	down	ABCD3	ATP binding cassette subfamily D member 3	coding	chr1	+	NM_001122674	94418377	94518666	10	1p21.3	5825	NM_001122674	RefSeq	Homo sapiens ATP-binding cassette, sub-family D (ALD), member 3 (ABCD3), transcript variant 2, mRNA.	chr1	100	100	0	NA	NM_001122674	P28288	NM_001122674	Hs.700576	adipose tissue| adrenal gland| ascites| bladder| blood| bone| bone marrow| brain| connective tissue| ear| embryonic tissue| esophagus| eye| heart| intestine| kidney| liver| lung| lymph| lymph node| mammary gland| mouth| muscle| ovary| pancreas| pharynx| pituitary gland| placenta| prostate| salivary gland| skin| spleen| testis| thymus| trachea| uterus| vascular|adrenal tumor| bladder carcinoma| br…	NM_001122674	GO:0006633	fatty acid biosynthetic process	inferred from mutant phenotype	NM_001122674	GO:0005743	mitochondrial inner membrane	inferred from electronic annotation	NM_001122674	GO:0005324	long-chain fatty acid transporter activity	inferred from electronic annotation	NA	NA	NA	ENST00000315713	Pfam	IPR011527	ABC transporter type 1, transmembrane domain	4.08319	5.65577
TC0100009221.hg.1	3.32807	2.73247	1.51109	up	VCAM1	vascular cell adhesion molecule 1	coding	chr1	+	NM_001078	100719640	100739046	10	1p32-p31	7412	NM_001078	RefSeq	Homo sapiens vascular cell adhesion molecule 1 (VCAM1), transcript variant 1, mRNA.	chr1	100	100	0	NA	NM_001078	P19320	NM_001078	Hs.109225	adipose tissue| adrenal gland| bladder| blood| brain| connective tissue| ear| embryonic tissue| esophagus| eye| heart| intestine| kidney| larynx| liver| lung| lymph node| mammary gland| mouth| pancreas| parathyroid| pharynx| pituitary gland| placenta| prostate| skin| spleen| stomach| testis| thymus| trachea| uterus| vascular|adrenal tumor| breast (mammary gland) tumor| chondrosarcoma| esophageal …	NA	NA	NA	NA	NM_001078	GO:0002102	podosome	inferred from direct assay	NM_001078	GO:0005178	integrin binding	inferred from direct assay	NA	NA	NA	ENST00000294728	Pfam	IPR008424	Immunoglobulin C2-set	3.32807	2.73247
TC0100009364.hg.1	6.41878	5.46564	1.93608	up	CSF1	colony stimulating factor 1 (macrophage)	coding	chr1	+	NM_000757	109910242	109930994	10	1p13.3	1435	NM_000757	RefSeq	Homo sapiens colony stimulating factor 1 (macrophage) (CSF1), transcript variant 1, mRNA.	chr1	100	100	0	NA	NM_000757	P09603	NM_000757	Hs.173894	ascites| blood| bone| brain| cervix| connective tissue| ear| eye| intestine| kidney| larynx| liver| lung| lymph node| mammary gland| mouth| muscle| nerve| ovary| pancreas| pharynx| placenta| skin| spleen| stomach| testis| thymus| trachea| uterus| breast (mammary gland) tumor| chondrosarcoma| gastrointestinal tumor| germ cell tumor| glioma| head and neck tumor| kidney tumor| leukemia| liver tumor|…	NA	NA	NA	NA	NM_000757	GO:0005615	extracellular space	inferred from direct assay	NM_000757	GO:0005125	cytokine activity	inferred from direct assay	NA	NA	NA	ENST00000329608	Pfam	IPR008001	Macrophage colony stimulating factor-1	6.41878	5.46564
TC0100009365.hg.1	5.19202	6.01403	-1.76786	down	AHCYL1	adenosylhomocysteinase like 1	coding	chr1	+	NM_001242673	109984686	110023742	10	1p13.2	10768	NM_001242673	RefSeq	Homo sapiens adenosylhomocysteinase-like 1 (AHCYL1), transcript variant 2, mRNA.	chr1	100	100	0	NA	NM_001242673	O43865	NM_001242673	Hs.743973	adipose tissue| adrenal gland| ascites| bladder| blood| bone| bone marrow| brain| cervix| connective tissue| ear| embryonic tissue| esophagus| eye| heart| intestine| kidney| larynx| liver| lung| lymph| lymph node| mammary gland| mouth| muscle| nerve| ovary| pancreas| pharynx| pituitary gland| placenta| prostate| salivary gland| skin| spleen| stomach| testis| thymus| thyroid| trachea| umbilical co…	NM_001242673	GO:0006378	mRNA polyadenylation	inferred from direct assay	NM_001242673	GO:0005737	cytoplasm	inferred from sequence or structural similarity	NM_001242673	GO:0003723	RNA binding	inferred from electronic annotation	NM_006621	HumanCyc	PWY-5041	ENST00000359172	Pfam	IPR000043	Adenosylhomocysteinase	5.19202	6.01403
TC0100009449.hg.1	4.78885	3.70784	2.11552	up	MOV10	Mov10 RISC complex RNA helicase	coding	chr1	+	NM_001130079	112673141	112700746	10	1p13.2	4343	NM_001130079	RefSeq	Homo sapiens Mov10 RISC complex RNA helicase (MOV10), transcript variant 2, mRNA.	chr1	100	100	0	NA	NM_001130079	Q9HCE1	NA	NA	NA	NA	NA	NA	NA	NM_001130079	GO:0000932	cytoplasmic mRNA processing body	inferred from direct assay	NM_001130079	GO:0004386	helicase activity	inferred from electronic annotation	NA	NA	NA	NA	NA	NA	NA	4.78885	3.70784
TC0100009474.hg.1	1.97424	2.63032	-1.5758	down	MAGI3	membrane associated guanylate kinase, WW and PDZ domain containing 3	coding	chr1	+	NM_001142782	113390749	113685923	10	1p13.2	260425	NM_001142782	RefSeq	Homo sapiens membrane associated guanylate kinase, WW and PDZ domain containing 3 (MAGI3), transcript variant 1, mRNA.	chr1	100	100	0	NA	NM_001142782	Q5TCQ9	NM_001142782	Hs.486189	ascites| blood| bone| brain| cervix| ear| embryonic tissue| eye| heart| intestine| kidney| liver| lung| mammary gland| mouth| muscle| pituitary gland| placenta| prostate| stomach| testis| thyroid| uterus| vascular| breast (mammary gland) tumor| cervical tumor| chondrosarcoma| colorectal tumor| gastrointestinal tumor| germ cell tumor| glioma| head and neck tumor| liver tumor| non-neoplasia| normal…	NM_001142782	GO:0006915	apoptotic process	non-traceable author statement	NM_001142782	GO:0005634	nucleus	inferred from electronic annotation	NM_001142782	GO:0004385	guanylate kinase activity	non-traceable author statement	NA	NA	NA	ENST00000307546	Pfam	IPR001202	WW domain	1.97424	2.63032
TC0100009480.hg.1	4.91144	5.59805	-1.6095	down	HIPK1	homeodomain interacting protein kinase 1	coding	chr1	+	NM_152696	113929192	113977869	10	1p13.2	204851	NM_152696	RefSeq	Homo sapiens homeodomain interacting protein kinase 1 (HIPK1), transcript variant 2, mRNA.	chr1	100	100	0	NA	NM_152696	Q86Z02	NM_152696	Hs.532363	adipose tissue| adrenal gland| bladder| blood| bone| bone marrow| brain| cervix| connective tissue| embryonic tissue| esophagus| eye| heart| intestine| kidney| liver| lung| lymph node| mammary gland| mouth| muscle| nerve| ovary| pancreas| parathyroid| pharynx| pituitary gland| placenta| prostate| salivary gland| skin| spleen| stomach| testis| thymus| thyroid| trachea| uterus| vascular| bladder ca…	NA	NA	NA	NA	NM_152696	GO:0005634	nucleus	inferred from direct assay	NM_152696	GO:0004674	protein serine/threonine kinase activity	inferred from electronic annotation	NA	NA	NA	ENST00000340480	Pfam	IPR000719	Protein kinase domain	4.91144	5.59805
TC0100009524.hg.1	3.80488	4.61338	-1.75139	down	VANGL1	VANGL planar cell polarity protein 1	coding	chr1	+	NM_001172411	115641953	115698224	10	1p13.1	81839	NM_001172411	RefSeq	Homo sapiens VANGL planar cell polarity protein 1 (VANGL1), transcript variant 3, mRNA.	chr1	100	100	0	NA	NM_001172411	Q8TAA9	NM_001172411	Hs.515130	adrenal gland| ascites| bladder| blood| bone| bone marrow| brain| cervix| connective tissue| embryonic tissue| esophagus| eye| heart| intestine| kidney| liver| lung| lymph node| mammary gland| mouth| muscle| nerve| ovary| pancreas| pharynx| placenta| prostate| skin| stomach| testis| thymus| uterus| vascular|adrenal tumor| breast (mammary gland) tumor| cervical tumor| chondrosarcoma| colorectal tu…	NM_001172411	GO:0007275	multicellular organismal development	inferred from electronic annotation	NM_001172411	GO:0016021	integral component of membrane	inferred from electronic annotation	NM_001172411	GO:0005515	protein binding	inferred from physical interaction	NA	NA	NA	ENST00000310260	Pfam	IPR009539	Strabismus	3.80488	4.61338
TC0100009561.hg.1	1.46571	2.07644	-1.52703	down	TTF2	transcription termination factor, RNA polymerase II	coding	chr1	+	NM_003594	117060303	117107453	10	1p22	8458	NM_003594	RefSeq	Homo sapiens transcription termination factor, RNA polymerase II (TTF2), mRNA.	chr1	100	100	0	NA	NM_003594	Q9UNY4	NM_003594	Hs.486818	adipose tissue| ascites| blood| bone| brain| cervix| connective tissue| embryonic tissue| esophagus| eye| heart| intestine| kidney| larynx| liver| lymph node| mammary gland| mouth| muscle| ovary| pancreas| placenta| prostate| skin| stomach| testis| thymus| thyroid| trachea| uterus| vascular| breast (mammary gland) tumor| chondrosarcoma| colorectal tumor| esophageal tumor| gastrointestinal tumor| …	NM_003594	GO:0006353	DNA-templated transcription, termination	traceable author statement	NM_003594	GO:0005681	spliceosomal complex	inferred from electronic annotation	NM_003594	GO:0003677	DNA binding	inferred from electronic annotation	NA	NA	NA	ENST00000369466	Pfam	IPR000330	SNF2-related, N-terminal domain	1.46571	2.07644
TC0100009723.hg.1	2.27359	3.33357	-2.0849	down	FAM72D	family with sequence similarity 72, member D	coding	chr1	+	NM_207418	145096000	145112696	10	1q21.1	728833	NM_207418	RefSeq	Homo sapiens family with sequence similarity 72, member D (FAM72D), mRNA.	chr1	100	100	0	NA	NM_207418	Q6L9T8	NM_207418	Hs.535577	bladder| blood| bone| bone marrow| brain| connective tissue| embryonic tissue| eye| intestine| kidney| lung| lymph| lymph node| mammary gland| mouth| muscle| ovary| placenta| skin| stomach| testis| uterus| vascular| bladder carcinoma| breast (mammary gland) tumor| chondrosarcoma| colorectal tumor| gastrointestinal tumor| germ cell tumor| head and neck tumor| kidney tumor| leukemia| lung tumor| ly…	NA	NA	NA	NA	NM_207418	GO:0005737	cytoplasm	inferred from direct assay	NA	NA	NA	NA	NA	NA	NA	ENST00000400889	Pfam	IPR026768	Protein FAM72	2.27359	3.33357
TC0100009899.hg.1	6.18032	5.46091	1.64652	up	C1orf54	chromosome 1 open reading frame 54	coding	chr1	+	NM_001301039	150268200	150280924	10	1q21.2	79630	NM_001301039	RefSeq	Homo sapiens chromosome 1 open reading frame 54 (C1orf54), transcript variant 1, mRNA.	chr1	100	100	0	NA	NM_001301039	Q8WWF1	NM_001301039	Hs.91283	adipose tissue| bone| brain| connective tissue| embryonic tissue| heart| kidney| larynx| liver| lung| mammary gland| muscle| parathyroid| placenta| prostate| skin| testis| uterus| vascular| chondrosarcoma| germ cell tumor| glioma| head and neck tumor| normal| soft tissue/muscle tissue tumor| uterine tumor| blastocyst| fetus| adult	NA	NA	NA	NA	NM_001301039	GO:0005576	extracellular region	inferred from electronic annotation	NA	NA	NA	NA	NA	NA	NA	ENST00000369098	Pfam	IPR027957	Protein of unknown function DUF4634	6.18032	5.46091
TC0100009908.hg.1	1.96307	2.57297	-1.52615	down	ECM1	extracellular matrix protein 1	coding	chr1	+	NM_001202858	150508011	150513789	10	1q21	1893	NM_001202858	RefSeq	Homo sapiens extracellular matrix protein 1 (ECM1), transcript variant 3, mRNA.	chr1	100	100	0	NA	NM_001202858	Q16610	NM_001202858	Hs.81071	adrenal gland| ascites| bladder| blood| bone| brain| cervix| connective tissue| embryonic tissue| esophagus| eye| heart| intestine| kidney| liver| lung| lymph node| mammary gland| mouth| muscle| nerve| ovary| pancreas| pharynx| pituitary gland| placenta| prostate| salivary gland| skin| spleen| stomach| testis| thymus| thyroid| trachea| uterus| vascular| bladder carcinoma| breast (mammary gland) t…	NM_001202858	GO:0001503	ossification	inferred from electronic annotation	NM_001202858	GO:0005578	proteinaceous extracellular matrix	non-traceable author statement	NM_001202858	GO:0002020	protease binding	inferred from physical interaction	NA	NA	NA	ENST00000346569	Pfam	IPR008605	Extracellular matrix 1	1.96307	2.57297
TC0100009929.hg.1	4.11125	4.87726	-1.70056	down	SETDB1	SET domain, bifurcated 1	coding	chr1	+	NM_001145415	150926263	150964744	10	1q21	9869	NM_001145415	RefSeq	Homo sapiens SET domain, bifurcated 1 (SETDB1), transcript variant 1, mRNA.	chr1	100	100	0	NA	NM_001145415	Q15047	NM_001145415	Hs.643565	adipose tissue| ascites| bladder| blood| bone| bone marrow| brain| cervix| connective tissue| ear| embryonic tissue| esophagus| eye| heart| intestine| kidney| liver| lung| lymph| lymph node| mammary gland| mouth| muscle| ovary| pancreas| placenta| prostate| salivary gland| skin| spleen| stomach| testis| thymus| thyroid| tonsil| trachea| uterus| bladder carcinoma| breast (mammary gland) tumor| cer…	NA	NA	NA	NA	NM_001145415	GO:0000790	nuclear chromatin	inferred from electronic annotation	NM_001145415	GO:0003677	DNA binding	inferred from electronic annotation	NA	NA	NA	ENST00000271640	Pfam	IPR001214	SET domain	4.11125	4.87726
TC0100009949.hg.1	7.94531	8.54018	-1.51033	down	PSMD4	proteasome 26S subunit, non-ATPase 4	coding	chr1	+	NM_002810	151254703	151267479	10	1q21.3	5710	NM_002810	RefSeq	Homo sapiens proteasome 26S subunit, non-ATPase 4 (PSMD4), mRNA.	chr1	100	100	0	NA	NM_002810	P55036	NM_002810	Hs.505059	adrenal gland| ascites| bladder| blood| bone| bone marrow| brain| cervix| connective tissue| embryonic tissue| esophagus| eye| heart| intestine| kidney| liver| lung| lymph| lymph node| mammary gland| muscle| ovary| pancreas| parathyroid| placenta| prostate| salivary gland| skin| stomach| testis| thymus| thyroid| tonsil| umbilical cord| uterus| vascular|adrenal tumor| bladder carcinoma| breast (ma…	NA	NA	NA	NA	NM_002810	GO:0000502	proteasome complex	inferred from direct assay	NM_002810	GO:0005515	protein binding	inferred from physical interaction	NM_002810	GenMAPP	Proteasome_Degradation	ENST00000368881	Pfam	IPR003903	Ubiquitin interacting motif	7.94531	8.54018
TC0100009969.hg.1	2.56394	1.91499	1.56802	up	RIIAD1	regulatory subunit of type II PKA R-subunit (RIIa) domain containing 1	coding	chr1	+	NM_001144956	151710433	151729805	10	1q21.3	284485	NM_001144956	RefSeq	Homo sapiens regulatory subunit of type II PKA R-subunit (RIIa) domain containing 1 (RIIAD1), mRNA.	chr1	100	100	0	NA	NM_001144956	A6NNX1	NM_001144956	Hs.297967	eye| pituitary gland| prostate| testis| normal| adult	NA	NA	NA	NA	NA	NA	NA	NA	NM_001144956	GO:0005516	calmodulin binding	not recorded	NA	NA	NA	ENST00000326413	Pfam	IPR003117	cAMP-dependent protein kinase regulatory subunit, dimerization-anchoring domain	2.56394	1.91499
TC0100009994.hg.1	3.21283	2.6157	1.5127	up	CRCT1	cysteine rich C-terminal 1	coding	chr1	+	NM_019060	152514502	152516010	10	1q21	54544	NM_019060	RefSeq	Homo sapiens cysteine-rich C-terminal 1 (CRCT1), mRNA.	chr1	100	100	0	NA	NM_019060	Q9UGL9	NM_019060	Hs.110196	heart| pharynx| skin| head and neck tumor| normal| fetus| adult	NM_019060	GO:0018149	peptide cross-linking	not recorded	NM_019060	GO:0001533	cornified envelope	not recorded	NM_019060	GO:0005198	structural molecule activity	not recorded	NA	NA	NA	NA	NA	NA	NA	3.21283	2.6157
TC0100010044.hg.1	5.30494	5.99793	-1.61663	down	CHTOP	chromatin target of PRMT1	coding	chr1	+	NM_001206612	153633982	153646306	10	1q21.3	26097	NM_001206612	RefSeq	Homo sapiens chromatin target of PRMT1 (CHTOP), transcript variant 2, mRNA.	chr1	100	100	0	NA	NM_001206612	Q9Y3Y2	NM_001206612	Hs.611057	adrenal gland| ascites| blood| bone| bone marrow| brain| cervix| connective tissue| embryonic tissue| esophagus| eye| heart| intestine| kidney| larynx| liver| lung| lymph| lymph node| mammary gland| mouth| muscle| nerve| ovary| pancreas| parathyroid| pharynx| pituitary gland| placenta| prostate| salivary gland| skin| spleen| stomach| testis| thymus| thyroid| tonsil| trachea| uterus| vascular|adre…	NM_001206612	GO:0006351	transcription, DNA-templated	inferred from electronic annotation	NM_001206612	GO:0000346	transcription export complex	inferred from direct assay	NM_001206612	GO:0005515	protein binding	inferred from physical interaction	NA	NA	NA	ENST00000368687	Pfam	IPR025715	Friend of PRMT1 duplication	5.30494	5.99793
TC0100010111.hg.1	5.40441	4.14774	2.38943	up	EFNA1	ephrin-A1	coding	chr1	+	NM_004428	155127460	155134910	10	1q21-q22	1942	NM_004428	RefSeq	Homo sapiens ephrin-A1 (EFNA1), transcript variant 1, mRNA.	chr1	100	100	0	NA	NM_004428	P20827	NM_004428	Hs.516664	ascites| bladder| blood| bone| bone marrow| brain| cervix| connective tissue| embryonic tissue| eye| heart| intestine| kidney| liver| lung| mammary gland| muscle| ovary| pancreas| parathyroid| pharynx| placenta| prostate| salivary gland| skin| spleen| stomach| testis| thymus| thyroid| trachea| umbilical cord| uterus| vascular| bladder carcinoma| breast (mammary gland) tumor| cervical tumor| chond…	NA	NA	NA	NA	NM_004428	GO:0005576	extracellular region	traceable author statement	NM_004428	GO:0005102	receptor binding	traceable author statement	NA	NA	NA	ENST00000368406	Pfam	IPR001799	Ephrin receptor-binding domain	5.40441	4.14774
TC0100010134.hg.1	5.9174	6.54821	-1.54843	down	DAP3	death associated protein 3	coding	chr1	+	NM_001199849	155687960	155739010	10	1q22	7818	NM_001199849	RefSeq	Homo sapiens death associated protein 3 (DAP3), transcript variant 3, mRNA.	chr1	100	100	0	NA	NM_001199849	P51398	NA	NA	NA	NA	NA	NA	NA	NA	NA	NA	NA	NM_001199849	GO:0003735	structural constituent of ribosome	not recorded	NA	NA	NA	ENST00000343043	Pfam	IPR019368	Ribosomal protein S23/S29, mitochondrial	5.9174	6.54821
TC0100010140.hg.1	5.30946	6.27105	-1.94746	down	SYT11	synaptotagmin XI	coding	chr1	+	NM_152280	155859469	155885199	10	1q21.2	23208	NM_152280	RefSeq	Homo sapiens synaptotagmin XI (SYT11), mRNA.	chr1	100	100	0	NA	NM_152280	Q9BT88	NM_152280	Hs.32984	adrenal gland| blood| bone| brain| cervix| connective tissue| embryonic tissue| esophagus| eye| heart| intestine| kidney| liver| lung| lymph| lymph node| mammary gland| mouth| muscle| nerve| pancreas| pharynx| pituitary gland| placenta| prostate| skin| stomach| testis| thymus| trachea| uterus| vascular|adrenal tumor| cervical tumor| chondrosarcoma| colorectal tumor| gastrointestinal tumor| germ c…	NM_152280	GO:0006906	vesicle fusion	not recorded	NM_152280	GO:0005886	plasma membrane	not recorded	NM_152280	GO:0005509	calcium ion binding	not recorded	NA	NA	NA	ENST00000368324	Pfam	IPR000008	C2 domain	5.30946	6.27105
TC0100010149.hg.1	1.95785	2.57593	-1.53483	down	RAB25	RAB25, member RAS oncogene family	coding	chr1	+	NM_020387	156061160	156070514	10	1q22	57111	NM_020387	RefSeq	Homo sapiens RAB25, member RAS oncogene family (RAB25), mRNA.	chr1	100	100	0	NA	NM_020387	P57735	NM_020387	Hs.632469	adrenal gland| ascites| bladder| brain| cervix| connective tissue| embryonic tissue| esophagus| eye| heart| intestine| kidney| liver| lung| lymph node| mammary gland| mouth| nerve| ovary| pancreas| parathyroid| pharynx| placenta| prostate| skin| stomach| testis| thyroid| trachea| uterus| bladder carcinoma| breast (mammary gland) tumor| chondrosarcoma| colorectal tumor| esophageal tumor| gastroint…	NM_020387	GO:0003382	epithelial cell morphogenesis	inferred from sequence or structural similarity	NM_020387	GO:0016023	cytoplasmic membrane-bounded vesicle	inferred from electronic annotation	NM_020387	GO:0003924	GTPase activity	not recorded	NA	NA	NA	ENST00000361084	Pfam	IPR001806	Small GTPase superfamily	1.95785	2.57593
TC0100010244.hg.1	9.12763	8.35062	1.71359	up	IFI16	interferon, gamma-inducible protein 16	coding	chr1	+	NM_001206567	158999968	159055155	10	1q22	3428	NM_001206567	RefSeq	Homo sapiens interferon, gamma-inducible protein 16 (IFI16), transcript variant 1, mRNA.	chr1	100	100	0	NA	NM_001206567	Q16666	NM_001206567	Hs.380250	adipose tissue| adrenal gland| ascites| bladder| blood| bone| bone marrow| brain| cervix| connective tissue| ear| embryonic tissue| esophagus| eye| heart| intestine| kidney| larynx| liver| lung| lymph| lymph node| mammary gland| mouth| muscle| ovary| pancreas| pharynx| placenta| prostate| salivary gland| skin| spleen| stomach| testis| thymus| thyroid| trachea| uterus| vascular|adrenal tumor| blad…	NA	NA	NA	NA	NM_001206567	GO:0005634	nucleus	inferred from direct assay	NM_001206567	GO:0000978	RNA polymerase II core promoter proximal region sequence-specific DNA binding	inferred from direct assay	NA	NA	NA	ENST00000295809	Pfam	IPR004020	DAPIN domain	9.12763	8.35062
TC0100010283.hg.1	1.47047	2.28144	-1.7544	down	CASQ1	calsequestrin 1 (fast-twitch, skeletal muscle)	coding	chr1	+	NM_001231	160190495	160201886	10	1q21	844	NM_001231	RefSeq	Homo sapiens calsequestrin 1 (fast-twitch, skeletal muscle) (CASQ1), mRNA.	chr1	100	100	0	NA	NM_001231	P31415	NM_001231	Hs.632476	bladder| brain| eye| heart| intestine| larynx| liver| mouth| muscle| pharynx| placenta| prostate| colorectal tumor| head and neck tumor| normal| soft tissue/muscle tissue tumor| fetus| adult	NM_001231	GO:0007029	endoplasmic reticulum organization	inferred from electronic annotation	NM_001231	GO:0005739	mitochondrion	inferred from direct assay	NM_001231	GO:0005509	calcium ion binding	inferred from direct assay	NM_001231	GenMAPP	Calcium_regulation_in_cardiac_cells	ENST00000368078	Pfam	IPR001393	Calsequestrin	1.47047	2.28144
TC0100010340.hg.1	6.46208	7.18248	-1.64764	down	NDUFS2	NADH dehydrogenase (ubiquinone) Fe-S protein 2, 49kDa (NADH-coenzyme Q reductase)	coding	chr1	+	NM_001166159	161197104	161214395	10	1q23	4720	NM_001166159	RefSeq	Homo sapiens NADH dehydrogenase (ubiquinone) Fe-S protein 2, 49kDa (NADH-coenzyme Q reductase) (NDUFS2), transcript variant 2, mRNA.	chr1	100	100	0	NA	NM_001166159	O75306	NA	NA	NA	NM_001166159	GO:0006120	mitochondrial electron transport, NADH to ubiquinone	non-traceable author statement	NA	NA	NA	NA	NA	NA	NA	NA	NM_001166159	GenMAPP	Electron_Transport_Chain	ENST00000367993	Pfam	IPR001135	NADH-quinone oxidoreductase, subunit D	6.46208	7.18248
TC0100010387.hg.1	4.02656	5.3396	-2.48465	down	DDR2	discoidin domain receptor tyrosine kinase 2	coding	chr1	+	NM_001014796	162631373	162787400	10	1q23.3	4921	NM_001014796	RefSeq	Homo sapiens discoidin domain receptor tyrosine kinase 2 (DDR2), transcript variant 1, mRNA.	chr1	100	100	0	NA	NM_001014796	Q16832	NM_001014796	Hs.275757	adipose tissue| adrenal gland| bone| bone marrow| brain| connective tissue| ear| embryonic tissue| eye| heart| intestine| kidney| larynx| liver| lung| lymph node| mammary gland| muscle| nerve| ovary| pancreas| parathyroid| pituitary gland| placenta| prostate| skin| stomach| testis| thyroid| trachea| umbilical cord| uterus| vascular|adrenal tumor| breast (mammary gland) tumor| chondrosarcoma| gast…	NA	NA	NA	NA	NM_001014796	GO:0005886	plasma membrane	traceable author statement	NM_001014796	GO:0004714	transmembrane receptor protein tyrosine kinase activity	inferred from direct assay	NA	NA	NA	ENST00000367921	Pfam	IPR000421	Coagulation factor 5/8 C-terminal domain	4.02656	5.3396
TC0100010393.hg.1	6.62772	7.24998	-1.53928	down	RGS4	regulator of G-protein signaling 4	coding	chr1	+	NM_001102445	163068606	163076802	10	1q23.3	5999	NM_001102445	RefSeq	Homo sapiens regulator of G-protein signaling 4 (RGS4), transcript variant 1, mRNA.	chr1	100	100	0	NA	NM_001102445	P49798	NM_001102445	Hs.386726	adrenal gland| bladder| bone| bone marrow| brain| connective tissue| embryonic tissue| eye| intestine| kidney| liver| lung| mammary gland| mouth| nerve| ovary| pancreas| prostate| skin| spleen| stomach| testis| thymus| thyroid| trachea| umbilical cord| uterus| vascular|adrenal tumor| breast (mammary gland) tumor| chondrosarcoma| germ cell tumor| glioma| head and neck tumor| kidney tumor| leukemia…	NM_001102445	GO:0000188	inactivation of MAPK activity	traceable author statement	NM_001102445	GO:0005634	nucleus	inferred from direct assay	NM_001102445	GO:0001965	G-protein alpha-subunit binding	inferred from electronic annotation	NM_001102445	GenMAPP	Calcium_regulation_in_cardiac_cells	ENST00000367906	Pfam	IPR016137	RGS domain	6.62772	7.24998
TC0100010397.hg.1	2.64666	3.80898	-2.23818	down	NUF2	NUF2, NDC80 kinetochore complex component	coding	chr1	+	NM_031423	163266576	163355764	10	1q23.3	83540	NM_031423	RefSeq	Homo sapiens NUF2, NDC80 kinetochore complex component (NUF2), transcript variant 2, mRNA.	chr1	100	100	0	NA	NM_031423	Q9BZD4	NM_031423	Hs.651950	blood| bone| bone marrow| brain| connective tissue| ear| embryonic tissue| eye| intestine| kidney| liver| lung| lymph| lymph node| mammary gland| muscle| ovary| pancreas| placenta| prostate| salivary gland| skin| stomach| testis| thymus| uterus| vascular| bladder carcinoma| breast (mammary gland) tumor| chondrosarcoma| colorectal tumor| gastrointestinal tumor| germ cell tumor| kidney tumor| leuke…	NM_031423	GO:0000278	mitotic cell cycle	traceable author statement	NM_031423	GO:0000775	chromosome, centromeric region	non-traceable author statement	NM_031423	GO:0005515	protein binding	inferred from physical interaction	NA	NA	NA	ENST00000271452	Pfam	IPR005549	Kinetochore protein Nuf2	2.64666	3.80898
TC0100010514.hg.1	5.31991	5.90628	-1.50146	down	MPZL1	myelin protein zero-like 1	coding	chr1	+	NM_001146191	167721192	167791919	10	1q24.2	9019	NM_001146191	RefSeq	Homo sapiens myelin protein zero-like 1 (MPZL1), transcript variant 3, mRNA.	chr1	100	100	0	NA	NM_001146191	O95297	NM_001146191	Hs.493919	adipose tissue| adrenal gland| ascites| bladder| blood| bone| bone marrow| brain| cervix| connective tissue| ear| embryonic tissue| esophagus| eye| heart| intestine| kidney| liver| lung| lymph node| mammary gland| mouth| muscle| nerve| ovary| pancreas| parathyroid| pharynx| pituitary gland| placenta| prostate| skin| spleen| stomach| testis| thymus| trachea| uterus| vascular|adrenal tumor| breast …	NM_001146191	GO:0007169	transmembrane receptor protein tyrosine kinase signaling pathway	traceable author statement	NM_001146191	GO:0005887	integral component of plasma membrane	inferred from electronic annotation	NM_001146191	GO:0005198	structural molecule activity	traceable author statement	NA	NA	NA	ENST00000359523	Pfam	IPR013106	Immunoglobulin V-set domain	5.31991	5.90628
TC0100010518.hg.1	4.79508	5.56334	-1.70322	down	DCAF6	DDB1 and CUL4 associated factor 6	coding	chr1	+	NM_001017977	167935783	168075845	10	1q24.2	55827	NM_001017977	RefSeq	Homo sapiens DDB1 and CUL4 associated factor 6 (DCAF6), transcript variant 2, mRNA.	chr1	100	100	0	NA	NM_001017977	Q58WW2	NM_001017977	Hs.435741	adipose tissue| adrenal gland| ascites| bladder| blood| bone| bone marrow| brain| cervix| connective tissue| embryonic tissue| esophagus| eye| heart| intestine| kidney| larynx| liver| lung| lymph| lymph node| mammary gland| mouth| muscle| nerve| ovary| pancreas| parathyroid| pharynx| pituitary gland| placenta| prostate| skin| spleen| stomach| testis| thymus| thyroid| tonsil| trachea| uterus| vasc…	NM_001017977	GO:0016567	protein ubiquitination	inferred by curator	NM_001017977	GO:0005634	nucleus	inferred from direct assay	NM_001017977	GO:0030374	ligand-dependent nuclear receptor transcription coactivator activity	inferred from direct assay	NA	NA	NA	ENST00000312263	Pfam	IPR001680	WD40 repeat	4.79508	5.56334
TC0100010543.hg.1	4.29034	5.80605	-2.85939	down	ATP1B1	ATPase, Na+/K+ transporting, beta 1 polypeptide	coding	chr1	+	NM_001677	169105697	169132722	10	1q24	481	NM_001677	RefSeq	Homo sapiens ATPase, Na+/K+ transporting, beta 1 polypeptide (ATP1B1), mRNA.	chr1	100	100	0	NA	NM_001677	P05026	NM_001677	Hs.291196	adipose tissue| adrenal gland| ascites| bladder| blood| bone marrow| brain| cervix| connective tissue| ear| embryonic tissue| esophagus| eye| heart| intestine| kidney| liver| lung| lymph node| mammary gland| mouth| muscle| nerve| ovary| pancreas| parathyroid| pharynx| pituitary gland| placenta| prostate| salivary gland| skin| spleen| stomach| testis| thyroid| tonsil| trachea| uterus|adrenal tumor…	NA	NA	NA	NA	NM_001677	GO:0005622	intracellular	inferred from electronic annotation	NM_001677	GO:0001671	ATPase activator activity	inferred from direct assay	NM_001677	GenMAPP	Calcium_regulation_in_cardiac_cells	ENST00000367815	Pfam	IPR000402	Sodium/potassium-transporting ATPase subunit beta	4.29034	5.80605
TC0100010553.hg.1	2.01568	2.82528	-1.75272	down	C1orf112	chromosome 1 open reading frame 112	coding	chr1	+	NM_018186	169662007	169854080	10	1q24.2	55732	NM_018186	RefSeq	Homo sapiens chromosome 1 open reading frame 112 (C1orf112), mRNA.	chr1	100	100	0	NA	NM_018186	Q9NSG2	NM_018186	Hs.443551	blood| bone marrow| brain| cervix| connective tissue| embryonic tissue| eye| heart| intestine| kidney| liver| lung| lymph node| mammary gland| mouth| muscle| ovary| pancreas| parathyroid| placenta| prostate| testis| thymus| trachea| umbilical cord| uterus| vascular| breast (mammary gland) tumor| cervical tumor| colorectal tumor| gastrointestinal tumor| germ cell tumor| glioma| head and neck tumor…	NA	NA	NA	NA	NA	NA	NA	NA	NA	NA	NA	NA	NA	NA	NA	ENST00000286031	Pfam	IPR027902	Protein of unknown function DUF4487	2.01568	2.82528
TC0100010654.hg.1	4.64408	5.4016	-1.69058	down	KLHL20	kelch-like family member 20	coding	chr1	+	NM_014458	173714941	173786703	10	1q25.1	27252	NM_014458	RefSeq	Homo sapiens kelch-like family member 20 (KLHL20), mRNA.	chr1	100	100	0	NA	NM_014458	Q9Y2M5	NM_014458	Hs.495035	adipose tissue| ascites| bladder| blood| bone marrow| brain| connective tissue| ear| embryonic tissue| esophagus| eye| heart| intestine| kidney| liver| lung| lymph node| mammary gland| mouth| muscle| nerve| ovary| pancreas| parathyroid| placenta| prostate| skin| spleen| testis| thymus| trachea| uterus| vascular| breast (mammary gland) tumor| chondrosarcoma| colorectal tumor| esophageal tumor| gas…	NM_014458	GO:0006895	Golgi to endosome transport	inferred from mutant phenotype	NM_014458	GO:0005737	cytoplasm	inferred from direct assay	NM_014458	GO:0003779	actin binding	inferred from electronic annotation	NA	NA	NA	ENST00000209884	Pfam	IPR000210	BTB/POZ domain	4.64408	5.4016
TC0100010661.hg.1	3.70975	4.46581	-1.68887	down	DARS2	aspartyl-tRNA synthetase 2, mitochondrial	coding	chr1	+	NM_018122	173824503	173858546	10	1q25.1	55157	NM_018122	RefSeq	Homo sapiens aspartyl-tRNA synthetase 2, mitochondrial (DARS2), mRNA.	chr1	100	100	0	NA	NM_018122	Q6PI48	NM_018122	Hs.647707	adipose tissue| ascites| bladder| bone| bone marrow| brain| connective tissue| embryonic tissue| eye| heart| intestine| kidney| liver| lung| lymph| lymph node| mammary gland| mouth| muscle| nerve| ovary| pancreas| pharynx| pituitary gland| placenta| prostate| salivary gland| skin| spleen| stomach| testis| thymus| trachea| uterus| vascular| bladder carcinoma| breast (mammary gland) tumor| chondros…	NM_018122	GO:0006418	tRNA aminoacylation for protein translation	traceable author statement	NM_018122	GO:0005634	nucleus	inferred from direct assay	NM_018122	GO:0000049	tRNA binding	traceable author statement	NA	NA	NA	ENST00000361951	Pfam	IPR004364	Aminoacyl-tRNA synthetase, class II (D/K/N)	3.70975	4.46581
TC0100010755.hg.1	1.71352	2.39367	-1.60231	down	RALGPS2	Ral GEF with PH domain and SH3 binding motif 2	coding	chr1	+	NM_001286247	178725147	178921842	10	1q25.2	55103	NM_001286247	RefSeq	Homo sapiens Ral GEF with PH domain and SH3 binding motif 2 (RALGPS2), transcript variant 2, mRNA.	chr1	100	100	0	NA	NM_001286247	Q86X27	NM_001286247	Hs.632485	bladder| brain| connective tissue| embryonic tissue| eye| heart| intestine| kidney| liver| lung| lymph node| mammary gland| mouth| muscle| ovary| pancreas| pharynx| placenta| prostate| skin| spleen| stomach| testis| thymus| thyroid| uterus| vascular| bladder carcinoma| breast (mammary gland) tumor| chondrosarcoma| gastrointestinal tumor| germ cell tumor| head and neck tumor| kidney tumor| leukemi…	NM_001286247	GO:0007264	small GTPase mediated signal transduction	inferred from electronic annotation	NM_001286247	GO:0005737	cytoplasm	inferred from electronic annotation	NM_001286247	GO:0005085	guanyl-nucleotide exchange factor activity	inferred from electronic annotation	NA	NA	NA	ENST00000324778	Pfam	IPR001895	Ras guanine-nucleotide exchange factors catalytic domain	1.71352	2.39367
TC0100010786.hg.1	2.79719	3.52503	-1.65616	down	FAM163A	family with sequence similarity 163, member A	coding	chr1	+	NM_173509	179743163	179816198	10	1q25.2	148753	NM_173509	RefSeq	Homo sapiens family with sequence similarity 163, member A (FAM163A), mRNA.	chr1	100	100	0	NA	NM_173509	Q96GL9	NM_173509	Hs.729631	brain| eye| liver| nerve| ovary| pituitary gland| testis| thymus| germ cell tumor| liver tumor| normal| ovarian tumor| primitive neuroectodermal tumor of the CNS| fetus| juvenile| adult	NA	NA	NA	NA	NM_173509	GO:0016021	integral component of membrane	inferred from electronic annotation	NA	NA	NA	NA	NA	NA	NA	ENST00000341785	Pfam	IPR029379	FAM163	2.79719	3.52503
TC0100010858.hg.1	4.21545	5.04458	-1.77661	down	DHX9	DEAH (Asp-Glu-Ala-His) box helicase 9	coding	chr1	+	NM_001357	182839304	182887982	10	1q25	1660	NM_001357	RefSeq	Homo sapiens DEAH (Asp-Glu-Ala-His) box helicase 9 (DHX9), transcript variant 1, mRNA.	chr1	100	100	0	NA	NM_001357	Q08211	NM_001357	Hs.191518	adipose tissue| adrenal gland| ascites| bladder| blood| bone| bone marrow| brain| cervix| connective tissue| ear| embryonic tissue| esophagus| eye| heart| intestine| kidney| larynx| liver| lung| lymph| lymph node| mammary gland| mouth| muscle| nerve| ovary| pancreas| parathyroid| pharynx| pituitary gland| placenta| prostate| skin| spleen| stomach| testis| thymus| thyroid| tonsil| trachea| umbilic…	NM_001357	GO:0000398	mRNA splicing, via spliceosome	traceable author statement	NM_001357	GO:0005634	nucleus	inferred from direct assay	NM_001357	GO:0001085	RNA polymerase II transcription factor binding	inferred from physical interaction	NM_001357	GenMAPP	mRNA_processing_Reactome	ENST00000367549	Pfam	IPR001650	Helicase, C-terminal	4.21545	5.04458
TC0100010887.hg.1	2.64836	3.28361	-1.55321	down	C1orf21	chromosome 1 open reading frame 21	coding	chr1	+	NM_030806	184387016	184629021	10	1q25	81563	NM_030806	RefSeq	Homo sapiens chromosome 1 open reading frame 21 (C1orf21), mRNA.	chr1	100	100	0	NA	NM_030806	Q9H246	NM_030806	Hs.497159	adrenal gland| brain| connective tissue| eye| heart| intestine| kidney| liver| mouth| muscle| testis| colorectal tumor| germ cell tumor| glioma| head and neck tumor| kidney tumor| liver tumor| lymphoma| non-neoplasia| normal| fetus| adult	NA	NA	NA	NA	NA	NA	NA	NA	NM_030806	GO:0005515	protein binding	inferred from physical interaction	NA	NA	NA	ENST00000235307	Pfam	IPR027967	Protein of unknown function DUF4612	2.64836	3.28361
TC0100010939.hg.1	2.5716	3.19928	-1.54508	down	PLA2G4A	phospholipase A2, group IVA (cytosolic, calcium-dependent)	coding	chr1	+	NM_001311193	186828900	186988981	10	1q25	5321	NM_001311193	RefSeq	Homo sapiens phospholipase A2, group IVA (cytosolic, calcium-dependent) (PLA2G4A), transcript variant 2, mRNA.	chr1	100	100	0	NA	NM_001311193	P47712	NM_001311193	Hs.497200	brain| connective tissue| embryonic tissue| eye| intestine| kidney| lung| mouth| ovary| pharynx| placenta| prostate| skin| stomach| testis| uterus| vascular| colorectal tumor| gastrointestinal tumor| glioma| head and neck tumor| lung tumor| normal| ovarian tumor| soft tissue/muscle tissue tumor| uterine tumor| fetus| adult	NM_001311193	GO:0006644	phospholipid metabolic process	traceable author statement	NM_001311193	GO:0005737	cytoplasm	inferred from direct assay	NM_001311193	GO:0004622	lysophospholipase activity	inferred from electronic annotation	NM_001311193	GenMAPP	Prostaglandin_synthesis_regulation	ENST00000367466	Pfam	IPR000008	C2 domain	2.5716	3.19928
TC0100011026.hg.1	3.37408	4.21684	-1.79348	down	TROVE2	TROVE domain family, member 2	coding	chr1	+	NM_001042369	193059422	193091777	10	1q31	6738	NM_001042369	RefSeq	Homo sapiens TROVE domain family, member 2 (TROVE2), transcript variant 1, mRNA.	chr1	100	100	0	NA	NM_001042369	P10155	NM_001042369	Hs.288178	adipose tissue| ascites| blood| bone| bone marrow| brain| cervix| connective tissue| ear| embryonic tissue| esophagus| eye| heart| intestine| kidney| liver| lung| lymph node| mammary gland| mouth| muscle| nerve| ovary| pancreas| parathyroid| pharynx| placenta| prostate| salivary gland| skin| spleen| stomach| testis| thymus| thyroid| trachea| umbilical cord| uterus| vascular| breast (mammary gland…	NM_001042369	GO:0002520	immune system development	inferred from electronic annotation	NM_001042369	GO:0005634	nucleus	inferred from electronic annotation	NM_001042369	GO:0003723	RNA binding	traceable author statement	NA	NA	NA	ENST00000367441	Pfam	IPR008858	TROVE domain	3.37408	4.21684
TC0100011027.hg.1	4.39311	5.2059	-1.7566	down	CDC73	cell division cycle 73	coding	chr1	+	NM_024529	193121958	193254812	10	1q25	79577	NM_024529	RefSeq	Homo sapiens cell division cycle 73 (CDC73), mRNA.	chr1	100	100	0	NA	NM_024529	Q6P1J9	NM_024529	Hs.378996	adrenal gland| ascites| bladder| blood| bone| bone marrow| brain| connective tissue| ear| embryonic tissue| esophagus| eye| heart| intestine| kidney| liver| lung| lymph| lymph node| mammary gland| mouth| muscle| nerve| pancreas| parathyroid| pharynx| placenta| prostate| skin| spleen| stomach| testis| thymus| thyroid| trachea| uterus| vascular|adrenal tumor| bladder carcinoma| breast (mammary glan…	NM_024529	GO:0000122	negative regulation of transcription from RNA polymerase II promoter	inferred from mutant phenotype	NM_024529	GO:0000784	nuclear chromosome, telomeric region	inferred from direct assay	NM_024529	GO:0000993	RNA polymerase II core binding	inferred from direct assay	NA	NA	NA	ENST00000367435	Pfam	IPR031336	Cell division control protein 73, C-terminal	4.39311	5.2059
TC0100011066.hg.1	1.38829	2.28146	-1.85725	down	CFHR3	complement factor H-related 3	coding	chr1	+	NM_001166624	196774795	196795406	10	1q32	10878	NM_001166624	RefSeq	Homo sapiens complement factor H-related 3 (CFHR3), transcript variant 2, mRNA.	chr1	100	100	0	NA	NM_001166624	Q02985	NM_001166624	Hs.709217	connective tissue| larynx| liver| lung| muscle| testis| uterus| germ cell tumor| head and neck tumor| liver tumor| normal| soft tissue/muscle tissue tumor| uterine tumor| fetus| adult	NA	NA	NA	NA	NM_001166624	GO:0005615	extracellular space	traceable author statement	NA	NA	NA	NA	NA	NA	NA	ENST00000367425	Pfam	IPR000436	Sushi/SCR/CCP domain	1.38829	2.28146
TC0100011384.hg.1	5.8283	6.51088	-1.60501	down	MAPKAPK2	mitogen-activated protein kinase-activated protein kinase 2	coding	chr1	+	NM_004759	206684944	206734285	10	1q32	9261	NM_004759	RefSeq	Homo sapiens mitogen-activated protein kinase-activated protein kinase 2 (MAPKAPK2), transcript variant 1, mRNA.	chr1	100	100	0	NA	NM_004759	P49137	NM_004759	Hs.643566	adipose tissue| adrenal gland| ascites| bladder| blood| bone| bone marrow| brain| cervix| connective tissue| ear| embryonic tissue| esophagus| eye| heart| intestine| kidney| larynx| liver| lung| lymph| lymph node| mammary gland| mouth| muscle| ovary| pancreas| pharynx| pituitary gland| placenta| prostate| salivary gland| skin| spleen| stomach| testis| thyroid| tonsil| umbilical cord| uterus| brea…	NA	NA	NA	NA	NM_004759	GO:0005634	nucleus	inferred from direct assay	NM_004759	GO:0004672	protein kinase activity	traceable author statement	NA	NA	NA	ENST00000294981	Pfam	IPR000719	Protein kinase domain	5.8283	6.51088
TC0100011520.hg.1	4.90458	3.66283	2.36485	up	PPP2R5A	protein phosphatase 2, regulatory subunit B, alpha	coding	chr1	+	NM_001199756	212285537	212361863	10	1q32.2-q32.3	5525	NM_001199756	RefSeq	Homo sapiens protein phosphatase 2, regulatory subunit B, alpha (PPP2R5A), transcript variant 2, mRNA.	chr1	100	100	0	NA	NM_001199756	Q15172	NM_001199756	Hs.744012	adipose tissue| adrenal gland| ascites| bladder| blood| bone| bone marrow| brain| cervix| connective tissue| embryonic tissue| eye| heart| intestine| kidney| larynx| liver| lung| lymph node| mammary gland| mouth| muscle| nerve| ovary| pancreas| placenta| prostate| salivary gland| skin| spleen| stomach| testis| thymus| thyroid| trachea| uterus| vascular| bladder carcinoma| breast (mammary gland) t…	NM_001199756	GO:0007165	signal transduction	inferred from electronic annotation	NM_001199756	GO:0000159	protein phosphatase type 2A complex	inferred from direct assay	NM_001199756	GO:0005515	protein binding	inferred from physical interaction	NM_001199756	GenMAPP	Glycogen_Metabolism	ENST00000261461	Pfam	IPR002554	Protein phosphatase 2A, regulatory B subunit, B56	4.90458	3.66283
TC0100011554.hg.1	2.74176	3.41607	-1.59584	down	RPS6KC1	ribosomal protein S6 kinase, 52kDa, polypeptide 1	coding	chr1	+	NM_001136138	213051233	213274773	10	1q41	26750	NM_001136138	RefSeq	Homo sapiens ribosomal protein S6 kinase, 52kDa, polypeptide 1 (RPS6KC1), transcript variant 2, mRNA.	chr1	100	100	0	NA	NM_001136138	Q96S38	NM_001136138	Hs.591416	adrenal gland| bladder| blood| bone| brain| cervix| connective tissue| embryonic tissue| esophagus| eye| heart| intestine| kidney| liver| lung| lymph node| mammary gland| mouth| muscle| nerve| pancreas| parathyroid| placenta| prostate| skin| stomach| testis| thyroid| trachea| uterus| vascular| breast (mammary gland) tumor| cervical tumor| chondrosarcoma| esophageal tumor| gastrointestinal tumor| …	NM_001136138	GO:0006468	protein phosphorylation	inferred from electronic annotation	NM_001136138	GO:0005737	cytoplasm	inferred from direct assay	NM_001136138	GO:0004674	protein serine/threonine kinase activity	inferred from electronic annotation	NA	NA	NA	ENST00000366959	Pfam	IPR000719	Protein kinase domain	2.74176	3.41607
TC0100011581.hg.1	2.52279	3.19047	-1.58852	down	CENPF	centromere protein F	coding	chr1	+	NM_016343	214603189	214664588	10	1q41	1063	NM_016343	RefSeq	Homo sapiens centromere protein F, 350/400kDa (CENPF), mRNA.	chr1	100	100	0	NA	NM_016343	P49454	NM_016343	Hs.497741	adrenal gland| ascites| bladder| blood| bone| bone marrow| brain| connective tissue| embryonic tissue| esophagus| eye| heart| intestine| kidney| liver| lung| lymph node| mammary gland| muscle| ovary| pancreas| placenta| prostate| salivary gland| skin| spleen| stomach| testis| thymus| uterus|adrenal tumor| bladder carcinoma| breast (mammary gland) tumor| chondrosarcoma| colorectal tumor| esophagea…	NA	NA	NA	NA	NM_016343	GO:0000775	chromosome, centromeric region	inferred from direct assay	NM_016343	GO:0003682	chromatin binding	non-traceable author statement	NA	NA	NA	ENST00000366955	Pfam	IPR018302	Kinetochore protein Cenp-F/LEK1, Rb protein-binding domain	2.52279	3.19047
TC0100011648.hg.1	4.26028	5.77664	-2.86068	down	IARS2	isoleucyl-tRNA synthetase 2, mitochondrial	coding	chr1	+	NM_018060	220094102	220148041	10	1q41	55699	NM_018060	RefSeq	Homo sapiens isoleucyl-tRNA synthetase 2, mitochondrial (IARS2), mRNA.	chr1	100	100	0	NA	NM_018060	Q9NSE4	NM_018060	Hs.262823	adipose tissue| adrenal gland| ascites| bladder| blood| bone| bone marrow| brain| cervix| connective tissue| embryonic tissue| eye| heart| intestine| kidney| larynx| liver| lung| lymph node| mammary gland| mouth| muscle| ovary| parathyroid| pharynx| pituitary gland| placenta| prostate| salivary gland| skin| spleen| stomach| testis| thyroid| trachea| uterus| vascular| breast (mammary gland) tumor|…	NM_018060	GO:0006418	tRNA aminoacylation for protein translation	traceable author statement	NM_018060	GO:0005737	cytoplasm	inferred from direct assay	NM_018060	GO:0002161	aminoacyl-tRNA editing activity	inferred from electronic annotation	NM_018060	HumanCyc	TRNA-CHARGING-PWY	ENST00000366922	Pfam	IPR002300	Aminoacyl-tRNA synthetase, class Ia	4.26028	5.77664
TC0100011736.hg.1	5.66429	6.42584	-1.69531	down	DEGS1	delta(4)-desaturase, sphingolipid 1	coding	chr1	+	NM_003676	224175756	224193441	10	1q42.11	8560	NM_003676	RefSeq	Homo sapiens delta(4)-desaturase, sphingolipid 1 (DEGS1), mRNA.	chr1	100	100	0	NA	NM_003676	O15121	NM_003676	Hs.299878	adipose tissue| adrenal gland| bladder| blood| bone| bone marrow| brain| cervix| connective tissue| embryonic tissue| esophagus| eye| heart| intestine| kidney| liver| lung| lymph| lymph node| mammary gland| mouth| muscle| nerve| ovary| pancreas| pharynx| pituitary gland| placenta| prostate| skin| stomach| testis| thyroid| umbilical cord| uterus| vascular|adrenal tumor| breast (mammary gland) tumo…	NM_003676	GO:0006636	unsaturated fatty acid biosynthetic process	traceable author statement	NM_003676	GO:0005739	mitochondrion	inferred from electronic annotation	NM_003676	GO:0009055	electron carrier activity	traceable author statement	NA	NA	NA	ENST00000323699	Pfam	IPR005804	Fatty acid desaturase domain	5.66429	6.42584
TC0100011758.hg.1	1.86409	2.69568	-1.77964	down	T031612	Transcript identified by MiTranscriptome	coding	chr1	+	T031612	225404011	225417648	6	NA	NA	T031612	miTranscriptome	Transcript identified by MiTranscriptome	chr1	100	100	0	NA	NA	NA	NA	NA	NA	NA	NA	NA	NA	NA	NA	NA	NA	NA	NA	NA	NA	NA	NA	NA	NA	NA	NA	NA	1.86409	2.69568
TC0100012222.hg.1	6.2183	6.84413	-1.5431	down	DESI2	desumoylating isopeptidase 2	coding	chr1	+	NM_001297746	244652935	244709034	10	1q44	51029	NM_001297746	RefSeq	Homo sapiens desumoylating isopeptidase 2 (DESI2), transcript variant 2, mRNA.	chr1	100	100	0	NA	NM_001297746	Q9BSY9	NM_001297746	Hs.498317	adrenal gland| ascites| bladder| blood| bone| brain| cervix| connective tissue| embryonic tissue| esophagus| eye| heart| intestine| kidney| larynx| liver| lung| lymph| lymph node| mammary gland| muscle| nerve| ovary| pancreas| parathyroid| placenta| prostate| salivary gland| skin| stomach| testis| thymus| uterus| vascular|adrenal tumor| bladder carcinoma| breast (mammary gland) tumor| chondrosarc…	NM_001297746	GO:0006508	proteolysis	inferred from electronic annotation	NM_001297746	GO:0005737	cytoplasm	inferred from electronic annotation	NM_001297746	GO:0008233	peptidase activity	inferred from electronic annotation	NA	NA	NA	ENST00000263831	Pfam	IPR008580	PPPDE putative peptidase domain	6.2183	6.84413
TC0100012452.hg.1	4.18858	4.9426	-1.6865	down	TNFRSF18	tumor necrosis factor receptor superfamily, member 18	coding	chr1	-	NM_004195	1203508	1206709	10	1p36.3	8784	NM_004195	RefSeq	Homo sapiens tumor necrosis factor receptor superfamily, member 18 (TNFRSF18), transcript variant 1, mRNA.	chr1	100	100	0	NA	NM_004195	Q9Y5U5	NM_004195	Hs.212680	blood| brain| esophagus| intestine| kidney| lung| lymph node| ovary| stomach| trachea| esophageal tumor| gastrointestinal tumor| kidney tumor| leukemia| lymphoma| normal| ovarian tumor| fetus| adult	NM_004195	GO:0002687	positive regulation of leukocyte migration	inferred from mutant phenotype	NM_004195	GO:0005576	extracellular region	inferred from electronic annotation	NM_004195	GO:0005031	tumor necrosis factor-activated receptor activity	traceable author statement	NA	NA	NA	NA	NA	NA	NA	4.18858	4.9426
TC0100012593.hg.1	2.86203	2.08963	1.7081	up	WRAP73	WD repeat containing, antisense to TP73	coding	chr1	-	NM_017818	3630767	3652761	10	1p36.3	49856	NM_017818	RefSeq	Homo sapiens WD repeat containing, antisense to TP73 (WRAP73), mRNA.	chr1	100	100	0	NA	NM_017818	Q9P2S5	NM_017818	Hs.31714	adipose tissue| ascites| blood| bone| bone marrow| brain| cervix| connective tissue| embryonic tissue| esophagus| eye| heart| intestine| kidney| liver| lung| lymph| lymph node| mammary gland| muscle| nerve| ovary| pancreas| placenta| prostate| skin| spleen| stomach| testis| thymus| thyroid| tonsil| trachea| uterus| vascular| breast (mammary gland) tumor| cervical tumor| chondrosarcoma| colorectal…	NA	NA	NA	NA	NM_017818	GO:0005737	cytoplasm	inferred from electronic annotation	ENST00000270708	GO:0005515	protein binding	inferred from electronic annotation	NA	NA	NA	ENST00000270708	Pfam	IPR001680	WD40 repeat	2.86203	2.08963
TC0100012602.hg.1	3.8839	4.51183	-1.54534	down	CEP104	centrosomal protein 104kDa	coding	chr1	-	NM_014704	3812081	3857233	10	1p36.32	9731	NM_014704	RefSeq	Homo sapiens centrosomal protein 104kDa (CEP104), mRNA.	chr1	100	100	0	NA	NM_014704	O60308	NM_014704	Hs.509017	adrenal gland| ascites| bladder| blood| bone| bone marrow| brain| cervix| connective tissue| embryonic tissue| esophagus| eye| heart| intestine| kidney| liver| lung| lymph node| mammary gland| muscle| ovary| pancreas| parathyroid| placenta| prostate| salivary gland| skin| spleen| stomach| testis| thymus| thyroid| uterus| vascular| bladder carcinoma| breast (mammary gland) tumor| cervical tumor| c…	NA	NA	NA	NA	NM_014704	GO:0005814	centriole	inferred from direct assay	NM_014704	GO:0005515	protein binding	inferred from physical interaction	NA	NA	NA	NA	NA	NA	NA	3.8839	4.51183
TC0100012604.hg.1	3.5151	4.68973	-2.25734	down	C1orf174	chromosome 1 open reading frame 174	coding	chr1	-	NM_207356	3889125	3900293	10	1p36.32	339448	NM_207356	RefSeq	Homo sapiens chromosome 1 open reading frame 174 (C1orf174), mRNA.	chr1	100	100	0	NA	NM_207356	Q8IYL3	NM_207356	Hs.103939	adrenal gland| ascites| bone| brain| cervix| connective tissue| embryonic tissue| eye| heart| intestine| kidney| liver| lung| mammary gland| mouth| muscle| pancreas| pharynx| placenta| prostate| skin| spleen| stomach| testis| uterus|adrenal tumor| breast (mammary gland) tumor| chondrosarcoma| colorectal tumor| gastrointestinal tumor| head and neck tumor| leukemia| liver tumor| non-neoplasia| norm…	NA	NA	NA	NA	NM_207356	GO:0005634	nucleus	inferred from direct assay	NM_207356	GO:0005515	protein binding	inferred from physical interaction	NA	NA	NA	NA	NA	NA	NA	3.5151	4.68973
TC0100012687.hg.1	4.49008	3.80458	1.60827	up	NOL9	nucleolar protein 9	coding	chr1	-	NM_024654	6521347	6554598	10	1p36.31	79707	NM_024654	RefSeq	Homo sapiens nucleolar protein 9 (NOL9), mRNA.	chr1	100	100	0	NA	NM_024654	Q5SY16	NM_024654	Hs.59425	adrenal gland| blood| bone| brain| cervix| connective tissue| embryonic tissue| eye| heart| intestine| kidney| larynx| liver| lung| lymph| lymph node| mammary gland| mouth| muscle| nerve| ovary| pancreas| placenta| prostate| skin| spleen| stomach| testis| thymus| thyroid| tonsil| uterus| vascular|adrenal tumor| cervical tumor| chondrosarcoma| colorectal tumor| gastrointestinal tumor| germ cell tu…	NM_024654	GO:0000448	cleavage in ITS2 between 5.8S rRNA and LSU-rRNA of tricistronic rRNA transcript (SSU-rRNA, 5.8S rRNA, LSU-rRNA)	not recorded	NM_024654	GO:0005634	nucleus	not recorded	NM_024654	GO:0003723	RNA binding	inferred from electronic annotation	NA	NA	NA	ENST00000377705	Pfam	IPR004435	Molybdopterin-guanine dinucleotide biosynthesis protein B (MobB) domain	4.49008	3.80458
TC0100013038.hg.1	2.89899	3.83778	-1.91693	down	FBXO42	F-box protein 42	coding	chr1	-	NM_018994	16246839	16352491	10	1p36.23-p36.11	54455	NM_018994	RefSeq	Homo sapiens F-box protein 42 (FBXO42), mRNA.	chr1	100	100	0	NA	NM_018994	Q6P3S6	NM_018994	Hs.522384	adrenal gland| bladder| blood| bone marrow| brain| cervix| connective tissue| ear| embryonic tissue| eye| heart| intestine| kidney| liver| lung| lymph node| mammary gland| mouth| muscle| pancreas| pharynx| placenta| prostate| skin| spleen| stomach| testis| thymus| thyroid| trachea| uterus|adrenal tumor| breast (mammary gland) tumor| colorectal tumor| germ cell tumor| glioma| head and neck tumor| …	NA	NA	NA	NA	NA	NA	NA	NA	ENST00000375592	GO:0005515	protein binding	inferred from electronic annotation	NA	NA	NA	ENST00000375592	Pfam	IPR001810	F-box domain	2.89899	3.83778
TC0100013042.hg.1	3.00817	2.35403	1.57368	up	SPATA21	spermatogenesis associated 21	coding	chr1	-	NM_198546	16387117	16437424	10	1p36.13	374955	NM_198546	RefSeq	Homo sapiens spermatogenesis associated 21 (SPATA21), mRNA.	chr1	100	100	0	NA	NM_198546	Q7Z572	NM_198546	Hs.705501	liver| testis| liver tumor| normal| fetus	NA	NA	NA	NA	NA	NA	NA	NA	NM_198546	GO:0005509	calcium ion binding	not recorded	NA	NA	NA	NA	NA	NA	NA	3.00817	2.35403
TC0100013193.hg.1	3.34935	4.07124	-1.64934	down	HP1BP3	heterochromatin protein 1, binding protein 3	coding	chr1	-	NM_016287	20742661	20787323	10	1p36.12	50809	NM_016287	RefSeq	Homo sapiens heterochromatin protein 1, binding protein 3 (HP1BP3), mRNA.	chr1	100	100	0	NA	NM_016287	Q5SSJ5	NM_016287	Hs.142442	adrenal gland| ascites| bladder| blood| bone| bone marrow| brain| cervix| connective tissue| ear| embryonic tissue| esophagus| eye| heart| intestine| kidney| larynx| liver| lung| lymph| lymph node| mammary gland| mouth| muscle| nerve| ovary| pancreas| parathyroid| pituitary gland| placenta| prostate| salivary gland| skin| stomach| testis| thymus| thyroid| trachea| umbilical cord| uterus| vascular…	NM_016287	GO:0006334	nucleosome assembly	inferred from electronic annotation	NM_016287	GO:0000786	nucleosome	inferred from electronic annotation	NM_016287	GO:0003677	DNA binding	inferred from direct assay	NA	NA	NA	ENST00000312239	Pfam	IPR005818	Linker histone H1/H5, domain H15	3.34935	4.07124
TC0100013272.hg.1	3.30225	4.19465	-1.85626	down	HTR1D	5-hydroxytryptamine (serotonin) receptor 1D, G protein-coupled	coding	chr1	-	NM_000864	23191895	23194729	10	1p36.3-p34.3	3352	NM_000864	RefSeq	Homo sapiens 5-hydroxytryptamine (serotonin) receptor 1D, G protein-coupled (HTR1D), mRNA.	chr1	100	100	0	NA	NM_000864	P28221	NM_000864	Hs.121482	brain| eye| intestine| colorectal tumor| glioma| normal| adult	NM_000864	GO:0007187	G-protein coupled receptor signaling pathway, coupled to cyclic nucleotide second messenger	traceable author statement	NM_000864	GO:0005886	plasma membrane	traceable author statement	NM_000864	GO:0004993	serotonin receptor activity	inferred from mutant phenotype	NM_000864	GenMAPP	GPCRDB_Class_A_Rhodopsin-like	ENST00000374619	Pfam	IPR000276	G protein-coupled receptor, rhodopsin-like	3.30225	4.19465
TC0100013371.hg.1	2.93251	3.67528	-1.67338	down	PAFAH2	platelet-activating factor acetylhydrolase 2	coding	chr1	-	NM_000437	25959767	25998157	10	1p36	5051	NM_000437	RefSeq	Homo sapiens platelet-activating factor acetylhydrolase 2, 40kDa (PAFAH2), mRNA.	chr1	100	100	0	NA	NM_000437	Q99487	NM_000437	Hs.477083	adrenal gland| blood| bone| brain| cervix| connective tissue| ear| embryonic tissue| eye| heart| intestine| kidney| larynx| lung| lymph| lymph node| mammary gland| muscle| ovary| pancreas| pharynx| placenta| prostate| skin| spleen| stomach| testis| thyroid| trachea| uterus| breast (mammary gland) tumor| cervical tumor| chondrosarcoma| colorectal tumor| germ cell tumor| head and neck tumor| kidney…	NM_000437	GO:0006629	lipid metabolic process	traceable author statement	NM_000437	GO:0005737	cytoplasm	inferred from electronic annotation	NM_000437	GO:0003847	1-alkyl-2-acetylglycerophosphocholine esterase activity	inferred from electronic annotation	NA	NA	NA	ENST00000374282	Pfam	IPR005065	Platelet-activating factor acetylhydrolase	2.93251	3.67528
TC0100013445.hg.1	7.51115	5.62899	3.68625	up	IFI6	interferon, alpha-inducible protein 6	coding	chr1	-	NM_002038	27666061	27672218	10	1p35	2537	NM_002038	RefSeq	Homo sapiens interferon, alpha-inducible protein 6 (IFI6), transcript variant 1, mRNA.	chr1	100	100	0	NA	NM_002038	P09912	NM_002038	Hs.523847	adrenal gland| blood| bone| brain| cervix| connective tissue| embryonic tissue| eye| heart| intestine| kidney| liver| lung| mammary gland| ovary| pancreas| placenta| prostate| salivary gland| skin| spleen| stomach| testis| uterus|adrenal tumor| breast (mammary gland) tumor| cervical tumor| chondrosarcoma| colorectal tumor| gastrointestinal tumor| germ cell tumor| glioma| head and neck tumor| kidn…	NM_002038	GO:0001836	release of cytochrome c from mitochondria	inferred from mutant phenotype	NM_002038	GO:0005739	mitochondrion	inferred from direct assay	NM_002038	GO:0005515	protein binding	inferred from physical interaction	NA	NA	NA	ENST00000339145	Pfam	IPR009311	Interferon alpha-inducible protein 6/27	7.51115	5.62899
TC0100013455.hg.1	3.93404	5.00532	-2.1013	down	RPA2	replication protein A2	coding	chr1	-	NM_001286076	27891524	27914797	10	1p35	6118	NM_001286076	RefSeq	Homo sapiens replication protein A2, 32kDa (RPA2), transcript variant 2, mRNA.	chr1	100	100	0	NA	NM_001286076	P15927	NM_001286076	Hs.79411	adrenal gland| ascites| bladder| blood| bone| bone marrow| brain| cervix| connective tissue| ear| embryonic tissue| eye| heart| intestine| kidney| larynx| liver| lung| lymph| lymph node| mammary gland| mouth| muscle| nerve| ovary| pancreas| parathyroid| pharynx| placenta| prostate| salivary gland| skin| spleen| stomach| testis| thymus| thyroid| tonsil| uterus| vascular|adrenal tumor| bladder carc…	NA	NA	NA	NA	NM_001286076	GO:0000781	chromosome, telomeric region	inferred from direct assay	NM_001286076	GO:0003684	damaged DNA binding	inferred from direct assay	NM_001286076	GenMAPP	DNA_replication_Reactome	ENST00000313433	Pfam	IPR004365	OB-fold nucleic acid binding domain, AA-tRNA synthetase-type	3.93404	5.00532
TC0100013545.hg.1	4.91079	3.66905	2.36485	up	SDC3	syndecan 3	coding	chr1	-	NM_014654	30869466	30908761	10	1p35.2	9672	NM_014654	RefSeq	Homo sapiens syndecan 3 (SDC3), mRNA.	chr1	100	100	0	NA	NM_014654	O75056	NM_014654	Hs.158287	adrenal gland| ascites| blood| bone| bone marrow| brain| cervix| connective tissue| embryonic tissue| esophagus| eye| heart| intestine| kidney| larynx| liver| lung| mammary gland| mouth| muscle| nerve| ovary| pancreas| placenta| prostate| skin| spleen| testis| thymus| thyroid| trachea| umbilical cord| uterus| breast (mammary gland) tumor| cervical tumor| chondrosarcoma| esophageal tumor| gastroin…	NM_014654	GO:0001523	retinoid metabolic process	traceable author statement	NM_014654	GO:0005796	Golgi lumen	traceable author statement	ENST00000339394	GO:0005515	protein binding	inferred from electronic annotation	NA	NA	NA	ENST00000336798	Pfam	IPR027789	Syndecan/Neurexin domain	4.91079	3.66905
TC0100013608.hg.1	6.78014	5.85947	1.893	up	MARCKSL1	MARCKS-like 1	coding	chr1	-	NM_023009	32333829	32336379	10	1p35.1	65108	NM_023009	RefSeq	Homo sapiens MARCKS-like 1 (MARCKSL1), transcript variant 1, mRNA.	chr1	100	100	0	NA	NM_023009	P49006	NM_023009	Hs.75061	adrenal gland| ascites| bladder| blood| bone| brain| cervix| connective tissue| ear| embryonic tissue| eye| heart| intestine| kidney| larynx| liver| lung| lymph| lymph node| mammary gland| mouth| muscle| nerve| ovary| pancreas| pharynx| placenta| prostate| salivary gland| skin| stomach| testis| thymus| thyroid| tonsil| umbilical cord| uterus| vascular|adrenal tumor| bladder carcinoma| breast (mam…	NM_023009	GO:0008284	positive regulation of cell proliferation	inferred from electronic annotation	NM_023009	GO:0005737	cytoplasm	inferred from electronic annotation	NM_023009	GO:0003779	actin binding	inferred from electronic annotation	NA	NA	NA	ENST00000329421	Pfam	IPR002101	Myristoylated alanine-rich C-kinase substrate MARCKS	6.78014	5.85947
TC0100013629.hg.1	4.66536	5.34337	-1.59992	down	YARS	tyrosyl-tRNA synthetase	coding	chr1	-	NM_003680	32775237	32818153	10	1p35.1	8565	NM_003680	RefSeq	Homo sapiens tyrosyl-tRNA synthetase (YARS), mRNA.	chr1	100	100	0	NA	NM_003680	P54577	NM_003680	Hs.213264	adipose tissue| adrenal gland| ascites| bladder| blood| bone| bone marrow| brain| cervix| connective tissue| embryonic tissue| esophagus| eye| heart| intestine| kidney| larynx| liver| lung| lymph| lymph node| mammary gland| mouth| muscle| nerve| ovary| pancreas| parathyroid| pharynx| placenta| prostate| skin| spleen| stomach| testis| thymus| thyroid| trachea| umbilical cord| uterus| vascular|adre…	NM_003680	GO:0006418	tRNA aminoacylation for protein translation	traceable author statement	NM_003680	GO:0005615	extracellular space	traceable author statement	NM_003680	GO:0000049	tRNA binding	inferred from electronic annotation	NM_003680	HumanCyc	TRNA-CHARGING-PWY	ENST00000373477	Pfam	IPR002305	Aminoacyl-tRNA synthetase, class Ic	4.66536	5.34337
TC0100013748.hg.1	5.07289	5.67	-1.51269	down	GNL2	guanine nucleotide binding protein-like 2 (nucleolar)	coding	chr1	-	NM_013285	37566812	37595985	10	1p34.3	29889	NM_013285	RefSeq	Homo sapiens guanine nucleotide binding protein-like 2 (nucleolar) (GNL2), mRNA.	chr1	100	100	0	NA	NM_013285	Q13823	NM_013285	Hs.75528	adipose tissue| adrenal gland| ascites| bladder| blood| bone| bone marrow| brain| cervix| connective tissue| embryonic tissue| esophagus| eye| heart| intestine| kidney| larynx| liver| lung| lymph| lymph node| mammary gland| mouth| muscle| nerve| ovary| pancreas| parathyroid| pharynx| placenta| prostate| skin| spleen| stomach| testis| thymus| thyroid| tonsil| trachea| umbilical cord| uterus| vascu…	NM_013285	GO:0042254	ribosome biogenesis	not recorded	NM_013285	GO:0005634	nucleus	traceable author statement	NM_013285	GO:0003924	GTPase activity	not recorded	NA	NA	NA	ENST00000373062	Pfam	IPR006073	GTP binding domain	5.07289	5.67
TC0100013757.hg.1	2.9698	3.87712	-1.87556	down	MTF1	metal-regulatory transcription factor 1	coding	chr1	-	NM_005955	37809567	37859620	10	1p33	4520	NM_005955	RefSeq	Homo sapiens metal-regulatory transcription factor 1 (MTF1), mRNA.	chr1	100	100	0	NA	NM_005955	Q14872	NM_005955	Hs.471991	adipose tissue| bladder| blood| bone| bone marrow| brain| cervix| connective tissue| embryonic tissue| esophagus| eye| heart| intestine| kidney| liver| lung| lymph| lymph node| mammary gland| mouth| muscle| nerve| ovary| pancreas| pharynx| placenta| prostate| skin| spleen| stomach| testis| thymus| thyroid| trachea| uterus| vascular| breast (mammary gland) tumor| cervical tumor| colorectal tumor| …	NM_005955	GO:0006357	regulation of transcription from RNA polymerase II promoter	traceable author statement	NM_005955	GO:0005634	nucleus	traceable author statement	NM_005955	GO:0000978	RNA polymerase II core promoter proximal region sequence-specific DNA binding	inferred from direct assay	NA	NA	NA	ENST00000373036	Pfam	IPR007087	Zinc finger, C2H2	2.9698	3.87712
TC0100013758.hg.1	2.77715	3.45832	-1.60343	down	INPP5B	inositol polyphosphate-5-phosphatase B	coding	chr1	-	NM_001297434	37860697	37947057	10	1p34	3633	NM_001297434	RefSeq	Homo sapiens inositol polyphosphate-5-phosphatase B (INPP5B), transcript variant 2, mRNA.	chr1	100	100	0	NA	NM_001297434	P32019	NM_001297434	Hs.449942	bladder| blood| brain| cervix| embryonic tissue| eye| heart| intestine| kidney| larynx| liver| lung| lymph| lymph node| mammary gland| mouth| muscle| pancreas| placenta| prostate| skin| stomach| testis| thymus| trachea| uterus| cervical tumor| colorectal tumor| gastrointestinal tumor| germ cell tumor| glioma| head and neck tumor| leukemia| liver tumor| lung tumor| lymphoma| normal| pancreatic tum…	NM_001297434	GO:0001701	in utero embryonic development	inferred from electronic annotation	NA	NA	NA	NA	NM_001297434	GO:0004439	phosphatidylinositol-4,5-bisphosphate 5-phosphatase activity	inferred from direct assay	NA	NA	NA	ENST00000373023	Pfam	IPR000198	Rho GTPase-activating protein domain	2.77715	3.45832
TC0100013818.hg.1	6.77357	7.46928	-1.61968	down	PPT1	palmitoyl-protein thioesterase 1	coding	chr1	-	NM_000310	40072705	40097703	10	1p32	5538	NM_000310	RefSeq	Homo sapiens palmitoyl-protein thioesterase 1 (PPT1), transcript variant 1, mRNA.	chr1	100	100	0	NA	NM_000310	P50897	NM_000310	Hs.3873	adipose tissue| adrenal gland| ascites| bladder| blood| bone| bone marrow| brain| cervix| connective tissue| ear| embryonic tissue| esophagus| eye| heart| intestine| kidney| liver| lung| lymph| lymph node| mammary gland| mouth| muscle| nerve| ovary| pancreas| parathyroid| pharynx| pituitary gland| placenta| prostate| salivary gland| skin| spleen| stomach| testis| thymus| thyroid| trachea| umbilic…	NA	NA	NA	NA	NA	NA	NA	NA	NM_000310	GO:0008474	palmitoyl-(protein) hydrolase activity	inferred from direct assay	NA	NA	NA	ENST00000372779	Pfam	IPR002472	Palmitoyl protein thioesterase	6.77357	7.46928
TC0100014188.hg.1	3.45939	4.26607	-1.74918	down	NRDC	nardilysin convertase	coding	chr1	-	NM_001101662	51789191	51878937	10	1p32.2-p32.1	4898	NM_001101662	RefSeq	Homo sapiens nardilysin (N-arginine dibasic convertase) (NRD1), transcript variant 2, mRNA.	chr1	100	100	0	NA	NM_001101662	O43847	NM_001101662	Hs.584782	adipose tissue| ascites| bladder| blood| bone| bone marrow| brain| cervix| connective tissue| ear| embryonic tissue| esophagus| eye| heart| intestine| kidney| larynx| liver| lung| lymph| lymph node| mammary gland| mouth| muscle| nerve| ovary| pancreas| parathyroid| pharynx| pituitary gland| placenta| prostate| salivary gland| skin| spleen| stomach| testis| thymus| thyroid| trachea| umbilical cord…	NM_001101662	GO:0006508	proteolysis	non-traceable author statement	NM_001101662	GO:0005829	cytosol	traceable author statement	NA	NA	NA	NA	NA	NA	NA	ENST00000352171	Pfam	IPR007863	Peptidase M16, C-terminal	3.45939	4.26607
TC0100014191.hg.1	4.55698	5.68818	-2.19041	down	RAB3B	RAB3B, member RAS oncogene family	coding	chr1	-	NM_002867	51907956	51990764	10	1p32-p31	5865	NM_002867	RefSeq	Homo sapiens RAB3B, member RAS oncogene family (RAB3B), mRNA.	chr1	100	100	0	NA	NM_002867	P20337	NM_002867	Hs.123072	adrenal gland| bone| bone marrow| brain| connective tissue| ear| embryonic tissue| eye| heart| intestine| kidney| liver| lung| mammary gland| mouth| muscle| nerve| pancreas| pituitary gland| placenta| prostate| skin| testis| thyroid| vascular|adrenal tumor| breast (mammary gland) tumor| chondrosarcoma| colorectal tumor| gastrointestinal tumor| germ cell tumor| glioma| head and neck tumor| kidney …	NM_002867	GO:0006886	intracellular protein transport	not recorded	NM_002867	GO:0005737	cytoplasm	inferred from direct assay	NM_002867	GO:0003924	GTPase activity	inferred from direct assay	NA	NA	NA	ENST00000371655	Pfam	IPR001806	Small GTPase superfamily	4.55698	5.68818
TC0100014210.hg.1	4.78046	5.38804	-1.5237	down	COA7	cytochrome c oxidase assembly factor 7 (putative)	coding	chr1	-	NM_023077	52684451	52698366	10	1p32.3	65260	NM_023077	RefSeq	Homo sapiens cytochrome c oxidase assembly factor 7 (putative) (COA7), mRNA.	chr1	100	100	0	NA	NM_023077	Q96BR5	NM_023077	Hs.349905	adipose tissue| adrenal gland| bone| bone marrow| brain| cervix| connective tissue| embryonic tissue| esophagus| eye| heart| intestine| kidney| liver| lung| mammary gland| muscle| ovary| pancreas| placenta| prostate| skin| testis| thyroid| vascular|adrenal tumor| breast (mammary gland) tumor| chondrosarcoma| colorectal tumor| esophageal tumor| gastrointestinal tumor| germ cell tumor| glioma| leuk…	NA	NA	NA	NA	NM_023077	GO:0005758	mitochondrial intermembrane space	inferred from electronic annotation	NA	NA	NA	NA	NA	NA	NA	ENST00000371538	Pfam	IPR006597	Sel1-like repeat	4.78046	5.38804
TC0100014228.hg.1	2.29602	2.95155	-1.5752	down	LRP8	LDL receptor related protein 8	coding	chr1	-	NM_001018054	53242364	53328149	10	1p34	7804	NM_001018054	RefSeq	Homo sapiens low density lipoprotein receptor-related protein 8, apolipoprotein e receptor (LRP8), transcript variant 4, mRNA.	chr1	100	100	0	NA	NM_001018054	Q14114	NM_001018054	Hs.280387	ascites| blood| bone| brain| cervix| embryonic tissue| eye| intestine| liver| lung| lymph| lymph node| mammary gland| mouth| nerve| pancreas| placenta| prostate| testis| thyroid| uterus| vascular| breast (mammary gland) tumor| cervical tumor| chondrosarcoma| colorectal tumor| gastrointestinal tumor| germ cell tumor| glioma| head and neck tumor| leukemia| liver tumor| lung tumor| lymphoma| non-neo…	NA	NA	NA	NA	NA	NA	NA	NA	NM_001018054	GO:0004888	transmembrane signaling receptor activity	traceable author statement	NA	NA	NA	ENST00000306052	Pfam	IPR000033	LDLR class B repeat	2.29602	2.95155
TC0100014279.hg.1	4.75384	5.45932	-1.63069	down	AL590440.1:18757..18829:rfam	tRNA-Lys-CTT-7-1	coding	chr1	-	AL590440.1:18757..18829:rfam	54957869	54957941	10	NA	NA	AL590440.1:18757..18829:rfam	RNACentral	tRNA-Lys-CTT-7-1	chr1	100	100	0	NA	NA	NA	NA	NA	NA	NA	NA	NA	NA	NA	NA	NA	NA	NA	NA	NA	NA	NA	NA	NA	NA	NA	NA	NA	4.75384	5.45932
TC0100014340.hg.1	5.39219	4.57938	1.75663	up	TACSTD2	tumor-associated calcium signal transducer 2	coding	chr1	-	NM_002353	58575423	58577773	10	1p32	4070	NM_002353	RefSeq	Homo sapiens tumor-associated calcium signal transducer 2 (TACSTD2), mRNA.	chr1	100	100	0	NA	NM_002353	P09758	NM_002353	Hs.23582	adipose tissue| ascites| bladder| bone| bone marrow| brain| cervix| connective tissue| embryonic tissue| esophagus| eye| heart| intestine| kidney| larynx| liver| lung| lymph node| mammary gland| mouth| muscle| ovary| pancreas| pharynx| placenta| prostate| skin| stomach| testis| thyroid| uterus| bladder carcinoma| breast (mammary gland) tumor| chondrosarcoma| colorectal tumor| esophageal tumor| ga…	NM_002353	GO:0007166	cell surface receptor signaling pathway	traceable author statement	NM_002353	GO:0005615	extracellular space	inferred from electronic annotation	NM_002353	GO:0004872	receptor activity	traceable author statement	NA	NA	NA	ENST00000371225	Pfam	IPR000716	Thyroglobulin type-1	5.39219	4.57938
TC0100014344.hg.1	3.19335	4.25367	-2.08539	down	MYSM1	Myb-like, SWIRM and MPN domains 1	coding	chr1	-	NM_001085487	58654739	58700092	10	1p32.1	114803	NM_001085487	RefSeq	Homo sapiens Myb-like, SWIRM and MPN domains 1 (MYSM1), mRNA.	chr1	100	100	0	NA	NM_001085487	Q5VVJ2	NM_001085487	Hs.744921	adipose tissue| blood| bone marrow| brain| embryonic tissue| eye| intestine| kidney| liver| lung| lymph| lymph node| mammary gland| mouth| muscle| nerve| pancreas| pharynx| placenta| prostate| stomach| testis| thymus| trachea| uterus| vascular| breast (mammary gland) tumor| colorectal tumor| germ cell tumor| glioma| head and neck tumor| leukemia| liver tumor| lung tumor| lymphoma| non-neoplasia| …	NM_001085487	GO:0006338	chromatin remodeling	inferred from mutant phenotype	NM_001085487	GO:0005634	nucleus	inferred from direct assay	NM_001085487	GO:0003677	DNA binding	inferred from electronic annotation	NA	NA	NA	ENST00000472487	Pfam	IPR000555	JAB1/MPN/MOV34 metalloenzyme domain	3.19335	4.25367
TC0100014408.hg.1	1.57721	2.33141	-1.68669	down	DOCK7	dedicator of cytokinesis 7	coding	chr1	-	NM_001271999	62454726	62688368	10	1p31.3	85440	NM_001271999	RefSeq	Homo sapiens dedicator of cytokinesis 7 (DOCK7), transcript variant 1, mRNA.	chr1	100	100	0	NA	NM_001271999	Q96N67	NM_001271999	Hs.744927	adipose tissue| ascites| bladder| blood| bone| brain| connective tissue| ear| embryonic tissue| eye| heart| intestine| kidney| liver| lung| lymph node| mammary gland| mouth| muscle| nerve| ovary| pancreas| pituitary gland| placenta| prostate| skin| stomach| testis| thymus| thyroid| trachea| uterus| vascular| bladder carcinoma| breast (mammary gland) tumor| chondrosarcoma| colorectal tumor| gastro…	NA	NA	NA	NA	NM_001271999	GO:0005925	focal adhesion	inferred from direct assay	NM_001271999	GO:0005085	guanyl-nucleotide exchange factor activity	inferred from electronic annotation	NA	NA	NA	ENST00000251157	Pfam	IPR010703	Dedicator of cytokinesis C-terminal	1.57721	2.33141
TC0100014531.hg.1	6.17891	6.9452	-1.70088	down	WLS	wntless Wnt ligand secretion mediator	coding	chr1	-	NM_001002292	68098459	68233120	10	1p31.3	79971	NM_001002292	RefSeq	Homo sapiens wntless Wnt ligand secretion mediator (WLS), transcript variant 2, mRNA.	chr1	100	100	0	NA	NM_001002292	Q5T9L3	NM_001002292	Hs.647659	adipose tissue| adrenal gland| ascites| bladder| blood| bone| bone marrow| brain| cervix| connective tissue| ear| embryonic tissue| esophagus| eye| heart| intestine| kidney| liver| lung| mammary gland| mouth| muscle| ovary| parathyroid| pharynx| placenta| prostate| salivary gland| skin| spleen| stomach| testis| thymus| trachea| umbilical cord| uterus| vascular|adrenal tumor| bladder carcinoma| br…	NA	NA	NA	NA	NA	NA	NA	NA	NM_001002292	GO:0004871	signal transducer activity	inferred from sequence or structural similarity	NA	NA	NA	NA	NA	NA	NA	6.17891	6.9452
TC0100014543.hg.1	3.60348	4.94437	-2.53308	down	DEPDC1	DEP domain containing 1	coding	chr1	-	NM_001114120	68474152	68497221	10	1p31.2	55635	NM_001114120	RefSeq	Homo sapiens DEP domain containing 1 (DEPDC1), transcript variant 1, mRNA.	chr1	100	100	0	NA	NM_001114120	Q5TB30	NM_001114120	Hs.445098	ascites| blood| bone| bone marrow| brain| connective tissue| embryonic tissue| esophagus| eye| intestine| kidney| liver| lung| lymph| lymph node| mammary gland| mouth| nerve| ovary| placenta| prostate| salivary gland| skin| stomach| testis| thymus| umbilical cord| uterus| vascular| breast (mammary gland) tumor| esophageal tumor| gastrointestinal tumor| germ cell tumor| head and neck tumor| kidney…	NM_001114120	GO:0006351	transcription, DNA-templated	inferred from electronic annotation	NM_001114120	GO:0005634	nucleus	inferred from direct assay	NM_001114120	GO:0005096	GTPase activator activity	inferred from electronic annotation	NA	NA	NA	ENST00000370966	Pfam	IPR000198	Rho GTPase-activating protein domain	3.60348	4.94437
TC0100014585.hg.1	4.92275	6.19776	-2.42001	down	NEGR1	neuronal growth regulator 1	coding	chr1	-	NM_173808	71395940	72282734	10	1p31.1	257194	NM_173808	RefSeq	Homo sapiens neuronal growth regulator 1 (NEGR1), mRNA.	chr1	100	100	0	NA	NM_173808	Q7Z3B1	NM_173808	Hs.146542	adipose tissue| adrenal gland| bone| brain| connective tissue| embryonic tissue| eye| kidney| lung| mammary gland| mouth| pancreas| prostate| testis| thymus| trachea| uterus| vascular|adrenal tumor| breast (mammary gland) tumor| chondrosarcoma| germ cell tumor| head and neck tumor| non-neoplasia| normal| pancreatic tumor| primitive neuroectodermal tumor of the CNS| soft tissue/muscle tissue tumor…	NM_173808	GO:0007626	locomotory behavior	inferred from electronic annotation	NM_173808	GO:0005886	plasma membrane	inferred from electronic annotation	NM_173808	GO:0005515	protein binding	inferred from physical interaction	NA	NA	NA	ENST00000306821	Pfam	IPR013098	Immunoglobulin I-set	4.92275	6.19776
TC0100014612.hg.1	3.51365	4.50999	-1.99493	down	CRYZ	crystallin zeta	coding	chr1	-	NM_001130042	74705482	74733408	10	1p31.1	1429	NM_001130042	RefSeq	Homo sapiens crystallin, zeta (quinone reductase) (CRYZ), transcript variant 1, mRNA.	chr1	100	100	0	NA	NM_001130042	Q08257	NM_001130042	Hs.83114	adipose tissue| adrenal gland| ascites| bladder| blood| bone| bone marrow| brain| cervix| connective tissue| embryonic tissue| eye| heart| intestine| kidney| liver| lung| lymph node| mouth| muscle| ovary| pancreas| parathyroid| pharynx| pituitary gland| placenta| prostate| salivary gland| skin| spleen| stomach| testis| thyroid| umbilical cord| uterus| vascular| bladder carcinoma| cervical tumor| …	NM_001130042	GO:0007601	visual perception	traceable author statement	NM_001130042	GO:0005737	cytoplasm	inferred from direct assay	NM_001130042	GO:0003730	mRNA 3'-UTR binding	inferred from direct assay	NA	NA	NA	ENST00000340866	Pfam	IPR013149	Alcohol dehydrogenase, C-terminal	3.51365	4.50999
TC0100014653.hg.1	4.06994	4.7131	-1.56175	down	USP33	ubiquitin specific peptidase 33	coding	chr1	-	NM_015017	77695987	77759879	10	1p31.1	23032	NM_015017	RefSeq	Homo sapiens ubiquitin specific peptidase 33 (USP33), transcript variant 1, mRNA.	chr1	100	100	0	NA	NM_015017	Q8TEY7	NA	NA	NA	NA	NA	NA	NA	NA	NA	NA	NA	NA	NA	NA	NA	NA	NA	NA	ENST00000357428	Pfam	IPR001394	Peptidase C19, ubiquitin carboxyl-terminal hydrolase	4.06994	4.7131
TC0100014660.hg.1	3.8987	5.18163	-2.43332	down	FUBP1	far upstream element (FUSE) binding protein 1	coding	chr1	-	NM_001303433	77944055	77979205	10	1p31.1	8880	NM_001303433	RefSeq	Homo sapiens far upstream element (FUSE) binding protein 1 (FUBP1), transcript variant 1, mRNA.	chr1	100	100	0	NA	NM_001303433	Q96AE4	NM_001303433	Hs.567380	adipose tissue| adrenal gland| ascites| bladder| blood| bone| bone marrow| brain| cervix| connective tissue| ear| embryonic tissue| esophagus| eye| heart| intestine| kidney| larynx| liver| lung| lymph| lymph node| mammary gland| mouth| muscle| nerve| ovary| pancreas| parathyroid| pharynx| placenta| prostate| salivary gland| skin| spleen| stomach| testis| thymus| thyroid| tonsil| umbilical cord| u…	NM_001303433	GO:0006366	transcription from RNA polymerase II promoter	inferred from electronic annotation	NM_001303433	GO:0005634	nucleus	inferred from direct assay	NM_001303433	GO:0001205	transcriptional activator activity, RNA polymerase II distal enhancer sequence-specific binding	inferred from electronic annotation	NA	NA	NA	ENST00000370767	Pfam	IPR004088	K Homology domain, type 1	3.8987	5.18163
TC0100014776.hg.1	6.41397	7.01332	-1.51503	down	DDAH1	dimethylarginine dimethylaminohydrolase 1	coding	chr1	-	NM_001134445	85318481	85578363	10	1p22	23576	NM_001134445	RefSeq	Homo sapiens dimethylarginine dimethylaminohydrolase 1 (DDAH1), transcript variant 2, mRNA.	chr1	100	100	0	NA	NM_001134445	O94760	NM_001134445	Hs.713411	adrenal gland| bladder| bone| bone marrow| brain| connective tissue| embryonic tissue| eye| heart| intestine| kidney| liver| lung| mammary gland| muscle| nerve| ovary| pancreas| parathyroid| prostate| skin| spleen| stomach| testis| thymus| thyroid| trachea| uterus| vascular| bladder carcinoma| breast (mammary gland) tumor| chondrosarcoma| colorectal tumor| gastrointestinal tumor| germ cell tumor|…	NM_001134445	GO:0000052	citrulline metabolic process	inferred from direct assay	NM_001134445	GO:0005739	mitochondrion	inferred from electronic annotation	NM_001134445	GO:0003824	catalytic activity	traceable author statement	NA	NA	NA	ENST00000284031	Pfam	IPR003198	Amidinotransferase	6.41397	7.01332
TC0100014852.hg.1	2.34533	3.01129	-1.58663	down	GBP1	guanylate binding protein 1, interferon-inducible	coding	chr1	-	NM_002053	89052304	89065360	10	1p22.2	2633	NM_002053	RefSeq	Homo sapiens guanylate binding protein 1, interferon-inducible (GBP1), mRNA.	chr1	100	100	0	NA	NM_002053	P32455	NM_002053	Hs.62661	adipose tissue| adrenal gland| bladder| blood| bone| bone marrow| brain| connective tissue| embryonic tissue| esophagus| eye| heart| intestine| kidney| larynx| liver| lung| lymph node| mammary gland| muscle| nerve| ovary| pancreas| pharynx| placenta| prostate| skin| spleen| stomach| testis| thymus| thyroid| trachea| umbilical cord| uterus| vascular|adrenal tumor| breast (mammary gland) tumor| cho…	NM_002053	GO:0008152	metabolic process	inferred from electronic annotation	NM_002053	GO:0000139	Golgi membrane	inferred from electronic annotation	NM_002053	GO:0003779	actin binding	inferred from direct assay	NA	NA	NA	ENST00000370473	Pfam	IPR003191	Guanylate-binding protein, C-terminal	2.34533	3.01129
TC0100014918.hg.1	3.12783	3.90221	-1.71046	down	SETSIP	SET-like protein	coding	chr1	-	NM_001287737	92074436	92075472	10	1p22.1	646817	NM_001287737	RefSeq	Homo sapiens SET-like protein (SETSIP), mRNA.	chr1	100	100	0	NA	NM_001287737	P0DME0	NA	NA	NA	NM_001287737	GO:0006334	nucleosome assembly	inferred from electronic annotation	NM_001287737	GO:0005634	nucleus	inferred from direct assay	NM_001287737	GO:0003682	chromatin binding	inferred from direct assay	NA	NA	NA	ENST00000485873	Pfam	IPR002164	Nucleosome assembly protein (NAP)	3.12783	3.90221
TC0100014947.hg.1	6.06111	6.76082	-1.62418	down	TMED5	transmembrane p24 trafficking protein 5	coding	chr1	-	NM_001167830	93149742	93180728	10	1p22.1	50999	NM_001167830	RefSeq	Homo sapiens transmembrane p24 trafficking protein 5 (TMED5), transcript variant 2, mRNA.	chr1	100	100	0	NA	NM_001167830	Q9Y3A6	NM_001167830	Hs.482873	adipose tissue| adrenal gland| ascites| bladder| blood| bone| bone marrow| brain| cervix| connective tissue| ear| embryonic tissue| esophagus| eye| heart| intestine| kidney| liver| lung| lymph| lymph node| mammary gland| mouth| muscle| ovary| pancreas| parathyroid| pharynx| pituitary gland| placenta| prostate| salivary gland| skin| spleen| stomach| testis| thymus| thyroid| trachea| umbilical cord…	NM_001167830	GO:0015031	protein transport	inferred from electronic annotation	NM_001167830	GO:0005789	endoplasmic reticulum membrane	inferred from electronic annotation	NM_001167830	GO:0005515	protein binding	inferred from physical interaction	NA	NA	NA	ENST00000370280	Pfam	IPR009038	GOLD domain	6.06111	6.76082
TC0100014966.hg.1	3.08467	3.72918	-1.56321	down	GCLM	glutamate-cysteine ligase, modifier subunit	coding	chr1	-	NM_001308253	93885200	93909598	10	1p22.1	2730	NM_001308253	RefSeq	Homo sapiens glutamate-cysteine ligase, modifier subunit (GCLM), transcript variant 2, mRNA.	chr1	100	100	0	NA	NM_001308253	P48507	NM_001308253	Hs.315562	ascites| bladder| blood| bone| bone marrow| brain| cervix| connective tissue| ear| embryonic tissue| eye| intestine| kidney| larynx| liver| lung| lymph| lymph node| mammary gland| mouth| muscle| ovary| pancreas| parathyroid| pharynx| placenta| prostate| skin| testis| thyroid| uterus| vascular| bladder carcinoma| cervical tumor| chondrosarcoma| gastrointestinal tumor| germ cell tumor| glioma| head…	NM_001308253	GO:0000096	sulfur amino acid metabolic process	traceable author statement	NM_001308253	GO:0005829	cytosol	non-traceable author statement	NM_001308253	GO:0004357	glutamate-cysteine ligase activity	inferred from direct assay	NA	NA	NA	ENST00000370238	Pfam	IPR023210	NADP-dependent oxidoreductase domain	3.08467	3.72918
TC0100015049.hg.1	1.38291	1.98957	-1.52273	down	FRRS1	ferric-chelate reductase 1	coding	chr1	-	NM_001013660	99708703	99766631	10	1p21.2	391059	NM_001013660	RefSeq	Homo sapiens ferric-chelate reductase 1 (FRRS1), mRNA.	chr1	100	100	0	NA	NM_001013660	Q6ZNA5	NM_001013660	Hs.454779	bladder| connective tissue| liver| mouth| placenta| bladder carcinoma| germ cell tumor| head and neck tumor| non-neoplasia| normal| adult	NM_001013660	GO:0055114	oxidation-reduction process	inferred from electronic annotation	NM_001013660	GO:0016021	integral component of membrane	inferred from electronic annotation	NM_001013660	GO:0000293	ferric-chelate reductase activity	inferred from sequence or structural similarity	NA	NA	NA	ENST00000287474	Pfam	IPR002861	Reeler domain	1.38291	1.98957
TC0100015200.hg.1	3.09923	4.05585	-1.94076	down	AMIGO1	adhesion molecule with Ig-like domain 1	coding	chr1	-	NM_020703	109504175	109509738	10	1p13.3	57463	NM_020703	RefSeq	Homo sapiens adhesion molecule with Ig-like domain 1 (AMIGO1), mRNA.	chr1	100	100	0	NA	NM_020703	Q86WK6	NM_020703	Hs.726479	bone| brain| eye| kidney| ovary| prostate| testis| thymus| thyroid| trachea| head and neck tumor| leukemia| normal| adult	NM_020703	GO:0007156	homophilic cell adhesion via plasma membrane adhesion molecules	inferred from sequence or structural similarity	NM_020703	GO:0008076	voltage-gated potassium channel complex	inferred from sequence or structural similarity	NM_020703	GO:0015459	potassium channel regulator activity	inferred from sequence or structural similarity	NA	NA	NA	ENST00000369862	Pfam	IPR001611	Leucine-rich repeat	3.09923	4.05585
TC0100015211.hg.1	3.52217	4.19326	-1.59227	down	GSTM3	glutathione S-transferase mu 3 (brain)	coding	chr1	-	NM_000849	109733932	109741038	10	1p13.3	2947	NM_000849	RefSeq	Homo sapiens glutathione S-transferase mu 3 (brain) (GSTM3), transcript variant 1, mRNA.	chr1	100	100	0	NA	NM_000849	P21266	NM_000849	Hs.2006	adipose tissue| adrenal gland| ascites| bladder| blood| bone| brain| cervix| connective tissue| embryonic tissue| eye| heart| intestine| kidney| liver| lung| lymph node| mammary gland| mouth| muscle| nerve| ovary| pancreas| parathyroid| pituitary gland| placenta| prostate| skin| stomach| testis| thyroid| trachea| uterus| vascular| bladder carcinoma| breast (mammary gland) tumor| cervical tumor| c…	NM_000849	GO:0006749	glutathione metabolic process	inferred from direct assay	NM_000849	GO:0005634	nucleus	inferred from direct assay	NM_000849	GO:0004364	glutathione transferase activity	inferred from direct assay	NM_000849	GenMAPP	Circadian_Exercise	ENST00000256594	Pfam	IPR004045	Glutathione S-transferase, N-terminal	3.52217	4.19326
TC0100015243.hg.1	4.3257	3.57655	1.6808	up	KCNA10	potassium channel, voltage gated shaker related subfamily A, member 10	coding	chr1	-	NM_005549	110517217	110519175	10	1p13.1	3744	NM_005549	RefSeq	Homo sapiens potassium channel, voltage gated shaker related subfamily A, member 10 (KCNA10), mRNA.	chr1	100	100	0	NA	NM_005549	Q16322	NM_005549	Hs.248140	NA	NM_005549	GO:0006813	potassium ion transport	traceable author statement	NM_005549	GO:0005886	plasma membrane	traceable author statement	NM_005549	GO:0005221	intracellular cyclic nucleotide activated cation channel activity	traceable author statement	NA	NA	NA	ENST00000369771	Pfam	IPR003131	Potassium channel tetramerisation-type BTB domain	4.3257	3.57655
TC0100015299.hg.1	6.14691	6.8319	-1.6077	down	ST7L	suppression of tumorigenicity 7 like	coding	chr1	-	NM_001308264	112523518	112620825	10	1p13.2	54879	NM_001308264	RefSeq	Homo sapiens suppression of tumorigenicity 7 like (ST7L), transcript variant 7, mRNA.	chr1	100	100	0	NA	NM_001308264	Q8TDW4	NA	NA	NA	NM_001308264	GO:0030308	negative regulation of cell growth	inferred from sequence or structural similarity	NM_001308264	GO:0016021	integral component of membrane	inferred from electronic annotation	NA	NA	NA	NA	NA	NA	NA	ENST00000343210	Pfam	IPR007311	ST7	6.14691	6.8319
TC0100015332.hg.1	3.32659	3.98882	-1.58252	down	RSBN1	round spermatid basic protein 1	coding	chr1	-	NM_018364	113761832	113812476	10	1p13.2	54665	NM_018364	RefSeq	Homo sapiens round spermatid basic protein 1 (RSBN1), transcript variant 1, mRNA.	chr1	100	100	0	NA	NM_018364	Q5VWQ0	NM_018364	Hs.486285	adipose tissue| ascites| bladder| blood| bone| bone marrow| brain| cervix| connective tissue| ear| embryonic tissue| esophagus| eye| intestine| kidney| liver| lung| lymph| lymph node| mammary gland| mouth| muscle| ovary| pancreas| parathyroid| pituitary gland| placenta| prostate| skin| spleen| stomach| testis| thymus| thyroid| trachea| uterus| vascular| bladder carcinoma| cervical tumor| chondros…	NA	NA	NA	NA	NM_018364	GO:0005634	nucleus	inferred from electronic annotation	ENST00000261441	GO:0005515	protein binding	inferred from electronic annotation	NA	NA	NA	NA	NA	NA	NA	3.32659	3.98882
TC0100015368.hg.1	2.63126	3.63904	-2.01081	down	NGF	nerve growth factor (beta polypeptide)	coding	chr1	-	NM_002506	115285916	115338236	10	1p13.1	4803	NM_002506	RefSeq	Homo sapiens nerve growth factor (beta polypeptide) (NGF), mRNA.	chr1	100	100	0	NA	NM_002506	P01138	NM_002506	Hs.2561	eye| intestine| lung| muscle| skin| spleen| germ cell tumor| normal| ovarian tumor| retinoblastoma| fetus	NM_002506	GO:0000186	activation of MAPKK activity	traceable author statement	NM_002506	GO:0005576	extracellular region	traceable author statement	NM_002506	GO:0005057	receptor signaling protein activity	inferred from electronic annotation	NM_002506	GenMAPP	Apoptosis_KEGG	ENST00000369512	Pfam	IPR002072	Nerve growth factor-related	2.63126	3.63904
TC0100015434.hg.1	3.30106	3.93651	-1.55342	down	GDAP2	ganglioside induced differentiation associated protein 2	coding	chr1	-	NM_001135589	117863485	117929679	10	1p12	54834	NM_001135589	RefSeq	Homo sapiens ganglioside induced differentiation associated protein 2 (GDAP2), transcript variant 2, mRNA.	chr1	100	100	0	NA	NM_001135589	Q9NXN4	NM_001135589	Hs.594430	ascites| bladder| blood| bone marrow| brain| cervix| connective tissue| embryonic tissue| esophagus| eye| intestine| kidney| liver| lung| lymph node| mammary gland| mouth| muscle| ovary| pancreas| parathyroid| pharynx| placenta| prostate| skin| spleen| testis| thymus| thyroid| trachea| uterus| vascular| breast (mammary gland) tumor| cervical tumor| colorectal tumor| esophageal tumor| gastrointest…	NM_001135589	GO:0032526	response to retinoic acid	inferred from electronic annotation	NM_001135589	GO:0005765	lysosomal membrane	inferred from direct assay	NM_001135589	GO:0005515	protein binding	inferred from physical interaction	NA	NA	NA	ENST00000369442	Pfam	IPR001251	CRAL-TRIO lipid binding domain	3.30106	3.93651
TC0100015483.hg.1	3.61715	4.26983	-1.57209	down	NOTCH2	notch 2	coding	chr1	-	NM_001200001	119911553	120069703	10	1p13-p11	4853	NM_001200001	RefSeq	Homo sapiens notch 2 (NOTCH2), transcript variant 2, mRNA.	chr1	100	100	0	NA	NM_001200001	Q04721	NM_001200001	Hs.487360	adipose tissue| adrenal gland| ascites| bladder| blood| bone| bone marrow| brain| cervix| connective tissue| ear| embryonic tissue| esophagus| eye| heart| intestine| kidney| larynx| liver| lung| lymph| lymph node| mammary gland| mouth| muscle| nerve| ovary| pancreas| parathyroid| pharynx| placenta| prostate| skin| spleen| stomach| testis| thymus| thyroid| trachea| uterus| vascular| bladder carcin…	NA	NA	NA	NA	NM_001200001	GO:0000139	Golgi membrane	traceable author statement	NM_001200001	GO:0004872	receptor activity	non-traceable author statement	NA	NA	NA	ENST00000256646	Pfam	IPR000742	EGF-like domain	3.61715	4.26983
TC0100015509.hg.1	2.188	3.41695	-2.34397	down	FAM72B	family with sequence similarity 72, member B	coding	chr1	-	NM_001100910	121167646	121185539	10	1p11.2	653820	NM_001100910	RefSeq	Homo sapiens family with sequence similarity 72, member B (FAM72B), mRNA.	chr1	100	100	0	NA	NM_001100910	Q86X60	NM_001100910	Hs.339665	adrenal gland| ascites| blood| bone| brain| connective tissue| embryonic tissue| intestine| kidney| larynx| lung| lymph| lymph node| mammary gland| pharynx| placenta| prostate| skin| spleen| testis| uterus| vascular|adrenal tumor| breast (mammary gland) tumor| chondrosarcoma| gastrointestinal tumor| germ cell tumor| glioma| head and neck tumor| kidney tumor| lung tumor| lymphoma| normal| primitiv…	NA	NA	NA	NA	NM_001100910	GO:0005737	cytoplasm	inferred from direct assay	NA	NA	NA	NA	NA	NA	NA	ENST00000355228	Pfam	IPR026768	Protein FAM72	2.188	3.41695
TC0100015550.hg.1	2.90245	4.35325	-2.73359	down	FAM72C	family with sequence similarity 72, member C	coding	chr1	-	NM_001287385	143944179	143972006	10	1q21.1	554282	NM_001287385	RefSeq	Homo sapiens family with sequence similarity 72, member C (FAM72C), mRNA.	chr1	100	100	0	NA	NM_001287385	H0Y354	NM_001287385	Hs.568238	embryonic tissue| lung| skin| spleen| testis| germ cell tumor| lung tumor| normal| skin tumor| fetus| adult	NA	NA	NA	NA	NM_001287385	GO:0005737	cytoplasm	inferred from direct assay	NA	NA	NA	NA	NA	NA	NA	ENST00000369175	Pfam	IPR026768	Protein FAM72	2.90245	4.35325
TC0100015572.hg.1	5.64422	6.27924	-1.55296	down	SRGAP2B	SLIT-ROBO Rho GTPase activating protein 2B	coding	chr1	-	NM_001271870	144887191	145095528	10	1q21.1	647135	NM_001271870	RefSeq	Homo sapiens SLIT-ROBO Rho GTPase activating protein 2B (SRGAP2B), mRNA.	chr1	100	100	0	NA	NM_001271870	P0DJJ0	NM_001271870	Hs.497575	adipose tissue| adrenal gland| ascites| blood| bone| brain| cervix| connective tissue| ear| embryonic tissue| eye| heart| intestine| kidney| larynx| liver| lung| lymph node| mammary gland| mouth| muscle| nerve| ovary| pancreas| placenta| prostate| skin| spleen| stomach| testis| thymus| thyroid| tonsil| trachea| umbilical cord| uterus| vascular|adrenal tumor| bladder carcinoma| breast (mammary gla…	NM_001271870	GO:0007399	nervous system development	inferred from electronic annotation	NM_001271870	GO:0005634	nucleus	inferred from electronic annotation	NM_001271870	GO:0042803	protein homodimerization activity	inferred from physical interaction	NA	NA	NA	ENST00000612199	Pfam	IPR001060	FCH domain	5.64422	6.27924
TC0100015597.hg.1	4.46001	3.77188	1.61119	up	ANKRD34A	ankyrin repeat domain 34A	coding	chr1	-	NM_001039888	145959441	145964582	10	1q21.1	284615	NM_001039888	RefSeq	Homo sapiens ankyrin repeat domain 34A (ANKRD34A), mRNA.	chr1	100	100	0	NA	NM_001039888	Q69YU3	NM_001039888	Hs.620591	bone| brain| eye| intestine| kidney| liver| lung| mammary gland| prostate| skin| testis| chondrosarcoma| germ cell tumor| glioma| kidney tumor| liver tumor| normal| primitive neuroectodermal tumor of the CNS| fetus| juvenile| adult	NA	NA	NA	NA	ENST00000606888	GO:0005737	cytoplasm	inferred from direct assay	ENST00000606888	GO:0005515	protein binding	inferred from electronic annotation	NA	NA	NA	ENST00000606888	Pfam	IPR020683	Ankyrin repeat-containing domain	4.46001	3.77188
TC0100015750.hg.1	0.85884	1.45634	-1.51309	down	HORMAD1	HORMA domain containing 1	coding	chr1	-	NM_001199829	150698059	150720888	10	1q21.3	84072	NM_001199829	RefSeq	Homo sapiens HORMA domain containing 1 (HORMAD1), transcript variant 2, mRNA.	chr1	100	100	0	NA	NM_001199829	Q86X24	NM_001199829	Hs.298312	brain| lung| mammary gland| prostate| testis| trachea| germ cell tumor| lung tumor| normal| adult	NA	NA	NA	NA	NM_001199829	GO:0000795	synaptonemal complex	inferred from electronic annotation	ENST00000361824	GO:0005515	protein binding	inferred from electronic annotation	NA	NA	NA	ENST00000322343	Pfam	IPR003511	HORMA domain	0.85884	1.45634
TC0100015752.hg.1	3.35355	2.11059	2.36684	up	CTSS	cathepsin S	coding	chr1	-	NM_001199739	150730196	150765957	10	1q21	1520	NM_001199739	RefSeq	Homo sapiens cathepsin S (CTSS), transcript variant 2, mRNA.	chr1	100	100	0	NA	NM_001199739	P25774	NM_001199739	Hs.181301	adipose tissue| adrenal gland| ascites| bladder| blood| bone marrow| brain| cervix| connective tissue| ear| esophagus| eye| heart| intestine| kidney| liver| lung| lymph| lymph node| mammary gland| mouth| muscle| ovary| pancreas| pharynx| placenta| prostate| salivary gland| skin| spleen| stomach| testis| thymus| tonsil| trachea| uterus| vascular|adrenal tumor| bladder carcinoma| breast (mammary gl…	NA	NA	NA	NA	NM_001199739	GO:0005576	extracellular region	non-traceable author statement	NM_001199739	GO:0001968	fibronectin binding	inferred from physical interaction	NA	NA	NA	ENST00000368985	Pfam	IPR000668	Peptidase C1A, papain C-terminal	3.35355	2.11059
TC0100015783.hg.1	3.35017	4.1617	-1.75508	down	RFX5	regulatory factor X, 5 (influences HLA class II expression)	coding	chr1	-	NM_000449	151340640	151347357	10	1q21	5993	NM_000449	RefSeq	Homo sapiens regulatory factor X, 5 (influences HLA class II expression) (RFX5), transcript variant 1, mRNA.	chr1	100	100	0	NA	NM_000449	P48382	NA	NA	NA	NM_000449	GO:0000122	negative regulation of transcription from RNA polymerase II promoter	inferred from electronic annotation	NM_000449	GO:0005634	nucleus	inferred from electronic annotation	NA	NA	NA	NA	NA	NA	NA	ENST00000290524	Pfam	IPR003150	DNA-binding RFX-type winged-helix domain	3.35017	4.1617
TC0100015815.hg.1	2.90758	2.27903	1.54601	up	THEM5	thioesterase superfamily member 5	coding	chr1	-	NM_182578	151847101	151853697	10	1q21.3	284486	NM_182578	RefSeq	Homo sapiens thioesterase superfamily member 5 (THEM5), mRNA.	chr1	100	100	0	NA	NM_182578	Q8N1Q8	NM_182578	Hs.132648	eye| larynx| mouth| skin| head and neck tumor| non-neoplasia| normal| fetus| adult	NM_182578	GO:0006631	fatty acid metabolic process	inferred from electronic annotation	NM_182578	GO:0005759	mitochondrial matrix	inferred from direct assay	NM_182578	GO:0005515	protein binding	inferred from physical interaction	NA	NA	NA	ENST00000368817	Pfam	IPR006683	Thioesterase superfamily	2.90758	2.27903
TC0100015817.hg.1	4.03376	4.87789	-1.79519	down	THEM4	thioesterase superfamily member 4	coding	chr1	-	NM_053055	151870867	151909885	10	1q21	117145	NM_053055	RefSeq	Homo sapiens thioesterase superfamily member 4 (THEM4), mRNA.	chr1	100	100	0	NA	NM_053055	Q5T1C6	NM_053055	Hs.164070	ascites| bone| brain| cervix| connective tissue| embryonic tissue| esophagus| eye| heart| intestine| kidney| liver| lung| lymph node| mammary gland| muscle| ovary| pancreas| pituitary gland| placenta| prostate| skin| spleen| testis| thymus| thyroid| uterus| breast (mammary gland) tumor| cervical tumor| chondrosarcoma| colorectal tumor| gastrointestinal tumor| germ cell tumor| glioma| head and nec…	NM_053055	GO:0006631	fatty acid metabolic process	inferred from direct assay	NM_053055	GO:0005739	mitochondrion	inferred from direct assay	NM_053055	GO:0016290	palmitoyl-CoA hydrolase activity	inferred from direct assay	NA	NA	NA	ENST00000368814	Pfam	IPR006683	Thioesterase superfamily	4.03376	4.87789
TC0100015835.hg.1	3.43099	2.34672	2.12029	up	LCE3E	late cornified envelope 3E	coding	chr1	-	NM_178435	152565654	152566772	10	1q21.3	353145	NM_178435	RefSeq	Homo sapiens late cornified envelope 3E (LCE3E), mRNA.	chr1	100	100	0	NA	NM_178435	Q5T5B0	NM_178435	Hs.490208	bladder| pharynx| bladder carcinoma| head and neck tumor| adult	NM_178435	GO:0018149	peptide cross-linking	not recorded	NM_178435	GO:0001533	cornified envelope	not recorded	NM_178435	GO:0005198	structural molecule activity	not recorded	NA	NA	NA	ENST00000368789	Pfam	IPR028205	Late cornified envelope protein	3.43099	2.34672
TC0100015918.hg.1	4.82963	5.52281	-1.61685	down	UBE2Q1	ubiquitin-conjugating enzyme E2Q family member 1	coding	chr1	-	NM_017582	154548575	154559028	10	1q21.3	55585	NM_017582	RefSeq	Homo sapiens ubiquitin-conjugating enzyme E2Q family member 1 (UBE2Q1), mRNA.	chr1	100	100	0	NA	NM_017582	Q7Z7E8	NM_017582	Hs.607928	adrenal gland| ascites| bladder| blood| bone| bone marrow| brain| cervix| connective tissue| ear| embryonic tissue| eye| heart| intestine| kidney| liver| lung| lymph| lymph node| mammary gland| mouth| muscle| nerve| ovary| pancreas| pharynx| pituitary gland| placenta| prostate| skin| spleen| stomach| testis| thyroid| tonsil| uterus| vascular| bladder carcinoma| breast (mammary gland) tumor| cervi…	NM_017582	GO:0001967	suckling behavior	inferred from electronic annotation	NM_017582	GO:0005634	nucleus	inferred from electronic annotation	NM_017582	GO:0005515	protein binding	inferred from physical interaction	NA	NA	NA	ENST00000292211	Pfam	IPR000608	Ubiquitin-conjugating enzyme E2	4.82963	5.52281
TC0100015953.hg.1	5.15047	4.55659	1.5093	up	PKLR	pyruvate kinase, liver and RBC	coding	chr1	-	NM_000298	155289293	155301434	10	1q21	5313	NM_000298	RefSeq	Homo sapiens pyruvate kinase, liver and RBC (PKLR), transcript variant 1, mRNA.	chr1	100	100	0	NA	NM_000298	P30613	NM_000298	Hs.95990	kidney| liver| lung| skin| normal| fetus| adult	NM_000298	GO:0001666	response to hypoxia	inferred from electronic annotation	NM_000298	GO:0005829	cytosol	traceable author statement	NM_000298	GO:0000287	magnesium ion binding	inferred from electronic annotation	NM_000298	GenMAPP	Glycolysis_and_Gluconeogenesis	ENST00000342741	Pfam	IPR015793	Pyruvate kinase, barrel	5.15047	4.55659
TC0100016018.hg.1	2.16204	2.82144	-1.57943	down	CRABP2	cellular retinoic acid binding protein 2	coding	chr1	-	NM_001199723	156699606	156705816	10	1q21.3	1382	NM_001199723	RefSeq	Homo sapiens cellular retinoic acid binding protein 2 (CRABP2), transcript variant 2, mRNA.	chr1	100	100	0	NA	NM_001199723	P29373	NM_001199723	Hs.405662	blood| bone| brain| cervix| connective tissue| embryonic tissue| eye| heart| intestine| kidney| larynx| liver| lung| lymph node| mammary gland| mouth| muscle| ovary| pancreas| parathyroid| pharynx| placenta| prostate| skin| stomach| testis| thyroid| uterus| vascular| breast (mammary gland) tumor| chondrosarcoma| colorectal tumor| gastrointestinal tumor| germ cell tumor| glioma| head and neck tumo…	NM_001199723	GO:0006355	regulation of transcription, DNA-templated	traceable author statement	NM_001199723	GO:0005654	nucleoplasm	inferred from direct assay	NM_001199723	GO:0001972	retinoic acid binding	inferred from electronic annotation	NA	NA	NA	ENST00000368220	Pfam	IPR000566	Lipocalin/cytosolic fatty-acid binding domain	2.16204	2.82144
TC0100016163.hg.1	3.11319	4.07661	-1.94993	down	ADAMTS4	ADAM metallopeptidase with thrombospondin type 1 motif 4	coding	chr1	-	NM_005099	161184308	161199056	10	1q21-q23	9507	NM_005099	RefSeq	Homo sapiens ADAM metallopeptidase with thrombospondin type 1 motif, 4 (ADAMTS4), mRNA.	chr1	100	100	0	NA	NM_005099	O75173	NM_005099	Hs.211604	adipose tissue| brain| embryonic tissue| larynx| lung| mammary gland| muscle| pancreas| placenta| stomach| testis| trachea| uterus| breast (mammary gland) tumor| gastrointestinal tumor| head and neck tumor| normal| pancreatic tumor| blastocyst| juvenile| adult	NM_005099	GO:0001501	skeletal system development	traceable author statement	NM_005099	GO:0005576	extracellular region	traceable author statement	NM_005099	GO:0002020	protease binding	inferred from physical interaction	NA	NA	NA	ENST00000367995	Pfam	IPR002870	Peptidase M12B, propeptide	3.11319	4.07661
TC0100016260.hg.1	4.6689	5.48014	-1.75473	down	ALDH9A1	aldehyde dehydrogenase 9 family, member A1	coding	chr1	-	NM_000696	165662212	165698863	10	1q23.1	223	NM_000696	RefSeq	Homo sapiens aldehyde dehydrogenase 9 family, member A1 (ALDH9A1), mRNA.	chr1	100	100	0	NA	NM_000696	P49189	NM_000696	Hs.2533	adipose tissue| adrenal gland| ascites| bladder| blood| bone| bone marrow| brain| cervix| connective tissue| ear| embryonic tissue| esophagus| eye| heart| intestine| kidney| liver| lung| lymph| lymph node| mammary gland| mouth| muscle| nerve| ovary| pancreas| parathyroid| pharynx| pituitary gland| placenta| prostate| salivary gland| skin| spleen| stomach| testis| thymus| thyroid| trachea| umbilic…	NM_000696	GO:0006081	cellular aldehyde metabolic process	inferred from direct assay	NM_000696	GO:0005737	cytoplasm	traceable author statement	NM_000696	GO:0004028	3-chloroallyl aldehyde dehydrogenase activity	traceable author statement	NM_000696	HumanCyc	NPGLUCAT-PWY	ENST00000354775	Pfam	IPR015590	Aldehyde dehydrogenase domain	4.6689	5.48014
TC0100016447.hg.1	4.01717	4.86124	-1.79511	down	RC3H1	ring finger and CCCH-type domains 1	coding	chr1	-	NM_001300850	173931084	174022297	10	1q25.1	149041	NM_001300850	RefSeq	Homo sapiens ring finger and CCCH-type domains 1 (RC3H1), transcript variant 1, mRNA.	chr1	100	100	0	NA	NM_001300850	Q5TC82	NM_001300850	Hs.30258	adrenal gland| blood| bone marrow| brain| embryonic tissue| eye| intestine| kidney| larynx| liver| lung| lymph node| mammary gland| mouth| muscle| ovary| pancreas| placenta| prostate| skin| spleen| stomach| testis| thymus| thyroid| trachea| uterus| vascular|adrenal tumor| breast (mammary gland) tumor| colorectal tumor| gastrointestinal tumor| germ cell tumor| head and neck tumor| leukemia| liver …	NA	NA	NA	NA	NM_001300850	GO:0000932	cytoplasmic mRNA processing body	inferred from sequence or structural similarity	NM_001300850	GO:0003730	mRNA 3'-UTR binding	inferred from sequence or structural similarity	NA	NA	NA	ENST00000258349	Pfam	IPR000571	Zinc finger, CCCH-type	4.01717	4.86124
TC0100016476.hg.1	4.05666	4.76146	-1.62992	down	KIAA0040	KIAA0040	coding	chr1	-	NM_001162893	175156987	175193093	10	1q25.1	9674	NM_001162893	RefSeq	Homo sapiens KIAA0040 (KIAA0040), transcript variant 1, mRNA.	chr1	100	100	0	NA	NM_001162893	Q15053	NM_001162893	Hs.518138	bladder| blood| bone marrow| brain| connective tissue| embryonic tissue| esophagus| eye| heart| intestine| kidney| larynx| liver| lung| lymph node| mammary gland| mouth| muscle| nerve| ovary| pancreas| pharynx| placenta| prostate| skin| spleen| testis| thymus| tonsil| trachea| umbilical cord| uterus| vascular| breast (mammary gland) tumor| chondrosarcoma| colorectal tumor| esophageal tumor| germ …	NA	NA	NA	NA	NM_001162893	GO:0016020	membrane	inferred from electronic annotation	NM_001162893	GO:0005515	protein binding	inferred from physical interaction	NA	NA	NA	NA	NA	NA	NA	4.05666	4.76146
TC0100016618.hg.1	1.9242	3.01773	-2.13395	down	ZNF648	zinc finger protein 648	coding	chr1	-	NM_001009992	182054570	182061712	10	1q25.3	127665	NM_001009992	RefSeq	Homo sapiens zinc finger protein 648 (ZNF648), mRNA.	chr1	100	100	0	NA	NM_001009992	Q5T619	NM_001009992	Hs.684328	skin| trachea| skin tumor	NM_001009992	GO:0006351	transcription, DNA-templated	inferred from electronic annotation	NM_001009992	GO:0005634	nucleus	inferred from electronic annotation	NM_001009992	GO:0003677	DNA binding	inferred from electronic annotation	NA	NA	NA	OTTHUMT00000090794	Pfam	IPR007087	Zinc finger, C2H2	1.9242	3.01773
TC0100016685.hg.1	3.63272	4.3566	-1.65161	down	TRMT1L	tRNA methyltransferase 1 like	coding	chr1	-	NM_001202423	185118086	185157098	10	1q25.2	81627	NM_001202423	RefSeq	Homo sapiens tRNA methyltransferase 1-like (TRMT1L), transcript variant 2, mRNA.	chr1	100	100	0	NA	NM_001202423	Q7Z2T5	NM_001202423	Hs.107149	adipose tissue| adrenal gland| bladder| blood| bone| bone marrow| brain| connective tissue| embryonic tissue| eye| intestine| kidney| liver| lung| lymph node| mammary gland| mouth| muscle| ovary| parathyroid| placenta| prostate| skin| spleen| stomach| testis| thymus| thyroid| trachea| uterus| vascular|adrenal tumor| bladder carcinoma| breast (mammary gland) tumor| chondrosarcoma| colorectal tumor…	NM_001202423	GO:0002940	tRNA N2-guanine methylation	not recorded	NM_001202423	GO:0005634	nucleus	not recorded	NM_001202423	GO:0000049	tRNA binding	inferred from electronic annotation	NA	NA	NA	ENST00000367506	Pfam	IPR002905	tRNA methyltransferase, Trm1	3.63272	4.3566
TC0100016694.hg.1	3.25868	4.10116	-1.79313	down	IVNS1ABP	influenza virus NS1A binding protein	coding	chr1	-	NM_006469	185296388	185317329	10	1q25.1-q31.1	10625	NM_006469	RefSeq	Homo sapiens influenza virus NS1A binding protein (IVNS1ABP), mRNA.	chr1	100	100	0	NA	NM_006469	Q9Y6Y0	NM_006469	Hs.497183	adipose tissue| adrenal gland| ascites| bladder| blood| bone| bone marrow| brain| cervix| connective tissue| ear| embryonic tissue| esophagus| eye| heart| intestine| kidney| larynx| liver| lung| lymph node| mammary gland| mouth| muscle| nerve| ovary| pancreas| parathyroid| pharynx| placenta| prostate| skin| spleen| stomach| testis| thymus| thyroid| tonsil| trachea| uterus| vascular| bladder carci…	NM_006469	GO:0006383	transcription from RNA polymerase III promoter	traceable author statement	NM_006469	GO:0005654	nucleoplasm	inferred from electronic annotation	ENST00000367497	GO:0005515	protein binding	inferred from electronic annotation	NA	NA	NA	ENST00000367497	Pfam	IPR000210	BTB/POZ domain	3.25868	4.10116
TC0100016709.hg.1	2.30963	2.90165	-1.50736	down	TPR	translocated promoter region, nuclear basket protein	coding	chr1	-	NM_003292	186311652	186375693	10	1q25	7175	NM_003292	RefSeq	Homo sapiens translocated promoter region, nuclear basket protein (TPR), mRNA.	chr1	100	100	0	NA	NM_003292	P12270	NM_003292	Hs.279640	adrenal gland| ascites| bladder| blood| bone| bone marrow| brain| connective tissue| ear| embryonic tissue| esophagus| eye| heart| intestine| kidney| larynx| liver| lung| lymph| lymph node| mammary gland| mouth| muscle| nerve| ovary| pancreas| parathyroid| pharynx| pituitary gland| placenta| prostate| skin| stomach| testis| thymus| thyroid| trachea| umbilical cord| uterus| vascular|adrenal tumor|…	NA	NA	NA	NA	NA	NA	NA	NA	NM_003292	GO:0003682	chromatin binding	inferred from direct assay	NA	NA	NA	ENST00000367478	Pfam	IPR012929	Nucleoprotein TPR/MLP1	2.30963	2.90165
TC0100016786.hg.1	6.39954	7.05008	-1.56975	down	UCHL5	ubiquitin C-terminal hydrolase L5	coding	chr1	-	NM_001199261	193012250	193060107	10	1q32	51377	NM_001199261	RefSeq	Homo sapiens ubiquitin carboxyl-terminal hydrolase L5 (UCHL5), transcript variant 2, mRNA.	chr1	100	100	0	NA	NM_001199261	Q9Y5K5	NM_001199261	Hs.145469	adrenal gland| ascites| bladder| blood| bone| bone marrow| brain| cervix| connective tissue| embryonic tissue| esophagus| eye| heart| intestine| kidney| liver| lung| lymph| lymph node| mammary gland| mouth| muscle| ovary| pancreas| pharynx| placenta| prostate| salivary gland| skin| spleen| stomach| testis| uterus| vascular| bladder carcinoma| breast (mammary gland) tumor| cervical tumor| chondros…	NA	NA	NA	NA	NM_001199261	GO:0000502	proteasome complex	inferred from electronic annotation	NA	NA	NA	NA	NA	NA	NA	ENST00000367448	Pfam	IPR001578	Peptidase C12, ubiquitin carboxyl-terminal hydrolase	6.39954	7.05008
TC0100016831.hg.1	4.02117	5.40139	-2.60309	down	ASPM	abnormal spindle microtubule assembly	coding	chr1	-	NM_001206846	197084127	197146694	10	1q31	259266	NM_001206846	RefSeq	Homo sapiens abnormal spindle microtubule assembly (ASPM), transcript variant 2, mRNA.	chr1	100	100	0	NA	NM_001206846	Q8IZT6	NM_001206846	Hs.121028	adrenal gland| blood| bone| bone marrow| brain| connective tissue| embryonic tissue| esophagus| eye| heart| intestine| kidney| liver| lung| lymph| lymph node| mammary gland| mouth| muscle| placenta| prostate| skin| spleen| testis| thymus| umbilical cord| uterus| vascular|adrenal tumor| breast (mammary gland) tumor| chondrosarcoma| colorectal tumor| esophageal tumor| gastrointestinal tumor| germ c…	NM_001206846	GO:0001764	neuron migration	inferred from electronic annotation	NM_001206846	GO:0005634	nucleus	inferred from direct assay	NM_001206846	GO:0005516	calmodulin binding	inferred from electronic annotation	NA	NA	NA	ENST00000294732	Pfam	IPR000048	IQ motif, EF-hand binding site	4.02117	5.40139
TC0100016930.hg.1	2.48079	3.10175	-1.5379	down	LMOD1	leiomodin 1 (smooth muscle)	coding	chr1	-	NM_012134	201896452	201946588	10	1q32	25802	NM_012134	RefSeq	Homo sapiens leiomodin 1 (smooth muscle) (LMOD1), mRNA.	chr1	100	100	0	NA	NM_012134	P29536	NM_012134	Hs.519075	adrenal gland| blood| bone| brain| cervix| connective tissue| embryonic tissue| eye| heart| intestine| kidney| lung| mammary gland| mouth| muscle| nerve| ovary| pancreas| parathyroid| pharynx| placenta| prostate| skin| stomach| testis| thyroid| trachea| umbilical cord| uterus| vascular| breast (mammary gland) tumor| cervical tumor| chondrosarcoma| colorectal tumor| gastrointestinal tumor| germ ce…	NM_012134	GO:0006936	muscle contraction	not recorded	NM_012134	GO:0005737	cytoplasm	inferred from direct assay	NM_012134	GO:0003779	actin binding	inferred from electronic annotation	NA	NA	NA	ENST00000367288	Pfam	IPR003124	WH2 domain	2.48079	3.10175
TC0100017020.hg.1	3.03752	2.12799	1.87843	up	REN	renin	coding	chr1	-	NM_000537	204154816	204172576	10	1q32	5972	NM_000537	RefSeq	Homo sapiens renin (REN), mRNA.	chr1	100	100	0	NA	NM_000537	P00797	NM_000537	Hs.3210	bladder| embryonic tissue| intestine| kidney| lung| ovary| pancreas| placenta| skin| testis| bladder carcinoma| normal| ovarian tumor|embryoid body| fetus| adult	NM_000537	GO:0001822	kidney development	inferred from mutant phenotype	NM_000537	GO:0005576	extracellular region	traceable author statement	NM_000537	GO:0004190	aspartic-type endopeptidase activity	not recorded	NM_000537	GenMAPP	ACE-Inhibitor_pathway_PharmGKB	ENST00000272190	Pfam	IPR001461	Aspartic peptidase	3.03752	2.12799
TC0100017028.hg.1	1.83975	3.05778	-2.32628	down	PPP1R15B	protein phosphatase 1, regulatory subunit 15B	coding	chr1	-	NM_032833	204403364	204411817	10	1q32.1	84919	NM_032833	RefSeq	Homo sapiens protein phosphatase 1, regulatory subunit 15B (PPP1R15B), mRNA.	chr1	100	100	0	NA	NM_032833	Q5SWA1	NM_032833	Hs.304376	adipose tissue| adrenal gland| ascites| bladder| blood| bone| bone marrow| brain| cervix| connective tissue| ear| embryonic tissue| esophagus| eye| intestine| kidney| liver| lung| lymph| lymph node| mammary gland| mouth| muscle| nerve| ovary| pancreas| parathyroid| placenta| prostate| skin| spleen| stomach| testis| thymus| thyroid| trachea| uterus| vascular|adrenal tumor| bladder carcinoma| breas…	NM_032833	GO:0006417	regulation of translation	inferred from electronic annotation	NM_032833	GO:0000164	protein phosphatase type 1 complex	inferred from sequence or structural similarity	NM_032833	GO:0004722	protein serine/threonine phosphatase activity	inferred from electronic annotation	NA	NA	NA	ENST00000367188	Pfam	IPR019512	Protein phosphatase 1, regulatory subunit 15B, N-terminal	1.83975	3.05778
TC0100017029.hg.1	4.05798	3.3863	1.59293	up	PIK3C2B	phosphatidylinositol-4-phosphate 3-kinase, catalytic subunit type 2 beta	coding	chr1	-	NM_002646	204422628	204494724	10	1q32	5287	NM_002646	RefSeq	Homo sapiens phosphatidylinositol-4-phosphate 3-kinase, catalytic subunit type 2 beta (PIK3C2B), mRNA.	chr1	100	100	0	NA	NM_002646	O00750	NM_002646	Hs.497487	bladder| bone| bone marrow| brain| cervix| connective tissue| embryonic tissue| eye| heart| intestine| kidney| liver| lung| lymph node| mammary gland| mouth| muscle| ovary| pancreas| pharynx| placenta| prostate| stomach| testis| thymus| breast (mammary gland) tumor| cervical tumor| chondrosarcoma| colorectal tumor| germ cell tumor| glioma| head and neck tumor| kidney tumor| liver tumor| lung tumo…	NM_002646	GO:0006644	phospholipid metabolic process	traceable author statement	NM_002646	GO:0005634	nucleus	inferred from electronic annotation	NM_002646	GO:0001727	lipid kinase activity	inferred from electronic annotation	NM_002646	GenMAPP	S1P_Signaling	ENST00000367187	Pfam	IPR000008	C2 domain	4.05798	3.3863
TC0100017043.hg.1	3.38948	2.50912	1.84084	up	LRRN2	leucine rich repeat neuronal 2	coding	chr1	-	NM_006338	204617170	204685733	10	1q32.1	10446	NM_006338	RefSeq	Homo sapiens leucine rich repeat neuronal 2 (LRRN2), transcript variant 1, mRNA.	chr1	100	100	0	NA	NM_006338	O75325	NM_006338	Hs.26312	brain| embryonic tissue| eye| intestine| kidney| lung| mammary gland| ovary| pituitary gland| prostate| testis| thyroid| uterus| breast (mammary gland) tumor| germ cell tumor| glioma| head and neck tumor| kidney tumor| normal| ovarian tumor| primitive neuroectodermal tumor of the CNS| prostate cancer| retinoblastoma| uterine tumor|embryoid body| fetus| infant| adult	NM_006338	GO:0007155	cell adhesion	traceable author statement	NM_006338	GO:0016021	integral component of membrane	inferred from electronic annotation	NM_006338	GO:0004872	receptor activity	traceable author statement	NA	NA	NA	ENST00000367175	Pfam	IPR001611	Leucine-rich repeat	3.38948	2.50912
TC0100017059.hg.1	3.07627	3.91717	-1.79117	down	RBBP5	retinoblastoma binding protein 5	coding	chr1	-	NM_001193272	205086142	205122022	10	1q32	5929	NM_001193272	RefSeq	Homo sapiens retinoblastoma binding protein 5 (RBBP5), transcript variant 2, mRNA.	chr1	100	100	0	NA	NM_001193272	Q15291	NM_001193272	Hs.519230	blood| bone| bone marrow| brain| cervix| connective tissue| embryonic tissue| eye| intestine| kidney| liver| lung| lymph| lymph node| mammary gland| mouth| muscle| pancreas| pharynx| placenta| prostate| skin| stomach| testis| thymus| thyroid| trachea| umbilical cord| uterus| vascular| breast (mammary gland) tumor| cervical tumor| chondrosarcoma| colorectal tumor| gastrointestinal tumor| germ cell…	NM_001193272	GO:0006325	chromatin organization	traceable author statement	NM_001193272	GO:0005634	nucleus	inferred from direct assay	NM_001193272	GO:0005515	protein binding	inferred from physical interaction	NA	NA	NA	ENST00000264515	Pfam	IPR001680	WD40 repeat	3.07627	3.91717
TC0100017094.hg.1	2.11082	3.12634	-2.02163	down	FAM72A	family with sequence similarity 72, member A	coding	chr1	-	NM_001123168	206186179	206204414	10	1q32.1	729533	NM_001123168	RefSeq	Homo sapiens family with sequence similarity 72, member A (FAM72A), mRNA.	chr1	100	100	0	NA	NM_001123168	Q5TYM5	NM_001123168	Hs.661924	ascites| bone marrow| brain| connective tissue| embryonic tissue| eye| lung| lymph node| mammary gland| muscle| pancreas| pharynx| placenta| prostate| salivary gland| skin| stomach| thymus| breast (mammary gland) tumor| gastrointestinal tumor| germ cell tumor| glioma| head and neck tumor| leukemia| lung tumor| normal| pancreatic tumor| prostate cancer| retinoblastoma| skin tumor| soft tissue/musc…	NA	NA	NA	NA	NM_001123168	GO:0005737	cytoplasm	inferred from direct assay	NM_001123168	GO:0005515	protein binding	inferred from physical interaction	NA	NA	NA	ENST00000341209	Pfam	IPR026768	Protein FAM72	2.11082	3.12634
TC0100017113.hg.1	1.83934	2.6145	-1.71138	down	PIGR	polymeric immunoglobulin receptor	coding	chr1	-	NM_002644	206928518	206946466	10	1q31-q41	5284	NM_002644	RefSeq	Homo sapiens polymeric immunoglobulin receptor (PIGR), mRNA.	chr1	100	100	0	NA	NM_002644	P01833	NM_002644	Hs.497589	brain| connective tissue| eye| heart| intestine| kidney| larynx| liver| lung| mammary gland| muscle| pharynx| prostate| skin| stomach| trachea| uterus| breast (mammary gland) tumor| chondrosarcoma| colorectal tumor| gastrointestinal tumor| head and neck tumor| lung tumor| non-neoplasia| normal| uterine tumor| fetus| adult	NM_002644	GO:0001580	detection of chemical stimulus involved in sensory perception of bitter taste	inferred from direct assay	NM_002644	GO:0005615	extracellular space	inferred from direct assay	NM_002644	GO:0001792	polymeric immunoglobulin receptor activity	inferred from direct assay	NA	NA	NA	ENST00000356495	Pfam	IPR013106	Immunoglobulin V-set domain	1.83934	2.6145
TC0100017142.hg.1	5.50302	4.77744	1.65357	up	CD34	CD34 molecule	coding	chr1	-	NM_001025109	207880972	207911402	10	1q32	947	NM_001025109	RefSeq	Homo sapiens CD34 molecule (CD34), transcript variant 1, mRNA.	chr1	100	100	0	NA	NM_001025109	P28906	NM_001025109	Hs.374990	adipose tissue| adrenal gland| bladder| blood| bone| bone marrow| brain| cervix| connective tissue| ear| esophagus| eye| heart| intestine| kidney| liver| lung| mammary gland| mouth| muscle| ovary| pancreas| placenta| prostate| skin| spleen| stomach| testis| thymus| thyroid| trachea| umbilical cord| uterus| vascular| bladder carcinoma| breast (mammary gland) tumor| chondrosarcoma| colorectal tumor…	NA	NA	NA	NA	NM_001025109	GO:0005737	cytoplasm	inferred from direct assay	NM_001025109	GO:0008134	transcription factor binding	inferred from physical interaction	NA	NA	NA	ENST00000310833	Pfam	IPR013836	CD34/Podocalyxin	5.50302	4.77744
TC0100017212.hg.1	4.95736	4.2544	1.62784	up	SLC30A1	solute carrier family 30 (zinc transporter), member 1	coding	chr1	-	NM_021194	211571568	211578757	10	1q32.3	7779	NM_021194	RefSeq	Homo sapiens solute carrier family 30 (zinc transporter), member 1 (SLC30A1), mRNA.	chr1	100	100	0	NA	NM_021194	Q9Y6M5	NM_021194	Hs.519469	adrenal gland| bladder| blood| bone| brain| cervix| connective tissue| embryonic tissue| esophagus| eye| heart| intestine| kidney| larynx| liver| lung| lymph| mammary gland| muscle| nerve| ovary| pancreas| parathyroid| placenta| prostate| skin| stomach| testis| thymus| thyroid| uterus| vascular| breast (mammary gland) tumor| cervical tumor| chondrosarcoma| colorectal tumor| esophageal tumor| gast…	NM_021194	GO:0001701	in utero embryonic development	inferred from electronic annotation	NM_021194	GO:0005737	cytoplasm	inferred from direct assay	NM_021194	GO:0005385	zinc ion transmembrane transporter activity	not recorded	NA	NA	NA	ENST00000367001	Pfam	IPR002524	Cation efflux protein	4.95736	4.2544
TC0100017216.hg.1	4.03602	4.64396	-1.52408	down	NEK2	NIMA-related kinase 2	coding	chr1	-	NM_001204182	211658257	211675630	10	1q32.3	4751	NM_001204182	RefSeq	Homo sapiens NIMA-related kinase 2 (NEK2), transcript variant 3, mRNA.	chr1	100	100	0	NA	NM_001204182	P51955	NM_001204182	Hs.153704	ascites| bladder| blood| bone| bone marrow| brain| cervix| connective tissue| embryonic tissue| intestine| kidney| larynx| liver| lung| lymph node| mammary gland| ovary| pancreas| placenta| prostate| salivary gland| skin| stomach| testis| thymus| uterus| vascular| bladder carcinoma| breast (mammary gland) tumor| cervical tumor| chondrosarcoma| colorectal tumor| gastrointestinal tumor| germ cell t…	NA	NA	NA	NA	NM_001204182	GO:0000776	kinetochore	inferred from direct assay	NM_001204182	GO:0004672	protein kinase activity	inferred from direct assay	NA	NA	NA	ENST00000366998	Pfam	IPR000719	Protein kinase domain	4.03602	4.64396
TC0100017229.hg.1	1.95695	2.57694	-1.53687	down	INTS7	integrator complex subunit 7	coding	chr1	-	NM_001199809	211940399	212035660	10	1q32.3	25896	NM_001199809	RefSeq	Homo sapiens integrator complex subunit 7 (INTS7), transcript variant 4, mRNA.	chr1	100	100	0	NA	NM_001199809	Q9NVH2	NM_001199809	Hs.369285	adipose tissue| adrenal gland| ascites| bladder| blood| bone marrow| brain| cervix| connective tissue| embryonic tissue| esophagus| eye| heart| intestine| kidney| larynx| liver| lung| lymph node| mammary gland| mouth| muscle| pancreas| pituitary gland| placenta| prostate| skin| spleen| stomach| testis| thymus| thyroid| trachea| uterus| vascular| bladder carcinoma| breast (mammary gland) tumor| ce…	NM_001199809	GO:0000077	DNA damage checkpoint	inferred from mutant phenotype	NM_001199809	GO:0005694	chromosome	inferred from direct assay	NM_001199809	GO:0005515	protein binding	inferred from physical interaction	NA	NA	NA	NA	NA	NA	NA	1.95695	2.57694
TC0100017267.hg.1	2.42053	3.89857	-2.78572	down	ANGEL2	angel homolog 2 (Drosophila)	coding	chr1	-	NM_001300753	212992182	213015875	10	1q32.3	90806	NM_001300753	RefSeq	Homo sapiens angel homolog 2 (Drosophila) (ANGEL2), transcript variant 2, mRNA.	chr1	100	100	0	NA	NM_001300753	Q5VTE6	NM_001300753	Hs.157078	brain| cervix| connective tissue| embryonic tissue| esophagus| eye| heart| intestine| kidney| liver| lung| lymph node| mammary gland| mouth| muscle| ovary| pancreas| placenta| prostate| skin| testis| thymus| thyroid| trachea| uterus| vascular| breast (mammary gland) tumor| cervical tumor| chondrosarcoma| colorectal tumor| esophageal tumor| gastrointestinal tumor| germ cell tumor| glioma| head and…	NM_001300753	GO:0045930	negative regulation of mitotic cell cycle	inferred from mutant phenotype	NM_001300753	GO:0005737	cytoplasm	inferred from direct assay	NM_001300753	GO:0003730	mRNA 3'-UTR binding	inferred from direct assay	NA	NA	NA	ENST00000360506	Pfam	IPR005135	Endonuclease/exonuclease/phosphatase	2.42053	3.89857
TC0100017491.hg.1	4.45417	6.12386	-3.18146	down	ENAH	enabled homolog (Drosophila)	coding	chr1	-	NM_001008493	225486832	225653143	10	1q42.12	55740	NM_001008493	RefSeq	Homo sapiens enabled homolog (Drosophila) (ENAH), transcript variant 1, mRNA.	chr1	100	100	0	NA	NM_001008493	Q8N8S7	NM_001008493	Hs.497893	adipose tissue| adrenal gland| ascites| bladder| bone| bone marrow| brain| cervix| connective tissue| ear| embryonic tissue| esophagus| eye| heart| intestine| kidney| larynx| liver| lung| mammary gland| mouth| muscle| nerve| ovary| pancreas| parathyroid| pharynx| pituitary gland| placenta| prostate| salivary gland| skin| spleen| stomach| testis| thymus| thyroid| trachea| umbilical cord| uterus| v…	NM_001008493	GO:0001843	neural tube closure	inferred from electronic annotation	NM_001008493	GO:0001725	stress fiber	inferred from electronic annotation	NM_001008493	GO:0003779	actin binding	inferred from electronic annotation	NA	NA	NA	ENST00000284563	Pfam	IPR000697	WH1/EVH1 domain	4.45417	6.12386
TC0100017528.hg.1	3.84263	4.79721	-1.93802	down	PARP1	poly(ADP-ribose) polymerase 1	coding	chr1	-	NM_001618	226360691	226408100	10	1q41-q42	142	NM_001618	RefSeq	Homo sapiens poly (ADP-ribose) polymerase 1 (PARP1), mRNA.	chr1	100	100	0	NA	NM_001618	P09874	NM_001618	Hs.177766	adipose tissue| adrenal gland| ascites| bladder| blood| bone| bone marrow| brain| cervix| connective tissue| ear| embryonic tissue| esophagus| eye| heart| intestine| kidney| larynx| liver| lung| lymph| lymph node| mammary gland| mouth| muscle| nerve| ovary| pancreas| parathyroid| pharynx| pituitary gland| placenta| prostate| skin| spleen| stomach| testis| thymus| thyroid| tonsil| trachea| uterus|…	NA	NA	NA	NA	NM_001618	GO:0000784	nuclear chromosome, telomeric region	inferred from direct assay	NA	NA	NA	NA	NM_001618	GenMAPP	Apoptosis_GenMAPP	ENST00000366790	Pfam	IPR001510	Zinc finger, PARP-type	3.84263	4.79721
TC0100017664.hg.1	1.51841	2.30176	-1.72112	down	NUP133	nucleoporin 133kDa	coding	chr1	-	NM_018230	229440260	229508341	10	1q42.13	55746	NM_018230	RefSeq	Homo sapiens nucleoporin 133kDa (NUP133), mRNA.	chr1	100	100	0	NA	NM_018230	Q8WUM0	NM_018230	Hs.12457	adrenal gland| ascites| bladder| blood| bone| bone marrow| brain| cervix| connective tissue| ear| embryonic tissue| esophagus| eye| heart| intestine| kidney| larynx| liver| lung| lymph node| mammary gland| mouth| muscle| nerve| pancreas| parathyroid| pharynx| pituitary gland| placenta| prostate| salivary gland| skin| stomach| testis| thymus| thyroid| trachea| uterus| vascular|adrenal tumor| breas…	NA	NA	NA	NA	NM_018230	GO:0000777	condensed chromosome kinetochore	inferred from direct assay	NM_018230	GO:0005487	nucleocytoplasmic transporter activity	inferred from direct assay	NA	NA	NA	ENST00000261396	Pfam	IPR007187	Nucleoporin, Nup133/Nup155-like, C-terminal	1.51841	2.30176
TC0100017844.hg.1	3.85407	2.46019	2.62784	up	NID1	nidogen 1	coding	chr1	-	NM_002508	235975830	236065181	10	1q43	4811	NM_002508	RefSeq	Homo sapiens nidogen 1 (NID1), mRNA.	chr1	100	100	0	NA	NM_002508	P14543	NM_002508	Hs.356624	adipose tissue| adrenal gland| bladder| blood| bone| bone marrow| brain| cervix| connective tissue| ear| embryonic tissue| esophagus| eye| heart| intestine| kidney| larynx| liver| lung| lymph node| mammary gland| muscle| nerve| pancreas| parathyroid| pharynx| placenta| prostate| skin| spleen| stomach| testis| thymus| thyroid| uterus| vascular| bladder carcinoma| breast (mammary gland) tumor| chon…	NM_002508	GO:0007160	cell-matrix adhesion	inferred from electronic annotation	NM_002508	GO:0005576	extracellular region	traceable author statement	NM_002508	GO:0005509	calcium ion binding	inferred from electronic annotation	NA	NA	NA	ENST00000264187	Pfam	IPR000033	LDLR class B repeat	3.85407	2.46019
TC0100017860.hg.1	5.03651	5.9167	-1.84062	down	HEATR1	HEAT repeat containing 1	coding	chr1	-	NM_018072	236540094	236604541	10	1q43	55127	NM_018072	RefSeq	Homo sapiens HEAT repeat containing 1 (HEATR1), mRNA.	chr1	100	100	0	NA	NM_018072	Q9H583	NM_018072	Hs.708114	adipose tissue| adrenal gland| ascites| bladder| blood| bone| bone marrow| brain| cervix| connective tissue| ear| embryonic tissue| eye| heart| intestine| kidney| larynx| liver| lung| lymph| lymph node| mammary gland| mouth| muscle| nerve| ovary| pancreas| parathyroid| pharynx| placenta| prostate| skin| spleen| stomach| testis| thymus| thyroid| trachea| umbilical cord| uterus| vascular|adrenal tu…	NM_018072	GO:0000462	maturation of SSU-rRNA from tricistronic rRNA transcript (SSU-rRNA, 5.8S rRNA, LSU-rRNA)	not recorded	NM_018072	GO:0005634	nucleus	inferred from direct assay	NM_018072	GO:0005515	protein binding	inferred from physical interaction	NA	NA	NA	ENST00000366581	Pfam	IPR012954	BP28, C-terminal domain	5.03651	5.9167
TC0100018080.hg.1	2.64554	3.67387	-2.03967	down	AHCTF1	AT hook containing transcription factor 1	coding	chr1	-	NM_015446	246839098	246931978	10	1q44	25909	NM_015446	RefSeq	Homo sapiens AT hook containing transcription factor 1 (AHCTF1), mRNA.	chr1	100	100	0	NA	NM_015446	Q8WYP5	NM_015446	Hs.300887	adrenal gland| bone| bone marrow| brain| connective tissue| embryonic tissue| esophagus| eye| heart| intestine| kidney| liver| lung| lymph| lymph node| mammary gland| mouth| muscle| ovary| pancreas| parathyroid| placenta| prostate| skin| stomach| testis| thymus| thyroid| trachea| uterus| vascular| bladder carcinoma| breast (mammary gland) tumor| chondrosarcoma| colorectal tumor| esophageal tumor|…	NM_015446	GO:0000278	mitotic cell cycle	traceable author statement	NM_015446	GO:0000777	condensed chromosome kinetochore	inferred from direct assay	NM_015446	GO:0003677	DNA binding	inferred from electronic annotation	NA	NA	NA	ENST00000326225	Pfam	IPR025151	ELYS-like domain	2.64554	3.67387
TC0100018131.hg.1	1.33395	2.01389	-1.60207	down	OR2T10	olfactory receptor, family 2, subfamily T, member 10	coding	chr1	-	NM_001004693	248592751	248593799	10	1q44	127069	NM_001004693	RefSeq	Homo sapiens olfactory receptor, family 2, subfamily T, member 10 (OR2T10), mRNA.	chr1	100	100	0	NA	NM_001004693	Q8NGZ9	NM_001004693	Hs.553585	NA	NM_001004693	GO:0007186	G-protein coupled receptor signaling pathway	not recorded	NM_001004693	GO:0005886	plasma membrane	traceable author statement	NM_001004693	GO:0004930	G-protein coupled receptor activity	inferred from electronic annotation	NA	NA	NA	OTTHUMT00000097139	Pfam	IPR000276	G protein-coupled receptor, rhodopsin-like	1.33395	2.01389
TC0100018224.hg.1	1.52719	2.18676	-1.57961	down	FAM183A	family with sequence similarity 183, member A	coding	chr1	+	NM_001101376	43147867	43156396	10	1p34.2	440585	NM_001101376	RefSeq	Homo sapiens family with sequence similarity 183, member A (FAM183A), mRNA.	chr1	100	100	0	NA	NM_001101376	A6NL82	NM_001101376	Hs.657614	brain| lung| pituitary gland| placenta| prostate| testis| uterus| normal| uterine tumor| fetus| adult	NA	NA	NA	NA	NA	NA	NA	NA	NA	NA	NA	NA	NA	NA	NA	ENST00000335282	Pfam	IPR029214	FAM183 family	1.52719	2.18676
TC0100018234.hg.1	1.44985	2.04885	-1.51466	down	TNNI3K	TNNI3 interacting kinase	coding	chr1	+	NM_015978	74235387	74544432	10	1p31.1	51086	NM_015978	RefSeq	Homo sapiens TNNI3 interacting kinase (TNNI3K), mRNA.	chr1	100	100	0	NA	NM_015978	O14772	NM_015978	Hs.480085	ascites| blood| bone| bone marrow| brain| connective tissue| embryonic tissue| esophagus| eye| heart| intestine| kidney| liver| lung| lymph node| mammary gland| mouth| muscle| nerve| ovary| pancreas| parathyroid| pharynx| pituitary gland| placenta| prostate| skin| stomach| testis| thymus| trachea| umbilical cord| uterus| vascular| breast (mammary gland) tumor| chondrosarcoma| esophageal tumor| ga…	NM_015978	GO:0002027	regulation of heart rate	inferred from genetic interaction	NM_015978	GO:0005634	nucleus	inferred from direct assay	NM_015978	GO:0004672	protein kinase activity	inferred from direct assay	NA	NA	NA	ENST00000326637	Pfam	IPR001245	Serine-threonine/tyrosine-protein kinase catalytic domain	1.44985	2.04885
TC0100018242.hg.1	3.44624	4.24818	-1.74344	down	HS2ST1	heparan sulfate 2-O-sulfotransferase 1	coding	chr1	+	NM_001134492	86914648	87109998	10	1p22.3	9653	NM_001134492	RefSeq	Homo sapiens heparan sulfate 2-O-sulfotransferase 1 (HS2ST1), transcript variant 2, mRNA.	chr1	100	100	0	NA	NM_001134492	Q7LGA3	NM_001134492	Hs.743280	adrenal gland| ascites| bladder| blood| bone| brain| connective tissue| ear| embryonic tissue| eye| heart| intestine| kidney| liver| lung| lymph node| mammary gland| mouth| muscle| ovary| pancreas| parathyroid| pituitary gland| placenta| prostate| salivary gland| skin| stomach| testis| thymus| thyroid| uterus| vascular|adrenal tumor| breast (mammary gland) tumor| chondrosarcoma| colorectal tumor|…	NM_001134492	GO:0005975	carbohydrate metabolic process	traceable author statement	NM_001134492	GO:0000139	Golgi membrane	traceable author statement	NM_001134492	GO:0004394	heparan sulfate 2-O-sulfotransferase activity	inferred from electronic annotation	NA	NA	NA	ENST00000370550	Pfam	IPR005331	Sulfotransferase	3.44624	4.24818
TC0100018284.hg.1	3.94612	4.71104	-1.69928	down	CHD1L	chromodomain helicase DNA binding protein 1-like	coding	chr1	+	NM_001256336	147242641	147295777	10	1q12	9557	NM_001256336	RefSeq	Homo sapiens chromodomain helicase DNA binding protein 1-like (CHD1L), transcript variant 2, mRNA.	chr1	100	100	0	NA	NM_001256336	Q86WJ1	NM_001256336	Hs.191164	adrenal gland| ascites| blood| bone| bone marrow| brain| cervix| connective tissue| embryonic tissue| eye| heart| intestine| kidney| larynx| liver| lung| lymph| lymph node| mammary gland| mouth| muscle| ovary| pancreas| parathyroid| pharynx| pituitary gland| placenta| prostate| salivary gland| skin| spleen| stomach| testis| thymus| thyroid| trachea| umbilical cord| uterus| vascular|adrenal tumor|…	NM_001256336	GO:0006281	DNA repair	traceable author statement	NM_001256336	GO:0005634	nucleus	inferred from direct assay	NM_001256336	GO:0000166	nucleotide binding	inferred from direct assay	NA	NA	NA	ENST00000361293	Pfam	IPR001650	Helicase, C-terminal	3.94612	4.71104
TC0100018315.hg.1	6.97098	7.6096	-1.55683	down	UCK2	uridine-cytidine kinase 2	coding	chr1	+	NM_012474	165827495	165911618	10	1q23	7371	NM_012474	RefSeq	Homo sapiens uridine-cytidine kinase 2 (UCK2), mRNA.	chr1	100	100	0	NA	NM_012474	Q9BZX2	NM_012474	Hs.458360	ascites| blood| bone| brain| cervix| connective tissue| embryonic tissue| esophagus| eye| heart| intestine| kidney| larynx| liver| lung| lymph| lymph node| mammary gland| mouth| muscle| ovary| pancreas| parathyroid| placenta| prostate| skin| stomach| testis| thymus| umbilical cord| uterus| bladder carcinoma| breast (mammary gland) tumor| cervical tumor| chondrosarcoma| colorectal tumor| esophagea…	NM_012474	GO:0006206	pyrimidine nucleobase metabolic process	traceable author statement	NM_012474	GO:0005829	cytosol	traceable author statement	NM_012474	GO:0004849	uridine kinase activity	not recorded	NM_012474	HumanCyc	P1-PWY	ENST00000367879	Pfam	IPR006083	Phosphoribulokinase/uridine kinase	6.97098	7.6096
TC0100018352.hg.1	3.50995	2.62281	1.8495	up	SNAP47	synaptosome associated protein 47kDa	coding	chr1	+	OTTHUMT00000091965	227728539	227734354	10	1q42.13	116841	OTTHUMT00000091965	Havana transcript	synaptosomal-associated protein, 47kDa[gene_biotype:protein_coding transcript_biotype:processed_transcript]	chr1	100	100	0	NA	OTTHUMT00000091965	Q5SQN1	OTTHUMT00000091965	Hs.325081	ascites| blood| bone| brain| cervix| connective tissue| embryonic tissue| eye| heart| intestine| kidney| liver| lung| lymph| lymph node| mammary gland| muscle| nerve| ovary| pancreas| pituitary gland| placenta| prostate| salivary gland| skin| spleen| stomach| testis| thymus| thyroid| tonsil| uterus| breast (mammary gland) tumor| cervical tumor| chondrosarcoma| colorectal tumor| gastrointestinal t…	OTTHUMT00000091965	GO:0006887	exocytosis	not recorded	OTTHUMT00000091965	GO:0005886	plasma membrane	not recorded	OTTHUMT00000091965	GO:0005484	SNAP receptor activity	not recorded	NA	NA	NA	NA	NA	NA	NA	3.50995	2.62281
TC0100018403.hg.1	6.01508	6.84402	-1.77638	down	ERRFI1	ERBB receptor feedback inhibitor 1	coding	chr1	-	NM_018948	8011719	8026333	10	1p36	54206	NM_018948	RefSeq	Homo sapiens ERBB receptor feedback inhibitor 1 (ERRFI1), mRNA.	chr1	100	100	0	NA	NM_018948	Q9UJM3	NM_018948	Hs.605445	adipose tissue| adrenal gland| ascites| blood| bone| brain| cervix| connective tissue| ear| embryonic tissue| esophagus| eye| heart| intestine| kidney| larynx| liver| lung| mammary gland| mouth| muscle| nerve| ovary| pancreas| parathyroid| pituitary gland| placenta| prostate| skin| stomach| testis| thymus| thyroid| trachea| uterus| breast (mammary gland) tumor| cervical tumor| chondrosarcoma| col…	NA	NA	NA	NA	NM_018948	GO:0005634	nucleus	inferred from electronic annotation	NM_018948	GO:0005096	GTPase activator activity	traceable author statement	NA	NA	NA	ENST00000377482	Pfam	IPR015116	Cdc42 binding domain-like	6.01508	6.84402
TC0100018424.hg.1	5.8463	6.90964	-2.08977	down	HNRNPR	heterogeneous nuclear ribonucleoprotein R	coding	chr1	-	NM_001102397	23303771	23344364	10	1p36.12	10236	NM_001102397	RefSeq	Homo sapiens heterogeneous nuclear ribonucleoprotein R (HNRNPR), transcript variant 4, mRNA.	chr1	100	100	0	NA	NM_001102397	O43390	NM_001102397	Hs.373763	adipose tissue| adrenal gland| ascites| bladder| blood| bone| bone marrow| brain| cervix| connective tissue| ear| embryonic tissue| esophagus| eye| heart| intestine| kidney| larynx| liver| lung| lymph| lymph node| mammary gland| mouth| muscle| ovary| pancreas| parathyroid| pharynx| pituitary gland| placenta| prostate| salivary gland| skin| spleen| stomach| testis| thymus| thyroid| trachea| umbili…	NM_001102397	GO:0000398	mRNA splicing, via spliceosome	inferred by curator	NA	NA	NA	NA	NM_001102397	GO:0000166	nucleotide binding	inferred from electronic annotation	NM_001102397	GenMAPP	mRNA_processing_Reactome	ENST00000302271	Pfam	IPR000504	RNA recognition motif domain	5.8463	6.90964
TC0100018433.hg.1	4.25999	4.9393	-1.60138	down	RRAGC	Ras-related GTP binding C	coding	chr1	-	NM_001271851	38838197	38859823	10	1p34	64121	NM_001271851	RefSeq	Homo sapiens Ras-related GTP binding C (RRAGC), transcript variant 2, mRNA.	chr1	100	100	0	NA	NM_001271851	Q9HB90	NM_001271851	Hs.532461	adipose tissue| bladder| blood| bone| bone marrow| brain| connective tissue| ear| embryonic tissue| eye| heart| intestine| kidney| liver| lung| lymph| lymph node| mammary gland| mouth| muscle| ovary| pancreas| parathyroid| pharynx| pituitary gland| placenta| prostate| skin| spleen| testis| thyroid| uterus| vascular| breast (mammary gland) tumor| chondrosarcoma| colorectal tumor| gastrointestinal …	NM_001271851	GO:0006351	transcription, DNA-templated	non-traceable author statement	NM_001271851	GO:0005634	nucleus	inferred from direct assay	NM_001271851	GO:0000287	magnesium ion binding	non-traceable author statement	NA	NA	NA	ENST00000373001	Pfam	IPR006762	Gtr1/RagA G protein	4.25999	4.9393
TC0100018435.hg.1	7.51094	8.14888	-1.5561	down	EBNA1BP2	EBNA1 binding protein 2	coding	chr1	-	NM_001159936	43164174	43172570	10	1p35-p33	10969	NM_001159936	RefSeq	Homo sapiens EBNA1 binding protein 2 (EBNA1BP2), transcript variant 1, mRNA.	chr1	100	100	0	NA	NM_001159936	Q99848	NM_001159936	Hs.346868	adipose tissue| adrenal gland| ascites| blood| bone| bone marrow| brain| cervix| connective tissue| embryonic tissue| esophagus| eye| heart| intestine| kidney| larynx| liver| lung| lymph| lymph node| mammary gland| mouth| muscle| ovary| pancreas| parathyroid| pituitary gland| placenta| prostate| salivary gland| skin| spleen| stomach| testis| thymus| thyroid| tonsil| trachea| umbilical cord| uteru…	NM_001159936	GO:0042254	ribosome biogenesis	inferred from electronic annotation	NM_001159936	GO:0005634	nucleus	inferred from direct assay	NM_001159936	GO:0044822	poly(A) RNA binding	inferred from direct assay	NA	NA	NA	ENST00000236051	Pfam	IPR008610	Eukaryotic rRNA processing	7.51094	8.14888
TC0100018452.hg.1	1.58048	2.2909	-1.63628	down	GBP7	guanylate binding protein 7	coding	chr1	-	NM_207398	89131751	89176040	10	1p22.2	388646	NM_207398	RefSeq	Homo sapiens guanylate binding protein 7 (GBP7), mRNA.	chr1	100	100	0	NA	NM_207398	Q8N8V2	NM_207398	Hs.591450	eye| liver| stomach| gastrointestinal tumor| liver tumor| normal| fetus| adult	NM_207398	GO:0008152	metabolic process	inferred from electronic annotation	NM_207398	GO:0016020	membrane	inferred from electronic annotation	NM_207398	GO:0003924	GTPase activity	inferred from electronic annotation	NA	NA	NA	ENST00000294671	Pfam	IPR003191	Guanylate-binding protein, C-terminal	1.58048	2.2909
TC0100018462.hg.1	4.14066	4.79228	-1.57093	down	CLCC1	chloride channel CLIC-like 1	coding	chr1	-	NM_001048210	108929508	108963499	10	1p13.3	23155	NM_001048210	RefSeq	Homo sapiens chloride channel CLIC-like 1 (CLCC1), transcript variant 1, mRNA.	chr1	100	100	0	NA	NM_001048210	Q96S66	NM_001048210	Hs.658489	adrenal gland| bladder| blood| bone marrow| brain| connective tissue| embryonic tissue| esophagus| eye| heart| intestine| kidney| liver| lung| lymph| lymph node| mammary gland| mouth| muscle| nerve| pancreas| pharynx| pituitary gland| placenta| prostate| skin| spleen| stomach| testis| thyroid| trachea| uterus| vascular|adrenal tumor| bladder carcinoma| breast (mammary gland) tumor| chondrosarcoma…	NM_001048210	GO:1902476	chloride transmembrane transport	inferred from electronic annotation	NM_001048210	GO:0005634	nucleus	inferred from electronic annotation	NM_001048210	GO:0005254	chloride channel activity	inferred from electronic annotation	NA	NA	NA	ENST00000302500	Pfam	IPR009231	Chloride channel CLIC-like	4.14066	4.79228
TC0100018479.hg.1	3.70595	4.39702	-1.61448	down	NOTCH2NL	notch 2 N-terminal like	coding	chr1	-	NM_203458	146146203	146229034	10	1q21.2	388677	NM_203458	RefSeq	Homo sapiens notch 2 N-terminal like (NOTCH2NL), mRNA.	chr1	100	100	0	NA	NM_203458	Q7Z3S9	NM_203458	Hs.655156	ear| embryonic tissue| eye| kidney| liver| lung| mammary gland| ovary| pancreas| placenta| prostate| skin| testis| thyroid| uterus| vascular| head and neck tumor| normal| ovarian tumor| pancreatic tumor| prostate cancer| skin tumor| uterine tumor| fetus| adult	NM_203458	GO:0007219	Notch signaling pathway	inferred from electronic annotation	NM_203458	GO:0005576	extracellular region	inferred from electronic annotation	NM_203458	GO:0005509	calcium ion binding	inferred from electronic annotation	NA	NA	NA	ENST00000362074	Pfam	IPR000742	EGF-like domain	3.70595	4.39702
TC0100018480.hg.1	3.87586	4.62505	-1.68084	down	NBPF14	neuroblastoma breakpoint family, member 14	coding	chr1	-	NM_015383	148531385	148596011	10	1q21.2	25832	NM_015383	RefSeq	Homo sapiens neuroblastoma breakpoint family, member 14 (NBPF14), mRNA.	chr1	100	100	0	NA	NM_015383	Q3BBV0	NM_015383	Hs.732082	adipose tissue| adrenal gland| blood| brain| cervix| eye| heart| intestine| kidney| liver| lung| lymph node| muscle| nerve| ovary| pancreas| pituitary gland| placenta| skin| stomach| testis| thyroid| uterus| vascular|adrenal tumor| cervical tumor| colorectal tumor| gastrointestinal tumor| germ cell tumor| glioma| head and neck tumor| liver tumor| non-neoplasia| normal| ovarian tumor| pancreatic t…	NA	NA	NA	NA	NM_015383	GO:0005737	cytoplasm	inferred from electronic annotation	NM_015383	GO:0044822	poly(A) RNA binding	inferred from direct assay	NA	NA	NA	OTTHUMT00000476570	Pfam	IPR010630	Neuroblastoma breakpoint family (NBPF) domain	3.87586	4.62505
TC0100018481.hg.1	2.46864	3.14124	-1.59393	down	NOTCH2NL	notch 2 N-terminal like	coding	chr1	-	BC090943	148606287	148679751	10	1q21.2	388677	BC090943	GenBank	Homo sapiens Notch homolog 2 (Drosophila) N-terminal like, mRNA (cDNA clone MGC:105043 IMAGE:5404327), complete cds.	chr1	100	100	0	NA	BC090943	Q7Z3S9	BC090943	Hs.655156	ear| embryonic tissue| eye| kidney| liver| lung| mammary gland| ovary| pancreas| placenta| prostate| skin| testis| thyroid| uterus| vascular| head and neck tumor| normal| ovarian tumor| pancreatic tumor| prostate cancer| skin tumor| uterine tumor| fetus| adult	BC090943	GO:0007219	Notch signaling pathway	inferred from electronic annotation	BC090943	GO:0005576	extracellular region	inferred from electronic annotation	BC090943	GO:0005509	calcium ion binding	inferred from electronic annotation	NA	NA	NA	ENST00000593495	Pfam	IPR000742	EGF-like domain	2.46864	3.14124
TC0100018509.hg.1	2.07639	2.86136	-1.72305	down	GLMP	glycosylated lysosomal membrane protein	coding	chr1	-	ENST00000480968	156290096	156292548	10	1q22	112770	ENST00000480968	ENSEMBL	glycosylated lysosomal membrane protein [gene_biotype:protein_coding transcript_biotype:processed_transcript]	chr1	100	100	0	NA	ENST00000480968	Q8WWB7	ENST00000480968	Hs.202522	adrenal gland| bladder| blood| bone| brain| cervix| connective tissue| embryonic tissue| eye| intestine| kidney| lung| mammary gland| muscle| ovary| pancreas| pharynx| pituitary gland| placenta| prostate| skin| spleen| stomach| testis| thyroid| uterus| vascular|adrenal tumor| breast (mammary gland) tumor| cervical tumor| chondrosarcoma| colorectal tumor| gastrointestinal tumor| germ cell tumor| g…	ENST00000480968	GO:0030522	intracellular receptor signaling pathway	inferred from mutant phenotype	ENST00000480968	GO:0005634	nucleus	inferred from direct assay	ENST00000480968	GO:0003700	transcription factor activity, sequence-specific DNA binding	inferred from mutant phenotype	NA	NA	NA	NA	NA	NA	NA	2.07639	2.86136
TC0100018562.hg.1	5.44711	6.22039	-1.70915	down	AIDA	axin interactor, dorsalization associated	coding	chr1	-	NM_022831	222668013	222713210	10	1q41	64853	NM_022831	RefSeq	Homo sapiens axin interactor, dorsalization associated (AIDA), mRNA.	chr1	100	100	0	NA	NM_022831	Q96BJ3	NM_022831	Hs.156625	adipose tissue| adrenal gland| ascites| blood| bone| brain| cervix| connective tissue| embryonic tissue| eye| heart| kidney| liver| lung| lymph node| mammary gland| mouth| muscle| ovary| pancreas| pituitary gland| placenta| prostate| salivary gland| skin| spleen| stomach| testis| thymus| umbilical cord| uterus| vascular| breast (mammary gland) tumor| chondrosarcoma| gastrointestinal tumor| germ c…	NM_022831	GO:0009953	dorsal/ventral pattern formation	inferred from sequence or structural similarity	NM_022831	GO:0005737	cytoplasm	inferred from electronic annotation	NM_022831	GO:0005515	protein binding	inferred from physical interaction	NA	NA	NA	ENST00000340020	Pfam	IPR023421	Axin interactor, dorsalization-associated protein, N-terminal	5.44711	6.22039
TC0200006627.hg.1	4.3378	5.01733	-1.60162	down	ID2	inhibitor of DNA binding 2, dominant negative helix-loop-helix protein	coding	chr2	+	NM_002166	8678845	8684453	10	2p25	3398	NM_002166	RefSeq	Homo sapiens inhibitor of DNA binding 2, dominant negative helix-loop-helix protein (ID2), mRNA.	chr2	100	100	0	NA	NM_002166	Q02363	NM_002166	Hs.180919	adrenal gland| ascites| blood| bone| bone marrow| brain| connective tissue| ear| embryonic tissue| eye| heart| intestine| kidney| larynx| liver| lung| lymph node| mammary gland| nerve| ovary| pancreas| parathyroid| pituitary gland| placenta| prostate| skin| stomach| testis| thyroid| uterus| vascular|adrenal tumor| breast (mammary gland) tumor| chondrosarcoma| colorectal tumor| gastrointestinal tu…	NA	NA	NA	NA	NM_002166	GO:0005634	nucleus	inferred from direct assay	NM_002166	GO:0005515	protein binding	inferred from physical interaction	NA	NA	NA	ENST00000234091	Pfam	IPR011598	Myc-type, basic helix-loop-helix (bHLH) domain	4.3378	5.01733
TC0200006647.hg.1	3.3577	4.52703	-2.24908	down	CPSF3	cleavage and polyadenylation specific factor 3	coding	chr2	+	NM_016207	9423537	9473110	10	2p25.1	51692	NM_016207	RefSeq	Homo sapiens cleavage and polyadenylation specific factor 3, 73kDa (CPSF3), mRNA.	chr2	100	100	0	NA	NM_016207	Q9UKF6	NM_016207	Hs.515972	adipose tissue| adrenal gland| ascites| bladder| blood| bone| bone marrow| brain| cervix| connective tissue| ear| embryonic tissue| esophagus| eye| heart| intestine| kidney| liver| lung| lymph node| mammary gland| mouth| muscle| ovary| pancreas| pharynx| pituitary gland| placenta| prostate| skin| spleen| stomach| testis| thymus| trachea| umbilical cord| uterus| vascular| bladder carcinoma| breast…	NM_016207	GO:0000398	mRNA splicing, via spliceosome	traceable author statement	NM_016207	GO:0005654	nucleoplasm	traceable author statement	NM_016207	GO:0003723	RNA binding	inferred from sequence or structural similarity	NM_016207	GenMAPP	mRNA_processing_Reactome	ENST00000238112	Pfam	IPR001279	Metallo-beta-lactamase	3.3577	4.52703
TC0200006677.hg.1	6.2649	7.0333	-1.70338	down	RRM2	ribonucleotide reductase M2	coding	chr2	+	NM_001034	10122328	10131419	10	2p25-p24	6241	NM_001034	RefSeq	Homo sapiens ribonucleotide reductase M2 (RRM2), transcript variant 2, mRNA.	chr2	100	100	0	NA	NM_001034	P31350	NM_001034	Hs.226390	adrenal gland| ascites| bladder| blood| bone| bone marrow| brain| cervix| connective tissue| embryonic tissue| esophagus| eye| heart| intestine| kidney| liver| lung| lymph| lymph node| mammary gland| mouth| muscle| nerve| ovary| pancreas| placenta| prostate| salivary gland| skin| spleen| stomach| testis| thymus| thyroid| tonsil| trachea| umbilical cord| uterus| vascular|adrenal tumor| bladder car…	NA	NA	NA	NA	NM_001034	GO:0005634	nucleus	inferred from direct assay	NM_001034	GO:0004748	ribonucleoside-diphosphate reductase activity, thioredoxin disulfide as acceptor	not recorded	NM_001034	HumanCyc	PWY-6125	ENST00000304567	Pfam	IPR000358	Ribonucleotide reductase small subunit	6.2649	7.0333
TC0200006757.hg.1	1.90596	2.74239	-1.78563	down	TRIB2	tribbles pseudokinase 2	coding	chr2	+	NM_021643	12716872	12742734	10	2p24.3	28951	NM_021643	RefSeq	Homo sapiens tribbles pseudokinase 2 (TRIB2), transcript variant 1, mRNA.	chr2	100	100	0	NA	NM_021643	Q92519	NM_021643	Hs.467751	adipose tissue| adrenal gland| blood| bone| brain| connective tissue| ear| embryonic tissue| eye| heart| intestine| kidney| liver| lung| lymph| lymph node| mammary gland| mouth| muscle| nerve| ovary| pancreas| pituitary gland| placenta| prostate| salivary gland| skin| spleen| stomach| testis| thymus| trachea| uterus| vascular| breast (mammary gland) tumor| chondrosarcoma| colorectal tumor| germ c…	NM_021643	GO:0006468	protein phosphorylation	inferred from sequence or structural similarity	NM_021643	GO:0005634	nucleus	not recorded	NM_021643	GO:0000166	nucleotide binding	inferred from sequence or structural similarity	NA	NA	NA	ENST00000155926	Pfam	IPR000719	Protein kinase domain	1.90596	2.74239
TC0200006788.hg.1	4.32392	5.42122	-2.13954	down	DDX1	DEAD (Asp-Glu-Ala-Asp) box helicase 1	coding	chr2	+	NM_004939	15591178	15631111	10	2p24	1653	NM_004939	RefSeq	Homo sapiens DEAD (Asp-Glu-Ala-Asp) box helicase 1 (DDX1), mRNA.	chr2	100	100	0	NA	NM_004939	Q92499	NM_004939	Hs.440599	adrenal gland| ascites| bladder| blood| bone| bone marrow| brain| cervix| connective tissue| ear| embryonic tissue| esophagus| eye| heart| intestine| kidney| larynx| liver| lung| lymph| lymph node| mammary gland| mouth| muscle| nerve| ovary| pancreas| pharynx| pituitary gland| placenta| prostate| skin| spleen| stomach| testis| thymus| thyroid| trachea| uterus| vascular|adrenal tumor| bladder carc…	NM_004939	GO:0000245	spliceosomal complex assembly	non-traceable author statement	NM_004939	GO:0005634	nucleus	inferred from direct assay	NM_004939	GO:0003677	DNA binding	inferred from electronic annotation	NM_004939	GenMAPP	mRNA_processing_Reactome	ENST00000233084	Pfam	IPR001650	Helicase, C-terminal	4.32392	5.42122
TC0200006900.hg.1	4.58485	3.87418	1.63656	up	GDF7	growth differentiation factor 7	coding	chr2	+	NM_182828	20666664	20679245	10	2p24.1	151449	NM_182828	RefSeq	Homo sapiens growth differentiation factor 7 (GDF7), mRNA.	chr2	100	100	0	NA	NM_182828	Q7Z4P5	NM_182828	Hs.447688	brain| kidney| testis| leukemia| normal| adult	NM_182828	GO:0007411	axon guidance	inferred from electronic annotation	NM_182828	GO:0005615	extracellular space	not recorded	NM_182828	GO:0005125	cytokine activity	not recorded	NA	NA	NA	ENST00000272224	Pfam	IPR001111	Transforming growth factor-beta, N-terminal	4.58485	3.87418
TC0200007038.hg.1	1.40414	2.00246	-1.51395	down	DRC1	dynein regulatory complex subunit 1	coding	chr2	+	NM_145038	26401916	26456711	10	2p23.3	92749	NM_145038	RefSeq	Homo sapiens dynein regulatory complex subunit 1 (DRC1), mRNA.	chr2	100	100	0	NA	NM_145038	Q96MC2	NM_145038	Hs.393714	brain| connective tissue| lung| ovary| prostate| testis| trachea| uterus| chondrosarcoma| germ cell tumor| lung tumor| normal| ovarian tumor| uterine tumor| fetus| adult	NM_145038	GO:0060285	cilium-dependent cell motility	inferred from mutant phenotype	NM_145038	GO:0005856	cytoskeleton	inferred from electronic annotation	NA	NA	NA	NA	NA	NA	NA	ENST00000288710	Pfam	IPR029440	Dynein regulatory complex protein 1, C-terminal	1.40414	2.00246
TC0200007040.hg.1	2.99978	2.27751	1.64977	up	C2orf70	chromosome 2 open reading frame 70	coding	chr2	+	NM_001105519	26562582	26579532	10	2p23.3	339778	NM_001105519	RefSeq	Homo sapiens chromosome 2 open reading frame 70 (C2orf70), mRNA.	chr2	100	100	0	NA	NM_001105519	A6NJV1	NM_001105519	Hs.407083	brain| intestine| testis| colorectal tumor| normal| fetus| adult	NA	NA	NA	NA	NM_001105519	GO:0005634	nucleus	inferred from direct assay	NA	NA	NA	NA	NA	NA	NA	ENST00000329615	Pfam	IPR018902	Uncharacterised protein family UPF0573/UPF0605	2.99978	2.27751
TC0200007115.hg.1	1.61823	3.07718	-2.74908	down	CLIP4	CAP-GLY domain containing linker protein family, member 4	coding	chr2	+	NM_001287527	29097676	29189643	10	2p23.2	79745	NM_001287527	RefSeq	Homo sapiens CAP-GLY domain containing linker protein family, member 4 (CLIP4), transcript variant 2, mRNA.	chr2	100	100	0	NA	NM_001287527	Q8N3C7	NM_001287527	Hs.122927	adipose tissue| bladder| bone marrow| brain| connective tissue| embryonic tissue| esophagus| eye| heart| intestine| kidney| larynx| liver| lung| lymph node| mammary gland| mouth| muscle| nerve| pancreas| parathyroid| pharynx| pituitary gland| placenta| prostate| skin| testis| thyroid| trachea| uterus| vascular| breast (mammary gland) tumor| chondrosarcoma| colorectal tumor| esophageal tumor| germ…	NA	NA	NA	NA	NM_001287527	GO:0016020	membrane	inferred from electronic annotation	NM_001287527	GO:0005515	protein binding	inferred from physical interaction	NA	NA	NA	ENST00000320081	Pfam	IPR000938	CAP Gly-rich domain	1.61823	3.07718
TC0200007144.hg.1	4.91841	5.79185	-1.83202	down	LCLAT1	lysocardiolipin acyltransferase 1	coding	chr2	+	NM_001002257	30447226	30644225	10	2p23.1	253558	NM_001002257	RefSeq	Homo sapiens lysocardiolipin acyltransferase 1 (LCLAT1), transcript variant 2, mRNA.	chr2	100	100	0	NA	NM_001002257	Q6UWP7	NM_001002257	Hs.468048	ascites| blood| bone| brain| connective tissue| ear| embryonic tissue| eye| heart| kidney| lung| mammary gland| mouth| muscle| pancreas| pharynx| prostate| skin| testis| thymus| trachea| uterus| vascular| breast (mammary gland) tumor| chondrosarcoma| gastrointestinal tumor| germ cell tumor| head and neck tumor| kidney tumor| leukemia| lymphoma| normal| primitive neuroectodermal tumor of the CNS| …	NA	NA	NA	NA	NM_001002257	GO:0005789	endoplasmic reticulum membrane	traceable author statement	NM_001002257	GO:0003841	1-acylglycerol-3-phosphate O-acyltransferase activity	inferred from electronic annotation	NA	NA	NA	ENST00000309052	Pfam	IPR002123	Phospholipid/glycerol acyltransferase	4.91841	5.79185
TC0200007363.hg.1	3.30225	4.01484	-1.63874	down	MTA3	metastasis associated 1 family member 3	coding	chr2	+	NM_001282755	42494569	42756947	10	2p21	57504	NM_001282755	RefSeq	Homo sapiens metastasis associated 1 family, member 3 (MTA3), transcript variant 1, mRNA.	chr2	100	100	0	NA	NM_001282755	Q9BTC8	NA	NA	NA	NM_001282755	GO:0006325	chromatin organization	traceable author statement	NM_001282755	GO:0005634	nucleus	inferred from direct assay	NM_001282755	GO:0003682	chromatin binding	inferred from electronic annotation	NA	NA	NA	ENST00000405094	Pfam	IPR000679	Zinc finger, GATA-type	3.30225	4.01484
TC0200007411.hg.1	2.54372	3.30852	-1.69914	down	PPM1B	protein phosphatase, Mg2+/Mn2+ dependent, 1B	coding	chr2	+	NM_001033557	44167969	44244384	10	2p21	5495	NM_001033557	RefSeq	Homo sapiens protein phosphatase, Mg2+/Mn2+ dependent, 1B (PPM1B), transcript variant 5, mRNA.	chr2	100	100	0	NA	NM_001033557	O75688	NM_001033557	Hs.416769	adipose tissue| adrenal gland| ascites| bladder| blood| bone| bone marrow| brain| connective tissue| ear| embryonic tissue| eye| heart| intestine| kidney| liver| lung| lymph| lymph node| mammary gland| mouth| muscle| ovary| pancreas| pharynx| placenta| prostate| skin| spleen| stomach| testis| thymus| thyroid| trachea| uterus| vascular|adrenal tumor| bladder carcinoma| breast (mammary gland) tumor…	NM_001033557	GO:0006470	protein dephosphorylation	inferred from mutant phenotype	NM_001033557	GO:0005829	cytosol	inferred from sequence or structural similarity	NM_001033557	GO:0000287	magnesium ion binding	inferred from electronic annotation	NA	NA	NA	ENST00000282412	Pfam	IPR001932	PPM-type phosphatase domain	2.54372	3.30852
TC0200007477.hg.1	3.0582	3.65555	-1.51294	down	SOCS5	suppressor of cytokine signaling 5	coding	chr2	+	NM_014011	46698952	46763129	10	2p21	9655	NM_014011	RefSeq	Homo sapiens suppressor of cytokine signaling 5 (SOCS5), transcript variant 1, mRNA.	chr2	100	100	0	NA	NM_014011	O75159	NM_014011	Hs.468426	adipose tissue| adrenal gland| bladder| blood| bone| brain| connective tissue| embryonic tissue| eye| heart| intestine| kidney| liver| lung| mammary gland| mouth| pancreas| placenta| prostate| salivary gland| skin| spleen| stomach| testis| thymus| trachea| uterus| vascular| bladder carcinoma| breast (mammary gland) tumor| chondrosarcoma| colorectal tumor| gastrointestinal tumor| germ cell tumor| …	NM_014011	GO:0007173	epidermal growth factor receptor signaling pathway	inferred from electronic annotation	NM_014011	GO:0005622	intracellular	inferred from electronic annotation	NM_014011	GO:0005154	epidermal growth factor receptor binding	inferred from electronic annotation	NA	NA	NA	ENST00000306503	Pfam	IPR000980	SH2 domain	3.0582	3.65555
TC0200007717.hg.1	2.39637	3.27043	-1.83281	down	AHSA2	AHA1, activator of heat shock 90kDa protein ATPase homolog 2 (yeast)	coding	chr2	+	NM_152392	61177418	61191203	10	2p15	130872	NM_152392	RefSeq	Homo sapiens AHA1, activator of heat shock 90kDa protein ATPase homolog 2 (yeast) (AHSA2), mRNA.	chr2	100	100	0	NA	NM_152392	Q719I0	NM_152392	Hs.655602	bladder| blood| bone| brain| connective tissue| ear| embryonic tissue| esophagus| eye| heart| intestine| kidney| larynx| liver| lung| lymph node| mammary gland| mouth| muscle| nerve| ovary| pancreas| parathyroid| placenta| prostate| skin| stomach| testis| thymus| thyroid| uterus| vascular| bladder carcinoma| breast (mammary gland) tumor| chondrosarcoma| colorectal tumor| esophageal tumor| gastroi…	NM_152392	GO:0032781	positive regulation of ATPase activity	inferred from electronic annotation	NA	NA	NA	NA	NM_152392	GO:0001671	ATPase activator activity	inferred from electronic annotation	NA	NA	NA	NA	NA	NA	NA	2.39637	3.27043
TC0200007746.hg.1	2.53355	3.88769	-2.55646	down	B3GNT2	UDP-GlcNAc:betaGal beta-1,3-N-acetylglucosaminyltransferase 2	coding	chr2	+	NM_006577	62196113	62224731	10	2p15	10678	NM_006577	RefSeq	Homo sapiens UDP-GlcNAc:betaGal beta-1,3-N-acetylglucosaminyltransferase 2 (B3GNT2), mRNA.	chr2	100	100	0	NA	NM_006577	Q9NY97	NM_006577	Hs.173203	adrenal gland| bladder| blood| bone| bone marrow| brain| connective tissue| embryonic tissue| eye| heart| intestine| kidney| liver| lung| lymph| lymph node| mammary gland| mouth| pancreas| placenta| prostate| skin| stomach| testis| trachea| uterus| vascular|adrenal tumor| bladder carcinoma| breast (mammary gland) tumor| chondrosarcoma| colorectal tumor| gastrointestinal tumor| germ cell tumor| gl…	NM_006577	GO:0005975	carbohydrate metabolic process	traceable author statement	NM_006577	GO:0000139	Golgi membrane	traceable author statement	NM_006577	GO:0008378	galactosyltransferase activity	inferred from electronic annotation	NA	NA	NA	ENST00000301998	Pfam	IPR002659	Glycosyl transferase, family 31	2.53355	3.88769
TC0200007854.hg.1	4.45358	3.68666	1.70163	up	MEIS1	Meis homeobox 1	coding	chr2	+	NM_002398	66433452	66573869	10	2p14	4211	NM_002398	RefSeq	Homo sapiens Meis homeobox 1 (MEIS1), mRNA.	chr2	100	100	0	NA	NM_002398	O00470	NM_002398	Hs.526754	adrenal gland| bone| brain| connective tissue| embryonic tissue| eye| heart| intestine| kidney| larynx| liver| lung| mammary gland| mouth| muscle| ovary| pancreas| placenta| prostate| skin| spleen| stomach| testis| trachea| umbilical cord| uterus| vascular|adrenal tumor| breast (mammary gland) tumor| chondrosarcoma| colorectal tumor| gastrointestinal tumor| germ cell tumor| head and neck tumor| k…	NA	NA	NA	NA	NM_002398	GO:0005634	nucleus	inferred from electronic annotation	NA	NA	NA	NA	NA	NA	NA	ENST00000272369	Pfam	IPR008422	Homeobox KN domain	4.45358	3.68666
TC0200007954.hg.1	5.06857	5.87474	-1.74856	down	PCYOX1	prenylcysteine oxidase 1	coding	chr2	+	NM_016297	70257386	70281191	10	2p13.3	51449	NM_016297	RefSeq	Homo sapiens prenylcysteine oxidase 1 (PCYOX1), mRNA.	chr2	100	100	0	NA	NM_016297	Q9UHG3	NM_016297	Hs.567502	adrenal gland| ascites| bladder| bone| brain| cervix| connective tissue| ear| embryonic tissue| esophagus| eye| heart| intestine| kidney| larynx| liver| lung| lymph node| mammary gland| mouth| muscle| nerve| ovary| pancreas| parathyroid| pharynx| pituitary gland| placenta| prostate| skin| spleen| stomach| testis| thymus| thyroid| trachea| uterus| vascular|adrenal tumor| bladder carcinoma| breast …	NM_016297	GO:0030327	prenylated protein catabolic process	inferred from direct assay	NM_016297	GO:0005764	lysosome	inferred from direct assay	NM_016297	GO:0001735	prenylcysteine oxidase activity	inferred from direct assay	NA	NA	NA	ENST00000264441	Pfam	IPR010795	Prenylcysteine lyase	5.06857	5.87474
TC0200008005.hg.1	6.0322	4.68918	2.53683	up	DYSF	dysferlin	coding	chr2	+	NM_001130455	71453623	71686768	10	2p13.3	8291	NM_001130455	RefSeq	Homo sapiens dysferlin (DYSF), transcript variant 2, mRNA.	chr2	100	100	0	NA	NM_001130455	O75923	NA	NA	NA	NM_001130455	GO:0001778	plasma membrane repair	inferred from electronic annotation	NA	NA	NA	NA	NM_001130455	GO:0005509	calcium ion binding	inferred from direct assay	NA	NA	NA	ENST00000258104	Pfam	IPR000008	C2 domain	6.0322	4.68918
TC0200008031.hg.1	5.8637	5.26169	1.51782	up	SPR	sepiapterin reductase (7,8-dihydrobiopterin:NADP+ oxidoreductase)	coding	chr2	+	NM_003124	72887360	72892160	10	2p14-p12	6697	NM_003124	RefSeq	Homo sapiens sepiapterin reductase (7,8-dihydrobiopterin:NADP+ oxidoreductase) (SPR), mRNA.	chr2	100	100	0	NA	NM_003124	P35270	NM_003124	Hs.301540	adipose tissue| adrenal gland| ascites| blood| bone| bone marrow| brain| cervix| connective tissue| embryonic tissue| eye| heart| intestine| kidney| liver| lung| mammary gland| muscle| ovary| pancreas| parathyroid| placenta| prostate| salivary gland| skin| spleen| stomach| testis| thymus| uterus| vascular|adrenal tumor| breast (mammary gland) tumor| cervical tumor| chondrosarcoma| colorectal tumo…	NM_003124	GO:0006558	L-phenylalanine metabolic process	inferred from electronic annotation	NM_003124	GO:0005654	nucleoplasm	inferred from direct assay	NM_003124	GO:0004033	aldo-keto reductase (NADP) activity	traceable author statement	NM_003124	HumanCyc	PWY-5664	ENST00000234454	Pfam	IPR002198	Short-chain dehydrogenase/reductase SDR	5.8637	5.26169
TC0200008041.hg.1	7.85794	8.7222	-1.8204	down	CCT7	chaperonin containing TCP1, subunit 7 (eta)	coding	chr2	+	NM_001009570	73233420	73253022	10	2p13.2	10574	NM_001009570	RefSeq	Homo sapiens chaperonin containing TCP1, subunit 7 (eta) (CCT7), transcript variant 2, mRNA.	chr2	100	100	0	NA	NM_001009570	Q99832	NA	NA	NA	NM_001009570	GO:0006457	protein folding	traceable author statement	NM_001009570	GO:0002199	zona pellucida receptor complex	inferred from electronic annotation	NM_001009570	GO:0005515	protein binding	inferred from physical interaction	NA	NA	NA	ENST00000258091	Pfam	IPR002423	Chaperonin Cpn60/TCP-1 family	7.85794	8.7222
TC0200008071.hg.1	6.6136	7.21768	-1.52001	down	MTHFD2	methylenetetrahydrofolate dehydrogenase (NADP+ dependent) 2, methenyltetrahydrofolate cyclohydrolase	coding	chr2	+	NM_006636	74198562	74217565	10	2p13.1	10797	NM_006636	RefSeq	Homo sapiens methylenetetrahydrofolate dehydrogenase (NADP+ dependent) 2, methenyltetrahydrofolate cyclohydrolase (MTHFD2), transcript variant 1, mRNA.	chr2	100	100	0	NA	NM_006636	P13995	NM_006636	Hs.469030	adipose tissue| adrenal gland| ascites| bladder| blood| bone| bone marrow| brain| cervix| connective tissue| embryonic tissue| esophagus| eye| heart| intestine| kidney| larynx| liver| lung| lymph| lymph node| mammary gland| mouth| muscle| nerve| ovary| pancreas| pharynx| pituitary gland| placenta| prostate| salivary gland| skin| spleen| stomach| testis| thymus| thyroid| tonsil| trachea| uterus| v…	NM_006636	GO:0006730	one-carbon metabolic process	not recorded	NM_006636	GO:0005615	extracellular space	inferred from direct assay	NA	NA	NA	NA	NM_006636	GenMAPP	Nucleotide_Metabolism	ENST00000394053	Pfam	IPR020630	Tetrahydrofolate dehydrogenase/cyclohydrolase, catalytic domain	6.6136	7.21768
TC0200008259.hg.1	8.16684	9.1377	-1.96001	down	MAT2A	methionine adenosyltransferase II, alpha	coding	chr2	+	NM_005911	85538978	85545280	10	2p11.2	4144	NM_005911	RefSeq	Homo sapiens methionine adenosyltransferase II, alpha (MAT2A), mRNA.	chr2	100	100	0	NA	NM_005911	P31153	NM_005911	Hs.516157	adipose tissue| adrenal gland| ascites| bladder| blood| bone| bone marrow| brain| cervix| connective tissue| ear| embryonic tissue| esophagus| eye| heart| intestine| kidney| larynx| liver| lung| lymph| lymph node| mammary gland| mouth| muscle| nerve| ovary| pancreas| parathyroid| pharynx| pituitary gland| placenta| prostate| salivary gland| skin| spleen| stomach| testis| thymus| thyroid| tonsil| …	NM_005911	GO:0006556	S-adenosylmethionine biosynthetic process	inferred from direct assay	NM_005911	GO:0005829	cytosol	not recorded	NM_005911	GO:0004478	methionine adenosyltransferase activity	inferred from direct assay	NM_005911	HumanCyc	SAM-PWY	ENST00000306434	Pfam	IPR022628	S-adenosylmethionine synthetase, N-terminal	8.16684	9.1377
TC0200008263.hg.1	6.93561	7.73428	-1.7395	down	USP39	ubiquitin specific peptidase 39	coding	chr2	+	NM_001256725	85602842	85649284	10	2p11.2	10713	NM_001256725	RefSeq	Homo sapiens ubiquitin specific peptidase 39 (USP39), transcript variant 2, mRNA.	chr2	100	100	0	NA	NM_001256725	Q53GS9	NA	NA	NA	NA	NA	NA	NA	NM_001256725	GO:0005681	spliceosomal complex	inferred from electronic annotation	NM_001256725	GO:0008270	zinc ion binding	inferred from electronic annotation	NA	NA	NA	ENST00000323701	Pfam	IPR001394	Peptidase C19, ubiquitin carboxyl-terminal hydrolase	6.93561	7.73428
TC0200008502.hg.1	3.27313	4.65105	-2.59894	down	NCAPH	non-SMC condensin I complex subunit H	coding	chr2	+	NM_001281710	96335741	96377095	10	2q11.2	23397	NM_001281710	RefSeq	Homo sapiens non-SMC condensin I complex, subunit H (NCAPH), transcript variant 2, mRNA.	chr2	100	100	0	NA	NM_001281710	Q15003	NM_001281710	Hs.308045	adrenal gland| ascites| bladder| blood| bone| bone marrow| brain| connective tissue| embryonic tissue| esophagus| eye| intestine| kidney| larynx| liver| lung| lymph node| mammary gland| mouth| muscle| ovary| pancreas| placenta| skin| spleen| stomach| testis| thymus| tonsil| uterus| vascular|adrenal tumor| breast (mammary gland) tumor| chondrosarcoma| colorectal tumor| esophageal tumor| gastrointe…	NM_001281710	GO:0000278	mitotic cell cycle	traceable author statement	NM_001281710	GO:0000796	condensin complex	inferred from direct assay	NM_001281710	GO:0005515	protein binding	inferred from physical interaction	NA	NA	NA	ENST00000240423	Pfam	IPR022816	Condensin complex subunit 2/barren	3.27313	4.65105
TC0200008587.hg.1	4.41761	5.01515	-1.51313	down	EIF5B	eukaryotic translation initiation factor 5B	coding	chr2	+	NM_015904	99337353	99401326	10	2q11.2	9669	NM_015904	RefSeq	Homo sapiens eukaryotic translation initiation factor 5B (EIF5B), mRNA.	chr2	100	100	0	NA	NM_015904	O60841	NM_015904	Hs.158688	adrenal gland| ascites| bladder| blood| bone| bone marrow| brain| cervix| connective tissue| ear| embryonic tissue| esophagus| eye| heart| intestine| kidney| larynx| liver| lung| lymph| lymph node| mammary gland| mouth| muscle| nerve| ovary| pancreas| pharynx| pituitary gland| placenta| prostate| salivary gland| skin| spleen| stomach| testis| thymus| thyroid| tonsil| trachea| umbilical cord| uter…	NM_015904	GO:0006412	translation	traceable author statement	NM_015904	GO:0005634	nucleus	inferred from direct assay	NM_015904	GO:0003743	translation initiation factor activity	inferred from direct assay	NM_015904	GenMAPP	Translation_Factors	ENST00000289371	Pfam	IPR004161	Translation elongation factor EFTu/EF1A, domain 2	4.41761	5.01515
TC0200008682.hg.1	2.01191	2.89437	-1.84352	down	TMEM182	transmembrane protein 182	coding	chr2	+	NM_144632	102736908	102843893	10	2q12.1	130827	NM_144632	RefSeq	Homo sapiens transmembrane protein 182 (TMEM182), mRNA.	chr2	100	100	0	NA	NM_144632	Q6ZP80	NM_144632	Hs.436203	bone| bone marrow| brain| embryonic tissue| eye| heart| kidney| liver| lung| lymph node| mammary gland| mouth| muscle| pancreas| pituitary gland| placenta| prostate| skin| stomach| testis| breast (mammary gland) tumor| gastrointestinal tumor| germ cell tumor| head and neck tumor| leukemia| lung tumor| lymphoma| normal| primitive neuroectodermal tumor of the CNS| prostate cancer| skin tumor|embryo…	NA	NA	NA	NA	NM_144632	GO:0016021	integral component of membrane	inferred from electronic annotation	NM_144632	GO:0005515	protein binding	inferred from physical interaction	NA	NA	NA	ENST00000409173	Pfam	IPR004031	PMP-22/EMP/MP20/Claudin superfamily	2.01191	2.89437
TC0200008724.hg.1	3.84842	4.47764	-1.54673	down	MRPS9	mitochondrial ribosomal protein S9	coding	chr2	+	NM_182640	105037983	105099960	10	2q12.1	64965	NM_182640	RefSeq	Homo sapiens mitochondrial ribosomal protein S9 (MRPS9), mRNA.	chr2	100	100	0	NA	NM_182640	P82933	NM_182640	Hs.590900	ascites| blood| brain| connective tissue| embryonic tissue| esophagus| eye| heart| intestine| kidney| liver| lung| lymph| lymph node| mammary gland| muscle| ovary| pancreas| pharynx| pituitary gland| prostate| skin| stomach| testis| umbilical cord| uterus| breast (mammary gland) tumor| chondrosarcoma| colorectal tumor| gastrointestinal tumor| germ cell tumor| glioma| kidney tumor| leukemia| liver…	NM_182640	GO:0000462	maturation of SSU-rRNA from tricistronic rRNA transcript (SSU-rRNA, 5.8S rRNA, LSU-rRNA)	not recorded	NM_182640	GO:0005730	nucleolus	inferred from direct assay	NM_182640	GO:0003735	structural constituent of ribosome	not recorded	NA	NA	NA	ENST00000258455	Pfam	IPR000754	Ribosomal protein S9	3.84842	4.47764
TC0200008921.hg.1	4.82361	5.52481	-1.62586	down	TTL	tubulin tyrosine ligase	coding	chr2	+	NM_153712	112482154	112541739	10	2q13	150465	NM_153712	RefSeq	Homo sapiens tubulin tyrosine ligase (TTL), mRNA.	chr2	100	100	0	NA	NM_153712	Q8NG68	NM_153712	Hs.358997	ascites| bladder| blood| bone| brain| cervix| connective tissue| ear| embryonic tissue| esophagus| eye| heart| intestine| kidney| larynx| liver| lung| lymph node| mammary gland| mouth| nerve| ovary| pancreas| parathyroid| pharynx| placenta| prostate| salivary gland| skin| spleen| stomach| thymus| thyroid| uterus| vascular| bladder carcinoma| breast (mammary gland) tumor| cervical tumor| chondrosa…	NM_153712	GO:0000226	microtubule cytoskeleton organization	inferred from electronic annotation	NA	NA	NA	NA	NM_153712	GO:0004835	tubulin-tyrosine ligase activity	inferred from electronic annotation	NA	NA	NA	ENST00000233336	Pfam	IPR004344	Tubulin-tyrosine ligase/Tubulin polyglutamylase	4.82361	5.52481
TC0200008923.hg.1	3.39076	4.19981	-1.75206	down	POLR1B	polymerase (RNA) I polypeptide B	coding	chr2	+	NM_001137604	112541915	112577152	10	2q13	84172	NM_001137604	RefSeq	Homo sapiens polymerase (RNA) I polypeptide B, 128kDa (POLR1B), transcript variant 2, mRNA.	chr2	100	100	0	NA	NM_001137604	Q9H9Y6	NM_001137604	Hs.745127	adrenal gland| ascites| bladder| blood| bone| bone marrow| brain| cervix| connective tissue| embryonic tissue| eye| heart| intestine| kidney| liver| lung| lymph node| mammary gland| mouth| muscle| ovary| pancreas| pharynx| placenta| prostate| skin| spleen| stomach| testis| thymus| thyroid| trachea| uterus|adrenal tumor| breast (mammary gland) tumor| cervical tumor| chondrosarcoma| colorectal tumo…	NA	NA	NA	NA	NM_001137604	GO:0005654	nucleoplasm	traceable author statement	NA	NA	NA	NA	NM_001137604	GenMAPP	RNA_transcription_Reactome	ENST00000263331	Pfam	IPR007120	DNA-directed RNA polymerase, subunit 2, domain 6	3.39076	4.19981
TC0200008930.hg.1	5.26422	6.36461	-2.14413	down	SLC20A1	solute carrier family 20 (phosphate transporter), member 1	coding	chr2	+	NM_005415	112645857	112663827	10	2q13	6574	NM_005415	RefSeq	Homo sapiens solute carrier family 20 (phosphate transporter), member 1 (SLC20A1), mRNA.	chr2	100	100	0	NA	NM_005415	Q8WUM9	NM_005415	Hs.187946	adrenal gland| bladder| blood| bone| bone marrow| brain| cervix| connective tissue| embryonic tissue| eye| heart| intestine| kidney| larynx| liver| lung| lymph| lymph node| mammary gland| mouth| muscle| nerve| ovary| pancreas| pharynx| pituitary gland| placenta| prostate| salivary gland| skin| spleen| stomach| testis| thymus| thyroid| trachea| uterus| vascular|adrenal tumor| bladder carcinoma| br…	NM_005415	GO:0006796	phosphate-containing compound metabolic process	traceable author statement	NM_005415	GO:0005886	plasma membrane	traceable author statement	NM_005415	GO:0004871	signal transducer activity	inferred from mutant phenotype	NA	NA	NA	ENST00000272542	Pfam	IPR001204	Phosphate transporter	5.26422	6.36461
TC0200009041.hg.1	5.706	6.56428	-1.81288	down	DDX18	DEAD (Asp-Glu-Ala-Asp) box polypeptide 18	coding	chr2	+	NM_006773	117814650	117832379	10	2q14.1	8886	NM_006773	RefSeq	Homo sapiens DEAD (Asp-Glu-Ala-Asp) box polypeptide 18 (DDX18), mRNA.	chr2	100	100	0	NA	NM_006773	Q9NVP1	NM_006773	Hs.744922	adipose tissue| adrenal gland| ascites| bladder| blood| bone| bone marrow| brain| cervix| connective tissue| embryonic tissue| esophagus| eye| heart| intestine| kidney| liver| lung| lymph| lymph node| mammary gland| mouth| muscle| ovary| pancreas| parathyroid| pituitary gland| placenta| prostate| skin| spleen| stomach| testis| thymus| thyroid| trachea| uterus| vascular|adrenal tumor| breast (mamm…	NM_006773	GO:0010501	RNA secondary structure unwinding	not recorded	NM_006773	GO:0005730	nucleolus	inferred from direct assay	NM_006773	GO:0004004	ATP-dependent RNA helicase activity	traceable author statement	NA	NA	NA	ENST00000263239	Pfam	IPR001650	Helicase, C-terminal	5.706	6.56428
TC0200009078.hg.1	2.93102	3.74109	-1.75329	down	EPB41L5	erythrocyte membrane protein band 4.1 like 5	coding	chr2	+	NM_001184937	120013005	120179121	10	2q14.2	57669	NM_001184937	RefSeq	Homo sapiens erythrocyte membrane protein band 4.1 like 5 (EPB41L5), transcript variant 2, mRNA.	chr2	100	100	0	NA	NM_001184937	Q9HCM4	NM_001184937	Hs.369232	ascites| bladder| brain| connective tissue| ear| embryonic tissue| eye| heart| intestine| kidney| larynx| liver| lung| lymph node| mammary gland| muscle| nerve| ovary| pancreas| pharynx| placenta| prostate| salivary gland| skin| testis| trachea| uterus| vascular| breast (mammary gland) tumor| chondrosarcoma| gastrointestinal tumor| germ cell tumor| glioma| head and neck tumor| kidney tumor| liver…	NA	NA	NA	NA	NM_001184937	GO:0005634	nucleus	inferred from direct assay	NM_001184937	GO:0008092	cytoskeletal protein binding	inferred from electronic annotation	NA	NA	NA	ENST00000263713	Pfam	IPR014847	FERM adjacent (FA)	2.93102	3.74109
TC0200009239.hg.1	3.07449	3.74252	-1.5889	down	UGGT1	UDP-glucose glycoprotein glucosyltransferase 1	coding	chr2	+	NM_020120	128091180	128195677	10	2q14.3	56886	NM_020120	RefSeq	Homo sapiens UDP-glucose glycoprotein glucosyltransferase 1 (UGGT1), transcript variant 1, mRNA.	chr2	100	100	0	NA	NM_020120	Q9NYU2	NM_020120	Hs.743306	adrenal gland| ascites| bladder| blood| bone| bone marrow| brain| connective tissue| embryonic tissue| eye| heart| intestine| kidney| liver| lung| lymph| lymph node| mammary gland| mouth| muscle| nerve| ovary| pancreas| pituitary gland| placenta| prostate| skin| spleen| stomach| testis| thymus| thyroid| trachea| uterus| vascular|adrenal tumor| breast (mammary gland) tumor| chondrosarcoma| colorec…	NM_020120	GO:0006457	protein folding	traceable author statement	NM_020120	GO:0005783	endoplasmic reticulum	inferred from direct assay	NM_020120	GO:0003980	UDP-glucose:glycoprotein glucosyltransferase activity	inferred from direct assay	NA	NA	NA	ENST00000259253	Pfam	IPR009448	UDP-glucose:Glycoprotein Glucosyltransferase	3.07449	3.74252
TC0200009487.hg.1	1.47939	2.70399	-2.33691	down	SPOPL	speckle-type POZ protein-like	coding	chr2	+	NM_001001664	138501780	138574458	10	2q22.1	339745	NM_001001664	RefSeq	Homo sapiens speckle-type POZ protein-like (SPOPL), mRNA.	chr2	100	100	0	NA	NM_001001664	Q6IQ16	NM_001001664	Hs.333297	adipose tissue| adrenal gland| ascites| bladder| blood| bone marrow| brain| connective tissue| embryonic tissue| eye| heart| intestine| kidney| liver| lung| lymph node| mammary gland| mouth| muscle| ovary| pancreas| placenta| prostate| salivary gland| skin| spleen| stomach| testis| trachea| uterus| vascular| breast (mammary gland) tumor| chondrosarcoma| gastrointestinal tumor| germ cell tumor| gl…	NM_001001664	GO:0016567	protein ubiquitination	inferred from electronic annotation	NM_001001664	GO:0005634	nucleus	inferred from electronic annotation	NM_001001664	GO:0005515	protein binding	inferred from physical interaction	NA	NA	NA	ENST00000280098	Pfam	IPR000210	BTB/POZ domain	1.47939	2.70399
TC0200009680.hg.1	2.19846	3.18289	-1.97853	down	FMNL2	formin like 2	coding	chr2	+	NM_052905	152335237	152649834	10	2q23.3	114793	NM_052905	RefSeq	Homo sapiens formin-like 2 (FMNL2), mRNA.	chr2	100	100	0	NA	NM_052905	Q96PY5	NM_052905	Hs.654630	adrenal gland| ascites| bone| brain| connective tissue| ear| embryonic tissue| eye| heart| intestine| kidney| liver| lung| lymph node| mammary gland| mouth| muscle| nerve| pancreas| pituitary gland| placenta| prostate| skin| stomach| testis| thyroid| uterus| vascular|adrenal tumor| breast (mammary gland) tumor| chondrosarcoma| colorectal tumor| gastrointestinal tumor| germ cell tumor| glioma| hea…	NM_052905	GO:0007010	cytoskeleton organization	inferred from mutant phenotype	NM_052905	GO:0005829	cytosol	traceable author statement	NM_052905	GO:0003779	actin binding	inferred from electronic annotation	NA	NA	NA	ENST00000288670	Pfam	IPR010472	Formin, FH3 domain	2.19846	3.18289
TC0200009806.hg.1	7.61895	6.23056	2.61786	up	TANK	TRAF family member-associated NFKB activator	coding	chr2	+	NM_001199135	161136908	161236221	10	2q24.2	10010	NM_001199135	RefSeq	Homo sapiens TRAF family member-associated NFKB activator (TANK), transcript variant 3, mRNA.	chr2	100	100	0	NA	NM_001199135	Q92844	NA	NA	NA	NA	NA	NA	NA	NM_001199135	GO:0005737	cytoplasm	inferred from direct assay	NM_001199135	GO:0005515	protein binding	inferred from physical interaction	NA	NA	NA	ENST00000259075	Pfam	IPR024581	Tbk1/Ikki binding domain	7.61895	6.23056
TC0200009895.hg.1	3.65511	4.39288	-1.66759	down	CERS6	ceramide synthase 6	coding	chr2	+	NM_001256126	168455862	168775137	10	2q24.3	253782	NM_001256126	RefSeq	Homo sapiens ceramide synthase 6 (CERS6), transcript variant 1, mRNA.	chr2	100	100	0	NA	NM_001256126	Q6ZMG9	NM_001256126	Hs.506829	adipose tissue| adrenal gland| ascites| bladder| blood| brain| ear| embryonic tissue| esophagus| eye| heart| intestine| kidney| liver| lung| lymph node| mammary gland| mouth| muscle| ovary| pancreas| parathyroid| placenta| prostate| skin| stomach| testis| thymus| thyroid| trachea| uterus| vascular|adrenal tumor| breast (mammary gland) tumor| colorectal tumor| esophageal tumor| gastrointestinal tu…	NM_001256126	GO:0006665	sphingolipid metabolic process	traceable author statement	NM_001256126	GO:0005789	endoplasmic reticulum membrane	traceable author statement	NM_001256126	GO:0003677	DNA binding	inferred from electronic annotation	NA	NA	NA	ENST00000305747	Pfam	IPR001356	Homeobox domain	3.65511	4.39288
TC0200009905.hg.1	2.36277	3.11133	-1.68012	down	DHRS9	dehydrogenase/reductase (SDR family) member 9	coding	chr2	+	NM_001142270	169064789	169096167	10	2q31.1	10170	NM_001142270	RefSeq	Homo sapiens dehydrogenase/reductase (SDR family) member 9 (DHRS9), transcript variant 3, mRNA.	chr2	100	100	0	NA	NM_001142270	Q9BPW9	NM_001142270	Hs.179608	adrenal gland| ascites| blood| bone| brain| cervix| connective tissue| intestine| lung| lymph node| ovary| pancreas| pharynx| placenta| skin| testis| trachea| uterus|adrenal tumor| chondrosarcoma| colorectal tumor| gastrointestinal tumor| germ cell tumor| leukemia| normal| pancreatic tumor| uterine tumor| fetus| infant| adult	NM_001142270	GO:0008209	androgen metabolic process	inferred from direct assay	NM_001142270	GO:0005789	endoplasmic reticulum membrane	traceable author statement	NM_001142270	GO:0004022	alcohol dehydrogenase (NAD) activity	inferred from direct assay	NA	NA	NA	ENST00000357546	Pfam	IPR002198	Short-chain dehydrogenase/reductase SDR	2.36277	3.11133
TC0200009927.hg.1	1.3036	2.78034	-2.78318	down	MYO3B	myosin IIIB	coding	chr2	+	NM_001083615	170178145	170655171	10	2q31.1-q31.2	140469	NM_001083615	RefSeq	Homo sapiens myosin IIIB (MYO3B), transcript variant 1, mRNA.	chr2	100	100	0	NA	NM_001083615	Q8WXR4	NM_001083615	Hs.671900	embryonic tissue| kidney| lung| mammary gland| mouth| muscle| pituitary gland| skin| testis| breast (mammary gland) tumor| head and neck tumor| normal| skin tumor| adult	NM_001083615	GO:0007601	visual perception	inferred from electronic annotation	NM_001083615	GO:0001750	photoreceptor outer segment	inferred from electronic annotation	NM_001083615	GO:0000146	microfilament motor activity	inferred from electronic annotation	NA	NA	NA	ENST00000408978	Pfam	IPR000048	IQ motif, EF-hand binding site	1.3036	2.78034
TC0200009938.hg.1	5.33779	6.37848	-2.05722	down	GORASP2	golgi reassembly stacking protein 2	coding	chr2	+	NM_001201428	170928438	170967133	10	2q31.1	26003	NM_001201428	RefSeq	Homo sapiens golgi reassembly stacking protein 2, 55kDa (GORASP2), transcript variant 2, mRNA.	chr2	100	100	0	NA	NM_001201428	Q9H8Y8	NM_001201428	Hs.431317	adrenal gland| ascites| bladder| blood| bone| bone marrow| brain| cervix| connective tissue| ear| embryonic tissue| esophagus| eye| heart| intestine| kidney| larynx| liver| lung| lymph| lymph node| mammary gland| mouth| muscle| nerve| ovary| pancreas| parathyroid| pituitary gland| placenta| prostate| salivary gland| skin| spleen| stomach| testis| thymus| thyroid| tonsil| trachea| umbilical cord| …	NM_001201428	GO:0000278	mitotic cell cycle	traceable author statement	NM_001201428	GO:0000139	Golgi membrane	traceable author statement	NM_001201428	GO:0005515	protein binding	inferred from physical interaction	NA	NA	NA	ENST00000234160	Pfam	IPR024958	GRASP55/65 PDZ-like domain	5.33779	6.37848
TC0200009955.hg.1	4.14713	5.60374	-2.74461	down	CYBRD1	cytochrome b reductase 1	coding	chr2	+	NM_001127383	171522247	171558133	10	2q31.1	79901	NM_001127383	RefSeq	Homo sapiens cytochrome b reductase 1 (CYBRD1), transcript variant 2, mRNA.	chr2	100	100	0	NA	NM_001127383	Q53TN4	NM_001127383	Hs.221941	adipose tissue| adrenal gland| bladder| blood| bone| bone marrow| brain| connective tissue| ear| embryonic tissue| esophagus| eye| heart| intestine| kidney| liver| lung| lymph| lymph node| mammary gland| mouth| muscle| nerve| ovary| pancreas| parathyroid| placenta| prostate| salivary gland| skin| spleen| stomach| testis| thymus| thyroid| trachea| umbilical cord| uterus| vascular|adrenal tumor| bl…	NM_001127383	GO:0006879	cellular iron ion homeostasis	traceable author statement	NM_001127383	GO:0005886	plasma membrane	traceable author statement	NM_001127383	GO:0000293	ferric-chelate reductase activity	inferred from direct assay	NA	NA	NA	ENST00000321348	Pfam	IPR004877	Cytochrome b561 domain	4.14713	5.60374
TC0200009966.hg.1	2.18692	2.89223	-1.63049	down	METAP1D	methionyl aminopeptidase type 1D (mitochondrial)	coding	chr2	+	NM_199227	171999583	172082430	10	2q31.1	254042	NM_199227	RefSeq	Homo sapiens methionyl aminopeptidase type 1D (mitochondrial) (METAP1D), mRNA.	chr2	100	100	0	NA	NM_199227	Q6UB28	NM_199227	Hs.298250	adrenal gland| blood| bone| brain| embryonic tissue| intestine| kidney| liver| mammary gland| nerve| ovary| placenta| prostate| salivary gland| skin| testis| uterus|adrenal tumor| breast (mammary gland) tumor| colorectal tumor| germ cell tumor| glioma| head and neck tumor| liver tumor| normal| ovarian tumor| skin tumor|embryoid body| fetus| juvenile| adult	NM_199227	GO:0006508	proteolysis	inferred from electronic annotation	NM_199227	GO:0005739	mitochondrion	inferred from direct assay	NM_199227	GO:0004177	aminopeptidase activity	traceable author statement	NA	NA	NA	ENST00000315796	Pfam	IPR000994	Peptidase M24, structural domain	2.18692	2.89223
TC0200009986.hg.1	2.13576	3.96514	-3.55384	down	ZAK	sterile alpha motif and leucine zipper containing kinase AZK	coding	chr2	+	NM_016653	173075435	173268010	10	2q24.2	51776	NM_016653	RefSeq	Homo sapiens sterile alpha motif and leucine zipper containing kinase AZK (ZAK), transcript variant 1, mRNA.	chr2	100	100	0	NA	NM_016653	Q9NYL2	NM_016653	Hs.444451	adipose tissue| adrenal gland| ascites| bladder| blood| bone| bone marrow| brain| cervix| connective tissue| ear| embryonic tissue| esophagus| eye| heart| intestine| kidney| larynx| liver| lung| lymph node| mammary gland| mouth| muscle| nerve| ovary| pancreas| parathyroid| pharynx| placenta| prostate| skin| spleen| stomach| testis| thymus| thyroid| trachea| umbilical cord| uterus| vascular|adrena…	NM_016653	GO:0000075	cell cycle checkpoint	inferred from direct assay	NM_016653	GO:0005634	nucleus	inferred from electronic annotation	NM_016653	GO:0000287	magnesium ion binding	inferred from direct assay	NA	NA	NA	ENST00000338983	Pfam	IPR001245	Serine-threonine/tyrosine-protein kinase catalytic domain	2.13576	3.96514
TC0200010053.hg.1	5.53805	4.87794	1.58021	up	HOXD1	homeobox D1	coding	chr2	+	NM_024501	176188579	176190907	10	2q31.1	3231	NM_024501	RefSeq	Homo sapiens homeobox D1 (HOXD1), mRNA.	chr2	100	100	0	NA	NM_024501	Q9GZZ0	NM_024501	Hs.83465	bladder| brain| heart| intestine| kidney| liver| pancreas| skin| spleen| testis| bladder carcinoma| germ cell tumor| leukemia| liver tumor| non-neoplasia| normal| pancreatic tumor| skin tumor| fetus| adult	NM_024501	GO:0006351	transcription, DNA-templated	inferred from electronic annotation	NM_024501	GO:0005634	nucleus	inferred from electronic annotation	NM_024501	GO:0043565	sequence-specific DNA binding	inferred from electronic annotation	NA	NA	NA	ENST00000331462	Pfam	IPR001356	Homeobox domain	5.53805	4.87794
TC0200010100.hg.1	5.21144	5.89994	-1.61161	down	AGPS	alkylglycerone phosphate synthase	coding	chr2	+	NM_003659	177392644	177543836	10	2q31.2	8540	NM_003659	RefSeq	Homo sapiens alkylglycerone phosphate synthase (AGPS), mRNA.	chr2	100	100	0	NA	NM_003659	O00116	NM_003659	Hs.516543	adrenal gland| bladder| blood| bone| bone marrow| brain| cervix| connective tissue| embryonic tissue| eye| heart| intestine| kidney| liver| lung| lymph node| mammary gland| mouth| muscle| nerve| ovary| pancreas| parathyroid| placenta| prostate| skin| spleen| stomach| testis| thymus| umbilical cord| uterus| vascular| bladder carcinoma| chondrosarcoma| colorectal tumor| gastrointestinal tumor| germ…	NM_003659	GO:0008610	lipid biosynthetic process	inferred from direct assay	NM_003659	GO:0005730	nucleolus	inferred from direct assay	NM_003659	GO:0005515	protein binding	inferred from physical interaction	NA	NA	NA	ENST00000264167	Pfam	IPR004113	FAD-linked oxidase, C-terminal	5.21144	5.89994
TC0200010219.hg.1	4.54953	5.31498	-1.6999	down	FAM171B	family with sequence similarity 171, member B	coding	chr2	+	NM_177454	186693971	186765965	10	2q32.1	165215	NM_177454	RefSeq	Homo sapiens family with sequence similarity 171, member B (FAM171B), mRNA.	chr2	100	100	0	NA	NM_177454	Q6P995	NM_177454	Hs.28872	bladder| bone marrow| brain| ear| embryonic tissue| eye| intestine| kidney| lung| mammary gland| muscle| nerve| pancreas| pituitary gland| placenta| prostate| skin| uterus| colorectal tumor| gastrointestinal tumor| glioma| kidney tumor| leukemia| lung tumor| normal| pancreatic tumor| primitive neuroectodermal tumor of the CNS| uterine tumor| fetus| juvenile| adult	NA	NA	NA	NA	NM_177454	GO:0016021	integral component of membrane	inferred from electronic annotation	NM_177454	GO:0003677	DNA binding	inferred from electronic annotation	NA	NA	NA	ENST00000304698	Pfam	IPR018890	Uncharacterised protein family FAM171	4.54953	5.31498
TC0200010328.hg.1	6.1472	7.48148	-2.52149	down	SLC39A10	solute carrier family 39 (zinc transporter), member 10	coding	chr2	+	NM_001127257	195575977	195737702	10	2q32.3	57181	NM_001127257	RefSeq	Homo sapiens solute carrier family 39 (zinc transporter), member 10 (SLC39A10), transcript variant 1, mRNA.	chr2	100	100	0	NA	NM_001127257	Q9ULF5	NM_001127257	Hs.650158	adrenal gland| ascites| bladder| blood| bone| bone marrow| brain| cervix| connective tissue| embryonic tissue| esophagus| intestine| kidney| liver| lung| lymph| lymph node| mammary gland| mouth| muscle| ovary| pancreas| pituitary gland| placenta| prostate| skin| spleen| stomach| testis| thymus| thyroid| trachea| uterus| vascular| bladder carcinoma| cervical tumor| chondrosarcoma| esophageal tumor…	NM_001127257	GO:0002903	negative regulation of B cell apoptotic process	inferred from electronic annotation	NM_001127257	GO:0005886	plasma membrane	inferred from electronic annotation	NM_001127257	GO:0005385	zinc ion transmembrane transporter activity	inferred from electronic annotation	NA	NA	NA	ENST00000359634	Pfam	IPR003689	Zinc/iron permease	6.1472	7.48148
TC0200010447.hg.1	3.87413	3.12589	1.67974	up	CASP8	caspase 8, apoptosis-related cysteine peptidase	coding	chr2	+	NM_001080124	201233443	201287711	10	2q33-q34	841	NM_001080124	RefSeq	Homo sapiens caspase 8, apoptosis-related cysteine peptidase (CASP8), transcript variant F, mRNA.	chr2	100	100	0	NA	NM_001080124	Q14790	NM_001080124	Hs.599762	ascites| blood| bone| bone marrow| brain| eye| heart| intestine| kidney| liver| lung| lymph node| mammary gland| muscle| nerve| ovary| pancreas| pharynx| placenta| prostate| salivary gland| skin| spleen| stomach| testis| thymus| uterus| vascular| breast (mammary gland) tumor| chondrosarcoma| colorectal tumor| gastrointestinal tumor| germ cell tumor| glioma| kidney tumor| leukemia| liver tumor| lu…	NA	NA	NA	NA	NA	NA	NA	NA	NA	NA	NA	NA	NM_001080124	GenMAPP	Apoptosis	ENST00000264274	Pfam	IPR001875	Death effector domain	3.87413	3.12589
TC0200010473.hg.1	2.12745	3.28512	-2.23097	down	FZD7	frizzled class receptor 7	coding	chr2	+	NM_003507	202034587	202038445	10	2q33	8324	NM_003507	RefSeq	Homo sapiens frizzled class receptor 7 (FZD7), mRNA.	chr2	100	100	0	NA	NM_003507	O75084	NM_003507	Hs.173859	adrenal gland| bone| brain| connective tissue| ear| embryonic tissue| eye| heart| intestine| kidney| liver| lung| lymph| lymph node| mammary gland| mouth| muscle| ovary| pancreas| pharynx| placenta| prostate| skin| stomach| testis| uterus| vascular|adrenal tumor| chondrosarcoma| gastrointestinal tumor| germ cell tumor| glioma| head and neck tumor| kidney tumor| liver tumor| lung tumor| lymphoma| …	NM_003507	GO:0006355	regulation of transcription, DNA-templated	inferred from mutant phenotype	NM_003507	GO:0005886	plasma membrane	inferred from direct assay	NM_003507	GO:0004930	G-protein coupled receptor activity	not recorded	NM_003507	GenMAPP	Wnt_signaling	ENST00000286201	Pfam	IPR000539	Frizzled protein	2.12745	3.28512
TC0200010518.hg.1	3.92595	4.89325	-1.95518	down	ABI2	abl-interactor 2	coding	chr2	+	NM_001282925	203328219	203447723	10	2q33	10152	NM_001282925	RefSeq	Homo sapiens abl-interactor 2 (ABI2), transcript variant 1, mRNA.	chr2	100	100	0	NA	NM_001282925	Q9NYB9	NA	NA	NA	NA	NA	NA	NA	NA	NA	NA	NA	NA	NA	NA	NA	NA	NA	NA	ENST00000261016	Pfam	IPR001452	SH3 domain	3.92595	4.89325
TC0200010574.hg.1	4.31473	5.03766	-1.65054	down	AC017081.1	The sequence shown here is derived from an Ensembl automatic analysis pipeline and should be considered as preliminary data. (from UniProt A0A096LPE4)	coding	chr2	+	uc061rtu.1	206355739	206356119	10	NA	NA	uc061rtu.1	UCSC Genes	Uncharacterized protein [Source:UniProtKB/TrEMBL;Acc:A0A096LPE4]	chr2	100	100	0	NA	ENST00000625193	A0A096LPE4	NA	NA	NA	NA	NA	NA	NA	NA	NA	NA	NA	NA	NA	NA	NA	NA	NA	NA	NA	NA	NA	NA	4.31473	5.03766
TC0200010577.hg.1	1.56147	2.20112	-1.55795	down	ADAM23	ADAM metallopeptidase domain 23	coding	chr2	+	NM_003812	206443539	206621131	10	2q33	8745	NM_003812	RefSeq	Homo sapiens ADAM metallopeptidase domain 23 (ADAM23), mRNA.	chr2	100	100	0	NA	NM_003812	O75077	NM_003812	Hs.591643	blood| brain| connective tissue| ear| embryonic tissue| esophagus| eye| kidney| liver| lung| mammary gland| mouth| muscle| parathyroid| skin| thymus| uterus| vascular| breast (mammary gland) tumor| esophageal tumor| glioma| head and neck tumor| kidney tumor| leukemia| normal| primitive neuroectodermal tumor of the CNS| skin tumor| soft tissue/muscle tissue tumor|embryoid body| fetus| juvenile| ad…	NM_003812	GO:0006508	proteolysis	inferred from electronic annotation	NM_003812	GO:0005576	extracellular region	inferred from electronic annotation	NM_003812	GO:0004222	metalloendopeptidase activity	inferred from electronic annotation	NA	NA	NA	ENST00000264377	Pfam	IPR001590	Peptidase M12B, ADAM/reprolysin	1.56147	2.20112
TC0200010745.hg.1	7.89137	7.27155	1.53668	up	IGFBP2	insulin like growth factor binding protein 2	coding	chr2	+	NM_000597	216632828	216664436	10	2q35	3485	NM_000597	RefSeq	Homo sapiens insulin-like growth factor binding protein 2, 36kDa (IGFBP2), transcript variant 1, mRNA.	chr2	100	100	0	NA	NM_000597	P18065	NM_000597	Hs.438102	adrenal gland| bladder| blood| bone| bone marrow| brain| connective tissue| embryonic tissue| esophagus| eye| heart| intestine| kidney| liver| lung| mammary gland| mouth| muscle| nerve| ovary| pancreas| pharynx| pituitary gland| placenta| prostate| skin| spleen| stomach| testis| uterus|adrenal tumor| breast (mammary gland) tumor| chondrosarcoma| colorectal tumor| esophageal tumor| gastrointestina…	NA	NA	NA	NA	NM_000597	GO:0005576	extracellular region	inferred from sequence or structural similarity	NM_000597	GO:0005515	protein binding	inferred from physical interaction	NM_000597	GenMAPP	Smooth_muscle_contraction	ENST00000233809	Pfam	IPR000716	Thyroglobulin type-1	7.89137	7.27155
TC0200010801.hg.1	6.84484	7.95096	-2.15265	down	RQCD1	RCD1 required for cell differentiation1 homolog (S. pombe)	coding	chr2	+	NM_001271634	218568580	218597080	10	2q35	9125	NM_001271634	RefSeq	Homo sapiens RCD1 required for cell differentiation1 homolog (S. pombe) (RQCD1), transcript variant 1, mRNA.	chr2	100	100	0	NA	NM_001271634	Q92600	NM_001271634	Hs.148767	adrenal gland| ascites| blood| bone| brain| cervix| connective tissue| embryonic tissue| esophagus| eye| heart| intestine| kidney| liver| lung| lymph| lymph node| mammary gland| mouth| muscle| ovary| pancreas| pharynx| pituitary gland| placenta| prostate| skin| stomach| testis| thyroid| trachea| uterus| vascular| breast (mammary gland) tumor| cervical tumor| chondrosarcoma| colorectal tumor| esop…	NA	NA	NA	NA	NM_001271634	GO:0000932	cytoplasmic mRNA processing body	not recorded	NM_001271634	GO:0005515	protein binding	inferred from physical interaction	NA	NA	NA	OTTHUMT00000336920	Pfam	IPR007216	Rcd1/Caf40	6.84484	7.95096
TC0200010857.hg.1	3.45916	2.73204	1.65533	up	INHA	inhibin alpha	coding	chr2	+	NM_002191	219569162	219575713	10	2q35	3623	NM_002191	RefSeq	Homo sapiens inhibin, alpha (INHA), mRNA.	chr2	100	100	0	NA	NM_002191	P05111	NM_002191	Hs.407506	brain| eye| liver| lung| ovary| placenta| testis| thyroid| uterus| germ cell tumor| head and neck tumor| liver tumor| normal| ovarian tumor| primitive neuroectodermal tumor of the CNS| fetus| adult	NM_002191	GO:0001501	skeletal system development	traceable author statement	NM_002191	GO:0001750	photoreceptor outer segment	inferred from electronic annotation	NM_002191	GO:0005102	receptor binding	inferred from physical interaction	NM_002191	GenMAPP	Ovarian_Infertility_Genes	ENST00000243786	Pfam	IPR001839	Transforming growth factor-beta, C-terminal	3.45916	2.73204
TC0200010980.hg.1	3.34334	2.41073	1.90872	up	CCL20	chemokine (C-C motif) ligand 20	coding	chr2	+	NM_001130046	227813842	227817564	10	2q36.3	6364	NM_001130046	RefSeq	Homo sapiens chemokine (C-C motif) ligand 20 (CCL20), transcript variant 2, mRNA.	chr2	100	100	0	NA	NM_001130046	P78556	NM_001130046	Hs.75498	blood| brain| connective tissue| esophagus| eye| intestine| kidney| liver| lung| mouth| pancreas| pharynx| stomach| uterus| vascular| colorectal tumor| esophageal tumor| gastrointestinal tumor| head and neck tumor| liver tumor| normal| uterine tumor| fetus| juvenile| adult	NA	NA	NA	NA	NM_001130046	GO:0005576	extracellular region	traceable author statement	NM_001130046	GO:0005515	protein binding	inferred from physical interaction	NA	NA	NA	ENST00000358813	Pfam	IPR001811	Chemokine interleukin-8-like domain	3.34334	2.41073
TC0200010982.hg.1	4.28837	5.61712	-2.51185	down	DAW1	dynein assembly factor with WDR repeat domains 1	coding	chr2	+	NM_178821	227871054	227924344	10	2q36.3	164781	NM_178821	RefSeq	Homo sapiens dynein assembly factor with WDR repeat domains 1 (DAW1), mRNA.	chr2	100	100	0	NA	NM_178821	Q8N136	NM_178821	Hs.424594	brain| connective tissue| eye| heart| lung| pharynx| stomach| testis| vascular| gastrointestinal tumor| lung tumor| non-neoplasia| normal| fetus| adult	NA	NA	NA	NA	NM_178821	GO:0005929	cilium	inferred from electronic annotation	ENST00000309931	GO:0005515	protein binding	inferred from electronic annotation	NA	NA	NA	ENST00000309931	Pfam	IPR001680	WD40 repeat	4.28837	5.61712
TC0200011023.hg.1	3.91743	5.28206	-2.57511	down	SP100	SP100 nuclear antigen	coding	chr2	+	NM_001080391	230415942	230545602	10	2q37.1	6672	NM_001080391	RefSeq	Homo sapiens SP100 nuclear antigen (SP100), transcript variant 1, mRNA.	chr2	100	100	0	NA	NM_001080391	P23497	NA	NA	NA	NA	NA	NA	NA	NA	NA	NA	NA	NA	NA	NA	NA	NA	NA	NA	ENST00000264052	Pfam	IPR000770	SAND domain	3.91743	5.28206
TC0200011051.hg.1	5.99138	7.01492	-2.0329	down	PSMD1	proteasome 26S subunit, non-ATPase 1	coding	chr2	+	NM_001191037	231056864	231172827	10	2q37.1	5707	NM_001191037	RefSeq	Homo sapiens proteasome 26S subunit, non-ATPase 1 (PSMD1), transcript variant 2, mRNA.	chr2	100	100	0	NA	NM_001191037	Q99460	NM_001191037	Hs.3887	adrenal gland| ascites| bladder| blood| bone| bone marrow| brain| cervix| connective tissue| ear| embryonic tissue| esophagus| eye| heart| intestine| kidney| larynx| liver| lung| lymph| lymph node| mammary gland| mouth| muscle| ovary| pancreas| pharynx| pituitary gland| placenta| prostate| skin| spleen| stomach| testis| thymus| thyroid| tonsil| trachea| umbilical cord| uterus| vascular| breast (m…	NA	NA	NA	NA	NA	NA	NA	NA	NM_001191037	GO:0004175	endopeptidase activity	not recorded	NM_001191037	GenMAPP	Proteasome_Degradation	ENST00000308696	Pfam	IPR002015	Proteasome/cyclosome repeat	5.99138	7.01492
TC0200011188.hg.1	2.96205	3.60112	-1.55733	down	AGAP1	ArfGAP with GTPase domain, ankyrin repeat and PH domain 1	coding	chr2	+	NM_001037131	235494089	236131800	10	2q37	116987	NM_001037131	RefSeq	Homo sapiens ArfGAP with GTPase domain, ankyrin repeat and PH domain 1 (AGAP1), transcript variant 1, mRNA.	chr2	100	100	0	NA	NM_001037131	Q9UPQ3	NM_001037131	Hs.435039	adipose tissue| adrenal gland| ascites| blood| bone| brain| connective tissue| embryonic tissue| esophagus| eye| heart| intestine| kidney| liver| lung| mammary gland| muscle| nerve| pancreas| parathyroid| pharynx| placenta| prostate| skin| stomach| testis| thyroid| uterus| vascular|adrenal tumor| breast (mammary gland) tumor| chondrosarcoma| colorectal tumor| esophageal tumor| gastrointestinal tu…	NM_001037131	GO:0007264	small GTPase mediated signal transduction	inferred from electronic annotation	NM_001037131	GO:0005737	cytoplasm	inferred from electronic annotation	NM_001037131	GO:0005096	GTPase activator activity	inferred from electronic annotation	NA	NA	NA	ENST00000304032	Pfam	IPR001164	Arf GTPase activating protein	2.96205	3.60112
TC0200011219.hg.1	6.34206	4.7113	3.09678	up	ACKR3	atypical chemokine receptor 3	coding	chr2	+	NM_020311	236558365	236582358	10	2q37.3	57007	NM_020311	RefSeq	Homo sapiens atypical chemokine receptor 3 (ACKR3), mRNA.	chr2	100	100	0	NA	NM_020311	P25106	NM_020311	Hs.471751	bladder| bone| bone marrow| brain| connective tissue| embryonic tissue| esophagus| eye| heart| intestine| kidney| larynx| lung| lymph| mammary gland| muscle| nerve| ovary| pancreas| placenta| prostate| skin| stomach| testis| thymus| thyroid| trachea| umbilical cord| uterus| bladder carcinoma| breast (mammary gland) tumor| chondrosarcoma| colorectal tumor| esophageal tumor| gastrointestinal tumor|…	NM_020311	GO:0001525	angiogenesis	inferred from electronic annotation	NM_020311	GO:0005768	endosome	inferred from direct assay	NM_020311	GO:0005044	scavenger receptor activity	inferred from mutant phenotype	NM_020311	GenMAPP	GPCRDB_Class_A_Rhodopsin-like	ENST00000272928	Pfam	IPR000276	G protein-coupled receptor, rhodopsin-like	6.34206	4.7113
TC0200011386.hg.1	5.67448	6.48248	-1.75079	down	PPP1R7	protein phosphatase 1, regulatory subunit 7	coding	chr2	+	NM_001282409	241149573	241183652	10	2q37.3	5510	NM_001282409	RefSeq	Homo sapiens protein phosphatase 1, regulatory subunit 7 (PPP1R7), transcript variant 2, mRNA.	chr2	100	100	0	NA	NM_001282409	Q15435	NA	NA	NA	NM_001282409	GO:0007059	chromosome segregation	inferred from electronic annotation	NM_001282409	GO:0005634	nucleus	inferred from direct assay	NM_001282409	GO:0005515	protein binding	inferred from physical interaction	NA	NA	NA	ENST00000234038	Pfam	IPR025875	Leucine rich repeat 4	5.67448	6.48248
TC0200011421.hg.1	3.42228	4.05087	-1.54606	down	ING5	inhibitor of growth family member 5	coding	chr2	+	NM_032329	241702035	241729481	10	2q37.3	84289	NM_032329	RefSeq	Homo sapiens inhibitor of growth family, member 5 (ING5), mRNA.	chr2	100	100	0	NA	NM_032329	Q8WYH8	NM_032329	Hs.529172	adipose tissue| ascites| bone| bone marrow| brain| embryonic tissue| eye| heart| intestine| kidney| liver| lung| lymph| lymph node| mammary gland| mouth| muscle| ovary| pancreas| placenta| prostate| skin| stomach| testis| thymus| thyroid| uterus| breast (mammary gland) tumor| chondrosarcoma| gastrointestinal tumor| germ cell tumor| glioma| head and neck tumor| kidney tumor| leukemia| lymphoma| no…	NA	NA	NA	NA	NM_032329	GO:0005634	nucleus	inferred from direct assay	NM_032329	GO:0003682	chromatin binding	inferred from electronic annotation	NA	NA	NA	ENST00000313552	Pfam	IPR019787	Zinc finger, PHD-finger	3.42228	4.05087
TC0200011503.hg.1	6.17779	5.55756	1.53712	up	PXDN	peroxidasin	coding	chr2	-	NM_012293	1631887	1744852	10	2p25	7837	NM_012293	RefSeq	Homo sapiens peroxidasin (PXDN), mRNA.	chr2	100	100	0	NA	NM_012293	Q92626	NM_012293	Hs.332197	adipose tissue| bone| bone marrow| brain| cervix| connective tissue| ear| embryonic tissue| eye| heart| intestine| kidney| larynx| liver| lung| lymph node| mammary gland| mouth| muscle| ovary| pancreas| placenta| prostate| skin| spleen| stomach| testis| thymus| thyroid| trachea| umbilical cord| uterus| vascular| bladder carcinoma| breast (mammary gland) tumor| cervical tumor| chondrosarcoma| colo…	NM_012293	GO:0001960	negative regulation of cytokine-mediated signaling pathway	non-traceable author statement	NM_012293	GO:0005578	proteinaceous extracellular matrix	inferred from electronic annotation	NM_012293	GO:0004601	peroxidase activity	inferred from direct assay	NA	NA	NA	ENST00000252804	Pfam	IPR001007	VWFC domain	6.17779	5.55756
TC0200011686.hg.1	4.31987	5.09325	-1.70927	down	ITGB1BP1	integrin beta 1 binding protein 1	coding	chr2	-	NM_004763	9403475	9423547	10	2p25.2	9270	NM_004763	RefSeq	Homo sapiens integrin beta 1 binding protein 1 (ITGB1BP1), transcript variant 1, mRNA.	chr2	100	100	0	NA	NM_004763	O14713	NA	NA	NA	NA	NA	NA	NA	NA	NA	NA	NA	NA	NA	NA	NA	NA	NA	NA	ENST00000238091	Pfam	IPR019517	Integrin binding protein, ICAP-1	4.31987	5.09325
TC0200011726.hg.1	4.57787	5.20338	-1.54276	down	NOL10	nucleolar protein 10	coding	chr2	-	NM_001261392	10570766	10689987	10	2p25.1	79954	NM_001261392	RefSeq	Homo sapiens nucleolar protein 10 (NOL10), transcript variant 2, mRNA.	chr2	100	100	0	NA	NM_001261392	Q9BSC4	NM_001261392	Hs.222494	adrenal gland| ascites| bladder| blood| bone| bone marrow| brain| cervix| connective tissue| embryonic tissue| esophagus| eye| intestine| kidney| liver| lung| lymph node| mammary gland| mouth| muscle| ovary| pancreas| pharynx| pituitary gland| placenta| prostate| salivary gland| skin| spleen| stomach| testis| thymus| thyroid| uterus| vascular|adrenal tumor| breast (mammary gland) tumor| cervical …	NA	NA	NA	NA	NM_001261392	GO:0005730	nucleolus	inferred from direct assay	NM_001261392	GO:0044822	poly(A) RNA binding	inferred from direct assay	NA	NA	NA	ENST00000345985	Pfam	IPR012580	NUC153	4.57787	5.20338
TC0200011731.hg.1	7.65884	8.62114	-1.94842	down	PDIA6	protein disulfide isomerase family A, member 6	coding	chr2	-	NM_001282704	10783391	10837977	10	2p25.1	10130	NM_001282704	RefSeq	Homo sapiens protein disulfide isomerase family A, member 6 (PDIA6), transcript variant 1, mRNA.	chr2	100	100	0	NA	NM_001282704	Q15084	NM_001282704	Hs.212102	adipose tissue| adrenal gland| ascites| bladder| blood| bone| bone marrow| brain| cervix| connective tissue| ear| embryonic tissue| esophagus| eye| heart| intestine| kidney| larynx| liver| lung| lymph| lymph node| mammary gland| mouth| muscle| nerve| ovary| pancreas| parathyroid| pharynx| pituitary gland| placenta| prostate| salivary gland| skin| spleen| stomach| testis| thymus| thyroid| tonsil| …	NM_001282704	GO:0006457	protein folding	traceable author statement	NM_001282704	GO:0005783	endoplasmic reticulum	traceable author statement	NM_001282704	GO:0003756	protein disulfide isomerase activity	inferred from electronic annotation	NA	NA	NA	ENST00000272227	Pfam	IPR013766	Thioredoxin domain	7.65884	8.62114
TC0200011803.hg.1	3.84414	4.53629	-1.61569	down	NBAS	neuroblastoma amplified sequence	coding	chr2	-	NM_015909	15166908	15561348	10	2p24	51594	NM_015909	RefSeq	Homo sapiens neuroblastoma amplified sequence (NBAS), transcript variant 1, mRNA.	chr2	100	100	0	NA	NM_015909	A2RRP1	NM_015909	Hs.467759	bone| bone marrow| brain| cervix| connective tissue| ear| embryonic tissue| eye| heart| intestine| kidney| larynx| liver| lung| lymph node| mammary gland| mouth| muscle| ovary| pancreas| pharynx| pituitary gland| placenta| prostate| skin| spleen| stomach| testis| thyroid| umbilical cord| uterus| breast (mammary gland) tumor| cervical tumor| chondrosarcoma| colorectal tumor| gastrointestinal tumor…	NM_015909	GO:0000956	nuclear-transcribed mRNA catabolic process	inferred from mutant phenotype	NM_015909	GO:0005783	endoplasmic reticulum	inferred from direct assay	NM_015909	GO:0000149	SNARE binding	inferred from direct assay	NA	NA	NA	ENST00000281513	Pfam	IPR013244	Sec39 domain	3.84414	4.53629
TC0200011901.hg.1	5.27133	5.88799	-1.53332	down	PUM2	pumilio RNA binding family member 2	coding	chr2	-	NM_001282752	20248691	20352234	10	2p24.1	23369	NM_001282752	RefSeq	Homo sapiens pumilio RNA-binding family member 2 (PUM2), transcript variant 2, mRNA.	chr2	100	100	0	NA	NM_001282752	Q8TB72	NM_001282752	Hs.467824	adipose tissue| adrenal gland| ascites| bladder| blood| bone| bone marrow| brain| cervix| connective tissue| embryonic tissue| esophagus| eye| heart| intestine| kidney| larynx| liver| lung| lymph| lymph node| mammary gland| mouth| muscle| ovary| pancreas| pharynx| placenta| prostate| skin| stomach| testis| thymus| thyroid| trachea| uterus| vascular|adrenal tumor| bladder carcinoma| breast (mammar…	NM_001282752	GO:0006417	regulation of translation	inferred from electronic annotation	NM_001282752	GO:0005737	cytoplasm	inferred from direct assay	NM_001282752	GO:0003730	mRNA 3'-UTR binding	inferred from direct assay	NA	NA	NA	ENST00000319801	Pfam	IPR001313	Pumilio RNA-binding repeat	5.27133	5.88799
TC0200011980.hg.1	4.09139	4.77858	-1.61015	down	ITSN2	intersectin 2	coding	chr2	-	NM_006277	24202864	24360714	10	2p23.3	50618	NM_006277	RefSeq	Homo sapiens intersectin 2 (ITSN2), transcript variant 1, mRNA.	chr2	100	100	0	NA	NM_006277	Q9NZM3	NM_006277	Hs.432562	adrenal gland| bladder| blood| bone| bone marrow| brain| cervix| connective tissue| embryonic tissue| esophagus| eye| heart| intestine| kidney| liver| lung| lymph| lymph node| mammary gland| mouth| muscle| nerve| ovary| pancreas| pharynx| placenta| prostate| skin| spleen| stomach| testis| thymus| thyroid| trachea| uterus| vascular|adrenal tumor| bladder carcinoma| breast (mammary gland) tumor| ch…	NM_006277	GO:0006897	endocytosis	inferred from electronic annotation	NM_006277	GO:0005737	cytoplasm	inferred from electronic annotation	NM_006277	GO:0005070	SH3/SH2 adaptor activity	traceable author statement	NA	NA	NA	ENST00000355123	Pfam	IPR000008	C2 domain	4.09139	4.77858
TC0200011998.hg.1	5.38339	4.6433	1.67028	up	POMC	proopiomelanocortin	coding	chr2	-	NM_000939	25160853	25168903	10	2p23.3	5443	NM_000939	RefSeq	Homo sapiens proopiomelanocortin (POMC), transcript variant 2, mRNA.	chr2	100	100	0	NA	NM_000939	P01189	NM_000939	Hs.1897	brain| embryonic tissue| eye| intestine| lung| pituitary gland| placenta| testis| uterus| germ cell tumor| normal|embryoid body| fetus| adult	NM_000939	GO:0006091	generation of precursor metabolites and energy	inferred from mutant phenotype	NM_000939	GO:0005576	extracellular region	traceable author statement	NM_000939	GO:0001664	G-protein coupled receptor binding	inferred from direct assay	NA	NA	NA	ENST00000264708	Pfam	IPR013531	Pro-opiomelanocortin/corticotropin, ACTH, central region	5.38339	4.6433
TC0200012040.hg.1	1.40968	2.62313	-2.31891	down	CIB4	calcium and integrin binding family member 4	coding	chr2	-	NM_001029881	26581202	26641368	10	2p23.3	130106	NM_001029881	RefSeq	Homo sapiens calcium and integrin binding family member 4 (CIB4), mRNA.	chr2	100	100	0	NA	NM_001029881	A0PJX0	NM_001029881	Hs.591579	ascites| kidney| placenta| prostate| testis| gastrointestinal tumor| germ cell tumor| normal| adult	NA	NA	NA	NA	NA	NA	NA	NA	NM_001029881	GO:0000287	magnesium ion binding	inferred from direct assay	NA	NA	NA	ENST00000288861	Pfam	IPR011992	EF-hand domain pair	1.40968	2.62313
TC0200012073.hg.1	3.51007	4.18683	-1.59855	down	GTF3C2	general transcription factor IIIC subunit 2	coding	chr2	-	NM_001035521	27325849	27357034	10	2p23.3	2976	NM_001035521	RefSeq	Homo sapiens general transcription factor IIIC, polypeptide 2, beta 110kDa (GTF3C2), transcript variant 2, mRNA.	chr2	100	100	0	NA	NM_001035521	Q8WUA4	NM_001035521	Hs.75782	adrenal gland| ascites| bladder| blood| bone| bone marrow| brain| cervix| connective tissue| embryonic tissue| esophagus| eye| heart| intestine| kidney| larynx| liver| lung| lymph| lymph node| mammary gland| mouth| muscle| nerve| ovary| pancreas| parathyroid| pharynx| pituitary gland| placenta| prostate| skin| spleen| stomach| testis| thymus| thyroid| trachea| umbilical cord| uterus| vascular|adr…	NM_001035521	GO:0006351	transcription, DNA-templated	inferred from direct assay	NM_001035521	GO:0000127	transcription factor TFIIIC complex	inferred from direct assay	NM_001035521	GO:0003677	DNA binding	inferred from direct assay	NA	NA	NA	ENST00000264720	Pfam	IPR001680	WD40 repeat	3.51007	4.18683
TC0200012219.hg.1	5.5401	6.20302	-1.58328	down	FAM98A	family with sequence similarity 98, member A	coding	chr2	-	NM_001304538	33583658	33599382	10	2p22.3	25940	NM_001304538	RefSeq	Homo sapiens family with sequence similarity 98, member A (FAM98A), transcript variant 2, mRNA.	chr2	100	100	0	NA	NM_001304538	Q8NCA5	NM_001304538	Hs.468140	ascites| bladder| blood| bone| bone marrow| brain| connective tissue| embryonic tissue| eye| heart| intestine| kidney| larynx| liver| lung| lymph| lymph node| mammary gland| mouth| muscle| nerve| ovary| pancreas| parathyroid| pharynx| placenta| prostate| salivary gland| skin| spleen| testis| thymus| thyroid| trachea| uterus| vascular| bladder carcinoma| breast (mammary gland) tumor| chondrosarcom…	NA	NA	NA	NA	NM_001304538	GO:0072669	tRNA-splicing ligase complex	not recorded	NM_001304538	GO:0005515	protein binding	inferred from physical interaction	NA	NA	NA	ENST00000238823	Pfam	IPR018797	Uncharacterised protein family FAM98	5.5401	6.20302
TC0200012404.hg.1	5.41473	4.7661	1.56768	up	ZFP36L2	ZFP36 ring finger protein-like 2	coding	chr2	-	NM_006887	43222402	43226609	10	2p22.3-p21	678	NM_006887	RefSeq	Homo sapiens ZFP36 ring finger protein-like 2 (ZFP36L2), mRNA.	chr2	100	100	0	NA	NM_006887	P47974	NM_006887	Hs.503093	adipose tissue| adrenal gland| ascites| bladder| blood| bone| bone marrow| brain| cervix| connective tissue| ear| embryonic tissue| esophagus| eye| heart| intestine| kidney| larynx| liver| lung| lymph| lymph node| mammary gland| mouth| muscle| nerve| ovary| pancreas| parathyroid| pharynx| pituitary gland| placenta| prostate| skin| spleen| stomach| testis| thymus| thyroid| tonsil| umbilical cord| …	NM_006887	GO:0000288	nuclear-transcribed mRNA catabolic process, deadenylation-dependent decay	inferred from electronic annotation	NM_006887	GO:0005634	nucleus	inferred from sequence or structural similarity	NM_006887	GO:0003677	DNA binding	inferred from electronic annotation	NA	NA	NA	ENST00000282388	Pfam	IPR000571	Zinc finger, CCCH-type	5.41473	4.7661
TC0200012405.hg.1	2.09118	2.89251	-1.74271	down	THADA	thyroid adenoma associated	coding	chr2	-	NM_001083953	43230836	43596046	10	2p21	63892	NM_001083953	RefSeq	Homo sapiens thyroid adenoma associated (THADA), transcript variant 3, mRNA.	chr2	100	100	0	NA	NM_001083953	Q6YHU6	NA	NA	NA	NA	NA	NA	NA	ENST00000403856	GO:0016020	membrane	inferred from electronic annotation	NM_001083953	GO:0005515	protein binding	inferred from physical interaction	NA	NA	NA	ENST00000405006	Pfam	IPR019442	Domain of unknown function DUF2428, death-receptor-like	2.09118	2.89251
TC0200012559.hg.1	3.5795	4.34057	-1.69474	down	NRXN1	neurexin 1	coding	chr2	-	NM_001135659	49918505	51032561	10	2p16.3	9378	NM_001135659	RefSeq	Homo sapiens neurexin 1 (NRXN1), transcript variant alpha2, mRNA.	chr2	100	100	0	NA	NM_001135659	Q9ULB1	NM_001135659	Hs.637685	brain| connective tissue| ear| embryonic tissue| eye| intestine| kidney| liver| lung| muscle| nerve| pancreas| pharynx| pituitary gland| placenta| skin| testis| trachea| uterus| vascular| colorectal tumor| germ cell tumor| glioma| kidney tumor| lung tumor| non-neoplasia| normal| pancreatic tumor| primitive neuroectodermal tumor of the CNS| skin tumor| soft tissue/muscle tissue tumor|embryoid body…	NA	NA	NA	NA	NA	NA	NA	NA	NA	NA	NA	NA	NA	NA	NA	ENST00000342183	Pfam	IPR001791	Laminin G domain	3.5795	4.34057
TC0200012617.hg.1	1.51302	2.1033	-1.50554	down	TSPYL6	TSPY-like 6	coding	chr2	-	NM_001003937	54253178	54256272	10	2p16.2	388951	NM_001003937	RefSeq	Homo sapiens TSPY-like 6 (TSPYL6), mRNA.	chr2	100	100	0	NA	NM_001003937	Q8N831	NM_001003937	Hs.620508	ovary| testis| normal| ovarian tumor| fetus| adult	NM_001003937	GO:0006334	nucleosome assembly	inferred from electronic annotation	NM_001003937	GO:0005634	nucleus	inferred from electronic annotation	NA	NA	NA	NA	NA	NA	NA	ENST00000317802	Pfam	IPR002164	Nucleosome assembly protein (NAP)	1.51302	2.1033
TC0200012734.hg.1	3.02306	3.77164	-1.68013	down	USP34	ubiquitin specific peptidase 34	coding	chr2	-	NM_014709	61187455	61470769	10	2p15	9736	NA	NA	NA	NA	NA	NA	NA	NA	NM_014709	Q70CQ2	NA	NA	NA	NA	NA	NA	NA	NM_014709	GO:0005634	nucleus	not recorded	NA	NA	NA	NA	NA	NA	NA	ENST00000398571	Pfam	IPR001394	Peptidase C19, ubiquitin carboxyl-terminal hydrolase	3.02306	3.77164
TC0200012755.hg.1	7.7028	8.36845	-1.58628	down	CCT4	chaperonin containing TCP1, subunit 4 (delta)	coding	chr2	-	NM_001256721	61868089	61888804	10	2p15	10575	NM_001256721	RefSeq	Homo sapiens chaperonin containing TCP1, subunit 4 (delta) (CCT4), transcript variant 2, mRNA.	chr2	100	100	0	NA	NM_001256721	P50991	NM_001256721	Hs.421509	adipose tissue| adrenal gland| ascites| bladder| blood| bone| bone marrow| brain| cervix| connective tissue| ear| embryonic tissue| esophagus| eye| heart| intestine| kidney| larynx| liver| lung| lymph| lymph node| mammary gland| mouth| muscle| ovary| pancreas| parathyroid| pharynx| pituitary gland| placenta| prostate| salivary gland| skin| spleen| stomach| testis| thymus| thyroid| tonsil| trachea…	NM_001256721	GO:0006457	protein folding	traceable author statement	NM_001256721	GO:0002199	zona pellucida receptor complex	inferred from electronic annotation	NM_001256721	GO:0005515	protein binding	inferred from physical interaction	NA	NA	NA	ENST00000394440	Pfam	IPR002423	Chaperonin Cpn60/TCP-1 family	7.7028	8.36845
TC0200012804.hg.1	2.07697	2.70546	-1.54595	down	VPS54	vacuolar protein sorting 54 homolog (S. cerevisiae)	coding	chr2	-	NM_001005739	63892146	64019080	10	2p13-p14	51542	NM_001005739	RefSeq	Homo sapiens vacuolar protein sorting 54 homolog (S. cerevisiae) (VPS54), transcript variant 2, mRNA.	chr2	100	100	0	NA	NM_001005739	Q9P1Q0	NM_001005739	Hs.48499	adrenal gland| ascites| bladder| blood| bone| brain| connective tissue| embryonic tissue| esophagus| eye| intestine| kidney| larynx| liver| lung| lymph| lymph node| mammary gland| mouth| nerve| ovary| pancreas| pharynx| placenta| prostate| salivary gland| skin| spleen| stomach| testis| thymus| trachea| uterus| vascular|adrenal tumor| breast (mammary gland) tumor| chondrosarcoma| colorectal tumor|…	NM_001005739	GO:0006896	Golgi to vacuole transport	not recorded	NM_001005739	GO:0000938	GARP complex	inferred from direct assay	NM_001005739	GO:0005515	protein binding	inferred from physical interaction	NA	NA	NA	ENST00000272322	Pfam	IPR012501	Vps54-like	2.07697	2.70546
TC0200012854.hg.1	7.801	8.39332	-1.50767	down	RAB1A	RAB1A, member RAS oncogene family	coding	chr2	-	NM_004161	65070701	65130301	10	2p14	5861	NM_004161	RefSeq	Homo sapiens RAB1A, member RAS oncogene family (RAB1A), transcript variant 1, mRNA.	chr2	100	100	0	NA	NM_004161	P62820	NM_004161	Hs.310645	adipose tissue| adrenal gland| ascites| bladder| blood| bone| bone marrow| brain| cervix| connective tissue| ear| embryonic tissue| esophagus| eye| heart| intestine| kidney| larynx| liver| lung| lymph| lymph node| mammary gland| mouth| muscle| nerve| ovary| pancreas| parathyroid| pharynx| pituitary gland| placenta| prostate| salivary gland| skin| spleen| stomach| testis| thymus| thyroid| trachea|…	NA	NA	NA	NA	NM_004161	GO:0000139	Golgi membrane	not recorded	NM_004161	GO:0003924	GTPase activity	inferred from direct assay	NA	NA	NA	ENST00000398529	Pfam	IPR001806	Small GTPase superfamily	7.801	8.39332
TC0200012956.hg.1	5.62136	6.44068	-1.76457	down	GFPT1	glutamine--fructose-6-phosphate transaminase 1	coding	chr2	-	NM_001244710	69319769	69387254	10	2p13	2673	NM_001244710	RefSeq	Homo sapiens glutamine--fructose-6-phosphate transaminase 1 (GFPT1), transcript variant 1, mRNA.	chr2	100	100	0	NA	NM_001244710	Q06210	NM_001244710	Hs.580300	adipose tissue| adrenal gland| ascites| bladder| blood| bone| bone marrow| brain| cervix| connective tissue| embryonic tissue| esophagus| eye| intestine| kidney| larynx| liver| lung| lymph node| mammary gland| mouth| muscle| nerve| ovary| pancreas| parathyroid| pharynx| pituitary gland| placenta| prostate| salivary gland| skin| stomach| testis| thymus| thyroid| tonsil| trachea| uterus| vascular|a…	NM_001244710	GO:0006002	fructose 6-phosphate metabolic process	traceable author statement	NM_001244710	GO:0005829	cytosol	traceable author statement	NM_001244710	GO:0004360	glutamine-fructose-6-phosphate transaminase (isomerizing) activity	inferred from electronic annotation	NM_002056	HumanCyc	UDPNACETYLGALSYN-PWY	ENST00000357308	Pfam	IPR001347	Sugar isomerase (SIS)	5.62136	6.44068
TC0200013046.hg.1	3.25278	4.26868	-2.02218	down	EXOC6B	exocyst complex component 6B	coding	chr2	-	NM_015189	72175984	72826048	10	2p13.2	23233	NM_015189	RefSeq	Homo sapiens exocyst complex component 6B (EXOC6B), mRNA.	chr2	100	100	0	NA	NM_015189	Q9Y2D4	NM_015189	Hs.303454	ascites| bladder| bone| brain| connective tissue| embryonic tissue| esophagus| eye| heart| intestine| kidney| larynx| lung| mammary gland| mouth| muscle| nerve| pancreas| pharynx| pituitary gland| placenta| salivary gland| skin| spleen| stomach| testis| thyroid| trachea| uterus| vascular| bladder carcinoma| breast (mammary gland) tumor| chondrosarcoma| esophageal tumor| gastrointestinal tumor| ge…	NM_015189	GO:0006904	vesicle docking involved in exocytosis	inferred from electronic annotation	NM_015189	GO:0000145	exocyst	inferred from electronic annotation	NA	NA	NA	NA	NA	NA	NA	ENST00000272427	Pfam	IPR007225	Exocyst complex subunit Sec15-like	3.25278	4.26868
TC0200013095.hg.1	8.22045	7.52371	1.62084	up	BOLA3	bolA family member 3	coding	chr2	-	NM_001035505	74135398	74147994	10	2p13.1	388962	NM_001035505	RefSeq	Homo sapiens bolA family member 3 (BOLA3), transcript variant 2, mRNA.	chr2	100	100	0	NA	NM_001035505	Q53S33	NM_001035505	Hs.61472	ascites| blood| brain| connective tissue| embryonic tissue| eye| heart| intestine| kidney| liver| lung| mammary gland| mouth| muscle| ovary| prostate| skin| stomach| testis| uterus| vascular| breast (mammary gland) tumor| colorectal tumor| gastrointestinal tumor| germ cell tumor| glioma| leukemia| liver tumor| non-neoplasia| normal| prostate cancer| retinoblastoma| soft tissue/muscle tissue tumor…	NM_001035505	GO:0008150	biological_process	no biological data available	NM_001035505	GO:0005576	extracellular region	inferred from electronic annotation	NM_001035505	GO:0003674	molecular_function	no biological data available	NA	NA	NA	ENST00000327428	Pfam	IPR002634	BolA protein	8.22045	7.52371
TC0200013192.hg.1	2.2567	1.57662	1.60223	up	LRRTM1	leucine rich repeat transmembrane neuronal 1	coding	chr2	-	NM_178839	80288351	80304749	10	2p12	347730	NM_178839	RefSeq	Homo sapiens leucine rich repeat transmembrane neuronal 1 (LRRTM1), mRNA.	chr2	100	100	0	NA	NM_178839	Q86UE6	NM_178839	Hs.591580	brain| embryonic tissue| kidney| lung| pancreas| testis| thyroid| germ cell tumor| glioma| head and neck tumor| kidney tumor| normal| pancreatic tumor| primitive neuroectodermal tumor of the CNS| fetus| infant| adult	NM_178839	GO:0002091	negative regulation of receptor internalization	inferred from electronic annotation	NM_178839	GO:0005783	endoplasmic reticulum	inferred from direct assay	NM_178839	GO:0003674	molecular_function	no biological data available	NA	NA	NA	ENST00000295057	Pfam	IPR001611	Leucine-rich repeat	2.2567	1.57662
TC0200013283.hg.1	6.32085	5.57712	1.67451	up	TMEM150A	transmembrane protein 150A	coding	chr2	-	NM_001031738	85598547	85603196	10	2p11.2	129303	NM_001031738	RefSeq	Homo sapiens transmembrane protein 150A (TMEM150A), transcript variant 1, mRNA.	chr2	100	100	0	NA	NM_001031738	Q86TG1	NM_001031738	Hs.591559	adrenal gland| bladder| blood| bone| brain| connective tissue| embryonic tissue| eye| intestine| kidney| liver| lung| mammary gland| mouth| muscle| nerve| ovary| pancreas| pituitary gland| placenta| prostate| skin| spleen| stomach| testis| trachea| uterus| vascular| breast (mammary gland) tumor| chondrosarcoma| gastrointestinal tumor| germ cell tumor| glioma| head and neck tumor| kidney tumor| le…	NM_001031738	GO:0009056	catabolic process	inferred from electronic annotation	NM_001031738	GO:0005764	lysosome	not recorded	NM_001031738	GO:0005515	protein binding	inferred from physical interaction	NA	NA	NA	ENST00000306353	Pfam	IPR019402	Frag1/DRAM/Sfk1	6.32085	5.57712
TC0200013298.hg.1	3.2813	4.74313	-2.75457	down	ST3GAL5	ST3 beta-galactoside alpha-2,3-sialyltransferase 5	coding	chr2	-	NM_001042437	85839144	85889034	10	2p11.2	8869	NM_001042437	RefSeq	Homo sapiens ST3 beta-galactoside alpha-2,3-sialyltransferase 5 (ST3GAL5), transcript variant 2, mRNA.	chr2	100	100	0	NA	NM_001042437	Q9UNP4	NM_001042437	Hs.415117	adipose tissue| adrenal gland| blood| bone| bone marrow| brain| connective tissue| embryonic tissue| esophagus| eye| heart| intestine| kidney| liver| lung| lymph node| mammary gland| muscle| ovary| pancreas| parathyroid| pituitary gland| placenta| prostate| skin| spleen| stomach| testis| thymus| thyroid| trachea| uterus| vascular|adrenal tumor| breast (mammary gland) tumor| chondrosarcoma| esopha…	NA	NA	NA	NA	NM_001042437	GO:0000139	Golgi membrane	non-traceable author statement	NM_001042437	GO:0003836	beta-galactoside (CMP) alpha-2,3-sialyltransferase activity	not recorded	NA	NA	NA	ENST00000377332	Pfam	IPR001675	Glycosyl transferase family 29	3.2813	4.74313
TC0200013373.hg.1	2.82593	2.14821	1.5996	up	FOXI3	forkhead box I3	coding	chr2	-	NM_001135649	88446787	88452656	10	2p11.2	344167	NM_001135649	RefSeq	Homo sapiens forkhead box I3 (FOXI3), mRNA.	chr2	100	100	0	NA	NM_001135649	A8MTJ6	NM_001135649	Hs.716722	brain| eye| normal| fetus| infant	NM_001135649	GO:0006351	transcription, DNA-templated	inferred from electronic annotation	NM_001135649	GO:0005634	nucleus	inferred from electronic annotation	NM_001135649	GO:0003700	transcription factor activity, sequence-specific DNA binding	inferred from electronic annotation	NA	NA	NA	ENST00000428390	Pfam	IPR001766	Fork head domain	2.82593	2.14821
TC0200013511.hg.1	4.34804	5.12678	-1.71564	down	DUSP2	dual specificity phosphatase 2	coding	chr2	-	NM_004418	96143166	96145440	10	2q11	1844	NM_004418	RefSeq	Homo sapiens dual specificity phosphatase 2 (DUSP2), mRNA.	chr2	100	100	0	NA	NM_004418	Q05923	NM_004418	Hs.1183	blood| bone marrow| brain| cervix| connective tissue| embryonic tissue| eye| intestine| kidney| larynx| liver| lung| lymph| lymph node| mammary gland| nerve| ovary| pancreas| prostate| skin| spleen| testis| thymus| tonsil| uterus| breast (mammary gland) tumor| colorectal tumor| germ cell tumor| glioma| head and neck tumor| leukemia| lung tumor| lymphoma| non-neoplasia| normal| pancreatic tumor| p…	NM_004418	GO:0000188	inactivation of MAPK activity	traceable author statement	NM_004418	GO:0005634	nucleus	inferred from electronic annotation	NM_004418	GO:0004725	protein tyrosine phosphatase activity	inferred from electronic annotation	NA	NA	NA	ENST00000288943	Pfam	IPR000340	Dual specificity phosphatase, catalytic domain	4.34804	5.12678
TC0200013610.hg.1	2.80036	3.88925	-2.1271	down	REV1	REV1, DNA directed polymerase	coding	chr2	-	NM_001037872	99400475	99490035	10	2q11.1-q11.2	51455	NM_001037872	RefSeq	Homo sapiens REV1, polymerase (DNA directed) (REV1), transcript variant 2, mRNA.	chr2	100	100	0	NA	NM_001037872	Q9UBZ9	NM_001037872	Hs.443077	adipose tissue| adrenal gland| ascites| bladder| bone| brain| connective tissue| ear| embryonic tissue| eye| heart| intestine| kidney| liver| lung| lymph| lymph node| mammary gland| mouth| muscle| nerve| ovary| pancreas| placenta| prostate| skin| stomach| testis| thyroid| trachea| uterus| vascular| bladder carcinoma| breast (mammary gland) tumor| chondrosarcoma| colorectal tumor| gastrointestinal…	NA	NA	NA	NA	NM_001037872	GO:0005654	nucleoplasm	traceable author statement	NM_001037872	GO:0003684	damaged DNA binding	inferred from electronic annotation	NA	NA	NA	ENST00000258428	Pfam	IPR001126	UmuC domain	2.80036	3.88925
TC0200013836.hg.1	5.29447	6.1932	-1.86442	down	SEPT10	septin 10	coding	chr2	-	NM_144710	109542797	109614206	10	2q13	151011	NM_144710	RefSeq	Homo sapiens septin 10 (SEPT10), transcript variant 1, mRNA.	chr2	100	100	0	NA	NM_144710	Q9P0V9	NM_144710	Hs.469615	adrenal gland| bladder| blood| bone| brain| cervix| connective tissue| ear| embryonic tissue| esophagus| eye| heart| intestine| kidney| liver| lung| lymph node| mammary gland| mouth| nerve| ovary| pancreas| pharynx| placenta| prostate| salivary gland| skin| spleen| stomach| testis| thymus| trachea| uterus| vascular|adrenal tumor| breast (mammary gland) tumor| cervical tumor| chondrosarcoma| color…	NM_144710	GO:0007049	cell cycle	inferred from electronic annotation	NM_144710	GO:0005737	cytoplasm	inferred from electronic annotation	NM_144710	GO:0005515	protein binding	inferred from physical interaction	NA	NA	NA	ENST00000356688	Pfam	IPR030379	Septin-type guanine nucleotide-binding (G) domain	5.29447	6.1932
TC0200013878.hg.1	3.86842	4.75895	-1.85386	down	BUB1	BUB1 mitotic checkpoint serine/threonine kinase	coding	chr2	-	NM_001278616	110637698	110678114	10	2q14	699	NM_001278616	RefSeq	Homo sapiens BUB1 mitotic checkpoint serine/threonine kinase (BUB1), transcript variant 2, mRNA.	chr2	100	100	0	NA	NM_001278616	O43683	NM_001278616	Hs.469649	adrenal gland| ascites| bladder| blood| bone| bone marrow| brain| cervix| connective tissue| embryonic tissue| esophagus| eye| intestine| kidney| liver| lung| lymph| lymph node| mammary gland| mouth| muscle| ovary| pancreas| pharynx| placenta| prostate| skin| stomach| testis| thymus| trachea| uterus| vascular|adrenal tumor| bladder carcinoma| breast (mammary gland) tumor| cervical tumor| chondros…	NA	NA	NA	NA	NA	NA	NA	NA	NM_001278616	GO:0004672	protein kinase activity	traceable author statement	NM_001278616	GenMAPP	Cell_cycle_KEGG	ENST00000302759	Pfam	IPR000719	Protein kinase domain	3.86842	4.75895
TC0200013894.hg.1	4.8018	5.50376	-1.6267	down	ANAPC1	anaphase promoting complex subunit 1	coding	chr2	-	NM_022662	111766271	111884690	10	2q12.1	64682	NM_022662	RefSeq	Homo sapiens anaphase promoting complex subunit 1 (ANAPC1), mRNA.	chr2	100	100	0	NA	NM_022662	Q9H1A4	NM_022662	Hs.436527	adipose tissue| adrenal gland| ascites| bladder| blood| bone| brain| cervix| connective tissue| ear| embryonic tissue| intestine| kidney| liver| lung| lymph| lymph node| mammary gland| mouth| muscle| ovary| pancreas| placenta| prostate| salivary gland| skin| spleen| stomach| testis| thymus| thyroid| trachea| umbilical cord| uterus|adrenal tumor| breast (mammary gland) tumor| cervical tumor| chond…	NM_022662	GO:0000278	mitotic cell cycle	traceable author statement	NM_022662	GO:0005654	nucleoplasm	traceable author statement	ENST00000341068	GO:0005515	protein binding	inferred from electronic annotation	NM_022662	GenMAPP	Statin_Pathway_PharmGKB	ENST00000341068	Pfam	IPR024990	Anaphase-promoting complex subunit 1	4.8018	5.50376
TC0200013943.hg.1	4.19282	4.84819	-1.57503	down	SLC35F5	solute carrier family 35, member F5	coding	chr2	-	NM_025181	113705011	113756823	10	2q14.1	80255	NM_025181	RefSeq	Homo sapiens solute carrier family 35, member F5 (SLC35F5), transcript variant 1, mRNA.	chr2	100	100	0	NA	NM_025181	Q8WV83	NM_025181	Hs.632527	adrenal gland| ascites| bladder| blood| bone| bone marrow| brain| cervix| connective tissue| ear| embryonic tissue| esophagus| eye| heart| intestine| kidney| liver| lung| lymph| lymph node| mammary gland| mouth| muscle| ovary| pancreas| parathyroid| placenta| prostate| skin| spleen| testis| thymus| thyroid| trachea| uterus| vascular|adrenal tumor| bladder carcinoma| breast (mammary gland) tumor| …	NM_025181	GO:0006810	transport	inferred from electronic annotation	NM_025181	GO:0016021	integral component of membrane	inferred from electronic annotation	NA	NA	NA	NA	NA	NA	NA	ENST00000245680	Pfam	IPR000620	EamA domain	4.19282	4.84819
TC0200014029.hg.1	6.45712	5.45769	1.9992	up	C2orf76	chromosome 2 open reading frame 76	coding	chr2	-	NM_001017927	119302225	119366828	10	2q14.2	130355	NM_001017927	RefSeq	Homo sapiens chromosome 2 open reading frame 76 (C2orf76), mRNA.	chr2	100	100	0	NA	NM_001017927	Q3KRA6	NM_001017927	Hs.99488	bone marrow| brain| connective tissue| embryonic tissue| eye| heart| kidney| liver| lung| lymph node| mouth| muscle| ovary| pancreas| parathyroid| placenta| prostate| skin| testis| thymus| uterus| germ cell tumor| leukemia| lymphoma| normal| ovarian tumor| prostate cancer| skin tumor| soft tissue/muscle tissue tumor|embryoid body| blastocyst| fetus| adult	NA	NA	NA	NA	NA	NA	NA	NA	NA	NA	NA	NA	NA	NA	NA	ENST00000334816	Pfam	IPR018794	Uncharacterised protein family UPF0538	6.45712	5.45769
TC0200014091.hg.1	2.35058	3.02878	-1.60014	down	CLASP1	cytoplasmic linker associated protein 1	coding	chr2	-	NM_001142273	121337776	121649587	10	2q14.2-q14.3	23332	NM_001142273	RefSeq	Homo sapiens cytoplasmic linker associated protein 1 (CLASP1), transcript variant 2, mRNA.	chr2	100	100	0	NA	NM_001142273	Q7Z460	NM_001142273	Hs.469840	adrenal gland| ascites| bladder| blood| bone| brain| connective tissue| embryonic tissue| eye| heart| intestine| kidney| larynx| liver| lung| lymph node| mammary gland| mouth| muscle| pancreas| placenta| prostate| skin| spleen| stomach| testis| thymus| thyroid| uterus| bladder carcinoma| breast (mammary gland) tumor| chondrosarcoma| colorectal tumor| gastrointestinal tumor| germ cell tumor| gliom…	NA	NA	NA	NA	NA	NA	NA	NA	NM_001142273	GO:0002162	dystroglycan binding	inferred from physical interaction	NA	NA	NA	ENST00000263710	Pfam	IPR024395	CLASP N-terminal domain	2.35058	3.02878
TC0200014167.hg.1	4.86306	6.49782	-3.10537	down	ERCC3	excision repair cross-complementation group 3	coding	chr2	-	NM_000122	127257290	127294176	10	2q21	2071	NM_000122	RefSeq	Homo sapiens excision repair cross-complementation group 3 (ERCC3), transcript variant 1, mRNA.	chr2	100	100	0	NA	NM_000122	P19447	NM_000122	Hs.469872	adipose tissue| adrenal gland| ascites| bladder| blood| bone| bone marrow| brain| cervix| connective tissue| embryonic tissue| esophagus| eye| heart| intestine| kidney| larynx| liver| lung| lymph node| mammary gland| mouth| muscle| nerve| ovary| pancreas| pharynx| pituitary gland| placenta| prostate| salivary gland| skin| spleen| stomach| testis| thymus| thyroid| tonsil| trachea| umbilical cord| …	NA	NA	NA	NA	NM_000122	GO:0000439	core TFIIH complex	inferred from electronic annotation	NA	NA	NA	NA	NM_000122	GenMAPP	RNA_transcription_Reactome	ENST00000285398	Pfam	IPR001650	Helicase, C-terminal	4.86306	6.49782
TC0200014189.hg.1	4.81697	5.40559	-1.5038	down	POLR2D	polymerase (RNA) II (DNA directed) polypeptide D	coding	chr2	-	NM_004805	127843551	127858157	10	2q21	5433	NM_004805	RefSeq	Homo sapiens polymerase (RNA) II (DNA directed) polypeptide D (POLR2D), mRNA.	chr2	100	100	0	NA	NM_004805	O15514	NM_004805	Hs.715348	adrenal gland| bladder| blood| bone| brain| cervix| connective tissue| embryonic tissue| esophagus| eye| heart| intestine| kidney| larynx| liver| lung| lymph| lymph node| mammary gland| muscle| ovary| pancreas| parathyroid| placenta| prostate| salivary gland| skin| spleen| stomach| testis| thyroid| tonsil| uterus| vascular|adrenal tumor| bladder carcinoma| breast (mammary gland) tumor| cervical t…	NA	NA	NA	NA	NM_004805	GO:0000932	cytoplasmic mRNA processing body	not recorded	NM_004805	GO:0000166	nucleotide binding	inferred from electronic annotation	NA	NA	NA	ENST00000272645	Pfam	IPR005574	RNA polymerase II, Rpb4	4.81697	5.40559
TC0200014404.hg.1	2.50005	4.40122	-3.73516	down	MCM6	minichromosome maintenance complex component 6	coding	chr2	-	NM_005915	135839626	135876477	10	2q21	4175	NM_005915	RefSeq	Homo sapiens minichromosome maintenance complex component 6 (MCM6), mRNA.	chr2	100	100	0	NA	NM_005915	Q14566	NM_005915	Hs.444118	adipose tissue| ascites| bladder| blood| bone| bone marrow| brain| cervix| connective tissue| ear| embryonic tissue| esophagus| eye| heart| intestine| kidney| larynx| liver| lung| lymph| lymph node| mammary gland| mouth| muscle| nerve| ovary| pancreas| parathyroid| pharynx| pituitary gland| placenta| prostate| salivary gland| skin| spleen| stomach| testis| thymus| thyroid| tonsil| trachea| uterus…	NM_005915	GO:0000082	G1/S transition of mitotic cell cycle	traceable author statement	NM_005915	GO:0000784	nuclear chromosome, telomeric region	inferred from direct assay	NM_005915	GO:0003697	single-stranded DNA binding	inferred from electronic annotation	NM_005915	GenMAPP	Cell_cycle_KEGG	ENST00000264156	Pfam	IPR001208	MCM domain	2.50005	4.40122
TC0200014717.hg.1	1.8177	2.46029	-1.56113	down	WDSUB1	WD repeat, sterile alpha motif and U-box domain containing 1	coding	chr2	-	NM_001128212	159235793	159286799	10	2q24.2	151525	NM_001128212	RefSeq	Homo sapiens WD repeat, sterile alpha motif and U-box domain containing 1 (WDSUB1), transcript variant 2, mRNA.	chr2	100	100	0	NA	NM_001128212	Q8N9V3	NM_001128212	Hs.20848	adrenal gland| brain| connective tissue| embryonic tissue| eye| intestine| kidney| liver| lung| ovary| pancreas| pituitary gland| placenta| prostate| skin| spleen| testis| uterus| vascular| germ cell tumor| head and neck tumor| kidney tumor| leukemia| normal| ovarian tumor| pancreatic tumor| prostate cancer| skin tumor| soft tissue/muscle tissue tumor| uterine tumor|embryoid body| blastocyst| fet…	NM_001128212	GO:0016567	protein ubiquitination	inferred from electronic annotation	NA	NA	NA	NA	NM_001128212	GO:0004842	ubiquitin-protein transferase activity	inferred from electronic annotation	NA	NA	NA	ENST00000358147	Pfam	IPR001660	Sterile alpha motif domain	1.8177	2.46029
TC0200014735.hg.1	3.92057	3.28209	1.55669	up	RBMS1	RNA binding motif, single stranded interacting protein 1	coding	chr2	-	NM_002897	160272151	160493807	10	2q24.2	5937	NM_002897	RefSeq	Homo sapiens RNA binding motif, single stranded interacting protein 1 (RBMS1), transcript variant 3, mRNA.	chr2	100	100	0	NA	NM_002897	P29558	NM_002897	Hs.470412	adipose tissue| adrenal gland| bladder| blood| bone| bone marrow| brain| cervix| connective tissue| ear| embryonic tissue| esophagus| eye| heart| intestine| kidney| larynx| liver| lung| lymph node| mammary gland| mouth| muscle| ovary| pancreas| parathyroid| placenta| prostate| salivary gland| skin| spleen| stomach| testis| thymus| thyroid| tonsil| uterus| vascular| bladder carcinoma| breast (mamm…	NM_002897	GO:0006260	DNA replication	non-traceable author statement	NM_002897	GO:0005634	nucleus	non-traceable author statement	NM_002897	GO:0000166	nucleotide binding	inferred from electronic annotation	NA	NA	NA	ENST00000348849	Pfam	IPR000504	RNA recognition motif domain	3.92057	3.28209
TC0200014790.hg.1	3.42712	4.70641	-2.42719	down	GRB14	growth factor receptor bound protein 14	coding	chr2	-	NM_001303422	164492406	164621850	10	2q22-q24	2888	NM_001303422	RefSeq	Homo sapiens growth factor receptor-bound protein 14 (GRB14), transcript variant 2, mRNA.	chr2	100	100	0	NA	NM_001303422	Q14449	NM_001303422	Hs.411881	bladder| brain| connective tissue| embryonic tissue| eye| heart| intestine| kidney| liver| lung| mammary gland| pancreas| placenta| skin| stomach| testis| uterus| vascular| breast (mammary gland) tumor| colorectal tumor| gastrointestinal tumor| germ cell tumor| liver tumor| normal| skin tumor| soft tissue/muscle tissue tumor| uterine tumor| blastocyst| fetus| adult	NM_001303422	GO:0007165	signal transduction	inferred from electronic annotation	NM_001303422	GO:0000139	Golgi membrane	inferred from electronic annotation	NM_001303422	GO:0005070	SH3/SH2 adaptor activity	inferred from electronic annotation	NA	NA	NA	ENST00000263915	Pfam	IPR000159	Ras-associating (RA) domain	3.42712	4.70641
TC0200014792.hg.1	2.86676	3.55105	-1.6069	down	COBLL1	cordon-bleu WH2 repeat protein like 1	coding	chr2	-	NM_001278458	164653331	164843679	10	2q24.3	22837	NM_001278458	RefSeq	Homo sapiens cordon-bleu WH2 repeat protein-like 1 (COBLL1), transcript variant 1, mRNA.	chr2	100	100	0	NA	NM_001278458	Q53SF7	NA	NA	NA	NM_001278458	GO:0030041	actin filament polymerization	not recorded	NM_001278458	GO:0070062	extracellular exosome	inferred from direct assay	NM_001278458	GO:0003785	actin monomer binding	not recorded	NA	NA	NA	ENST00000342193	Pfam	IPR019025	Cordon-bleu, ubiquitin-like domain	2.86676	3.55105
TC0200014848.hg.1	1.60377	2.50204	-1.86383	down	ABCB11	ATP binding cassette subfamily B member 11	coding	chr2	-	NM_003742	168922938	169031323	10	2q24	8647	NM_003742	RefSeq	Homo sapiens ATP-binding cassette, sub-family B (MDR/TAP), member 11 (ABCB11), mRNA.	chr2	100	100	0	NA	NM_003742	O95342	NM_003742	Hs.658439	liver| lung| testis| trachea| liver tumor| lung tumor| normal| fetus| adult	NM_003742	GO:0006699	bile acid biosynthetic process	traceable author statement	NM_003742	GO:0005886	plasma membrane	traceable author statement	NM_003742	GO:0005215	transporter activity	traceable author statement	NA	NA	NA	ENST00000263817	Pfam	IPR003439	ABC transporter-like	1.60377	2.50204
TC0200014870.hg.1	8.46209	7.82458	1.55565	up	METTL5	methyltransferase like 5	coding	chr2	-	NM_001293186	169810081	169824931	10	2q31.1	29081	NM_001293186	RefSeq	Homo sapiens methyltransferase like 5 (METTL5), transcript variant 2, mRNA.	chr2	100	100	0	NA	NM_001293186	Q9NRN9	NM_001293186	Hs.470553	ascites| bladder| blood| bone| bone marrow| brain| connective tissue| embryonic tissue| eye| heart| intestine| kidney| larynx| liver| lung| lymph node| mammary gland| muscle| nerve| ovary| pancreas| pharynx| pituitary gland| placenta| prostate| salivary gland| skin| stomach| testis| uterus| vascular| bladder carcinoma| breast (mammary gland) tumor| chondrosarcoma| colorectal tumor| gastrointestin…	NM_001293186	GO:0032259	methylation	inferred from electronic annotation	NA	NA	NA	NA	NM_001293186	GO:0003676	nucleic acid binding	inferred from electronic annotation	NA	NA	NA	ENST00000260953	Pfam	IPR007848	Methyltransferase small domain	8.46209	7.82458
TC0200015072.hg.1	3.77318	2.68667	2.12359	up	TTC30A	tetratricopeptide repeat domain 30A	coding	chr2	-	NM_152275	177612992	177618966	10	2q31.2	92104	NM_152275	RefSeq	Homo sapiens tetratricopeptide repeat domain 30A (TTC30A), mRNA.	chr2	100	100	0	NA	NM_152275	Q86WT1	NM_152275	Hs.128384	adrenal gland| bladder| bone marrow| brain| cervix| connective tissue| ear| embryonic tissue| eye| intestine| kidney| larynx| lung| lymph| lymph node| mammary gland| mouth| muscle| prostate| skin| spleen| testis| thymus| trachea| uterus| vascular|adrenal tumor| bladder carcinoma| breast (mammary gland) tumor| cervical tumor| chondrosarcoma| colorectal tumor| germ cell tumor| glioma| head and neck…	NM_152275	GO:0042073	intraciliary transport	not recorded	NM_152275	GO:0005929	cilium	not recorded	ENST00000355689	GO:0005515	protein binding	inferred from electronic annotation	NA	NA	NA	ENST00000355689	Pfam	IPR013105	Tetratricopeptide repeat 2	3.77318	2.68667
TC0200015087.hg.1	2.85444	3.56428	-1.63563	down	SESTD1	SEC14 and spectrin domains 1	coding	chr2	-	NM_178123	179101692	179264790	10	2q31.2	91404	NM_178123	RefSeq	Homo sapiens SEC14 and spectrin domains 1 (SESTD1), mRNA.	chr2	100	100	0	NA	NM_178123	Q86VW0	NM_178123	Hs.30977	adipose tissue| adrenal gland| bladder| blood| bone| brain| cervix| connective tissue| ear| embryonic tissue| eye| heart| intestine| kidney| liver| lung| lymph node| mammary gland| mouth| muscle| nerve| ovary| pancreas| parathyroid| pharynx| placenta| prostate| skin| testis| tonsil| trachea| uterus| vascular|adrenal tumor| breast (mammary gland) tumor| cervical tumor| chondrosarcoma| colorectal t…	NA	NA	NA	NA	NM_178123	GO:0034704	calcium channel complex	inferred from physical interaction	NM_178123	GO:0001786	phosphatidylserine binding	inferred from direct assay	NA	NA	NA	ENST00000428443	Pfam	IPR001251	CRAL-TRIO lipid binding domain	2.85444	3.56428
TC0200015193.hg.1	7.3	6.31657	1.97716	up	CALCRL	calcitonin receptor like receptor	coding	chr2	-	NM_001271751	187341963	187448460	10	2q32.1	10203	NM_001271751	RefSeq	Homo sapiens calcitonin receptor-like (CALCRL), transcript variant 2, mRNA.	chr2	100	100	0	NA	NM_001271751	Q16602	NM_001271751	Hs.470882	adipose tissue| bone| brain| connective tissue| ear| embryonic tissue| esophagus| eye| heart| intestine| kidney| liver| lung| lymph node| mammary gland| mouth| muscle| nerve| placenta| prostate| skin| spleen| stomach| testis| thymus| trachea| umbilical cord| uterus| vascular| chondrosarcoma| colorectal tumor| esophageal tumor| gastrointestinal tumor| germ cell tumor| head and neck tumor| kidney t…	NA	NA	NA	NA	NM_001271751	GO:0005764	lysosome	inferred from direct assay	NM_001271751	GO:0001605	adrenomedullin receptor activity	inferred from direct assay	NM_001271751	GenMAPP	GPCRDB_Class_B_Secretin-like	ENST00000392370	Pfam	IPR000832	GPCR, family 2, secretin-like	7.3	6.31657
TC0200015314.hg.1	2.76875	3.61523	-1.7981	down	STK17B	serine/threonine kinase 17b	coding	chr2	-	NM_004226	196133566	196176503	10	2q32.3	9262	NM_004226	RefSeq	Homo sapiens serine/threonine kinase 17b (STK17B), mRNA.	chr2	100	100	0	NA	NM_004226	O94768	NM_004226	Hs.88297	ascites| blood| bone| bone marrow| brain| connective tissue| embryonic tissue| esophagus| eye| intestine| kidney| liver| lung| lymph| lymph node| mammary gland| mouth| muscle| ovary| pancreas| pharynx| pituitary gland| placenta| prostate| skin| spleen| stomach| testis| thymus| tonsil| trachea| uterus| vascular| breast (mammary gland) tumor| chondrosarcoma| colorectal tumor| esophageal tumor| gast…	NM_004226	GO:0006468	protein phosphorylation	inferred from direct assay	NM_004226	GO:0005634	nucleus	inferred from direct assay	NM_004226	GO:0004672	protein kinase activity	inferred from sequence or structural similarity	NA	NA	NA	ENST00000263955	Pfam	IPR000719	Protein kinase domain	2.76875	3.61523
TC0200015377.hg.1	3.30877	3.91413	-1.52136	down	TYW5	tRNA-yW synthesizing protein 5	coding	chr2	-	NM_001039693	199928911	199955736	10	2q33.1	129450	NM_001039693	RefSeq	Homo sapiens tRNA-yW synthesizing protein 5 (TYW5), transcript variant 1, mRNA.	chr2	100	100	0	NA	NM_001039693	A2RUC4	NM_001039693	Hs.204619	adrenal gland| blood| bone| brain| cervix| ear| embryonic tissue| eye| intestine| kidney| liver| lung| mammary gland| mouth| muscle| ovary| placenta| prostate| skin| spleen| testis| thymus| thyroid| trachea| uterus| breast (mammary gland) tumor| cervical tumor| chondrosarcoma| colorectal tumor| germ cell tumor| glioma| head and neck tumor| kidney tumor| normal| ovarian tumor| primitive neuroectod…	NM_001039693	GO:0006400	tRNA modification	traceable author statement	NM_001039693	GO:0005737	cytoplasm	traceable author statement	NM_001039693	GO:0000049	tRNA binding	inferred from direct assay	NA	NA	NA	OTTHUMT00000256144	Pfam	IPR003347	JmjC domain	3.30877	3.91413
TC0200015434.hg.1	3.4877	4.57471	-2.12434	down	ALS2	ALS2, alsin Rho guanine nucleotide exchange factor	coding	chr2	-	NM_001135745	201700263	201781189	10	2q33.1	57679	NM_001135745	RefSeq	Homo sapiens amyotrophic lateral sclerosis 2 (juvenile) (ALS2), transcript variant 2, mRNA.	chr2	100	100	0	NA	NM_001135745	Q96Q42	NM_001135745	Hs.471096	adrenal gland| blood| bone| brain| cervix| connective tissue| embryonic tissue| esophagus| eye| heart| intestine| kidney| liver| lung| lymph node| mammary gland| mouth| muscle| pancreas| pharynx| placenta| prostate| skin| stomach| testis| trachea| uterus| vascular|adrenal tumor| breast (mammary gland) tumor| cervical tumor| chondrosarcoma| colorectal tumor| esophageal tumor| gastrointestinal tumo…	NA	NA	NA	NA	NA	NA	NA	NA	NA	NA	NA	NA	NA	NA	NA	ENST00000264276	Pfam	IPR000219	Dbl homology (DH) domain	3.4877	4.57471
TC0200015538.hg.1	4.83327	5.52901	-1.6197	down	KLF7	Kruppel-like factor 7 (ubiquitous)	coding	chr2	-	NM_001270942	207074137	207167267	10	2q32	8609	NM_001270942	RefSeq	Homo sapiens Kruppel-like factor 7 (ubiquitous) (KLF7), transcript variant 2, mRNA.	chr2	100	100	0	NA	NM_001270942	O75840	NM_001270942	Hs.59908	adipose tissue| bladder| blood| bone| bone marrow| brain| cervix| connective tissue| embryonic tissue| eye| intestine| kidney| larynx| liver| lung| mammary gland| mouth| muscle| nerve| ovary| pancreas| placenta| prostate| skin| testis| thymus| trachea| umbilical cord| uterus| vascular| bladder carcinoma| breast (mammary gland) tumor| cervical tumor| chondrosarcoma| colorectal tumor| germ cell tum…	NM_001270942	GO:0006351	transcription, DNA-templated	inferred from electronic annotation	NM_001270942	GO:0005634	nucleus	inferred from electronic annotation	NM_001270942	GO:0003677	DNA binding	inferred from electronic annotation	NA	NA	NA	OTTHUMT00000256466	Pfam	IPR007087	Zinc finger, C2H2	4.83327	5.52901
TC0200015578.hg.1	5.20701	5.85754	-1.56975	down	IDH1	isocitrate dehydrogenase 1 (NADP+)	coding	chr2	-	NM_001282386	208236227	208266074	10	2q33.3	3417	NM_001282386	RefSeq	Homo sapiens isocitrate dehydrogenase 1 (NADP+), soluble (IDH1), transcript variant 2, mRNA.	chr2	100	100	0	NA	NM_001282386	O75874	NM_001282386	Hs.593422	adipose tissue| adrenal gland| ascites| bladder| blood| bone| bone marrow| brain| cervix| connective tissue| embryonic tissue| esophagus| eye| heart| intestine| kidney| larynx| liver| lung| lymph| lymph node| mammary gland| mouth| muscle| nerve| ovary| pancreas| pharynx| pituitary gland| placenta| prostate| skin| spleen| stomach| testis| thymus| trachea| umbilical cord| uterus| vascular| bladder …	NA	NA	NA	NA	NM_001282386	GO:0005737	cytoplasm	inferred from direct assay	NM_001282386	GO:0000287	magnesium ion binding	inferred from direct assay	NM_005896	HumanCyc	FERMENTATION-PWY	ENST00000345146	Pfam	IPR024084	Isopropylmalate dehydrogenase-like domain	5.20701	5.85754
TC0200015608.hg.1	3.33354	4.37423	-2.05722	down	LANCL1	LanC lantibiotic synthetase component C-like 1 (bacterial)	coding	chr2	-	NM_001136574	210431249	210477652	10	2q34	10314	NM_001136574	RefSeq	Homo sapiens LanC lantibiotic synthetase component C-like 1 (bacterial) (LANCL1), transcript variant 2, mRNA.	chr2	100	100	0	NA	NM_001136574	O43813	NM_001136574	Hs.13351	adipose tissue| adrenal gland| ascites| bladder| blood| bone| bone marrow| brain| cervix| connective tissue| ear| embryonic tissue| esophagus| eye| heart| intestine| kidney| liver| lung| lymph| lymph node| mammary gland| mouth| muscle| nerve| ovary| pancreas| parathyroid| pharynx| pituitary gland| placenta| prostate| skin| spleen| stomach| testis| thymus| thyroid| trachea| uterus| vascular|adrena…	NM_001136574	GO:0007186	G-protein coupled receptor signaling pathway	inferred from direct assay	NM_001136574	GO:0005634	nucleus	inferred from electronic annotation	NM_001136574	GO:0003824	catalytic activity	inferred from electronic annotation	NA	NA	NA	ENST00000233714	Pfam	IPR007822	Lanthionine synthetase C-like	3.33354	4.37423
TC0200015631.hg.1	2.18151	1.49826	1.60576	up	IKZF2	IKAROS family zinc finger 2	coding	chr2	-	NM_001079526	212999686	213152427	10	2q34	22807	NM_001079526	RefSeq	Homo sapiens IKAROS family zinc finger 2 (Helios) (IKZF2), transcript variant 2, mRNA.	chr2	100	100	0	NA	NM_001079526	Q9UKS7	NM_001079526	Hs.604950	bladder| blood| brain| connective tissue| embryonic tissue| eye| heart| kidney| lung| lymph node| mouth| muscle| pancreas| pharynx| placenta| prostate| spleen| testis| thymus| thyroid| trachea| uterus| bladder carcinoma| germ cell tumor| head and neck tumor| leukemia| non-neoplasia| normal| primitive neuroectodermal tumor of the CNS| prostate cancer| soft tissue/muscle tissue tumor| uterine tumor…	NM_001079526	GO:0006351	transcription, DNA-templated	inferred from electronic annotation	NM_001079526	GO:0005654	nucleoplasm	not recorded	NM_001079526	GO:0003700	transcription factor activity, sequence-specific DNA binding	not recorded	NA	NA	NA	OTTHUMT00000256593	Pfam	IPR007087	Zinc finger, C2H2	2.18151	1.49826
TC0200015815.hg.1	3.22274	2.31405	1.87734	up	EPHA4	EPH receptor A4	coding	chr2	-	NM_001304536	221418027	221574202	10	2q36.1	2043	NM_001304536	RefSeq	Homo sapiens EPH receptor A4 (EPHA4), transcript variant 1, mRNA.	chr2	100	100	0	NA	NM_001304536	P54764	NM_001304536	Hs.371218	adrenal gland| blood| bone| brain| connective tissue| embryonic tissue| esophagus| eye| heart| intestine| kidney| larynx| lung| mammary gland| mouth| muscle| ovary| pancreas| pituitary gland| placenta| prostate| skin| spleen| testis| thymus| thyroid| trachea| uterus| vascular| breast (mammary gland) tumor| chondrosarcoma| esophageal tumor| germ cell tumor| glioma| head and neck tumor| kidney tumo…	NA	NA	NA	NA	NA	NA	NA	NA	NA	NA	NA	NA	NA	NA	NA	ENST00000281821	Pfam	IPR001090	Ephrin receptor ligand binding domain	3.22274	2.31405
TC0200015885.hg.1	5.39764	4.79176	1.52191	up	FAM124B	family with sequence similarity 124 member B	coding	chr2	-	NM_001122779	224378698	224402085	10	2q36.2	79843	NM_001122779	RefSeq	Homo sapiens family with sequence similarity 124B (FAM124B), transcript variant 1, mRNA.	chr2	100	100	0	NA	NM_001122779	Q9H5Z6	NM_001122779	Hs.147585	bone marrow| brain| mouth| muscle| pharynx| placenta| skin| umbilical cord| vascular| leukemia| normal| fetus| neonate| adult	NA	NA	NA	NA	NA	NA	NA	NA	NM_001122779	GO:0005515	protein binding	inferred from physical interaction	NA	NA	NA	ENST00000243806	Pfam	IPR029380	FAM124	5.39764	4.79176
TC0200015887.hg.1	5.13034	5.81139	-1.60331	down	CUL3	cullin 3	coding	chr2	-	NM_001257197	224470150	224585397	10	2q36.2	8452	NM_001257197	RefSeq	Homo sapiens cullin 3 (CUL3), transcript variant 2, mRNA.	chr2	100	100	0	NA	NM_001257197	Q13618	NM_001257197	Hs.372286	adrenal gland| ascites| bladder| blood| bone| bone marrow| brain| cervix| connective tissue| embryonic tissue| esophagus| eye| heart| intestine| kidney| liver| lung| lymph node| mammary gland| mouth| muscle| ovary| pancreas| parathyroid| pharynx| pituitary gland| placenta| prostate| skin| spleen| stomach| testis| thymus| thyroid| trachea| uterus| vascular|adrenal tumor| breast (mammary gland) tum…	NA	NA	NA	NA	NA	NA	NA	NA	NA	NA	NA	NA	NA	NA	NA	ENST00000264414	Pfam	IPR001373	Cullin, N-terminal	5.13034	5.81139
TC0200015893.hg.1	3.33132	4.04907	-1.64461	down	DOCK10	dedicator of cytokinesis 10	coding	chr2	-	NM_001290263	224765090	225042613	10	2q36.2	55619	NM_001290263	RefSeq	Homo sapiens dedicator of cytokinesis 10 (DOCK10), transcript variant DOCK10.2, mRNA.	chr2	100	100	0	NA	NM_001290263	Q96BY6	NM_001290263	Hs.46578	adipose tissue| blood| bone| bone marrow| brain| connective tissue| embryonic tissue| eye| heart| intestine| kidney| larynx| lung| lymph node| mammary gland| muscle| ovary| pancreas| prostate| skin| spleen| testis| thymus| uterus| vascular| breast (mammary gland) tumor| chondrosarcoma| colorectal tumor| germ cell tumor| glioma| head and neck tumor| kidney tumor| leukemia| lung tumor| lymphoma| no…	NM_001290263	GO:0007264	small GTPase mediated signal transduction	inferred from electronic annotation	NM_001290263	GO:0005622	intracellular	inferred from electronic annotation	NM_001290263	GO:0005089	Rho guanyl-nucleotide exchange factor activity	inferred from electronic annotation	NA	NA	NA	ENST00000258390	Pfam	IPR001849	Pleckstrin homology domain	3.33132	4.04907
TC0200015963.hg.1	4.59951	5.28115	-1.60396	down	TRIP12	thyroid hormone receptor interactor 12	coding	chr2	-	NM_001284214	229763837	229923239	10	2q36.3	9320	NM_001284214	RefSeq	Homo sapiens thyroid hormone receptor interactor 12 (TRIP12), transcript variant 1, mRNA.	chr2	100	100	0	NA	NM_001284214	Q14669	NA	NA	NA	NA	NA	NA	NA	NM_001284214	GO:0005634	nucleus	inferred from direct assay	NM_001284214	GO:0004842	ubiquitin-protein transferase activity	inferred from direct assay	NA	NA	NA	ENST00000283943	Pfam	IPR000569	HECT domain	4.59951	5.28115
TC0200015971.hg.1	2.45258	3.12591	-1.59475	down	SLC16A14	solute carrier family 16, member 14	coding	chr2	-	NM_152527	230034974	230068999	10	2q36.3	151473	NM_152527	RefSeq	Homo sapiens solute carrier family 16, member 14 (SLC16A14), mRNA.	chr2	100	100	0	NA	NM_152527	Q7RTX9	NM_152527	Hs.504317	bladder| bone| bone marrow| brain| connective tissue| embryonic tissue| esophagus| eye| heart| intestine| kidney| lung| mammary gland| mouth| muscle| ovary| pancreas| prostate| spleen| testis| trachea| uterus| breast (mammary gland) tumor| chondrosarcoma| esophageal tumor| germ cell tumor| glioma| head and neck tumor| kidney tumor| leukemia| lung tumor| non-neoplasia| normal| ovarian tumor| pancr…	NM_152527	GO:0015718	monocarboxylic acid transport	not recorded	NM_152527	GO:0005886	plasma membrane	inferred from electronic annotation	NM_152527	GO:0008028	monocarboxylic acid transmembrane transporter activity	not recorded	NA	NA	NA	ENST00000295190	Pfam	IPR011701	Major facilitator superfamily	2.45258	3.12591
TC0200016018.hg.1	6.69143	7.78856	-2.1393	down	NCL	nucleolin	coding	chr2	-	NM_005381	231453531	231483641	10	2q37.1	4691	NM_005381	RefSeq	Homo sapiens nucleolin (NCL), mRNA.	chr2	100	100	0	NA	NM_005381	P19338	NM_005381	Hs.79110	adipose tissue| adrenal gland| ascites| bladder| blood| bone| bone marrow| brain| cervix| connective tissue| ear| embryonic tissue| esophagus| eye| heart| intestine| kidney| larynx| liver| lung| lymph| lymph node| mammary gland| mouth| muscle| nerve| ovary| pancreas| parathyroid| pharynx| pituitary gland| placenta| prostate| salivary gland| skin| spleen| stomach| testis| thymus| thyroid| tonsil| …	NM_005381	GO:0001525	angiogenesis	inferred from direct assay	NM_005381	GO:0001650	fibrillar center	inferred from electronic annotation	NA	NA	NA	NA	NA	NA	NA	ENST00000322723	Pfam	IPR000504	RNA recognition motif domain	6.69143	7.78856
TC0200016099.hg.1	6.8271	7.63648	-1.75246	down	HJURP	Holliday junction recognition protein	coding	chr2	-	NM_001282962	233833416	233854566	10	2q37.1	55355	NM_001282962	RefSeq	Homo sapiens Holliday junction recognition protein (HJURP), transcript variant 2, mRNA.	chr2	100	100	0	NA	NM_001282962	Q8NCD3	NM_001282962	Hs.532968	adrenal gland| ascites| blood| bone| bone marrow| brain| cervix| connective tissue| embryonic tissue| esophagus| eye| heart| intestine| kidney| liver| lung| lymph| lymph node| mammary gland| mouth| muscle| ovary| pancreas| placenta| skin| stomach| testis| thymus| tonsil| uterus| vascular|adrenal tumor| breast (mammary gland) tumor| chondrosarcoma| colorectal tumor| esophageal tumor| gastrointesti…	NM_001282962	GO:0006334	nucleosome assembly	traceable author statement	NM_001282962	GO:0000775	chromosome, centromeric region	inferred from direct assay	NM_001282962	GO:0003677	DNA binding	inferred from electronic annotation	NA	NA	NA	ENST00000411486	Pfam	IPR018465	Centromere protein Scm3/HJURP	6.8271	7.63648
TC0200016344.hg.1	2.3249	3.23109	-1.87409	down	MTERF4	mitochondrial transcription termination factor 4	coding	chr2	-	NM_182501	241072169	241102332	10	2q37.3	130916	NM_182501	RefSeq	Homo sapiens mitochondrial transcription termination factor 4 (MTERF4), transcript variant 1, mRNA.	chr2	100	100	0	NA	NM_182501	Q7Z6M4	NA	NA	NA	NA	NA	NA	NA	NM_182501	GO:0005737	cytoplasm	inferred from direct assay	NM_182501	GO:0003690	double-stranded DNA binding	inferred from electronic annotation	NA	NA	NA	ENST00000391980	Pfam	IPR003690	Mitochodrial transcription termination factor	2.3249	3.23109
TC0200016347.hg.1	8.58324	9.24656	-1.58372	down	HDLBP	high density lipoprotein binding protein	coding	chr2	-	NM_001243900	241227264	241317061	10	2q37.3	3069	NA	NA	NA	NA	NA	NA	NA	NA	NM_001243900	Q00341	NA	NA	NA	NA	NA	NA	NA	NA	NA	NA	NA	NA	NA	NA	NA	NA	NA	NA	ENST00000310931	Pfam	IPR004088	K Homology domain, type 1	8.58324	9.24656
TC0200016442.hg.1	4.59322	6.01666	-2.68224	down	MSH2	mutS homolog 2	coding	chr2	+	NM_000251	47402969	47513234	10	2p21	4436	NM_000251	RefSeq	Homo sapiens mutS homolog 2 (MSH2), transcript variant 1, mRNA.	chr2	100	100	0	NA	NM_000251	P43246	NM_000251	Hs.597656	adrenal gland| ascites| blood| bone| bone marrow| brain| cervix| connective tissue| ear| embryonic tissue| esophagus| eye| heart| intestine| kidney| liver| lung| lymph| lymph node| mammary gland| mouth| muscle| ovary| pancreas| parathyroid| pharynx| pituitary gland| placenta| prostate| skin| spleen| stomach| testis| thymus| tonsil| trachea| uterus| vascular|adrenal tumor| bladder carcinoma| breas…	NA	NA	NA	NA	NM_000251	GO:0000228	nuclear chromosome	not recorded	NA	NA	NA	NA	NA	NA	NA	ENST00000233146	Pfam	IPR000432	DNA mismatch repair protein MutS, C-terminal	4.59322	6.01666
TC0200016445.hg.1	2.00537	2.91386	-1.87708	down	MSH6	mutS homolog 6	coding	chr2	+	NM_000179	47783082	47810101	10	2p16	2956	NM_000179	RefSeq	Homo sapiens mutS homolog 6 (MSH6), transcript variant 1, mRNA.	chr2	100	100	0	NA	NM_000179	P52701	NM_000179	Hs.445052	adrenal gland| ascites| bladder| blood| bone| bone marrow| brain| cervix| connective tissue| embryonic tissue| esophagus| eye| heart| intestine| kidney| larynx| liver| lung| lymph node| mammary gland| mouth| muscle| ovary| pancreas| parathyroid| placenta| prostate| skin| spleen| stomach| testis| thymus| thyroid| trachea| umbilical cord| uterus|adrenal tumor| breast (mammary gland) tumor| cervical…	NA	NA	NA	NA	NM_000179	GO:0000228	nuclear chromosome	not recorded	NA	NA	NA	NA	NA	NA	NA	ENST00000234420	Pfam	IPR000313	PWWP domain	2.00537	2.91386
TC0200016470.hg.1	4.70908	3.84716	1.81746	up	SNRNP27	small nuclear ribonucleoprotein, U4/U6.U5 27kDa subunit	coding	chr2	+	NM_006857	69893560	69905575	10	2p13.3	11017	NM_006857	RefSeq	Homo sapiens small nuclear ribonucleoprotein 27kDa (U4/U6.U5) (SNRNP27), transcript variant 1, mRNA.	chr2	100	100	0	NA	NM_006857	Q8WVK2	NM_006857	Hs.54649	adipose tissue| adrenal gland| bladder| blood| bone| bone marrow| brain| cervix| connective tissue| ear| embryonic tissue| eye| heart| intestine| kidney| larynx| liver| lung| lymph| lymph node| mammary gland| muscle| ovary| pancreas| pharynx| pituitary gland| placenta| prostate| salivary gland| skin| spleen| stomach| testis| thymus| uterus| vascular| bladder carcinoma| breast (mammary gland) tumo…	NM_006857	GO:0006397	mRNA processing	inferred from electronic annotation	NM_006857	GO:0071011	precatalytic spliceosome	not recorded	NM_006857	GO:0003676	nucleic acid binding	non-traceable author statement	NA	NA	NA	ENST00000244227	Pfam	IPR013957	Domain of unknown function DUF1777	4.70908	3.84716
TC0200016499.hg.1	6.65482	5.87402	1.71808	up	MRPL30	mitochondrial ribosomal protein L30	coding	chr2	+	NM_145212	99181079	99216114	10	2q11.2	51263	NM_145212	RefSeq	Homo sapiens mitochondrial ribosomal protein L30 (MRPL30), transcript variant 1, mRNA.	chr2	100	100	0	NA	NM_145212	Q8TCC3	NM_145212	Hs.346736	adipose tissue| adrenal gland| ascites| blood| bone| bone marrow| brain| cervix| connective tissue| embryonic tissue| esophagus| eye| heart| intestine| kidney| liver| lung| lymph| lymph node| mammary gland| mouth| muscle| nerve| ovary| pancreas| parathyroid| pharynx| placenta| prostate| salivary gland| skin| spleen| stomach| testis| thymus| trachea| umbilical cord| uterus| vascular|adrenal tumor|…	NM_145212	GO:0006996	organelle organization	traceable author statement	NM_145212	GO:0005739	mitochondrion	not recorded	NA	NA	NA	NA	NM_145212	HumanCyc	PWY0-1275	ENST00000338148	Pfam	IPR016082	Ribosomal protein L30, ferredoxin-like fold domain	6.65482	5.87402
TC0200016501.hg.1	10.2545	10.9957	-1.67156	down	IL1RL1	interleukin 1 receptor-like 1	coding	chr2	+	NM_001282408	102311502	102352037	10	2q12	9173	NM_001282408	RefSeq	Homo sapiens interleukin 1 receptor-like 1 (IL1RL1), transcript variant 3, mRNA.	chr2	100	100	0	NA	NM_001282408	Q01638	NM_001282408	Hs.66	adipose tissue| adrenal gland| blood| brain| heart| kidney| liver| lung| nerve| pituitary gland| placenta| stomach| testis| thymus| trachea| uterus| vascular| gastrointestinal tumor| kidney tumor| leukemia| normal| fetus| juvenile| adult	NA	NA	NA	NA	NM_001282408	GO:0005578	proteinaceous extracellular matrix	inferred from electronic annotation	NM_001282408	GO:0002113	interleukin-33 binding	inferred from electronic annotation	NA	NA	NA	ENST00000233954	Pfam	IPR000157	Toll/interleukin-1 receptor homology (TIR) domain	10.2545	10.9957
TC0200016570.hg.1	3.11992	2.48385	1.55409	up	HOXD3	homeobox D3	coding	chr2	+	NM_006898	176160891	176173102	10	2q31.1	3232	NM_006898	RefSeq	Homo sapiens homeobox D3 (HOXD3), mRNA.	chr2	100	100	0	NA	NM_006898	P31249	NM_006898	Hs.93574	brain| kidney| lung| mammary gland| ovary| prostate| uterus| lung tumor| normal| ovarian tumor| primitive neuroectodermal tumor of the CNS| uterine tumor| adult	NM_006898	GO:0006351	transcription, DNA-templated	inferred from mutant phenotype	NM_006898	GO:0005634	nucleus	inferred by curator	NM_006898	GO:0003700	transcription factor activity, sequence-specific DNA binding	inferred from electronic annotation	NA	NA	NA	ENST00000249440	Pfam	IPR001356	Homeobox domain	3.11992	2.48385
TC0200016574.hg.1	4.98463	5.90656	-1.89464	down	DNAJC10	DnaJ (Hsp40) homolog, subfamily C, member 10	coding	chr2	+	NM_001271581	182716041	182780025	10	2q32.1	54431	NM_001271581	RefSeq	Homo sapiens DnaJ (Hsp40) homolog, subfamily C, member 10 (DNAJC10), transcript variant 2, mRNA.	chr2	100	100	0	NA	NM_001271581	Q8IXB1	NM_001271581	Hs.516632	adrenal gland| ascites| blood| bone| bone marrow| brain| connective tissue| ear| embryonic tissue| esophagus| eye| heart| intestine| kidney| liver| lung| lymph| lymph node| mammary gland| mouth| muscle| nerve| ovary| pancreas| parathyroid| pharynx| pituitary gland| placenta| prostate| skin| spleen| stomach| testis| thymus| thyroid| tonsil| trachea| umbilical cord| uterus| vascular| breast (mammar…	NM_001271581	GO:0001933	negative regulation of protein phosphorylation	inferred from direct assay	NM_001271581	GO:0005783	endoplasmic reticulum	inferred from direct assay	NA	NA	NA	NA	NA	NA	NA	ENST00000537515	Pfam	IPR001623	DnaJ domain	4.98463	5.90656
TC0200016607.hg.1	5.64376	6.26485	-1.53804	down	UBE2F	ubiquitin-conjugating enzyme E2F (putative)	coding	chr2	+	NM_001278305	237966827	238042782	10	2q37.3	140739	NM_001278305	RefSeq	Homo sapiens ubiquitin-conjugating enzyme E2F (putative) (UBE2F), transcript variant 2, mRNA.	chr2	100	100	0	NA	NM_001278305	Q969M7	NA	NA	NA	NM_001278305	GO:0016567	protein ubiquitination	not recorded	NM_001278305	GO:0005737	cytoplasm	not recorded	NA	NA	NA	NA	NA	NA	NA	ENST00000272930	Pfam	IPR000608	Ubiquitin-conjugating enzyme E2	5.64376	6.26485
TC0200016664.hg.1	3.49089	4.21816	-1.6555	down	KCNK12	potassium channel, two pore domain subfamily K, member 12	coding	chr2	-	NM_022055	47520776	47570359	10	2p16.3	56660	NM_022055	RefSeq	Homo sapiens potassium channel, two pore domain subfamily K, member 12 (KCNK12), mRNA.	chr2	100	100	0	NA	NM_022055	Q9HB15	NM_022055	Hs.591586	adrenal gland| brain| lymph| nerve| pancreas| placenta| tonsil| germ cell tumor| lymphoma| normal| juvenile| adult	NM_022055	GO:0030322	stabilization of membrane potential	not recorded	NM_022055	GO:0005887	integral component of plasma membrane	not recorded	NM_022055	GO:0005244	voltage-gated ion channel activity	inferred from electronic annotation	NA	NA	NA	NA	NA	NA	NA	3.49089	4.21816
TC0200016682.hg.1	3.20689	4.12558	-1.8904	down	PPP3R1	protein phosphatase 3, regulatory subunit B, alpha	coding	chr2	-	NM_000945	68178857	68256237	10	2p15	5534	NM_000945	RefSeq	Homo sapiens protein phosphatase 3, regulatory subunit B, alpha (PPP3R1), mRNA.	chr2	100	100	0	NA	NM_000945	P63098	NM_000945	Hs.280604	blood| bone| brain| embryonic tissue| eye| intestine| kidney| liver| lung| lymph node| mammary gland| mouth| muscle| nerve| ovary| pancreas| placenta| prostate| skin| spleen| stomach| testis| uterus| vascular| breast (mammary gland) tumor| colorectal tumor| gastrointestinal tumor| germ cell tumor| glioma| leukemia| lymphoma| non-neoplasia| normal| ovarian tumor| pancreatic tumor| primitive neuroe…	NM_000945	GO:0002223	stimulatory C-type lectin receptor signaling pathway	traceable author statement	NM_000945	GO:0005654	nucleoplasm	traceable author statement	NM_000945	GO:0004723	calcium-dependent protein serine/threonine phosphatase activity	non-traceable author statement	NA	NA	NA	ENST00000234310	Pfam	IPR011992	EF-hand domain pair	3.20689	4.12558
TC0200016727.hg.1	3.15013	4.16248	-2.01719	down	IWS1	IWS1 homolog (S. cerevisiae)	coding	chr2	-	NM_017969	127480806	127526886	10	2q14.3	55677	NM_017969	RefSeq	Homo sapiens IWS1 homolog (S. cerevisiae) (IWS1), mRNA.	chr2	100	100	0	NA	NM_017969	Q96ST2	NM_017969	Hs.469879	adipose tissue| adrenal gland| ascites| bladder| blood| bone| bone marrow| brain| cervix| connective tissue| ear| embryonic tissue| esophagus| eye| heart| intestine| kidney| larynx| liver| lung| lymph| lymph node| mammary gland| mouth| muscle| nerve| ovary| pancreas| pharynx| placenta| prostate| skin| spleen| stomach| testis| thymus| thyroid| tonsil| trachea| umbilical cord| uterus| vascular| bre…	NM_017969	GO:0006351	transcription, DNA-templated	inferred from electronic annotation	NM_017969	GO:0005634	nucleus	inferred from direct assay	NM_017969	GO:0003677	DNA binding	inferred from electronic annotation	NA	NA	NA	ENST00000295321	Pfam	IPR017923	Transcription factor IIS, N-terminal	3.15013	4.16248
TC0200016757.hg.1	6.27812	6.86847	-1.50562	down	NCKAP1	NCK-associated protein 1	coding	chr2	-	NM_013436	182924851	183038858	10	2q32	10787	NM_013436	RefSeq	Homo sapiens NCK-associated protein 1 (NCKAP1), transcript variant 1, mRNA.	chr2	100	100	0	NA	NM_013436	Q9Y2A7	NM_013436	Hs.603732	adipose tissue| adrenal gland| ascites| bladder| blood| bone| bone marrow| brain| cervix| connective tissue| ear| embryonic tissue| esophagus| eye| heart| intestine| kidney| larynx| liver| lung| mammary gland| mouth| muscle| ovary| pancreas| pharynx| pituitary gland| placenta| prostate| salivary gland| skin| stomach| testis| thymus| thyroid| trachea| umbilical cord| uterus| vascular|adrenal tumor…	NA	NA	NA	NA	NM_013436	GO:0005829	cytosol	traceable author statement	NM_013436	GO:0005515	protein binding	inferred from physical interaction	NM_013436	GenMAPP	Circadian_Exercise	ENST00000360982	Pfam	IPR019137	Nck-associated protein 1	6.27812	6.86847
TC0200016787.hg.1	5.93743	6.64475	-1.63277	down	NDUFA10	NADH dehydrogenase (ubiquinone) 1 alpha subcomplex, 10, 42kDa	coding	chr2	-	NM_004544	239957372	240025402	10	2q37.3	4705	NM_004544	RefSeq	Homo sapiens NADH dehydrogenase (ubiquinone) 1 alpha subcomplex, 10, 42kDa (NDUFA10), mRNA.	chr2	100	100	0	NA	NM_004544	O95299	NM_004544	Hs.277677	adipose tissue| adrenal gland| ascites| bladder| blood| bone| bone marrow| brain| cervix| connective tissue| ear| embryonic tissue| eye| heart| intestine| kidney| larynx| liver| lung| lymph| lymph node| mammary gland| mouth| muscle| ovary| pancreas| parathyroid| pharynx| pituitary gland| placenta| prostate| salivary gland| skin| spleen| stomach| testis| thymus| thyroid| trachea| umbilical cord| u…	NM_004544	GO:0006120	mitochondrial electron transport, NADH to ubiquinone	non-traceable author statement	NM_004544	GO:0005743	mitochondrial inner membrane	traceable author statement	NM_004544	GO:0008137	NADH dehydrogenase (ubiquinone) activity	non-traceable author statement	NM_004544	GenMAPP	Electron_Transport_Chain	ENST00000252711	Pfam	IPR031314	Deoxynucleoside kinase domain	5.93743	6.64475
TC0300006627.hg.1	3.27851	4.05221	-1.70965	down	TSEN2	TSEN2 tRNA splicing endonuclease subunit	coding	chr3	+	NM_001145392	12484432	12539633	10	3p25.2	80746	NM_001145392	RefSeq	Homo sapiens TSEN2 tRNA splicing endonuclease subunit (TSEN2), transcript variant 2, mRNA.	chr3	100	100	0	NA	NM_001145392	Q8NCE0	NM_001145392	Hs.335550	adrenal gland| ascites| bladder| blood| bone| brain| cervix| connective tissue| embryonic tissue| esophagus| eye| heart| intestine| kidney| liver| lung| lymph| mammary gland| mouth| muscle| nerve| ovary| pancreas| placenta| prostate| skin| spleen| stomach| testis| thymus| uterus| breast (mammary gland) tumor| cervical tumor| chondrosarcoma| colorectal tumor| esophageal tumor| gastrointestinal tum…	NA	NA	NA	NA	NM_001145392	GO:0000214	tRNA-intron endonuclease complex	not recorded	NM_001145392	GO:0000213	tRNA-intron endonuclease activity	not recorded	NA	NA	NA	ENST00000284995	Pfam	IPR006677	tRNA intron endonuclease, catalytic domain-like	3.27851	4.05221
TC0300006758.hg.1	1.69872	2.35319	-1.57404	down	PLCL2	phospholipase C-like 2	coding	chr3	+	NM_001144382	16802651	17090606	10	3p24.3	23228	NM_001144382	RefSeq	Homo sapiens phospholipase C-like 2 (PLCL2), transcript variant 1, mRNA.	chr3	100	100	0	NA	NM_001144382	Q9UPR0	NM_001144382	Hs.741267	adrenal gland| blood| brain| connective tissue| embryonic tissue| eye| heart| kidney| larynx| liver| lung| lymph node| ovary| pancreas| pituitary gland| placenta| prostate| skin| spleen| stomach| testis| thyroid| uterus|adrenal tumor| chondrosarcoma| gastrointestinal tumor| germ cell tumor| head and neck tumor| kidney tumor| leukemia| liver tumor| lung tumor| normal| ovarian tumor| primitive neur…	NM_001144382	GO:0002322	B cell proliferation involved in immune response	inferred from electronic annotation	NM_001144382	GO:0005737	cytoplasm	inferred from electronic annotation	NM_001144382	GO:0004435	phosphatidylinositol phospholipase C activity	inferred from electronic annotation	NM_015184	HumanCyc	LIPASYN-PWY	ENST00000419842	Pfam	IPR000008	C2 domain	1.69872	2.35319
TC0300006982.hg.1	3.9561	3.33384	1.53928	up	TRIM71	tripartite motif containing 71, E3 ubiquitin protein ligase	coding	chr3	+	NM_001039111	32818018	32897826	10	3p22.3	131405	NM_001039111	RefSeq	Homo sapiens tripartite motif containing 71, E3 ubiquitin protein ligase (TRIM71), mRNA.	chr3	100	100	0	NA	NM_001039111	Q2Q1W2	NM_001039111	Hs.567678	embryonic tissue| liver| ovary| testis| germ cell tumor| liver tumor| normal|embryoid body| blastocyst| adult	NM_001039111	GO:0000082	G1/S transition of mitotic cell cycle	inferred from sequence or structural similarity	NM_001039111	GO:0000932	cytoplasmic mRNA processing body	inferred from sequence or structural similarity	NM_001039111	GO:0004842	ubiquitin-protein transferase activity	inferred from sequence or structural similarity	NA	NA	NA	ENST00000383763	Pfam	IPR000315	B-box-type zinc finger	3.9561	3.33384
TC0300007083.hg.1	2.68008	3.26604	-1.50104	down	WDR48	WD repeat domain 48	coding	chr3	+	NM_001303402	39051986	39096671	10	3p21.33	57599	NM_001303402	RefSeq	Homo sapiens WD repeat domain 48 (WDR48), transcript variant 2, mRNA.	chr3	100	100	0	NA	NM_001303402	Q8TAF3	NM_001303402	Hs.109778	adrenal gland| ascites| bladder| blood| bone| bone marrow| brain| cervix| connective tissue| embryonic tissue| eye| heart| intestine| kidney| liver| lung| lymph| lymph node| mammary gland| mouth| muscle| ovary| pancreas| parathyroid| pharynx| pituitary gland| placenta| prostate| skin| spleen| stomach| testis| thymus| thyroid| tonsil| trachea| uterus| vascular|adrenal tumor| breast (mammary gland)…	NA	NA	NA	NA	NM_001303402	GO:0005634	nucleus	inferred from direct assay	NM_001303402	GO:0005515	protein binding	inferred from physical interaction	NA	NA	NA	ENST00000302313	Pfam	IPR001680	WD40 repeat	2.68008	3.26604
TC0300007165.hg.1	4.27721	5.08297	-1.74807	down	NKTR	natural killer cell triggering receptor	coding	chr3	+	NM_005385	42600614	42648741	10	3p22.1	4820	NM_005385	RefSeq	Homo sapiens natural killer cell triggering receptor (NKTR), mRNA.	chr3	100	100	0	NA	NM_005385	P30414	NA	NA	NA	NM_005385	GO:0000413	protein peptidyl-prolyl isomerization	not recorded	NM_005385	GO:0016020	membrane	inferred from electronic annotation	NM_005385	GO:0003755	peptidyl-prolyl cis-trans isomerase activity	not recorded	NA	NA	NA	ENST00000232978	Pfam	IPR002130	Cyclophilin-type peptidyl-prolyl cis-trans isomerase domain	4.27721	5.08297
TC0300007223.hg.1	2.66545	3.72469	-2.08384	down	KIF15	kinesin family member 15	coding	chr3	+	NM_020242	44761717	44873376	10	3p21.31	56992	NM_020242	RefSeq	Homo sapiens kinesin family member 15 (KIF15), mRNA.	chr3	100	100	0	NA	NM_020242	Q9NS87	NM_020242	Hs.658939	ascites| blood| bone| brain| embryonic tissue| esophagus| eye| intestine| kidney| liver| lung| lymph node| mammary gland| mouth| pancreas| placenta| prostate| salivary gland| skin| spleen| stomach| testis| thymus| uterus| vascular| breast (mammary gland) tumor| chondrosarcoma| colorectal tumor| esophageal tumor| gastrointestinal tumor| germ cell tumor| head and neck tumor| kidney tumor| liver tum…	NM_020242	GO:0007018	microtubule-based movement	not recorded	NM_020242	GO:0005813	centrosome	traceable author statement	NM_020242	GO:0003677	DNA binding	traceable author statement	NA	NA	NA	ENST00000326047	Pfam	IPR001752	Kinesin motor domain	2.66545	3.72469
TC0300007242.hg.1	4.06964	5.10739	-2.05302	down	SACM1L	SAC1 suppressor of actin mutations 1-like (yeast)	coding	chr3	+	NM_014016	45689056	45745424	10	3p21.3	22908	NM_014016	RefSeq	Homo sapiens SAC1 suppressor of actin mutations 1-like (yeast) (SACM1L), mRNA.	chr3	100	100	0	NA	NM_014016	Q9NTJ5	NM_014016	Hs.156509	adipose tissue| adrenal gland| ascites| bladder| blood| bone| bone marrow| brain| cervix| connective tissue| ear| embryonic tissue| eye| heart| intestine| kidney| larynx| liver| lung| lymph| lymph node| mammary gland| mouth| muscle| ovary| pancreas| parathyroid| pharynx| pituitary gland| placenta| prostate| salivary gland| skin| spleen| testis| thymus| thyroid| trachea| uterus| vascular|adrenal t…	NM_014016	GO:0006644	phospholipid metabolic process	traceable author statement	NA	NA	NA	NA	NA	NA	NA	NA	NA	NA	NA	ENST00000389061	Pfam	IPR002013	SAC domain	4.06964	5.10739
TC0300007437.hg.1	4.84284	5.5141	-1.59247	down	MANF	mesencephalic astrocyte-derived neurotrophic factor	coding	chr3	+	NM_006010	51385047	51389397	10	3p21.1	7873	NM_006010	RefSeq	Homo sapiens mesencephalic astrocyte-derived neurotrophic factor (MANF), mRNA.	chr3	100	100	0	NA	NM_006010	P55145	NM_006010	Hs.436446	adipose tissue| adrenal gland| ascites| blood| bone| bone marrow| brain| connective tissue| ear| embryonic tissue| eye| heart| intestine| kidney| larynx| liver| lung| lymph| lymph node| mammary gland| nerve| ovary| pancreas| pituitary gland| placenta| prostate| salivary gland| skin| stomach| testis| thymus| thyroid| umbilical cord| uterus| vascular|adrenal tumor| breast (mammary gland) tumor| cho…	NM_006010	GO:0006986	response to unfolded protein	inferred from electronic annotation	NM_006010	GO:0005576	extracellular region	inferred from electronic annotation	NM_006010	GO:0008083	growth factor activity	inferred from electronic annotation	NA	NA	NA	ENST00000528157	Pfam	IPR019345	Armet protein	4.84284	5.5141
TC0300007466.hg.1	4.44996	5.51102	-2.08646	down	ALAS1	5-aminolevulinate synthase 1	coding	chr3	+	NM_000688	52198083	52214327	10	3p21.1	211	NM_000688	RefSeq	Homo sapiens 5-aminolevulinate synthase 1 (ALAS1), transcript variant 1, mRNA.	chr3	100	100	0	NA	NM_000688	P13196	NM_000688	Hs.476308	adrenal gland| ascites| bladder| blood| bone| bone marrow| brain| cervix| connective tissue| embryonic tissue| esophagus| eye| heart| intestine| kidney| liver| lung| lymph| lymph node| mammary gland| mouth| muscle| ovary| pancreas| pharynx| placenta| prostate| skin| spleen| stomach| testis| thymus| thyroid| tonsil| trachea| uterus| vascular|adrenal tumor| breast (mammary gland) tumor| cervical tu…	NM_000688	GO:0006778	porphyrin-containing compound metabolic process	traceable author statement	NM_000688	GO:0005654	nucleoplasm	inferred from direct assay	NM_000688	GO:0003870	5-aminolevulinate synthase activity	inferred from electronic annotation	NM_000688	GenMAPP	Heme_Biosynthesis	ENST00000310271	Pfam	IPR004839	Aminotransferase, class I/classII	4.44996	5.51102
TC0300007607.hg.1	3.5014	4.34001	-1.78833	down	RPP14	ribonuclease P/MRP 14kDa subunit	coding	chr3	+	NM_001098783	58306245	58324695	10	3p14.3	11102	NM_001098783	RefSeq	Homo sapiens ribonuclease P/MRP 14kDa subunit (RPP14), transcript variant 1, mRNA.	chr3	100	100	0	NA	NM_001098783	O95059	NM_001098783	Hs.446320	adrenal gland| bladder| blood| bone marrow| brain| connective tissue| embryonic tissue| esophagus| eye| heart| intestine| kidney| liver| lung| lymph node| mammary gland| muscle| ovary| pancreas| parathyroid| pharynx| placenta| prostate| salivary gland| skin| spleen| stomach| testis| thymus| trachea| uterus| bladder carcinoma| breast (mammary gland) tumor| colorectal tumor| esophageal tumor| germ …	NM_001098783	GO:0008033	tRNA processing	traceable author statement	NM_001098783	GO:0005634	nucleus	traceable author statement	NM_001098783	GO:0003723	RNA binding	traceable author statement	NA	NA	NA	ENST00000295959	Pfam	IPR002759	Ribonuclease P/MRP protein subunit	3.5014	4.34001
TC0300008002.hg.1	4.28363	5.10169	-1.76304	down	CHMP2B	charged multivesicular body protein 2B	coding	chr3	+	NM_001244644	87227263	87255548	10	3p11.2	25978	NM_001244644	RefSeq	Homo sapiens charged multivesicular body protein 2B (CHMP2B), transcript variant 2, mRNA.	chr3	100	100	0	NA	NM_001244644	Q9UQN3	NM_001244644	Hs.476930	adrenal gland| ascites| bladder| blood| bone| bone marrow| brain| cervix| connective tissue| ear| embryonic tissue| esophagus| eye| heart| intestine| kidney| liver| lung| lymph| lymph node| mammary gland| mouth| muscle| nerve| ovary| pancreas| parathyroid| pharynx| placenta| prostate| skin| spleen| stomach| testis| thyroid| trachea| uterus| vascular|adrenal tumor| bladder carcinoma| breast (mamma…	NM_001244644	GO:0000920	cell separation after cytokinesis	inferred from mutant phenotype	NM_001244644	GO:0000815	ESCRT III complex	inferred from direct assay	NM_001244644	GO:0005515	protein binding	inferred from physical interaction	NA	NA	NA	ENST00000263780	Pfam	IPR005024	Snf7 family	4.28363	5.10169
TC0300008242.hg.1	6.04781	6.85201	-1.74618	down	ALCAM	activated leukocyte cell adhesion molecule	coding	chr3	+	NM_001243280	105366713	105576913	10	3q13.1	214	NM_001243280	RefSeq	Homo sapiens activated leukocyte cell adhesion molecule (ALCAM), transcript variant 2, mRNA.	chr3	100	100	0	NA	NM_001243280	Q13740	NA	NA	NA	NM_001243280	GO:0007155	cell adhesion	inferred from sequence or structural similarity	NM_001243280	GO:0001772	immunological synapse	inferred from direct assay	NM_001243280	GO:0005102	receptor binding	traceable author statement	NA	NA	NA	ENST00000306107	Pfam	IPR013106	Immunoglobulin V-set domain	6.04781	6.85201
TC0300008289.hg.1	2.4752	3.20946	-1.66355	down	DZIP3	DAZ interacting zinc finger protein 3	coding	chr3	+	NM_014648	108589490	108694846	10	3q13.13	9666	NM_014648	RefSeq	Homo sapiens DAZ interacting zinc finger protein 3 (DZIP3), mRNA.	chr3	100	100	0	NA	NM_014648	Q86Y13	NM_014648	Hs.409210	ascites| blood| bone| brain| embryonic tissue| eye| heart| intestine| kidney| liver| lung| lymph node| mammary gland| muscle| nerve| ovary| pancreas| parathyroid| pituitary gland| placenta| prostate| skin| stomach| testis| thymus| thyroid| trachea| uterus| breast (mammary gland) tumor| colorectal tumor| gastrointestinal tumor| germ cell tumor| glioma| head and neck tumor| kidney tumor| liver tumo…	NM_014648	GO:0000209	protein polyubiquitination	inferred from direct assay	NM_014648	GO:0005737	cytoplasm	inferred from direct assay	NM_014648	GO:0003723	RNA binding	inferred from direct assay	NA	NA	NA	ENST00000361582	Pfam	IPR001841	Zinc finger, RING-type	2.4752	3.20946
TC0300008474.hg.1	3.95528	4.71983	-1.69883	down	POGLUT1	protein O-glucosyltransferase 1	coding	chr3	+	NM_152305	119468938	119494708	10	3q13.33	56983	NM_152305	RefSeq	Homo sapiens protein O-glucosyltransferase 1 (POGLUT1), transcript variant 1, mRNA.	chr3	100	100	0	NA	NM_152305	Q8NBL1	NM_152305	Hs.231750	adrenal gland| blood| bone| bone marrow| brain| connective tissue| ear| embryonic tissue| eye| heart| intestine| kidney| larynx| liver| lung| lymph node| mammary gland| mouth| muscle| nerve| ovary| pancreas| parathyroid| pharynx| pituitary gland| placenta| prostate| skin| stomach| testis| thymus| thyroid| uterus| vascular| bladder carcinoma| breast (mammary gland) tumor| chondrosarcoma| colorecta…	NM_152305	GO:0006493	protein O-linked glycosylation	inferred from direct assay	NM_152305	GO:0005788	endoplasmic reticulum lumen	inferred from direct assay	NM_152305	GO:0030158	protein xylosyltransferase activity	inferred from electronic annotation	NA	NA	NA	ENST00000295588	Pfam	IPR006598	Lipopolysaccharide-modifying protein	3.95528	4.71983
TC0300008558.hg.1	2.47927	3.47196	-1.98989	down	DTX3L	deltex 3 like, E3 ubiquitin ligase	coding	chr3	+	NM_138287	122564238	122575203	10	3q21.1	151636	NM_138287	RefSeq	Homo sapiens deltex 3 like, E3 ubiquitin ligase (DTX3L), mRNA.	chr3	100	100	0	NA	NM_138287	Q8TDB6	NM_138287	Hs.518201	adrenal gland| bladder| blood| bone| bone marrow| brain| cervix| connective tissue| embryonic tissue| esophagus| eye| heart| intestine| kidney| larynx| liver| lung| lymph| lymph node| mammary gland| mouth| muscle| ovary| pancreas| parathyroid| placenta| prostate| skin| stomach| testis| thymus| thyroid| trachea| uterus| vascular|adrenal tumor| bladder carcinoma| breast (mammary gland) tumor| cervi…	NM_138287	GO:0006302	double-strand break repair	inferred from mutant phenotype	NM_138287	GO:0005634	nucleus	inferred from direct assay	NM_138287	GO:0004842	ubiquitin-protein transferase activity	inferred from direct assay	NA	NA	NA	ENST00000296161	Pfam	IPR001841	Zinc finger, RING-type	2.47927	3.47196
TC0300008735.hg.1	8.94452	9.65638	-1.63792	down	RAB7A	RAB7A, member RAS oncogene family	coding	chr3	+	NM_004637	128726122	128814798	10	3q21.3	7879	NM_004637	RefSeq	Homo sapiens RAB7A, member RAS oncogene family (RAB7A), mRNA.	chr3	100	100	0	NA	NM_004637	P51149	NM_004637	Hs.744853	adipose tissue| adrenal gland| ascites| bladder| blood| bone| bone marrow| brain| cervix| connective tissue| ear| embryonic tissue| esophagus| eye| heart| intestine| kidney| larynx| liver| lung| lymph| lymph node| mammary gland| mouth| muscle| nerve| ovary| pancreas| parathyroid| pharynx| pituitary gland| placenta| prostate| salivary gland| skin| spleen| stomach| testis| thymus| thyroid| tonsil| …	NA	NA	NA	NA	NA	NA	NA	NA	NM_004637	GO:0003924	GTPase activity	inferred from direct assay	NA	NA	NA	ENST00000265062	Pfam	IPR001806	Small GTPase superfamily	8.94452	9.65638
TC0300008846.hg.1	3.37366	4.12456	-1.68285	down	DNAJC13	DnaJ (Hsp40) homolog, subfamily C, member 13	coding	chr3	+	NM_015268	132417526	132539032	10	3q22.1	23317	NM_015268	RefSeq	Homo sapiens DnaJ (Hsp40) homolog, subfamily C, member 13 (DNAJC13), mRNA.	chr3	100	100	0	NA	NM_015268	O75165	NM_015268	Hs.12707	adrenal gland| ascites| bladder| blood| bone| bone marrow| brain| cervix| connective tissue| embryonic tissue| eye| heart| intestine| kidney| larynx| liver| lung| lymph| lymph node| mammary gland| mouth| muscle| ovary| pancreas| parathyroid| pharynx| pituitary gland| placenta| prostate| salivary gland| skin| stomach| testis| thymus| thyroid| trachea| uterus| vascular| bladder carcinoma| breast (m…	NM_015268	GO:0001649	osteoblast differentiation	inferred from direct assay	NM_015268	GO:0005737	cytoplasm	inferred from direct assay	NM_015268	GO:0005515	protein binding	inferred from physical interaction	NA	NA	NA	ENST00000260818	Pfam	IPR001623	DnaJ domain	3.37366	4.12456
TC0300008849.hg.1	2.29868	3.40586	-2.15423	down	UBA5	ubiquitin-like modifier activating enzyme 5	coding	chr3	+	NM_024818	132654446	132678100	10	3q22.1	79876	NM_024818	RefSeq	Homo sapiens ubiquitin-like modifier activating enzyme 5 (UBA5), transcript variant 1, mRNA.	chr3	100	100	0	NA	NM_024818	Q9GZZ9	NM_024818	Hs.170737	adipose tissue| adrenal gland| ascites| bladder| blood| bone| bone marrow| brain| cervix| connective tissue| embryonic tissue| esophagus| eye| intestine| kidney| liver| lung| lymph node| mammary gland| mouth| muscle| ovary| pancreas| parathyroid| pituitary gland| placenta| prostate| skin| spleen| stomach| testis| thymus| thyroid| trachea| uterus| vascular|adrenal tumor| breast (mammary gland) tum…	NM_024818	GO:0033146	regulation of intracellular estrogen receptor signaling pathway	inferred from mutant phenotype	NM_024818	GO:0005634	nucleus	inferred from electronic annotation	NM_024818	GO:0005515	protein binding	inferred from physical interaction	NA	NA	NA	ENST00000264991	Pfam	IPR000594	THIF-type NAD/FAD binding fold	2.29868	3.40586
TC0300008989.hg.1	2.58803	3.19467	-1.5227	down	SLC25A36	solute carrier family 25 (pyrimidine nucleotide carrier), member 36	coding	chr3	+	NM_001104647	140941820	140979943	10	3q23	55186	NM_001104647	RefSeq	Homo sapiens solute carrier family 25 (pyrimidine nucleotide carrier), member 36 (SLC25A36), transcript variant 1, mRNA.	chr3	100	100	0	NA	NM_001104647	Q96CQ1	NM_001104647	Hs.144130	adrenal gland| ascites| bladder| blood| bone| bone marrow| brain| cervix| connective tissue| ear| embryonic tissue| esophagus| eye| heart| intestine| kidney| liver| lung| lymph| lymph node| mammary gland| mouth| muscle| nerve| ovary| pancreas| parathyroid| pituitary gland| placenta| prostate| salivary gland| skin| stomach| testis| thymus| thyroid| trachea| uterus| bladder carcinoma| breast (mamma…	NM_001104647	GO:0000002	mitochondrial genome maintenance	inferred from direct assay	NM_001104647	GO:0005739	mitochondrion	inferred from direct assay	NM_001104647	GO:0015218	pyrimidine nucleotide transmembrane transporter activity	inferred from direct assay	NA	NA	NA	ENST00000324194	Pfam	IPR018108	Mitochondrial substrate/solute carrier	2.58803	3.19467
TC0300009147.hg.1	8.26807	7.6624	1.52168	up	RNF13	ring finger protein 13	coding	chr3	+	NM_007282	149812688	149962139	10	3q25.1	11342	NM_007282	RefSeq	Homo sapiens ring finger protein 13 (RNF13), transcript variant 1, mRNA.	chr3	100	100	0	NA	NM_007282	O43567	NA	NA	NA	NM_007282	GO:0051865	protein autoubiquitination	inferred from sequence or structural similarity	NA	NA	NA	NA	NM_007282	GO:0004842	ubiquitin-protein transferase activity	inferred from sequence or structural similarity	NA	NA	NA	ENST00000344229	Pfam	IPR001841	Zinc finger, RING-type	8.26807	7.6624
TC0300009279.hg.1	2.1195	2.78473	-1.58582	down	KCNAB1	potassium channel, voltage gated subfamily A regulatory beta subunit 1	coding	chr3	+	NM_001308217	156037701	156539138	10	3q26.1	7881	NM_001308217	RefSeq	Homo sapiens potassium channel, voltage gated subfamily A regulatory beta subunit 1 (KCNAB1), transcript variant 4, mRNA.	chr3	100	100	0	NA	NM_001308217	Q14722	NM_001308217	Hs.654519	bone| brain| connective tissue| embryonic tissue| eye| intestine| kidney| mammary gland| mouth| nerve| placenta| prostate| skin| stomach| testis| thymus| thyroid| trachea| uterus| breast (mammary gland) tumor| germ cell tumor| glioma| head and neck tumor| kidney tumor| non-neoplasia| normal| primitive neuroectodermal tumor of the CNS| skin tumor| soft tissue/muscle tissue tumor| fetus| juvenile| …	NA	NA	NA	NA	NA	NA	NA	NA	NA	NA	NA	NA	NA	NA	NA	ENST00000302490	Pfam	IPR023210	NADP-dependent oxidoreductase domain	2.1195	2.78473
TC0300009302.hg.1	4.27235	5.05708	-1.72277	down	PQLC2L	PQ loop repeat containing 2-like	coding	chr3	+	NM_001099777	157543246	157677749	10	3q25.32	152078	NM_001099777	RefSeq	Homo sapiens PQ loop repeat containing 2-like (PQLC2L), transcript variant 3, mRNA.	chr3	100	100	0	NA	NM_001099777	A1A4F0	NM_001099777	Hs.259046	brain| connective tissue| kidney| larynx| liver| lung| pancreas| prostate| testis| uterus| chondrosarcoma| head and neck tumor| kidney tumor| liver tumor| normal| pancreatic tumor| soft tissue/muscle tissue tumor| uterine tumor| adult	NA	NA	NA	NA	NA	NA	NA	NA	NA	NA	NA	NA	NA	NA	NA	NA	NA	NA	NA	4.27235	5.05708
TC0300009324.hg.1	6.39128	5.11582	2.42076	up	IQCJ	IQ motif containing J	coding	chr3	+	NM_001042705	158962235	159897366	10	3q25.32	654502	NM_001042705	RefSeq	Homo sapiens IQ motif containing J (IQCJ), transcript variant 1, mRNA.	chr3	100	100	0	NA	NM_001042705	Q1A5X6	NM_001042705	Hs.570685	brain| kidney| testis| germ cell tumor| kidney tumor| normal| fetus| adult	NM_001197107	GO:0008150	biological_process	no biological data available	NM_001197107	GO:0005737	cytoplasm	inferred from electronic annotation	NM_001197107	GO:0005515	protein binding	inferred from physical interaction	NA	NA	NA	ENST00000397832	Pfam	IPR029362	Fusion protein IQCJ-SCHIP1 with IQ-like motif	6.39128	5.11582
TC0300009337.hg.1	5.35012	6.43494	-2.12111	down	SMC4	structural maintenance of chromosomes 4	coding	chr3	+	NM_001002800	160399274	160434962	10	3q26.1	10051	NM_001002800	RefSeq	Homo sapiens structural maintenance of chromosomes 4 (SMC4), transcript variant 2, mRNA.	chr3	100	100	0	NA	NM_001002800	Q9NTJ3	NA	NA	NA	NA	NA	NA	NA	NA	NA	NA	NA	NM_001002800	GO:0005515	protein binding	inferred from physical interaction	NA	NA	NA	ENST00000344722	Pfam	IPR003395	RecF/RecN/SMC, N-terminal	5.35012	6.43494
TC0300009471.hg.1	4.17456	4.90363	-1.65757	down	SKIL	SKI-like proto-oncogene	coding	chr3	+	NM_001145097	170357678	170397227	10	3q26	6498	NM_001145097	RefSeq	Homo sapiens SKI-like proto-oncogene (SKIL), transcript variant 2, mRNA.	chr3	100	100	0	NA	NM_001145097	P12757	NM_001145097	Hs.536655	adipose tissue| adrenal gland| bladder| blood| bone| brain| cervix| connective tissue| ear| embryonic tissue| esophagus| eye| heart| intestine| kidney| larynx| liver| lung| lymph node| mammary gland| mouth| muscle| ovary| pancreas| parathyroid| pituitary gland| placenta| prostate| salivary gland| skin| stomach| testis| thymus| thyroid| trachea| uterus|adrenal tumor| bladder carcinoma| breast (mam…	NA	NA	NA	NA	NM_001145097	GO:0001669	acrosomal vesicle	inferred from electronic annotation	NM_001145097	GO:0000978	RNA polymerase II core promoter proximal region sequence-specific DNA binding	inferred from direct assay	NM_001145097	GenMAPP	TGF_Beta_Signaling_Pathway	ENST00000259119	Pfam	IPR003380	Transforming protein Ski	4.17456	4.90363
TC0300009524.hg.1	2.07912	2.73942	-1.58041	down	ECT2	epithelial cell transforming 2	coding	chr3	+	NM_001258315	172750682	172821474	10	3q26.1-q26.2	1894	NM_001258315	RefSeq	Homo sapiens epithelial cell transforming 2 (ECT2), transcript variant 1, mRNA.	chr3	100	100	0	NA	NM_001258315	Q9H8V3	NM_001258315	Hs.518299	adrenal gland| ascites| bladder| blood| bone| bone marrow| brain| cervix| connective tissue| embryonic tissue| esophagus| eye| heart| intestine| kidney| larynx| liver| lung| lymph node| mammary gland| mouth| muscle| nerve| ovary| pancreas| parathyroid| pharynx| placenta| prostate| salivary gland| skin| stomach| testis| thymus| thyroid| trachea| uterus|adrenal tumor| bladder carcinoma| breast (mam…	NA	NA	NA	NA	NA	NA	NA	NA	NA	NA	NA	NA	NA	NA	NA	ENST00000232458	Pfam	IPR000219	Dbl homology (DH) domain	2.07912	2.73942
TC0300009724.hg.1	2.40117	4.62153	-4.66012	down	VPS8	vacuolar protein sorting 8 homolog (S. cerevisiae)	coding	chr3	+	NM_001009921	184812143	185052614	10	3q27.2	23355	NM_001009921	RefSeq	Homo sapiens vacuolar protein sorting 8 homolog (S. cerevisiae) (VPS8), transcript variant 1, mRNA.	chr3	100	100	0	NA	NM_001009921	Q8N3P4	NA	NA	NA	NM_001009921	GO:0015031	protein transport	inferred from electronic annotation	NM_001009921	GO:0005769	early endosome	inferred from direct assay	NM_001009921	GO:0005515	protein binding	inferred from physical interaction	NA	NA	NA	ENST00000287546	Pfam	IPR025941	Vacuolar protein sorting-associated protein 8, central domain	2.40117	4.62153
TC0300009855.hg.1	1.92824	2.78343	-1.80899	down	IL1RAP	interleukin 1 receptor accessory protein	coding	chr3	+	NM_001167928	190514051	190659750	10	3q28	3556	NM_001167928	RefSeq	Homo sapiens interleukin 1 receptor accessory protein (IL1RAP), transcript variant 3, mRNA.	chr3	100	100	0	NA	NM_001167928	Q9NPH3	NM_001167928	Hs.478673	ascites| bladder| blood| bone marrow| brain| connective tissue| embryonic tissue| intestine| larynx| liver| lung| lymph node| mammary gland| mouth| pancreas| placenta| prostate| skin| thymus| thyroid| trachea| uterus| vascular| breast (mammary gland) tumor| chondrosarcoma| colorectal tumor| gastrointestinal tumor| germ cell tumor| glioma| head and neck tumor| leukemia| non-neoplasia| normal| skin…	NA	NA	NA	NA	NA	NA	NA	NA	NM_001167928	GO:0004871	signal transducer activity	traceable author statement	NA	NA	NA	ENST00000072516	Pfam	IPR000157	Toll/interleukin-1 receptor homology (TIR) domain	1.92824	2.78343
TC0300009890.hg.1	1.58048	2.25921	-1.60072	down	HRASLS	HRAS-like suppressor	coding	chr3	+	NM_020386	193241125	193277738	10	3q29	57110	NM_020386	RefSeq	Homo sapiens HRAS-like suppressor (HRASLS), mRNA.	chr3	100	100	0	NA	NM_020386	Q9HDD0	NM_020386	Hs.36761	ascites| blood| brain| cervix| eye| lung| muscle| ovary| pituitary gland| prostate| testis| uterus| gastrointestinal tumor| germ cell tumor| glioma| leukemia| lung tumor| normal| ovarian tumor| prostate cancer| fetus| adult	NM_020386	GO:0016042	lipid catabolic process	inferred from electronic annotation	NM_020386	GO:0016021	integral component of membrane	inferred from electronic annotation	NM_020386	GO:0016740	transferase activity	inferred from electronic annotation	NA	NA	NA	ENST00000264735	Pfam	IPR007053	LRAT-like domain	1.58048	2.25921
TC0300009897.hg.1	5.38754	6.60276	-2.32175	down	OPA1	optic atrophy 1 (autosomal dominant)	coding	chr3	+	NM_015560	193593144	193697823	10	3q29	4976	NM_015560	RefSeq	Homo sapiens optic atrophy 1 (autosomal dominant) (OPA1), transcript variant 1, mRNA.	chr3	100	100	0	NA	NM_015560	O60313	NA	NA	NA	NA	NA	NA	NA	NA	NA	NA	NA	NM_015560	GO:0000287	magnesium ion binding	non-traceable author statement	NA	NA	NA	NA	NA	NA	NA	5.38754	6.60276
TC0300010026.hg.1	2.20325	2.83212	-1.54635	down	FBXO45	F-box protein 45	coding	chr3	+	NM_001105573	196568611	196589059	10	3q29	200933	NM_001105573	RefSeq	Homo sapiens F-box protein 45 (FBXO45), mRNA.	chr3	100	100	0	NA	NM_001105573	P0C2W1	NM_001105573	Hs.169815	adrenal gland| ascites| blood| bone| bone marrow| brain| cervix| connective tissue| embryonic tissue| esophagus| eye| intestine| kidney| larynx| liver| lung| lymph node| mammary gland| mouth| muscle| pancreas| parathyroid| placenta| prostate| skin| stomach| testis| thymus| thyroid| uterus| vascular| breast (mammary gland) tumor| cervical tumor| chondrosarcoma| colorectal tumor| esophageal tumor| …	NM_001105573	GO:0001764	neuron migration	inferred from electronic annotation	NM_001105573	GO:0014069	postsynaptic density	inferred from electronic annotation	NM_001105573	GO:0005515	protein binding	inferred from physical interaction	NA	NA	NA	ENST00000311630	Pfam	IPR001810	F-box domain	2.20325	2.83212
TC0300010217.hg.1	1.72831	2.46109	-1.66184	down	CIDEC	cell death-inducing DFFA-like effector c	coding	chr3	-	NM_001199551	9866710	9880254	10	3p25.3	63924	NM_001199551	RefSeq	Homo sapiens cell death-inducing DFFA-like effector c (CIDEC), transcript variant 2, mRNA.	chr3	100	100	0	NA	NM_001199551	Q96AQ7	NM_001199551	Hs.567562	adipose tissue| bone| bone marrow| brain| intestine| mammary gland| muscle| pancreas| skin| testis| colorectal tumor| normal| adult	NM_001199551	GO:0006351	transcription, DNA-templated	inferred from electronic annotation	NM_001199551	GO:0005634	nucleus	inferred from electronic annotation	NM_001199551	GO:0003674	molecular_function	no biological data available	NA	NA	NA	ENST00000336832	Pfam	IPR003508	CIDE-N domain	1.72831	2.46109
TC0300010968.hg.1	2.02068	3.03217	-2.016	down	SETD2	SET domain containing 2	coding	chr3	-	NM_014159	47016408	47163977	10	3p21.31	29072	NM_014159	RefSeq	Homo sapiens SET domain containing 2 (SETD2), mRNA.	chr3	100	100	0	NA	NM_014159	Q9BYW2	NM_014159	Hs.517941	adrenal gland| ascites| blood| bone| bone marrow| brain| cervix| connective tissue| embryonic tissue| eye| heart| intestine| kidney| liver| lung| lymph node| mammary gland| mouth| muscle| nerve| ovary| pancreas| pharynx| placenta| prostate| skin| spleen| stomach| testis| thymus| thyroid| tonsil| trachea| uterus| breast (mammary gland) tumor| cervical tumor| chondrosarcoma| colorectal tumor| gastr…	NA	NA	NA	NA	NM_014159	GO:0005654	nucleoplasm	traceable author statement	NM_014159	GO:0005515	protein binding	inferred from physical interaction	NA	NA	NA	ENST00000409792	Pfam	IPR001202	WW domain	2.02068	3.03217
TC0300011047.hg.1	8.26855	8.87308	-1.52049	down	IMPDH2	IMP (inosine 5-monophosphate) dehydrogenase 2	coding	chr3	-	NM_000884	49024325	49029442	10	3p21.2	3615	NM_000884	RefSeq	Homo sapiens IMP (inosine 5-monophosphate) dehydrogenase 2 (IMPDH2), mRNA.	chr3	100	100	0	NA	NM_000884	P12268	NM_000884	Hs.654400	adrenal gland| ascites| bladder| blood| bone| bone marrow| brain| cervix| connective tissue| ear| embryonic tissue| eye| heart| intestine| kidney| liver| lung| lymph| lymph node| mammary gland| mouth| muscle| nerve| ovary| pancreas| parathyroid| pharynx| pituitary gland| placenta| prostate| salivary gland| skin| spleen| stomach| testis| thymus| thyroid| tonsil| uterus|adrenal tumor| bladder carci…	NA	NA	NA	NA	NM_000884	GO:0005634	nucleus	inferred from direct assay	NM_000884	GO:0000166	nucleotide binding	inferred from direct assay	NM_000884	HumanCyc	PWY-6125	ENST00000326739	Pfam	IPR000644	CBS domain	8.26855	8.87308
TC0300011081.hg.1	4.21041	3.47642	1.66324	up	UBA7	ubiquitin-like modifier activating enzyme 7	coding	chr3	-	NM_003335	49805205	49813958	10	3p21	7318	NM_003335	RefSeq	Homo sapiens ubiquitin-like modifier activating enzyme 7 (UBA7), mRNA.	chr3	100	100	0	NA	NM_003335	P41226	NM_003335	Hs.16695	adipose tissue| blood| bone| bone marrow| brain| connective tissue| esophagus| eye| heart| intestine| kidney| larynx| liver| lung| lymph| lymph node| mammary gland| muscle| nerve| ovary| pancreas| pituitary gland| placenta| prostate| skin| spleen| stomach| testis| thyroid| uterus| breast (mammary gland) tumor| chondrosarcoma| colorectal tumor| esophageal tumor| gastrointestinal tumor| germ cell t…	NM_003335	GO:0006281	DNA repair	traceable author statement	NM_003335	GO:0005634	nucleus	not recorded	NM_003335	GO:0004839	ubiquitin activating enzyme activity	not recorded	NM_003335	GenMAPP	Proteasome_Degradation	ENST00000333486	Pfam	IPR000594	THIF-type NAD/FAD binding fold	4.21041	3.47642
TC0300011152.hg.1	3.5195	4.10657	-1.5022	down	DUSP7	dual specificity phosphatase 7	coding	chr3	-	NM_001947	52048919	52056550	10	3p21	1849	NM_001947	RefSeq	Homo sapiens dual specificity phosphatase 7 (DUSP7), mRNA.	chr3	100	100	0	NA	NM_001947	Q16829	NM_001947	Hs.591664	bladder| blood| bone| brain| cervix| embryonic tissue| eye| intestine| lung| lymph| lymph node| mouth| muscle| ovary| pancreas| placenta| prostate| skin| testis| uterus| vascular| cervical tumor| gastrointestinal tumor| germ cell tumor| glioma| head and neck tumor| leukemia| lymphoma| non-neoplasia| normal| ovarian tumor| pancreatic tumor| primitive neuroectodermal tumor of the CNS| prostate canc…	NM_001947	GO:0000165	MAPK cascade	traceable author statement	NM_001947	GO:0005654	nucleoplasm	traceable author statement	NM_001947	GO:0004725	protein tyrosine phosphatase activity	inferred from electronic annotation	NA	NA	NA	ENST00000469623	Pfam	IPR000340	Dual specificity phosphatase, catalytic domain	3.5195	4.10657
TC0300011249.hg.1	2.56677	3.39054	-1.77003	down	WNT5A	wingless-type MMTV integration site family, member 5A	coding	chr3	-	ENST00000624674	55489155	55490539	10	3p21-p14	7474	ENST00000624674	ENSEMBL	wingless-type MMTV integration site family, member 5A [gene_biotype:protein_coding transcript_biotype:processed_transcript]	chr3	100	100	0	NA	ENST00000624674	P41221	ENST00000624674	Hs.643085	ascites| bladder| bone| bone marrow| brain| connective tissue| ear| embryonic tissue| eye| heart| intestine| kidney| lung| mammary gland| mouth| muscle| nerve| ovary| placenta| prostate| skin| testis| trachea| uterus| bladder carcinoma| chondrosarcoma| colorectal tumor| gastrointestinal tumor| germ cell tumor| glioma| head and neck tumor| non-neoplasia| normal| ovarian tumor| primitive neuroectod…	NA	NA	NA	NA	ENST00000624674	GO:0005576	extracellular region	traceable author statement	ENST00000624674	GO:0003700	transcription factor activity, sequence-specific DNA binding	inferred from mutant phenotype	ENST00000624674	GenMAPP	Wnt_signaling	NA	NA	NA	NA	2.56677	3.39054
TC0300011516.hg.1	2.03262	2.82401	-1.73074	down	EIF4E3	eukaryotic translation initiation factor 4E family member 3	coding	chr3	-	NM_001134649	71675416	71754773	10	3p14	317649	NM_001134649	RefSeq	Homo sapiens eukaryotic translation initiation factor 4E family member 3 (EIF4E3), transcript variant 3, mRNA.	chr3	100	100	0	NA	NM_001134649	Q8N5X7	NM_001134649	Hs.581355	adipose tissue| blood| bone marrow| brain| connective tissue| embryonic tissue| esophagus| eye| heart| intestine| kidney| liver| lung| mammary gland| muscle| nerve| ovary| pancreas| parathyroid| placenta| prostate| skin| spleen| stomach| testis| thyroid| trachea| uterus| vascular| chondrosarcoma| colorectal tumor| esophageal tumor| gastrointestinal tumor| germ cell tumor| glioma| head and neck tu…	NM_001134649	GO:0006413	translational initiation	inferred from electronic annotation	NM_001134649	GO:0005829	cytosol	traceable author statement	NM_001134649	GO:0003743	translation initiation factor activity	inferred from electronic annotation	NA	NA	NA	ENST00000295612	Pfam	IPR001040	Translation Initiation factor eIF- 4e	2.03262	2.82401
TC0300011651.hg.1	5.10535	6.1755	-2.09964	down	GBE1	glucan (1,4-alpha-), branching enzyme 1	coding	chr3	-	NM_000158	81489699	81762161	10	3p12.3	2632	NM_000158	RefSeq	Homo sapiens glucan (1,4-alpha-), branching enzyme 1 (GBE1), mRNA.	chr3	100	100	0	NA	NM_000158	Q04446	NM_000158	Hs.436062	adrenal gland| ascites| bladder| blood| bone| brain| connective tissue| embryonic tissue| esophagus| eye| heart| intestine| kidney| larynx| liver| lung| lymph| lymph node| mammary gland| mouth| muscle| nerve| pancreas| pharynx| pituitary gland| placenta| prostate| skin| spleen| stomach| testis| thymus| thyroid| tonsil| trachea| umbilical cord| uterus| vascular|adrenal tumor| bladder carcinoma| br…	NM_000158	GO:0005975	carbohydrate metabolic process	traceable author statement	NM_000158	GO:0005829	cytosol	traceable author statement	NM_000158	GO:0003844	1,4-alpha-glucan branching enzyme activity	inferred from electronic annotation	NM_000158	GenMAPP	Glycogen_Metabolism	ENST00000429644	Pfam	IPR004193	Glycoside hydrolase, family 13, N-terminal	5.10535	6.1755
TC0300011706.hg.1	2.89124	3.9672	-2.10812	down	VGLL3	vestigial-like family member 3	coding	chr3	-	NM_016206	86937969	86991119	10	3p12.1	389136	NM_016206	RefSeq	Homo sapiens vestigial-like family member 3 (VGLL3), mRNA.	chr3	100	100	0	NA	NM_016206	A8MV65	NM_016206	Hs.744116	adipose tissue| ascites| bladder| bone marrow| brain| connective tissue| embryonic tissue| intestine| liver| lung| mammary gland| muscle| nerve| pancreas| placenta| prostate| skin| testis| trachea| uterus| vascular| chondrosarcoma| gastrointestinal tumor| germ cell tumor| glioma| liver tumor| non-neoplasia| normal| pancreatic tumor| uterine tumor|embryoid body| blastocyst| fetus| juvenile| adult	NM_016206	GO:0006351	transcription, DNA-templated	inferred from electronic annotation	NM_016206	GO:0005634	nucleus	inferred from electronic annotation	NM_016206	GO:0008022	protein C-terminus binding	inferred from electronic annotation	NA	NA	NA	ENST00000383698	Pfam	IPR011520	Vestigial/tondu	2.89124	3.9672
TC0300011731.hg.1	5.15091	6.32303	-2.25343	down	CGGBP1	CGG triplet repeat binding protein 1	coding	chr3	-	NM_001008390	88051944	88149885	10	3p11.1	8545	NM_001008390	RefSeq	Homo sapiens CGG triplet repeat binding protein 1 (CGGBP1), transcript variant 1, mRNA.	chr3	100	100	0	NA	NM_001008390	Q9UFW8	NM_001008390	Hs.444818	adipose tissue| adrenal gland| ascites| bladder| blood| bone| bone marrow| brain| connective tissue| ear| embryonic tissue| eye| heart| intestine| kidney| larynx| liver| lung| lymph| lymph node| mammary gland| mouth| muscle| nerve| ovary| pancreas| parathyroid| placenta| prostate| salivary gland| skin| stomach| testis| thymus| thyroid| trachea| umbilical cord| uterus| vascular|adrenal tumor| blad…	NM_001008390	GO:0000122	negative regulation of transcription from RNA polymerase II promoter	inferred from direct assay	NM_001008390	GO:0005634	nucleus	inferred from direct assay	NM_001008390	GO:0000977	RNA polymerase II regulatory region sequence-specific DNA binding	inferred from mutant phenotype	NA	NA	NA	NA	NA	NA	NA	5.15091	6.32303
TC0300011801.hg.1	5.12111	5.72121	-1.51583	down	MINA	MYC induced nuclear antigen	coding	chr3	-	NM_001042533	97941817	97972457	10	3q11.2	84864	NM_001042533	RefSeq	Homo sapiens MYC induced nuclear antigen (MINA), transcript variant 1, mRNA.	chr3	100	100	0	NA	NM_001042533	Q8IUF8	NM_001042533	Hs.570562	adipose tissue| adrenal gland| ascites| bladder| blood| bone| bone marrow| brain| cervix| connective tissue| ear| embryonic tissue| esophagus| eye| intestine| kidney| larynx| liver| lung| lymph node| mammary gland| mouth| muscle| ovary| pancreas| parathyroid| placenta| prostate| skin| testis| thymus| thyroid| uterus|adrenal tumor| bladder carcinoma| breast (mammary gland) tumor| chondrosarcoma| c…	NM_001042533	GO:0000122	negative regulation of transcription from RNA polymerase II promoter	inferred from electronic annotation	NM_001042533	GO:0005634	nucleus	inferred from direct assay	NM_001042533	GO:0001191	transcriptional repressor activity, RNA polymerase II transcription factor binding	inferred from electronic annotation	NA	NA	NA	ENST00000333396	Pfam	IPR003347	JmjC domain	5.12111	5.72121
TC0300011842.hg.1	3.52398	4.37884	-1.80859	down	TOMM70A	translocase of outer mitochondrial membrane 70 homolog A (S. cerevisiae)	coding	chr3	-	NM_014820	100363431	100401398	10	3q12.2	9868	NM_014820	RefSeq	Homo sapiens translocase of outer mitochondrial membrane 70 homolog A (S. cerevisiae) (TOMM70A), mRNA.	chr3	100	100	0	NA	NM_014820	O94826	NM_014820	Hs.227253	adrenal gland| ascites| bladder| blood| bone| bone marrow| brain| cervix| connective tissue| embryonic tissue| esophagus| eye| heart| intestine| kidney| larynx| liver| lung| lymph| lymph node| mammary gland| mouth| muscle| ovary| pancreas| pharynx| pituitary gland| placenta| prostate| skin| stomach| testis| thymus| thyroid| trachea| uterus| vascular| bladder carcinoma| breast (mammary gland) tumo…	NM_014820	GO:0000423	macromitophagy	traceable author statement	NM_014820	GO:0005739	mitochondrion	inferred from direct assay	NM_014820	GO:0005515	protein binding	inferred from physical interaction	NA	NA	NA	ENST00000284320	Pfam	IPR019734	Tetratricopeptide repeat	3.52398	4.37884
TC0300011859.hg.1	2.3383	3.19228	-1.80749	down	ZBTB11	zinc finger and BTB domain containing 11	coding	chr3	-	NM_014415	101648889	101677495	10	3q12.3	27107	NM_014415	RefSeq	Homo sapiens zinc finger and BTB domain containing 11 (ZBTB11), mRNA.	chr3	100	100	0	NA	NM_014415	O95625	NM_014415	Hs.655286	adrenal gland| ascites| bladder| blood| bone marrow| brain| embryonic tissue| eye| heart| intestine| kidney| liver| lung| lymph node| mammary gland| mouth| muscle| nerve| ovary| pancreas| placenta| prostate| salivary gland| spleen| stomach| testis| thymus| thyroid| trachea| uterus| vascular|adrenal tumor| bladder carcinoma| breast (mammary gland) tumor| gastrointestinal tumor| germ cell tumor| gl…	NM_014415	GO:0006351	transcription, DNA-templated	inferred from electronic annotation	NM_014415	GO:0005654	nucleoplasm	inferred from direct assay	NM_014415	GO:0000977	RNA polymerase II regulatory region sequence-specific DNA binding	not recorded	NA	NA	NA	ENST00000312938	Pfam	IPR000210	BTB/POZ domain	2.3383	3.19228
TC0300011988.hg.1	1.17745	1.98389	-1.74888	down	GCSAM	germinal center-associated, signaling and motility	coding	chr3	-	NM_001190259	112120841	112133305	10	3q13.2	257144	NM_001190259	RefSeq	Homo sapiens germinal center-associated, signaling and motility (GCSAM), transcript variant 3, mRNA.	chr3	100	100	0	NA	NM_001190259	Q8N6F7	NM_001190259	Hs.49614	blood| lung| lymph| lymph node| mouth| pancreas| placenta| skin| spleen| testis| thymus| germ cell tumor| head and neck tumor| leukemia| lymphoma| normal| fetus| neonate| juvenile| adult	NM_001190259	GO:0050855	regulation of B cell receptor signaling pathway	inferred from mutant phenotype	NM_001190259	GO:0005737	cytoplasm	inferred from electronic annotation	NM_001190259	GO:0003779	actin binding	inferred from physical interaction	NA	NA	NA	NA	NA	NA	NA	1.17745	1.98389
TC0300012145.hg.1	6.44327	7.6642	-2.33097	down	FSTL1	follistatin like 1	coding	chr3	-	NM_007085	120392293	120451253	10	3q13.33	11167	NM_007085	RefSeq	Homo sapiens follistatin-like 1 (FSTL1), mRNA.	chr3	100	100	0	NA	NM_007085	Q12841	NM_007085	Hs.269512	adipose tissue| adrenal gland| ascites| bladder| bone| bone marrow| brain| cervix| connective tissue| ear| embryonic tissue| esophagus| eye| heart| intestine| kidney| larynx| liver| lung| lymph node| mammary gland| mouth| muscle| nerve| ovary| pancreas| parathyroid| pharynx| placenta| prostate| salivary gland| skin| spleen| stomach| testis| thymus| thyroid| trachea| umbilical cord| uterus| vascul…	NM_007085	GO:0030509	BMP signaling pathway	traceable author statement	NM_007085	GO:0005576	extracellular region	traceable author statement	NM_007085	GO:0005509	calcium ion binding	inferred from electronic annotation	NA	NA	NA	ENST00000295633	Pfam	IPR002350	Kazal domain	6.44327	7.6642
TC0300012189.hg.1	3.98747	4.8362	-1.80091	down	KPNA1	karyopherin alpha 1	coding	chr3	-	NM_002264	122421901	122514945	10	3q21	3836	NM_002264	RefSeq	Homo sapiens karyopherin alpha 1 (importin alpha 5) (KPNA1), transcript variant 1, mRNA.	chr3	100	100	0	NA	NM_002264	P52294	NM_002264	Hs.161008	adipose tissue| adrenal gland| ascites| bladder| blood| bone| bone marrow| brain| cervix| connective tissue| ear| embryonic tissue| esophagus| eye| heart| intestine| kidney| larynx| liver| lung| lymph| lymph node| mammary gland| mouth| muscle| ovary| pancreas| parathyroid| pharynx| pituitary gland| placenta| prostate| salivary gland| skin| spleen| stomach| testis| thymus| thyroid| trachea| uterus…	NA	NA	NA	NA	NM_002264	GO:0005634	nucleus	inferred from direct assay	NM_002264	GO:0005515	protein binding	inferred from physical interaction	NA	NA	NA	ENST00000344337	Pfam	IPR000225	Armadillo	3.98747	4.8362
TC0300012208.hg.1	5.37687	6.12396	-1.6784	down	HACD2	3-hydroxyacyl-CoA dehydratase 2	coding	chr3	-	NM_198402	123490820	123585185	10	3q21.1	201562	NM_198402	RefSeq	Homo sapiens 3-hydroxyacyl-CoA dehydratase 2 (HACD2), mRNA.	chr3	100	100	0	NA	NM_198402	Q6Y1H2	NM_198402	Hs.705480	bladder| blood| bone| bone marrow| brain| cervix| connective tissue| embryonic tissue| esophagus| eye| heart| intestine| kidney| liver| lung| lymph node| mammary gland| mouth| muscle| nerve| ovary| pancreas| parathyroid| pharynx| placenta| prostate| salivary gland| skin| spleen| stomach| testis| thymus| thyroid| trachea| uterus| vascular| bladder carcinoma| breast (mammary gland) tumor| cervical …	NM_198402	GO:0019432	triglyceride biosynthetic process	traceable author statement	NM_198402	GO:0005783	endoplasmic reticulum	inferred from direct assay	NM_198402	GO:0004725	protein tyrosine phosphatase activity	inferred from mutant phenotype	NA	NA	NA	ENST00000383657	Pfam	IPR007482	Protein-tyrosine phosphatase-like, PTPLA	5.37687	6.12396
TC0300012255.hg.1	2.33923	3.78462	-2.72337	down	OSBPL11	oxysterol binding protein-like 11	coding	chr3	-	NM_022776	125528858	125595537	10	3q21	114885	NM_022776	RefSeq	Homo sapiens oxysterol binding protein-like 11 (OSBPL11), mRNA.	chr3	100	100	0	NA	NM_022776	Q9BXB4	NM_022776	Hs.477440	ascites| bladder| blood| bone| brain| cervix| connective tissue| embryonic tissue| eye| heart| intestine| kidney| larynx| liver| lung| lymph node| mammary gland| mouth| muscle| ovary| pancreas| placenta| prostate| skin| spleen| stomach| testis| thymus| thyroid| uterus| vascular| bladder carcinoma| breast (mammary gland) tumor| cervical tumor| chondrosarcoma| colorectal tumor| gastrointestinal tum…	NM_022776	GO:0006869	lipid transport	inferred from electronic annotation	NM_022776	GO:0005794	Golgi apparatus	inferred from electronic annotation	NM_022776	GO:0008289	lipid binding	inferred from electronic annotation	NA	NA	NA	ENST00000296220	Pfam	IPR000648	Oxysterol-binding protein	2.33923	3.78462
TC0300012338.hg.1	2.16092	3.05778	-1.86201	down	DNAJB8	DnaJ (Hsp40) homolog, subfamily B, member 8	coding	chr3	-	NM_153330	128462432	128467248	10	3q21.3	165721	NM_153330	RefSeq	Homo sapiens DnaJ (Hsp40) homolog, subfamily B, member 8 (DNAJB8), mRNA.	chr3	100	100	0	NA	NM_153330	Q8NHS0	NM_153330	Hs.518241	blood| brain| testis| germ cell tumor| normal| fetus| adult	NM_153330	GO:0061077	chaperone-mediated protein folding	inferred from direct assay	NM_153330	GO:0005634	nucleus	inferred from direct assay	NM_153330	GO:0044183	protein binding involved in protein folding	inferred from direct assay	NA	NA	NA	ENST00000319153	Pfam	IPR001623	DnaJ domain	2.16092	3.05778
TC0300012384.hg.1	4.9214	4.26031	1.58129	up	H1FX	H1 histone family, member X	coding	chr3	-	NM_006026	129314771	129316391	10	3q21.3	8971	NM_006026	RefSeq	Homo sapiens H1 histone family, member X (H1FX), mRNA.	chr3	100	100	0	NA	NM_006026	Q92522	NM_006026	Hs.75307	adipose tissue| ascites| blood| bone| bone marrow| brain| cervix| connective tissue| embryonic tissue| esophagus| eye| heart| intestine| kidney| liver| lung| lymph| lymph node| mammary gland| muscle| nerve| ovary| pancreas| parathyroid| placenta| prostate| salivary gland| skin| stomach| testis| thymus| tonsil| uterus| breast (mammary gland) tumor| chondrosarcoma| colorectal tumor| esophageal tumo…	NM_006026	GO:0006334	nucleosome assembly	inferred from electronic annotation	NM_006026	GO:0000786	nucleosome	inferred from electronic annotation	NM_006026	GO:0003677	DNA binding	inferred from electronic annotation	NA	NA	NA	ENST00000333762	Pfam	IPR005818	Linker histone H1/H5, domain H15	4.9214	4.26031
TC0300012504.hg.1	2.1895	2.84359	-1.57362	down	KY	kyphoscoliosis peptidase	coding	chr3	-	NM_178554	134599923	134651636	10	3q22.2	339855	NM_178554	RefSeq	Homo sapiens kyphoscoliosis peptidase (KY), mRNA.	chr3	100	100	0	NA	NM_178554	Q8NBH2	NM_178554	Hs.146730	adrenal gland| blood| brain| embryonic tissue| eye| heart| kidney| larynx| muscle| ovary| prostate| stomach| testis| thymus| glioma| leukemia| normal| primitive neuroectodermal tumor of the CNS| blastocyst| fetus| adult	NM_178554	GO:0006508	proteolysis	inferred from electronic annotation	NM_178554	GO:0005856	cytoskeleton	inferred from electronic annotation	NM_178554	GO:0008233	peptidase activity	inferred from electronic annotation	NA	NA	NA	ENST00000423778	Pfam	IPR002931	Transglutaminase-like	2.1895	2.84359
TC0300012718.hg.1	7.42929	8.41344	-1.97814	down	PLOD2	procollagen-lysine, 2-oxoglutarate 5-dioxygenase 2	coding	chr3	-	NM_000935	146069440	146163653	10	3q24	5352	NM_000935	RefSeq	Homo sapiens procollagen-lysine, 2-oxoglutarate 5-dioxygenase 2 (PLOD2), transcript variant 2, mRNA.	chr3	100	100	0	NA	NM_000935	O00469	NM_000935	Hs.477866	adipose tissue| adrenal gland| bladder| blood| bone| bone marrow| brain| cervix| connective tissue| ear| embryonic tissue| esophagus| eye| heart| intestine| kidney| larynx| liver| lung| mammary gland| mouth| muscle| ovary| pancreas| pharynx| pituitary gland| placenta| prostate| skin| stomach| testis| thymus| thyroid| trachea| uterus| vascular|adrenal tumor| bladder carcinoma| breast (mammary glan…	NM_000935	GO:0001666	response to hypoxia	inferred from expression pattern	NM_000935	GO:0005783	endoplasmic reticulum	traceable author statement	NM_000935	GO:0005506	iron ion binding	inferred from electronic annotation	NA	NA	NA	ENST00000282903	Pfam	IPR005123	Oxoglutarate/iron-dependent dioxygenase	7.42929	8.41344
TC0300012764.hg.1	2.08438	3.61467	-2.88844	down	HLTF	helicase-like transcription factor	coding	chr3	-	NM_003071	149030117	149086554	10	3q25.1-q26.1	6596	NM_003071	RefSeq	Homo sapiens helicase-like transcription factor (HLTF), transcript variant 1, mRNA.	chr3	100	100	0	NA	NM_003071	Q14527	NM_003071	Hs.3068	adrenal gland| bladder| blood| bone| bone marrow| brain| cervix| connective tissue| embryonic tissue| eye| heart| intestine| kidney| liver| lung| lymph node| mammary gland| mouth| muscle| nerve| ovary| pancreas| parathyroid| pituitary gland| placenta| prostate| skin| testis| thymus| trachea| uterus|adrenal tumor| bladder carcinoma| breast (mammary gland) tumor| cervical tumor| chondrosarcoma| col…	NM_003071	GO:0000209	protein polyubiquitination	inferred from electronic annotation	NM_003071	GO:0005634	nucleus	inferred from direct assay	NA	NA	NA	NA	NA	NA	NA	ENST00000310053	Pfam	IPR000330	SNF2-related, N-terminal domain	2.08438	3.61467
TC0300012770.hg.1	7.88395	6.59312	2.44669	up	TM4SF18	transmembrane 4 L six family member 18	coding	chr3	-	NM_001184723	149318498	149334414	10	3q25.1	116441	NM_001184723	RefSeq	Homo sapiens transmembrane 4 L six family member 18 (TM4SF18), transcript variant 2, mRNA.	chr3	100	100	0	NA	NM_001184723	Q96CE8	NM_001184723	Hs.22026	ascites| bladder| bone marrow| brain| connective tissue| embryonic tissue| eye| intestine| kidney| liver| lung| mammary gland| mouth| pancreas| parathyroid| pharynx| placenta| prostate| spleen| stomach| testis| thyroid| trachea| umbilical cord| uterus| vascular| bladder carcinoma| breast (mammary gland) tumor| gastrointestinal tumor| glioma| kidney tumor| leukemia| non-neoplasia| normal| pancreat…	NA	NA	NA	NA	NM_001184723	GO:0016021	integral component of membrane	not recorded	NA	NA	NA	NA	NA	NA	NA	ENST00000296059	Pfam	IPR008661	L6 membrane	7.88395	6.59312
TC0300012970.hg.1	4.8852	5.84544	-1.94564	down	KPNA4	karyopherin alpha 4 (importin alpha 3)	coding	chr3	-	NM_002268	160494995	160565588	10	3q25.33	3840	NM_002268	RefSeq	Homo sapiens karyopherin alpha 4 (importin alpha 3) (KPNA4), mRNA.	chr3	100	100	0	NA	NM_002268	O00629	NM_002268	Hs.467866	adipose tissue| adrenal gland| ascites| bladder| blood| bone| bone marrow| brain| cervix| connective tissue| ear| embryonic tissue| esophagus| eye| heart| intestine| kidney| larynx| liver| lung| lymph| lymph node| mammary gland| mouth| muscle| nerve| ovary| pancreas| parathyroid| pharynx| pituitary gland| placenta| prostate| skin| spleen| stomach| testis| thymus| thyroid| trachea| uterus| vascula…	NM_002268	GO:0006607	NLS-bearing protein import into nucleus	traceable author statement	NM_002268	GO:0005643	nuclear pore	not recorded	NM_002268	GO:0005515	protein binding	inferred from physical interaction	NA	NA	NA	ENST00000334256	Pfam	IPR000225	Armadillo	4.8852	5.84544
TC0300013104.hg.1	3.87028	4.76266	-1.85624	down	EIF5A2	eukaryotic translation initiation factor 5A2	coding	chr3	-	NM_020390	170888415	170908693	10	3q26.2	56648	NM_020390	RefSeq	Homo sapiens eukaryotic translation initiation factor 5A2 (EIF5A2), mRNA.	chr3	100	100	0	NA	NM_020390	Q9GZV4	NM_020390	Hs.164144	blood| bone| brain| connective tissue| ear| embryonic tissue| eye| kidney| lung| pancreas| pharynx| pituitary gland| placenta| prostate| salivary gland| skin| stomach| testis| uterus| vascular| germ cell tumor| kidney tumor| leukemia| lung tumor| non-neoplasia| normal| primitive neuroectodermal tumor of the CNS| prostate cancer| skin tumor| soft tissue/muscle tissue tumor| fetus| juvenile| adult	NM_020390	GO:0006452	translational frameshifting	inferred from electronic annotation	NM_020390	GO:0005643	nuclear pore	inferred from electronic annotation	NM_020390	GO:0003746	translation elongation factor activity	inferred from electronic annotation	NA	NA	NA	ENST00000295822	Pfam	IPR020189	Translation elongation factor, IF5A C-terminal	3.87028	4.76266
TC0300013108.hg.1	2.07154	3.44812	-2.59653	down	TNIK	TRAF2 and NCK interacting kinase	coding	chr3	-	NM_001161560	171061339	171460408	10	3q26.31	23043	NM_001161560	RefSeq	Homo sapiens TRAF2 and NCK interacting kinase (TNIK), transcript variant 2, mRNA.	chr3	100	100	0	NA	NM_001161560	Q9UKE5	NM_001161560	Hs.34024	ascites| blood| bone| brain| connective tissue| embryonic tissue| intestine| kidney| liver| lung| lymph node| mammary gland| muscle| pancreas| placenta| prostate| skin| spleen| testis| thyroid| uterus| vascular| chondrosarcoma| colorectal tumor| gastrointestinal tumor| germ cell tumor| glioma| head and neck tumor| liver tumor| normal| primitive neuroectodermal tumor of the CNS| prostate cancer| s…	NA	NA	NA	NA	NA	NA	NA	NA	NA	NA	NA	NA	NA	NA	NA	ENST00000284483	Pfam	IPR000719	Protein kinase domain	2.07154	3.44812
TC0300013146.hg.1	6.57083	5.8552	1.6422	up	TNFSF10	tumor necrosis factor (ligand) superfamily, member 10	coding	chr3	-	NM_001190942	172505508	172523507	10	3q26	8743	NM_001190942	RefSeq	Homo sapiens tumor necrosis factor (ligand) superfamily, member 10 (TNFSF10), transcript variant 2, mRNA.	chr3	100	100	0	NA	NM_001190942	P50591	NM_001190942	Hs.478275	adrenal gland| bladder| blood| bone marrow| brain| cervix| connective tissue| ear| esophagus| eye| heart| intestine| kidney| larynx| liver| lung| lymph| lymph node| mammary gland| mouth| muscle| ovary| pancreas| parathyroid| pharynx| placenta| prostate| skin| spleen| stomach| testis| thymus| thyroid| trachea| umbilical cord| uterus| vascular|adrenal tumor| breast (mammary gland) tumor| cervical t…	NM_001190942	GO:0006915	apoptotic process	traceable author statement	NM_001190942	GO:0005576	extracellular region	traceable author statement	NM_001190942	GO:0005102	receptor binding	traceable author statement	NM_001190942	GenMAPP	Apoptosis	ENST00000241261	Pfam	IPR006052	Tumour necrosis factor domain	6.57083	5.8552
TC0300013151.hg.1	4.18183	5.2867	-2.15079	down	NCEH1	neutral cholesterol ester hydrolase 1	coding	chr3	-	NM_001146276	172630249	172711218	10	3q26.31	57552	NM_001146276	RefSeq	Homo sapiens neutral cholesterol ester hydrolase 1 (NCEH1), transcript variant 1, mRNA.	chr3	100	100	0	NA	NM_001146276	Q6PIU2	NM_001146276	Hs.444099	bladder| bone| brain| connective tissue| embryonic tissue| eye| intestine| kidney| liver| lung| mammary gland| mouth| muscle| ovary| pancreas| pharynx| placenta| prostate| stomach| testis| trachea| uterus| vascular| bladder carcinoma| breast (mammary gland) tumor| chondrosarcoma| colorectal tumor| gastrointestinal tumor| germ cell tumor| glioma| head and neck tumor| kidney tumor| leukemia| liver …	NM_001146276	GO:0016042	lipid catabolic process	inferred from electronic annotation	NM_001146276	GO:0005783	endoplasmic reticulum	inferred from electronic annotation	NM_001146276	GO:0052689	carboxylic ester hydrolase activity	inferred from electronic annotation	NA	NA	NA	ENST00000424772	Pfam	IPR013094	Alpha/beta hydrolase fold-3	4.18183	5.2867
TC0300013215.hg.1	2.42832	3.05506	-1.54407	down	TBL1XR1	transducin (beta)-like 1 X-linked receptor 1	coding	chr3	-	NM_024665	177019355	177197396	10	3q26.32	79718	NM_024665	RefSeq	Homo sapiens transducin (beta)-like 1 X-linked receptor 1 (TBL1XR1), mRNA.	chr3	100	100	0	NA	NM_024665	Q9BZK7	NA	NA	NA	NA	NA	NA	NA	NA	NA	NA	NA	NA	NA	NA	NA	NA	NA	NA	ENST00000352800	Pfam	IPR006594	LIS1 homology motif	2.42832	3.05506
TC0300013334.hg.1	4.27315	4.92597	-1.57224	down	MCCC1	methylcrotonoyl-CoA carboxylase 1	coding	chr3	-	NM_001293273	183015218	183116075	10	3q27	56922	NM_001293273	RefSeq	Homo sapiens methylcrotonoyl-CoA carboxylase 1 (alpha) (MCCC1), transcript variant 2, mRNA.	chr3	100	100	0	NA	NM_001293273	Q96RQ3	NM_001293273	Hs.47649	adipose tissue| adrenal gland| ascites| bladder| blood| bone| bone marrow| brain| cervix| connective tissue| embryonic tissue| esophagus| eye| heart| intestine| kidney| larynx| liver| lung| lymph| lymph node| mammary gland| mouth| muscle| ovary| pancreas| parathyroid| placenta| prostate| skin| spleen| stomach| testis| thymus| trachea| uterus|adrenal tumor| breast (mammary gland) tumor| chondrosar…	NA	NA	NA	NA	NM_001293273	GO:0005739	mitochondrion	inferred from direct assay	NA	NA	NA	NA	NA	NA	NA	ENST00000265594	Pfam	IPR000089	Biotin/lipoyl attachment	4.27315	4.92597
TC0300013357.hg.1	5.84876	6.75341	-1.87208	down	PARL	presenilin associated, rhomboid-like	coding	chr3	-	NM_001037639	183829385	183884933	10	3q27.1	55486	NM_001037639	RefSeq	Homo sapiens presenilin associated, rhomboid-like (PARL), transcript variant 2, mRNA.	chr3	100	100	0	NA	NM_001037639	Q9H300	NM_001037639	Hs.478469	adrenal gland| ascites| blood| bone| bone marrow| brain| connective tissue| embryonic tissue| eye| heart| intestine| kidney| larynx| liver| lung| lymph| lymph node| mammary gland| muscle| nerve| ovary| pancreas| parathyroid| pharynx| placenta| prostate| salivary gland| skin| spleen| stomach| testis| thyroid| tonsil| uterus| vascular|adrenal tumor| breast (mammary gland) tumor| chondrosarcoma| col…	NA	NA	NA	NA	NM_001037639	GO:0005634	nucleus	inferred from electronic annotation	NM_001037639	GO:0004175	endopeptidase activity	inferred from genetic interaction	NA	NA	NA	ENST00000311101	Pfam	IPR022764	Peptidase S54, rhomboid domain	5.84876	6.75341
TC0300013360.hg.1	1.86084	2.55918	-1.62264	down	ABCC5	ATP binding cassette subfamily C member 5	coding	chr3	-	NM_001023587	183919934	184018015	10	3q27	10057	NM_001023587	RefSeq	Homo sapiens ATP-binding cassette, sub-family C (CFTR/MRP), member 5 (ABCC5), transcript variant 2, mRNA.	chr3	100	100	0	NA	NM_001023587	O15440	NM_001023587	Hs.743953	ascites| bladder| blood| bone| bone marrow| brain| connective tissue| embryonic tissue| esophagus| eye| intestine| kidney| larynx| liver| lung| lymph node| mammary gland| mouth| muscle| nerve| ovary| pancreas| parathyroid| pharynx| pituitary gland| placenta| prostate| skin| spleen| stomach| testis| thymus| trachea| umbilical cord| uterus| bladder carcinoma| breast (mammary gland) tumor| chondrosa…	NM_001023587	GO:0005975	carbohydrate metabolic process	traceable author statement	NM_001023587	GO:0005886	plasma membrane	traceable author statement	NM_001023587	GO:0005524	ATP binding	inferred from electronic annotation	NA	NA	NA	ENST00000265586	Pfam	IPR003439	ABC transporter-like	1.86084	2.55918
TC0300013461.hg.1	1.58156	3.20306	-3.07695	down	MASP1	mannan-binding lectin serine peptidase 1 (C4/C2 activating component of Ra-reactive factor)	coding	chr3	-	NM_001031849	187216085	187292022	10	3q27-q28	5648	NM_001031849	RefSeq	Homo sapiens mannan-binding lectin serine peptidase 1 (C4/C2 activating component of Ra-reactive factor) (MASP1), transcript variant 3, mRNA.	chr3	100	100	0	NA	NM_001031849	P48740	NM_001031849	Hs.89983	bone| brain| connective tissue| heart| intestine| kidney| liver| lung| mouth| muscle| pharynx| placenta| prostate| skin| spleen| testis| thymus| trachea| uterus| chondrosarcoma| colorectal tumor| germ cell tumor| glioma| liver tumor| normal| soft tissue/muscle tissue tumor| uterine tumor| fetus| neonate| infant| adult	NA	NA	NA	NA	NM_001031849	GO:0005576	extracellular region	traceable author statement	NA	NA	NA	NA	NM_001031849	GenMAPP	Complement_Activation_Classical	ENST00000169293	Pfam	IPR000436	Sushi/SCR/CCP domain	1.58156	3.20306
TC0300013513.hg.1	1.59731	2.45921	-1.81743	down	P3H2	prolyl 3-hydroxylase 2	coding	chr3	-	NM_001134418	189956728	190122437	10	3q28	55214	NM_001134418	RefSeq	Homo sapiens prolyl 3-hydroxylase 2 (P3H2), transcript variant 2, mRNA.	chr3	100	100	0	NA	NM_001134418	Q8IVL5	NM_001134418	Hs.374191	adrenal gland| bladder| bone| brain| connective tissue| embryonic tissue| eye| heart| intestine| kidney| liver| lung| mammary gland| mouth| muscle| ovary| pancreas| placenta| prostate| skin| spleen| stomach| testis| thymus| thyroid| uterus|adrenal tumor| breast (mammary gland) tumor| chondrosarcoma| colorectal tumor| gastrointestinal tumor| germ cell tumor| glioma| head and neck tumor| kidney tum…	NM_001134418	GO:0008285	negative regulation of cell proliferation	inferred from direct assay	NM_001134418	GO:0005604	basement membrane	inferred from sequence or structural similarity	NM_001134418	GO:0005506	iron ion binding	inferred from electronic annotation	NA	NA	NA	ENST00000319332	Pfam	IPR005123	Oxoglutarate/iron-dependent dioxygenase	1.59731	2.45921
TC0300013609.hg.1	6.70726	7.42169	-1.64083	down	LSG1	large 60S subunit nuclear export GTPase 1	coding	chr3	-	NM_018385	194640788	194672477	10	3q29	55341	NM_018385	RefSeq	Homo sapiens large 60S subunit nuclear export GTPase 1 (LSG1), mRNA.	chr3	100	100	0	NA	NM_018385	Q9H089	NM_018385	Hs.744061	ascites| blood| bone| brain| cervix| connective tissue| ear| embryonic tissue| esophagus| eye| heart| intestine| kidney| liver| lung| lymph| lymph node| mammary gland| mouth| muscle| ovary| pancreas| pharynx| placenta| prostate| skin| spleen| stomach| testis| thymus| thyroid| tonsil| trachea| uterus| vascular| breast (mammary gland) tumor| cervical tumor| chondrosarcoma| colorectal tumor| esophag…	NM_018385	GO:0008152	metabolic process	inferred from electronic annotation	NM_018385	GO:0005634	nucleus	inferred from direct assay	NM_018385	GO:0003924	GTPase activity	inferred from direct assay	NA	NA	NA	ENST00000265245	Pfam	IPR006073	GTP binding domain	6.70726	7.42169
TC0300013684.hg.1	5.15564	5.77223	-1.53324	down	TFRC	transferrin receptor	coding	chr3	-	NM_001128148	196027183	196082189	10	3q29	7037	NM_001128148	RefSeq	Homo sapiens transferrin receptor (TFRC), transcript variant 2, mRNA.	chr3	100	100	0	NA	NM_001128148	P02786	NM_001128148	Hs.529618	adrenal gland| ascites| bladder| blood| bone| bone marrow| brain| cervix| connective tissue| ear| embryonic tissue| esophagus| eye| heart| intestine| kidney| larynx| liver| lung| lymph| lymph node| mammary gland| mouth| muscle| nerve| ovary| pancreas| parathyroid| pharynx| pituitary gland| placenta| prostate| skin| spleen| stomach| testis| thymus| thyroid| trachea| umbilical cord| uterus| vascula…	NA	NA	NA	NA	NA	NA	NA	NA	NA	NA	NA	NA	NA	NA	NA	ENST00000360110	Pfam	IPR003137	PA domain	5.15564	5.77223
TC0300013822.hg.1	4.99496	5.73465	-1.66982	down	EXOSC7	exosome component 7	coding	chr3	+	NM_015004	44975241	45012752	10	3p21.31	23016	NM_015004	RefSeq	Homo sapiens exosome component 7 (EXOSC7), transcript variant 1, mRNA.	chr3	100	100	0	NA	NM_015004	Q15024	NM_015004	Hs.719958	adrenal gland| ascites| bladder| blood| bone| bone marrow| brain| cervix| connective tissue| ear| embryonic tissue| eye| heart| intestine| kidney| liver| lung| lymph| lymph node| mammary gland| mouth| muscle| ovary| pancreas| parathyroid| pharynx| pituitary gland| placenta| prostate| salivary gland| skin| spleen| stomach| testis| thymus| thyroid| tonsil| trachea| uterus| bladder carcinoma| breast…	NA	NA	NA	NA	NM_015004	GO:0000176	nuclear exosome (RNase complex)	not recorded	NM_015004	GO:0000175	3'-5'-exoribonuclease activity	traceable author statement	NA	NA	NA	ENST00000265564	Pfam	IPR001247	Exoribonuclease, phosphorolytic domain 1	4.99496	5.73465
TC0300013864.hg.1	3.66961	4.27367	-1.51999	down	PDIA5	protein disulfide isomerase family A, member 5	coding	chr3	+	NM_006810	123067009	123162106	10	3q21.1	10954	NM_006810	RefSeq	Homo sapiens protein disulfide isomerase family A, member 5 (PDIA5), transcript variant 1, mRNA.	chr3	100	100	0	NA	NM_006810	Q14554	NM_006810	Hs.477352	adrenal gland| ascites| blood| bone| brain| cervix| connective tissue| embryonic tissue| esophagus| eye| heart| intestine| kidney| liver| lung| lymph| lymph node| mammary gland| muscle| ovary| pancreas| pituitary gland| placenta| prostate| skin| spleen| stomach| testis| thyroid| trachea| uterus| vascular| bladder carcinoma| breast (mammary gland) tumor| cervical tumor| chondrosarcoma| colorectal …	NM_006810	GO:0006457	protein folding	traceable author statement	NM_006810	GO:0005788	endoplasmic reticulum lumen	traceable author statement	NM_006810	GO:0003756	protein disulfide isomerase activity	traceable author statement	NA	NA	NA	ENST00000316218	Pfam	IPR013766	Thioredoxin domain	3.66961	4.27367
TC0300013874.hg.1	5.57497	6.35085	-1.71224	down	SRPRB	signal recognition particle receptor, B subunit	coding	chr3	+	NM_021203	133784033	133821492	10	3q22.1	58477	NM_021203	RefSeq	Homo sapiens signal recognition particle receptor, B subunit (SRPRB), mRNA.	chr3	100	100	0	NA	NM_021203	Q9Y5M8	NM_021203	Hs.12152	adrenal gland| ascites| bladder| blood| bone| bone marrow| brain| cervix| connective tissue| embryonic tissue| esophagus| eye| heart| intestine| kidney| larynx| liver| lung| lymph| lymph node| mammary gland| mouth| muscle| ovary| pancreas| parathyroid| pharynx| pituitary gland| placenta| prostate| salivary gland| skin| stomach| testis| thymus| thyroid| trachea| umbilical cord| uterus| vascular|ad…	NM_021203	GO:0006412	translation	traceable author statement	NM_021203	GO:0005737	cytoplasm	inferred from direct assay	NM_021203	GO:0005525	GTP binding	inferred from electronic annotation	NA	NA	NA	ENST00000466490	Pfam	IPR019009	Signal recognition particle receptor, beta subunit	5.57497	6.35085
TC0300013896.hg.1	6.35008	7.1313	-1.71859	down	MFSD1	major facilitator superfamily domain containing 1	coding	chr3	+	NM_001167903	158801865	158829719	10	3q25.32	64747	NM_001167903	RefSeq	Homo sapiens major facilitator superfamily domain containing 1 (MFSD1), transcript variant 2, mRNA.	chr3	100	100	0	NA	NM_001167903	Q9H3U5	NM_001167903	Hs.58663	adrenal gland| ascites| bladder| blood| bone| bone marrow| brain| connective tissue| ear| embryonic tissue| esophagus| eye| heart| intestine| kidney| liver| lung| lymph node| mammary gland| mouth| muscle| nerve| ovary| pancreas| pharynx| placenta| prostate| skin| spleen| stomach| testis| thymus| trachea| uterus| vascular|adrenal tumor| breast (mammary gland) tumor| chondrosarcoma| colorectal tumo…	NM_001167903	GO:0055085	transmembrane transport	inferred from electronic annotation	NM_001167903	GO:0016021	integral component of membrane	inferred from electronic annotation	ENST00000264266	GO:0022891	substrate-specific transmembrane transporter activity	NA	NA	NA	NA	ENST00000264266	Pfam	IPR011701	Major facilitator superfamily	6.35008	7.1313
TC0300013930.hg.1	2.20728	2.97335	-1.70063	down	SSUH2	ssu-2 homolog (C. elegans)	coding	chr3	-	NM_001256748	8619400	8682079	10	3p26.1	51066	NM_001256748	RefSeq	Homo sapiens ssu-2 homolog (C. elegans) (SSUH2), transcript variant 1, mRNA.	chr3	100	100	0	NA	NM_001256748	Q9Y2M2	NM_001256748	Hs.740735	brain| embryonic tissue| intestine| liver| placenta| spleen| testis| trachea| colorectal tumor| liver tumor| normal| primitive neuroectodermal tumor of the CNS|embryoid body| fetus| adult	NA	NA	NA	NA	NM_001256748	GO:0005737	cytoplasm	inferred from direct assay	NA	NA	NA	NA	NA	NA	NA	NA	NA	NA	NA	2.20728	2.97335
TC0300013932.hg.1	2.29875	3.20377	-1.87257	down	SRGAP3	SLIT-ROBO Rho GTPase activating protein 3	coding	chr3	-	NM_001033117	8980591	9249685	10	3p25.3	9901	NM_001033117	RefSeq	Homo sapiens SLIT-ROBO Rho GTPase activating protein 3 (SRGAP3), transcript variant 2, mRNA.	chr3	100	100	0	NA	NM_001033117	O43295	NM_001033117	Hs.654743	brain| connective tissue| embryonic tissue| eye| intestine| kidney| liver| lung| mammary gland| mouth| muscle| nerve| ovary| placenta| prostate| skin| testis| thymus| trachea| umbilical cord| uterus| breast (mammary gland) tumor| chondrosarcoma| germ cell tumor| glioma| head and neck tumor| kidney tumor| liver tumor| lung tumor| non-neoplasia| normal| primitive neuroectodermal tumor of the CNS| p…	NM_001033117	GO:0007264	small GTPase mediated signal transduction	traceable author statement	NM_001033117	GO:0005737	cytoplasm	not recorded	NM_001033117	GO:0005096	GTPase activator activity	not recorded	NA	NA	NA	ENST00000360413	Pfam	IPR000198	Rho GTPase-activating protein domain	2.29875	3.20377
TC0300013948.hg.1	3.67115	4.56436	-1.85731	down	TBC1D5	TBC1 domain family, member 5	coding	chr3	-	NM_001134381	17157162	17742748	10	3p24.3	9779	NM_001134381	RefSeq	Homo sapiens TBC1 domain family, member 5 (TBC1D5), transcript variant 1, mRNA.	chr3	100	100	0	NA	NM_001134381	Q92609	NA	NA	NA	NA	NA	NA	NA	NA	NA	NA	NA	NM_001134381	GO:0005096	GTPase activator activity	inferred from electronic annotation	NA	NA	NA	ENST00000253692	Pfam	IPR000195	Rab-GTPase-TBC domain	3.67115	4.56436
TC0300013963.hg.1	1.52629	2.29998	-1.70964	down	ANO10	anoctamin 10	coding	chr3	-	ENST00000486959	43636309	43691572	10	3p22.1	55129	ENST00000486959	ENSEMBL	anoctamin 10 [gene_biotype:protein_coding transcript_biotype:processed_transcript]	chr3	100	100	0	NA	ENST00000486959	Q9NW15	ENST00000486959	Hs.656657	adipose tissue| bladder| blood| bone| bone marrow| brain| connective tissue| embryonic tissue| esophagus| eye| heart| intestine| kidney| larynx| liver| lung| lymph node| mammary gland| mouth| muscle| nerve| ovary| pancreas| parathyroid| pituitary gland| placenta| prostate| salivary gland| skin| spleen| stomach| testis| thymus| thyroid| trachea| uterus| vascular| breast (mammary gland) tumor| chon…	ENST00000486959	GO:0006812	cation transport	inferred from direct assay	ENST00000486959	GO:0005622	intracellular	inferred from direct assay	ENST00000486959	GO:0005227	calcium activated cation channel activity	inferred from direct assay	NA	NA	NA	NA	NA	NA	NA	1.52629	2.29998
TC0300013972.hg.1	3.02021	3.81496	-1.73478	down	SLC26A6	solute carrier family 26 (anion exchanger), member 6	coding	chr3	-	NM_001040454	48625723	48635493	10	3p21.3	65010	NM_001040454	RefSeq	Homo sapiens solute carrier family 26 (anion exchanger), member 6 (SLC26A6), transcript variant 4, mRNA.	chr3	100	100	0	NA	NM_001040454	Q9BXS9	NA	NA	NA	NA	NA	NA	NA	NA	NA	NA	NA	NA	NA	NA	NA	NA	NA	NA	ENST00000337000	Pfam	IPR002645	STAS domain	3.02021	3.81496
TC0300013985.hg.1	6.61523	5.96154	1.57319	up	TUSC2	tumor suppressor candidate 2	coding	chr3	-	NM_007275	50324907	50328251	10	3p21.3	11334	NM_007275	RefSeq	Homo sapiens tumor suppressor candidate 2 (TUSC2), mRNA.	chr3	100	100	0	NA	NM_007275	O75896	NM_007275	Hs.517981	ascites| blood| bone| brain| cervix| connective tissue| embryonic tissue| eye| heart| intestine| kidney| liver| lung| lymph| lymph node| mammary gland| muscle| ovary| pancreas| pituitary gland| placenta| prostate| salivary gland| skin| testis| thyroid| uterus| breast (mammary gland) tumor| cervical tumor| chondrosarcoma| colorectal tumor| gastrointestinal tumor| germ cell tumor| glioma| head and …	NM_007275	GO:0001779	natural killer cell differentiation	inferred from electronic annotation	NM_007275	GO:0005739	mitochondrion	inferred from electronic annotation	NM_007275	GO:0005515	protein binding	inferred from physical interaction	NA	NA	NA	ENST00000232496	Pfam	IPR029393	Tumour suppressor candidate 2	6.61523	5.96154
TC0300014043.hg.1	4.92061	6.29754	-2.59715	down	ISY1	ISY1 splicing factor homolog	coding	chr3	-	NM_001199469	129127415	129161293	10	3q21.3	57461	NM_001199469	RefSeq	Homo sapiens ISY1 splicing factor homolog (ISY1), transcript variant 1, mRNA.	chr3	100	100	0	NA	NM_001199469	Q9ULR0	NM_001199469	Hs.512661	adipose tissue| adrenal gland| blood| bone| brain| cervix| connective tissue| embryonic tissue| esophagus| eye| heart| intestine| kidney| larynx| liver| lung| lymph| lymph node| mammary gland| mouth| muscle| ovary| pancreas| placenta| prostate| salivary gland| skin| spleen| stomach| testis| thymus| thyroid| tonsil| umbilical cord| uterus| vascular| breast (mammary gland) tumor| cervical tumor| ch…	NM_001199469	GO:0000350	generation of catalytic spliceosome for second transesterification step	not recorded	NM_001199469	GO:0000974	Prp19 complex	not recorded	NM_001199469	GO:0000384	first spliceosomal transesterification activity	not recorded	NA	NA	NA	ENST00000273541	Pfam	IPR009360	Isy1-like splicing	4.92061	6.29754
TC0300014047.hg.1	3.99147	5.43631	-2.72233	down	ISY1-RAB43	ISY1-RAB43 readthrough	coding	chr3	-	NM_001204890	129087569	129161230	10	3q	100534599	NM_001204890	RefSeq	Homo sapiens ISY1-RAB43 readthrough (ISY1-RAB43), mRNA.	chr3	100	100	0	NA	NM_001204890	Q9ULR0	NM_001204890	Hs.512661	adipose tissue| adrenal gland| blood| bone| brain| cervix| connective tissue| embryonic tissue| esophagus| eye| heart| intestine| kidney| larynx| liver| lung| lymph| lymph node| mammary gland| mouth| muscle| ovary| pancreas| placenta| prostate| salivary gland| skin| spleen| stomach| testis| thymus| thyroid| tonsil| umbilical cord| uterus| vascular| breast (mammary gland) tumor| cervical tumor| ch…	NM_001204890	GO:0000350	generation of catalytic spliceosome for second transesterification step	NA	NM_001204890	GO:0000974	Prp19 complex	NA	NM_001204890	GO:0000384	first spliceosomal transesterification activity	NA	NA	NA	NA	ENST00000418265	Pfam	IPR009360	Isy1-like splicing	3.99147	5.43631
TC0300014053.hg.1	2.18334	3.18652	-2.0044	down	PIK3CB	phosphatidylinositol-4,5-bisphosphate 3-kinase, catalytic subunit beta	coding	chr3	-	NM_001256045	138652698	138714719	10	3q22.3	5291	NM_001256045	RefSeq	Homo sapiens phosphatidylinositol-4,5-bisphosphate 3-kinase, catalytic subunit beta (PIK3CB), transcript variant 2, mRNA.	chr3	100	100	0	NA	NM_001256045	P42338	NM_001256045	Hs.239818	ascites| bladder| blood| bone| bone marrow| brain| cervix| connective tissue| embryonic tissue| eye| intestine| kidney| liver| lung| lymph node| mammary gland| mouth| muscle| ovary| pancreas| parathyroid| pharynx| pituitary gland| placenta| prostate| salivary gland| skin| stomach| testis| thyroid| uterus| vascular| breast (mammary gland) tumor| cervical tumor| chondrosarcoma| colorectal tumor| ga…	NA	NA	NA	NA	NM_001256045	GO:0005634	nucleus	inferred from direct assay	NM_001256045	GO:0005515	protein binding	inferred from physical interaction	NM_001256045	GenMAPP	G13_Signaling_Pathway	ENST00000493568	Pfam	IPR000403	Phosphatidylinositol 3-/4-kinase, catalytic domain	2.18334	3.18652
TC0300014064.hg.1	6.41555	7.16687	-1.68334	down	PFN2	profilin 2	coding	chr3	-	NM_002628	149964904	150050788	10	3q25.1	5217	NM_002628	RefSeq	Homo sapiens profilin 2 (PFN2), transcript variant 2, mRNA.	chr3	100	100	0	NA	NM_002628	P35080	NA	NA	NA	NA	NA	NA	NA	NM_002628	GO:0005737	cytoplasm	not recorded	NM_002628	GO:0000774	adenyl-nucleotide exchange factor activity	inferred from direct assay	NA	NA	NA	ENST00000239940	Pfam	IPR005455	Profilin	6.41555	7.16687
TC0300014075.hg.1	5.42349	6.22791	-1.74644	down	TRIM59	tripartite motif containing 59	coding	chr3	-	NM_173084	160432445	160485773	10	3q25.33	286827	NM_173084	RefSeq	Homo sapiens tripartite motif containing 59 (TRIM59), mRNA.	chr3	100	100	0	NA	NM_173084	Q8IWR1	NM_173084	Hs.212957	adrenal gland| ascites| bladder| blood| bone| bone marrow| brain| cervix| connective tissue| embryonic tissue| eye| heart| intestine| kidney| liver| lung| lymph node| mammary gland| mouth| muscle| ovary| pancreas| pharynx| pituitary gland| placenta| prostate| skin| stomach| testis| thymus| thyroid| uterus| vascular|adrenal tumor| bladder carcinoma| breast (mammary gland) tumor| cervical tumor| ch…	NM_173084	GO:0043124	negative regulation of I-kappaB kinase/NF-kappaB signaling	inferred from mutant phenotype	NM_173084	GO:0005783	endoplasmic reticulum	inferred from sequence or structural similarity	NM_173084	GO:0005515	protein binding	inferred from physical interaction	NA	NA	NA	ENST00000309784	Pfam	IPR000315	B-box-type zinc finger	5.42349	6.22791
TC0300014085.hg.1	3.26557	4.15532	-1.85285	down	TBCCD1	TBCC domain containing 1	coding	chr3	-	NM_001134415	186546067	186570543	10	3q27.3	55171	NM_001134415	RefSeq	Homo sapiens TBCC domain containing 1 (TBCCD1), transcript variant 1, mRNA.	chr3	100	100	0	NA	NM_001134415	Q9NVR7	NM_001134415	Hs.518469	ascites| blood| bone| bone marrow| brain| cervix| embryonic tissue| esophagus| heart| intestine| kidney| liver| lung| mouth| muscle| pancreas| placenta| skin| spleen| stomach| testis| thymus| thyroid| trachea| uterus| vascular| cervical tumor| colorectal tumor| esophageal tumor| gastrointestinal tumor| germ cell tumor| glioma| head and neck tumor| leukemia| liver tumor| lung tumor| normal| pancre…	NM_001134415	GO:0000902	cell morphogenesis	inferred from electronic annotation	NM_001134415	GO:0005737	cytoplasm	inferred from electronic annotation	NM_001134415	GO:0003779	actin binding	inferred from electronic annotation	NA	NA	NA	ENST00000338733	Pfam	IPR012945	Tubulin binding cofactor C-like domain	3.26557	4.15532
TC0300014090.hg.1	5.33098	6.29229	-1.94707	down	ATP13A3	ATPase type 13A3	coding	chr3	-	NM_024524	194402674	194486659	10	3q29	79572	NM_024524	RefSeq	Homo sapiens ATPase type 13A3 (ATP13A3), mRNA.	chr3	100	100	0	NA	NM_024524	Q9H7F0	NM_024524	Hs.529609	adrenal gland| ascites| bladder| blood| bone| bone marrow| brain| connective tissue| embryonic tissue| eye| heart| intestine| kidney| larynx| liver| lung| lymph| lymph node| mammary gland| mouth| muscle| nerve| ovary| pancreas| parathyroid| pharynx| pituitary gland| placenta| prostate| salivary gland| skin| stomach| testis| thymus| thyroid| trachea| uterus| vascular|adrenal tumor| bladder carcino…	NM_024524	GO:0006874	cellular calcium ion homeostasis	not recorded	NM_024524	GO:0005887	integral component of plasma membrane	not recorded	NM_024524	GO:0005524	ATP binding	inferred from electronic annotation	NA	NA	NA	ENST00000256031	Pfam	IPR004014	Cation-transporting P-type ATPase, N-terminal	5.33098	6.29229
TC0400006604.hg.1	5.54056	6.16869	-1.54555	down	AL590235.1	Sequence 48630 from Patent EP1572962. (from mRNA JD067606)	coding	chr4	+	uc062uvi.1	3538044	3538418	10	NA	NA	uc062uvi.1	UCSC Genes	N/A	chr4	100	100	0	NA	ENST00000623890	Q9BXE4	NA	NA	NA	NA	NA	NA	NA	NA	NA	NA	NA	NA	NA	NA	NA	NA	NA	NA	NA	NA	NA	NA	5.54056	6.16869
TC0400006639.hg.1	3.28754	3.97117	-1.60618	down	NSG1	neuron specific gene family member 1	coding	chr4	+	NM_001040101	4348140	4419058	10	4p16.3	27065	NM_001040101	RefSeq	Homo sapiens neuron specific gene family member 1 (NSG1), transcript variant 2, mRNA.	chr4	100	100	0	NA	NM_001040101	P42857	NM_001040101	Hs.518595	adrenal gland| blood| brain| cervix| connective tissue| ear| embryonic tissue| esophagus| eye| heart| intestine| kidney| liver| lung| mammary gland| nerve| ovary| pancreas| parathyroid| pituitary gland| placenta| prostate| skin| spleen| stomach| testis| thymus| umbilical cord| uterus| vascular| colorectal tumor| esophageal tumor| germ cell tumor| glioma| kidney tumor| leukemia| liver tumor| non-n…	NM_001040101	GO:0001921	positive regulation of receptor recycling	inferred from electronic annotation	NM_001040101	GO:0000139	Golgi membrane	inferred from electronic annotation	NM_001040101	GO:0005102	receptor binding	inferred from electronic annotation	NA	NA	NA	ENST00000397958	Pfam	IPR009431	Calcyon neuron-specific vesicular protein	3.28754	3.97117
TC0400006685.hg.1	6.85179	5.74835	2.14866	up	WFS1	Wolfram syndrome 1 (wolframin)	coding	chr4	+	NM_001145853	6269849	6303265	10	4p16.1	7466	NM_001145853	RefSeq	Homo sapiens Wolfram syndrome 1 (wolframin) (WFS1), transcript variant 2, mRNA.	chr4	100	100	0	NA	NM_001145853	O76024	NM_001145853	Hs.518602	adrenal gland| bone| brain| connective tissue| embryonic tissue| eye| heart| intestine| kidney| larynx| liver| lung| lymph node| mammary gland| muscle| nerve| ovary| pancreas| parathyroid| placenta| prostate| skin| spleen| stomach| testis| thymus| thyroid| trachea| umbilical cord| uterus|adrenal tumor| breast (mammary gland) tumor| chondrosarcoma| colorectal tumor| gastrointestinal tumor| germ ce…	NA	NA	NA	NA	NM_001145853	GO:0005783	endoplasmic reticulum	inferred from sequence or structural similarity	NM_001145853	GO:0005515	protein binding	inferred from physical interaction	NA	NA	NA	NA	NA	NA	NA	6.85179	5.74835
TC0400006689.hg.1	5.36118	4.61918	1.67249	up	MAN2B2	mannosidase, alpha, class 2B, member 2	coding	chr4	+	NM_001292038	6575174	6623362	10	4p16.1	23324	NM_001292038	RefSeq	Homo sapiens mannosidase, alpha, class 2B, member 2 (MAN2B2), transcript variant 2, mRNA.	chr4	100	100	0	NA	NM_001292038	Q9Y2E5	NM_001292038	Hs.188464	ascites| blood| bone marrow| brain| connective tissue| embryonic tissue| eye| heart| intestine| kidney| larynx| liver| lung| lymph node| mammary gland| mouth| muscle| nerve| ovary| pancreas| pituitary gland| placenta| prostate| skin| stomach| testis| thyroid| tonsil| trachea| uterus| vascular| bladder carcinoma| breast (mammary gland) tumor| chondrosarcoma| colorectal tumor| gastrointestinal tumo…	NM_001292038	GO:0006013	mannose metabolic process	not recorded	NM_001292038	GO:0005774	vacuolar membrane	not recorded	NM_001292038	GO:0004559	alpha-mannosidase activity	not recorded	NA	NA	NA	ENST00000285599	Pfam	IPR000602	Glycoside hydrolase family 38, N-terminal domain	5.36118	4.61918
TC0400006692.hg.1	7.2998	8.09434	-1.73452	down	MRFAP1	Morf4 family associated protein 1	coding	chr4	+	NM_001272053	6640091	6642745	10	4p16.1	93621	NM_001272053	RefSeq	Homo sapiens Morf4 family associated protein 1 (MRFAP1), transcript variant 2, mRNA.	chr4	100	100	0	NA	NM_001272053	Q9Y605	NM_001272053	Hs.406590	adipose tissue| adrenal gland| ascites| bladder| blood| bone| bone marrow| brain| cervix| connective tissue| ear| embryonic tissue| esophagus| eye| heart| intestine| kidney| larynx| liver| lung| lymph| lymph node| mammary gland| mouth| muscle| nerve| ovary| pancreas| pharynx| pituitary gland| placenta| prostate| skin| spleen| stomach| testis| thymus| thyroid| trachea| uterus| vascular|adrenal tum…	NA	NA	NA	NA	NM_001272053	GO:0005634	nucleus	inferred from direct assay	NM_001272053	GO:0005515	protein binding	inferred from physical interaction	NA	NA	NA	ENST00000320912	Pfam	IPR029254	MORF4 family-associated protein 1	7.2998	8.09434
TC0400006699.hg.1	3.56435	2.85463	1.63548	up	BLOC1S4	biogenesis of lysosomal organelles complex-1, subunit 4, cappuccino	coding	chr4	+	NM_018366	6716055	6717671	10	4p16.1	55330	NM_018366	RefSeq	Homo sapiens biogenesis of lysosomal organelles complex-1, subunit 4, cappuccino (BLOC1S4), mRNA.	chr4	100	100	0	NA	NM_018366	Q9NUP1	NM_018366	Hs.7570	ascites| blood| bone| brain| connective tissue| embryonic tissue| eye| intestine| kidney| lung| lymph| lymph node| ovary| pancreas| parathyroid| placenta| prostate| salivary gland| skin| stomach| testis| thymus| tonsil| uterus| chondrosarcoma| colorectal tumor| gastrointestinal tumor| germ cell tumor| glioma| head and neck tumor| kidney tumor| lung tumor| lymphoma| normal| ovarian tumor| pancreat…	NM_018366	GO:0006892	post-Golgi vesicle-mediated transport	traceable author statement	NM_018366	GO:0005737	cytoplasm	inferred from sequence or structural similarity	NM_018366	GO:0005515	protein binding	inferred from physical interaction	NA	NA	NA	NA	NA	NA	NA	3.56435	2.85463
TC0400006800.hg.1	2.58434	1.82446	1.69335	up	USP17L18	ubiquitin specific peptidase 17-like family member 18	coding	chr4	+	ENST00000504209	9248630	9250581	10	4p16.1	100287364	ENST00000504209	ENSEMBL	ubiquitin specific peptidase 17-like family member 18 [gene_biotype:protein_coding transcript_biotype:protein_coding]	chr4	100	100	0	NA	ENST00000504209	D6R9N7	ENST00000504209	Hs.741138	NA	ENST00000504209	GO:0016579	protein deubiquitination	not recorded	ENST00000504209	GO:0005634	nucleus	not recorded	ENST00000504209	GO:0004197	cysteine-type endopeptidase activity	not recorded	NA	NA	NA	ENST00000504209	Pfam	IPR001394	Peptidase C19, ubiquitin carboxyl-terminal hydrolase	2.58434	1.82446
TC0400006802.hg.1	2.84494	1.94377	1.86759	up	USP17L19	ubiquitin specific peptidase 17-like family member 19	coding	chr4	+	NM_001256860	9253378	9255329	10	4p16.1	100287404	NM_001256860	RefSeq	Homo sapiens ubiquitin specific peptidase 17-like family member 19 (USP17L19), mRNA.	chr4	100	100	0	NA	NM_001256860	D6RCP7	NM_001256860	Hs.741137	NA	NM_001256860	GO:0016579	protein deubiquitination	not recorded	NM_001256860	GO:0005634	nucleus	not recorded	NM_001256860	GO:0004197	cysteine-type endopeptidase activity	not recorded	NA	NA	NA	ENST00000515566	Pfam	IPR001394	Peptidase C19, ubiquitin carboxyl-terminal hydrolase	2.84494	1.94377
TC0400006994.hg.1	5.79114	6.88695	-2.13733	down	NCAPG	non-SMC condensin I complex subunit G	coding	chr4	+	NM_022346	17810813	17844864	10	4p15.33	64151	NM_022346	RefSeq	Homo sapiens non-SMC condensin I complex, subunit G (NCAPG), transcript variant 1, mRNA.	chr4	100	100	0	NA	NM_022346	Q9BPX3	NM_022346	Hs.567567	ascites| blood| bone| bone marrow| brain| cervix| connective tissue| embryonic tissue| eye| heart| intestine| kidney| liver| lung| lymph| lymph node| mammary gland| mouth| muscle| ovary| pancreas| placenta| prostate| salivary gland| skin| stomach| testis| thymus| thyroid| tonsil| uterus| vascular| breast (mammary gland) tumor| cervical tumor| chondrosarcoma| colorectal tumor| gastrointestinal tum…	NM_022346	GO:0000278	mitotic cell cycle	traceable author statement	NM_022346	GO:0000796	condensin complex	inferred from direct assay	NM_022346	GO:0005515	protein binding	inferred from physical interaction	NA	NA	NA	ENST00000251496	Pfam	IPR025977	Nuclear condensin complex subunit 3, C-terminal domain	5.79114	6.88695
TC0400007128.hg.1	2.59474	3.74848	-2.2249	down	TBC1D19	TBC1 domain family, member 19	coding	chr4	+	NM_001292054	26576437	26769852	10	4p15.2	55296	NM_001292054	RefSeq	Homo sapiens TBC1 domain family, member 19 (TBC1D19), transcript variant 2, mRNA.	chr4	100	100	0	NA	NM_001292054	Q8N5T2	NM_001292054	Hs.479403	adrenal gland| bladder| brain| embryonic tissue| eye| kidney| liver| lung| lymph node| muscle| ovary| parathyroid| placenta| prostate| testis| thymus| uterus| vascular| chondrosarcoma| gastrointestinal tumor| germ cell tumor| glioma| leukemia| liver tumor| normal| ovarian tumor| prostate cancer|embryoid body| blastocyst| fetus| adult	NM_001292054	GO:0043547	positive regulation of GTPase activity	inferred from electronic annotation	NA	NA	NA	NA	NM_001292054	GO:0005096	GTPase activator activity	inferred from electronic annotation	NA	NA	NA	ENST00000264866	Pfam	IPR000195	Rab-GTPase-TBC domain	2.59474	3.74848
TC0400007276.hg.1	4.04305	5.11578	-2.10342	down	KLHL5	kelch-like family member 5	coding	chr4	+	NM_001007075	39044831	39126857	10	4p14	51088	NM_001007075	RefSeq	Homo sapiens kelch-like family member 5 (KLHL5), transcript variant 3, mRNA.	chr4	100	100	0	NA	NM_001007075	Q96PQ7	NM_001007075	Hs.272251	ascites| blood| bone| bone marrow| brain| cervix| connective tissue| embryonic tissue| esophagus| eye| intestine| kidney| liver| lung| lymph| lymph node| mammary gland| mouth| muscle| nerve| ovary| pancreas| pharynx| placenta| prostate| skin| spleen| stomach| testis| thymus| thyroid| uterus| vascular| breast (mammary gland) tumor| cervical tumor| chondrosarcoma| colorectal tumor| esophageal tumor…	NM_001007075	GO:0016567	protein ubiquitination	not recorded	NM_001007075	GO:0005737	cytoplasm	non-traceable author statement	NM_001007075	GO:0003779	actin binding	inferred from electronic annotation	NA	NA	NA	ENST00000261425	Pfam	IPR000210	BTB/POZ domain	4.04305	5.11578
[truncated: 1,219 more rows]

## Sheet: LncRNA  FC>1.5
probe_set	Test1_average	Con_average	FC	Regulation	Gene.Symbol	Description	biotype	Chromosome	Strand	Public.Gene.IDs	Start	Stop	total_probes	Cytoband	Entrez.ID	mRNA.Accession	mRNA.Source	mRNA.Description	mRNA.SeqName	mRNA.Assignment.Score	mRNA.Assignment.Coverage	mRNA.Direct.Probes	mRNA.Possible.Probes	SwissProt.mRNA.Accession	SwissProt.Accession	UniGene.Accession	UniGene.ID	UniGene.Expression.Information	GO.Biological.Process.Accession	GO.Biological.Process.ID	GO.Biological.Process.Term	GO.Biological.Process.Evidence	GO.Cellular.Component.Accession	GO.Cellular.Component.ID	GO.Cellular.Component.Term	GO.Cellular.Component.Evidence	GO.Melecular.Function.Accession	GO.Molecular.Function.ID	GO.Molecular.Function.Term	GO.Molecular.Function.Evidence	Pathway.Accession	Pathway.Source	Pathway.Name	Protein.Domains.mRNA.Accession	Protein.Domains.Source	Protein.Domains.Accession	Protein.Domains.Description	Test1_expression	Con_expression
[truncated: 1,002 more rows]

[truncated: 3 more sheets: circRNA  FC>1.5, small_RNA  FC>1.5, others  FC>1.5]
